# Supplementary material
Source: PubMed Central journal article supplement (PMC5042863)
Supplement: NIHMS810971-supplement-1.pdf [file NIHMS810971-supplement-1.pdf]

1 **SUPPLEMENTARY NOTE**

2 **Table of Contents**

3 1 Studies contributing to systolic (SBP) and diastolic blood pressure (DBP) analyses..... 3

4 2 Consortia and studies providing association results for cardiovascular outcomes ..... 3

5 2.1 CHARGE - Heart Failure Working Group..... 3

6 2.2 EchoGen (LM mass and LV weight) ..... 3

7 2.3 NEURO-CHARGE (stroke) ..... 3

8 2.4 MetaStroke (stroke) ..... 4

9 2.5 CARDIoGRAMplusC4D (CAD) ..... 4

10 2.6 CHARGE CKDgen (CKD, eGFR, microalbuminuria, UACR) ..... 4

11 2.7 KidneyGen (creatinine)..... 5

12 2.8 CHARGE (cIMT)..... 5

13 2.9 CHARGE (mild retinopathy, central retinal artery caliber) ..... 5

14 2.10 SEED (mild retinopathy, central retinal artery caliber) ..... 5

15 3 European ancestry meta-analysis..... 6

16 3.1 Stage 2 meta-analyses ..... 6

17 3.2 Stage 3 meta-analyses ..... 7

18 3.3 Stage 4: combined meta-analyses and validation in UK Biobank..... 7

19 3.4 Systematic PubMed search +/- 100kb of each newly discovered index SNP ..... 8

20 3.5 Trait variance explained ..... 8

21 4 European ancestry GCTA-COJO analysis ..... 9

22 5 Conditional analyses in the Women’s Genome Health Study (WGHS) ..... 10

23 6 Fine mapping and determination of credible sets of causal SNPs ..... 10

24 7 Expression quantitative trait loci (eQTLs) analyses..... 12

25 7.1 Whole Blood (NESDA/NTR dataset) ..... 12

26 7.2 Whole blood (FHS dataset) ..... 13

27 7.3 Lymphoblastoid cell lines, skin and fat biopsies (MuTHER datasets) ..... 14

28 7.4 Monocytes and macrophages (Cardiogenics) ..... 14

29 7.5 Advanced Study of Aortic Pathology (ASAP) dataset..... 14

30 7.6 Kidney ..... 15

31 7.7 Selected published eQTL datasets ..... 16

32 8 Enrichment of BP variants in experimentally annotated regulatory marks ..... 16

33 8.1 Analysis of cell-specific DNase hypersensitivity sites (DHSs) using an OR method ..... 16

34 8.2 Analysis of tissue-specific enrichment of BP variants and H3K4me3 sites ..... 17

35 8.3 Analysis of tissue-specific DHSs and chromatin states using Genomic Regulatory Elements and GWAS Overlap

36 Algorithm (GREGOR)..... 17

|    |       |                                                                                                                                                   |     |
|----|-------|---------------------------------------------------------------------------------------------------------------------------------------------------|-----|
| 1  | 8.4   | Formaldehyde-assisted isolation of regulatory elements (FAIRE) analysis of BP variants in fine mapping regions in lymphoblastoid cell lines ..... | 18  |
| 2  |       |                                                                                                                                                   |     |
| 3  | 9     | Pathway analyses .....                                                                                                                            | 19  |
| 4  | 9.1   | MAGENTA .....                                                                                                                                     | 19  |
| 5  | 9.2   | Data-driven Expression Prioritized Integration for Complex Traits (DEPICT).....                                                                   | 19  |
| 6  | 10    | Non-European meta-analysis .....                                                                                                                  | 20  |
| 7  | 11    | Genetic risk score and cardiovascular outcomes.....                                                                                               | 21  |
| 8  | 12    | Literature review for genes at the newly discovered loci .....                                                                                    | 21  |
| 9  | 12.1  | FDG5 .....                                                                                                                                        | 22  |
| 10 | 12.2  | ZC3HC1 .....                                                                                                                                      | 22  |
| 11 | 12.3  | DBH .....                                                                                                                                         | 22  |
| 12 | 12.4  | INSR .....                                                                                                                                        | 23  |
| 13 | 12.5  | HIVEP3 .....                                                                                                                                      | 23  |
| 14 | 12.6  | TRIM36.....                                                                                                                                       | 23  |
| 15 | 12.7  | CSNK1G3 .....                                                                                                                                     | 24  |
| 16 | 12.8  | SETBP1 .....                                                                                                                                      | 24  |
| 17 | 12.9  | SIK1 .....                                                                                                                                        | 24  |
| 18 | 12.10 | MYBPC3.....                                                                                                                                       | 25  |
| 19 | 13    | Supplementary table list and legends.....                                                                                                         | 26  |
| 20 | 14    | Supplementary figures .....                                                                                                                       | 34  |
| 21 | 15    | References .....                                                                                                                                  | 81  |
| 22 | 16    | Acknowledgments .....                                                                                                                             | 87  |
| 23 | 17    | Members of consortia .....                                                                                                                        | 103 |
| 24 | 18    | Author information .....                                                                                                                          | 109 |
| 25 |       |                                                                                                                                                   |     |

## 1 **1 Studies contributing to systolic (SBP) and diastolic blood pressure (DBP) analyses**

2 The cohorts contributing to the discovery meta-analysis for individuals of European ancestry comprise of  
3 studies that were directly genotyped using Cardio-MetaboChip, studies in the published ICBP-GWAS  
4 dataset<sup>1</sup>, and new GWAS studies. The total sample size is N=201,529. The validation dataset comprised  
5 individuals of European ancestry from UK Biobank, N=140,886. A targeted lookup of 66 SNPs was  
6 performed in studies of non-European ancestry (East Asian N= 9,637, South Asian N= 20,875, and African  
7 and African-American ancestry N= 33,909). Details on each of the studies including study design and BP  
8 measurement are provided in **Supplementary Table 1**, genotyping information in **Supplementary Table**  
9 **2**, and participant characteristics in **Supplementary Table 3**.

10 All participants provided written informed consent and the studies were approved by their local  
11 Research Ethics Committees and/or Institutional Review Boards.

## 12 **2 Consortia and studies providing association results for cardiovascular outcomes**

13 We obtained phenotype-genotype association summary statistics (effect size, standard error, and *P*  
14 value) for up to 66 SNPs of interest, by requesting "look-ups" in the results of analyses that had already  
15 been conducted by consortia and research groups for cardiovascular and other end-organ outcomes. In  
16 this section, we briefly summarize relevant information about each consortium.

### 17 **2.1 CHARGE - Heart Failure Working Group**

18 We obtained association summary statistics for SNPs of interest from the meta-analysis of 4 cohorts of  
19 European ancestry with a total of 20,926 participants free of clinical heart failure at baseline, in whom  
20 2,526 incident heart failure events occurred during follow-up<sup>2</sup>. All cohorts included in the heart failure  
21 analysis are included in the published ICBP-GWAS discovery dataset<sup>1</sup>.

### 22 **2.2 EchoGen (LM mass and LV weight)**

23 Association summary statistics for left ventricular (LV) mass and LV wall thickness were obtained from  
24 the discovery meta-analysis described previously<sup>3</sup>. The discovery analysis for this study combined data  
25 from 5 cohorts of European ancestry with a total sample size of N = 12,612. Four of the cohorts (CHS,  
26 RS, KORA F3, FHS) with total N = 9,312, overlap the studies which are included in the published ICBP-  
27 GWAS discovery dataset<sup>1</sup>.

### 28 **2.3 NEURO-CHARGE (stroke)**

29 Association summary statistics for risk of incident stroke were obtained from the discovery meta-  
30 analysis of the CHARGE consortium, described previously<sup>4</sup>. The discovery analysis for these phenotypes

1 combined data from 4 cohorts of European ancestry with a total sample size of N = 19,602, all of which  
2 were included in the ICBP-GWAS dataset<sup>1</sup>.

### 3 **2.4 MetaStroke (stroke)**

4 Association summary statistics for ischemic risk stroke were obtained from the discovery meta-analysis  
5 of the MetaStroke consortium, described previously<sup>5</sup>. The discovery analysis for these phenotypes  
6 included N = 11,012 ischemic stroke cases and N = 40,824 controls after excluding four cohorts (ARIC,  
7 CHS, FHS and RS) which are included in the NEURO-CHARGE dataset. There is some overlap of  
8 individuals from deCODE and 58BC contributing to the Cardio-MetaboChip BP analyses.

### 9 **2.5 CARDIoGRAMplusC4D (CAD)**

10 Association summary statistics were obtained from the Coronary ARtery Disease Genome-wide  
11 Replication And Meta-analysis (CARDIoGRAM) plus C4D consortium which combines data from GWAS  
12 and Cardio-MetaboChip studies including 63,746 cases with coronary artery disease (CAD) and/or  
13 Myocardial Infarction (MI) and 130,681 controls of European and South Asian ancestry<sup>6</sup>. More than 80%  
14 of the individuals in these analyses are included in the Cardio-MetaboChip and GWAS BP analyses.

### 15 **2.6 CHARGE CKDgen (CKD, eGFR, microalbuminuria, UACR)**

16 Association summary statistics for estimated glomerular filtration rate estimated from creatinine  
17 (eGFRcr) were obtained from the discovery meta-analysis of the CKDGen consortium (all samples of  
18 European ancestry), described previously<sup>7</sup>. The discovery analysis for these phenotypes combined data  
19 from 26 cohorts with a total sample size of N = 74,354. Seventeen of these cohorts (AGES, Amish, ARIC,  
20 BLSA, CHS, 1300 samples from ERF, FHS, KORA F3, KORA F4, MICROS, NSPHS, ORCADES, RS, RSII, SHIP,  
21 WGHS and Vis) with total N = 65,818, overlap the ICBP-GWAS discovery dataset previously published<sup>1</sup>.  
22 Association summary statistics for dichotomous chronic kidney disease (CKD) were obtained by querying  
23 the same datasets<sup>7</sup>. There are 17 cohorts (AGES, Amish, ARIC, BLSA, CHS, 1300 samples from ERF, FHS,  
24 KORA F3, KORA F4, MICROS, NSPHS, ORCADES, RS, RSII, SHIP, WGHS and Vis), with total N = 60,498,  
25 overlapping the ICBP-GWAS discovery datasets. Association summary statistics for eGFR estimated from  
26 cystatin C (eGFRcys) were obtained from 10 datasets; 7 of these cohorts (Amish, ARIC, CHS, FHS, KORA  
27 F3&F4, MICROS, and SHIP) with N = 21,274 overlap the discovery cohorts in the published ICBP-GWAS  
28 dataset<sup>1</sup>. Association summary statistics for urinary albumin:creatinine ratio (UACR) phenotypes  
29 combined data from 12 cohorts with a total sample size of N = 31,580. Individuals in all 12 of the  
30 cohorts overlap the ICBP-GWAS dataset<sup>1</sup>. Microalbuminuria was defined as UACR > 25 mg/g in women  
31 or > 17 mg/g in men<sup>8</sup>.



1 **2.7 *KidneyGen (creatinine)***

2 Association summary statistics for serum creatinine were obtained from the discovery meta-analysis of  
3 the KidneyGen consortium, described previously<sup>9</sup>. The discovery analysis for this study combined data  
4 from 9 cohorts, all of European ancestry, with a total sample size of N = 23,812. Six of the cohorts  
5 (CoLaus, SardiNIA, 873 samples from TwinsUK, Fenland, InCHIANTI, NFBC1966) with a total sample size  
6 of N = 17,699, overlap the ICBP-GWAS discovery dataset<sup>1</sup>.

7 **2.8 *CHARGE (cIMT)***

8 Association summary statistics for carotid intimal thickness (cIMT) were obtained from the discovery  
9 meta-analysis of the CHARGE consortium<sup>10</sup>. Each study evaluated the carotid arteries with high-  
10 resolution B-mode ultrasonography, and cIMT was defined as the average of multiple measurements  
11 from both the left and right arteries. The discovery analysis combined data from 9 cohorts, all of  
12 European ancestry, with a total sample size N = 31,211. All cohorts (AGES, Amish, ARIC, CHS, ERF, FHS,  
13 RS, Sardinia and SHIP) overlap the ICBP-GWAS discovery dataset<sup>1</sup>.

14 **2.9 *CHARGE (mild retinopathy, central retinal artery caliber)***

15 Association summary statistics for mild retinopathy were obtained from the discovery meta-analysis of  
16 the CHARGE consortium. Retinopathy is defined as the presence of micro-aneurysms or dot-blot  
17 hemorrhages<sup>11</sup>. The discovery analysis combined data from 6 cohorts, all of European ancestry, with a  
18 total sample size of N = 18,411. Five of the cohorts, AGES, ARIC, CHS, RS, and MESA, overlap the ICBP-  
19 GWAS samples. Association summary statistics for central retinal artery caliber were obtained from the  
20 discovery meta-analysis of the CHARGE consortium. Participants underwent film or digital retinal  
21 photography, and the images were analyzed with a semi-automated retinal vessel measurement  
22 system<sup>12</sup>. The discovery analysis for this study combined data from 5 cohorts, with a total sample size of  
23 N = 18,722. Four of the cohorts (AGES, ARIC, CHS and RS) overlap the ICBP-GWAS discovery dataset<sup>1</sup>.

24 **2.10 *SEED (mild retinopathy, central retinal artery caliber)***

25 Association summary statistics for mild retinopathy were obtained from the discovery meta-analysis of  
26 the Singapore Epidemiology of Eye Diseases (SEED) Study (unpublished). Retinopathy and central retinal  
27 artery caliber were measured as previously described<sup>11,12</sup>. The discovery analysis for this study has a  
28 total sample size of N = 6,976. None of the studies overlap the BP cohorts analyzed in the current  
29 report.

### 1 3 European ancestry meta-analysis

2 A meta-analysis of 201,529 individuals of European descent was undertaken in four stages. The study  
3 design is summarized in **Supplementary Figure 1**. The stage 1 meta-analyses consisted of 109,096  
4 individuals of European descent across 46 studies (**Supplementary Tables 2-3**). All samples were  
5 genotyped using the Cardio-MetaboChip genotype array<sup>13</sup>. Sample and SNP quality control (QC) were  
6 undertaken by each study separately. All SNPs with minor allele frequency (MAF) > 1%, Hardy-Weinberg  
7 Equilibrium (HWE)  $P > 1 \times 10^{-7}$  and per SNP call-rate > 0.98 were separately tested for association with  
8 SBP and DBP in a linear regression framework assuming an additive model. The BP values were  
9 treatment corrected by adding 15 mm Hg to the measured SBP and 10 mmHg to DBP in individuals on  
10 one or more anti-hypertensive medications<sup>14</sup>. Association analyses included sex (some studies stratified  
11 their analyses by gender instead), age, age-squared, and BMI as covariates, except where these  
12 covariates were identical for all individuals, such as birth cohorts of individuals born in the same year.  
13 Where available and appropriate, additional covariates were used to correct for potential within-cohort  
14 stratification. The results of each GWAS were corrected for residual stratification using the genomic  
15 control inflation factor<sup>1,15</sup>. As the Cardio-MetaboChip was designed in part on the basis of association  
16 results from the ICBP-GWAS analysis of SBP and DBP, we observed, as expected, test statistic inflation in  
17 association signals across the content of this array. The results of each study were therefore corrected  
18 for residual population structure using the genomic control inflation factor obtained from a subset of  
19 SNPs that were not found to be associated with BP in the earlier ICBP-GWAS. This set of “putative null  
20 BP SNPs” was chosen to be the overlap of the Cardio-MetaboChip SNPs with the GWAS SNPs imputed  
21 from HapMap if the association test significance for both SBP and DBP were both  $P > 0.10$ . All SNPs lying  
22 in fine mapping regions (defined as average inter-SNP distance < 5kb using a 10 inter-SNP sliding  
23 window) were also excluded from the “putative null BP SNPs” dataset, resulting in a final set of 44,951  
24 “putative null BP SNPs”. The results of all Cardio-MetaboChip studies were combined by inverse-  
25 variance weighted fixed-effects meta-analysis, with the results subsequently corrected by a second  
26 round of genomic-control using “putative null BP SNPs”, with  $\lambda_{GC} = 1.15$  for both SBP and DBP.

#### 27 3.1 Stage 2 meta-analyses

28 The stage 2 meta-analyses consisted of 35,952 individuals of European descent across four GWA studies  
29 which were not part of the 2011 ICBP-GWAS (WGHS, JUPITER, NESDA, MESA, see **Supplementary**  
30 **Tables 1-3** for abbreviations and details) and SNPs overlapping with Cardio-MetaboChip SNPs were  
31 used. Samples were genotyped with a range of GWAS genotyping arrays and unmeasured SNPs were  
32 imputed using samples from the International HapMap Project for three of the studies and from the

1 1000 Genomes Project Consortium<sup>16</sup> for one study (see **Supplementary Table 2** for details of data  
2 cleaning and imputation reference panels). The same QC and analytical protocols implemented for  
3 studies in stage 1 were also applied to stage 2 studies with the exception that genome-wide SNPs were  
4 used per study for a first round of genomic-control (**Supplementary Figure 1**). For each SNP with  
5 imputation quality  $r^2 > 0.3$ , association summary statistics were combined across studies by means of  
6 inverse-variance weighted fixed-effects meta-analysis, with results subsequently corrected by a second  
7 round of genomic control based on all genome-wide SNPs ( $\lambda_{GC} = 1.02/1.01$  for SBP/DBP respectively).

### 8 **3.2 Stage 3 meta-analyses**

9 The stage 3 meta-analyses consisted of 56,481 individuals of European ancestry from 24 published ICBP-  
10 GWAS studies<sup>1</sup> (**Supplementary Tables 1-3**). Samples were genotyped using a range of commercially  
11 available arrays with > 300,000 SNPs. Genotypes for unmeasured SNPs were imputed using CEU  
12 samples from Phase 2 of the International HapMap Project Consortium<sup>17</sup> and a common set of ~2.5M  
13 SNPs available across the samples were available for analysis. Within each study, sample and SNP  
14 quality control procedures were implemented<sup>1</sup>. SNPs with MAF > 1% and passing QC were tested for  
15 association with SBP and DBP under additive genetic models in a linear regression framework with  
16 adjustment for the same covariates as in stages 1 and 2. Genome-wide SNPs were used per study for a  
17 first round of genomic-control (**Supplementary Figure 1**). For each SNP with imputation quality  $r^2 > 0.3$ ,  
18 association summary statistics were combined across studies by means of inverse-variance weighted  
19 fixed-effects meta-analysis, with results subsequently corrected by a second round of genomic control  
20 using all SNPs ( $\lambda_{GC} = 1.12/1.11$  for SBP/DBP respectively).

### 21 **3.3 Stage 4: combined meta-analyses and validation in UK Biobank**

22 The results of the stage 1, stage 2, and stage 3 meta-analyses for SBP and DBP were combined for all  
23 Cardio-MetaboChip SNPs by means of inverse-variance weighted fixed-effects meta-analysis. The  
24 combined meta-analyses consisted of 201,529 individuals. A third round of genomic control was not  
25 applied to the combined meta-analyses results because of the ascertainment of the Cardio-MetaboChip  
26 SNPs and of the “putative null SNPs” using results from a subset of the stage 1+2+3 samples ( $\lambda_{GC} =$   
27  $1.00/0.99$  using the “putative null BP SNPs” for SBP/DBP respectively). Small sample size reduces the  
28 statistical power and increases the false positive rate (FDR), and variability in genotyping call rate makes  
29 SNP-by-SNP comparison of  $P$  values difficult. Therefore, SNPs were required to have passed quality  
30 control (whether directly genotyped and imputed) in at least 25% of the total sample size, or were  
31 otherwise excluded from downstream analyses. All meta-analyses were conducted in parallel by two  
32 analysts using a combination of custom scripts and a) the METAL software<sup>18</sup> and b) scripting using the R

1 statistical language<sup>19</sup> respectively. We sought independent validation of newly discovered BP loci using  
2 summary association results from an analysis of UK Biobank participants (**Supplementary Tables 1-3**).  
3 The analysis was restricted to Caucasians according to PCA based on a clustering algorithm, and  
4 unrelated individuals. The mean of two BP recordings was used, and medication-adjusted SBP and DBP  
5 variables were obtained by +10/15 mmHg for those on BP lowering treatment. All SNPs were tested for  
6 association with SBP and DBP in a linear regression framework assuming an additive model. The  
7 association analyses included sex, age, age<sup>2</sup>, BMI, genotyping array, and the top 10 PCs.

8

### 9 **3.4 Systematic PubMed search +/- 100kb of each newly discovered index SNP**

10 To systematically assess whether genes near the index SNPs have been previously described to be  
11 involved in BP regulation or hypertension, we performed a systematic PubMed search. All genes with  
12 any overlap with a 200kb region centered around each of the 17 newly discovered index SNPs were  
13 identified using the UCSC Genome Browser<sup>20</sup>. Two loci did not contain any genes within their genomic  
14 spans (*TBC1D1-FLJ13197*, *CSNK1G3*), the remaining 15 loci overlapped with a total of 64 genes (1-11  
15 genes per locus). A search term was constructed for each gene including the short and long gene name  
16 and the terms “blood pressure” and “hypertension” (e.g. for *NPPA* on chr 1: “*NPPA* OR natriuretic  
17 peptide A AND (blood pressure OR hypertension)”) and the search results of each search term from  
18 PubMed were individually reviewed. Of the 17 newly discovered loci, 6 contained genes within the  
19 200kb interval that were previously described to be related to blood pressure or hypertension (*ELAVL3*,  
20 *CHST12-LFNG*, *RAPSN-PSMC3-SLC39A13*, *DBH*, *CRYAA-SIK1*, *INSR*). Among the 49 known loci there are 3  
21 genes in gene-poor regions without any UCSC Gene in the 200kb interval (*FIGN-GRB14*, *EBF1*, *TBX5-*  
22 *TBX3*). The same search on previous knowledge based on molecular biology could not be performed in a  
23 meaningful way for the known loci as here molecular biology experiments could have been carried out  
24 with the knowledge of a BP GWAS signal.

### 25 **3.5 Trait variance explained**

26 The trait variance explained by all 66 SNPs at novel and known loci was evaluated in one study that had  
27 also been used for the discovery effort (the Atherosclerosis Risk in Communities (ARIC) study. We  
28 constructed a linear regression model with all 66 or the subset of 49 known SNPs in the model,  
29 regressing in the residual from the covariate-adjusted treatment-corrected BP phenotype (SBP or DBP).  
30 R<sup>2</sup> from the regression model was used as trait variance explained. Some over-fitting of these estimates  
31 may exist due to the sample overlap between the individual cohorts and the overall meta-analysis  
32 samples and because each regression model will estimate the best estimate of the per-SNP effect for

1 that sample. The variance explained ( $r^2$  implemented in the `lm()` function of R Statistical language) were  
2 calculated for SBP and DBP respectively (one SNP per locus). The phenotypes used in the regression  
3 were adjusted for BP lowering medication in the same way as in the meta-analysis and we used age,  
4 age<sup>2</sup>, sex, and BMI as covariates. One SNP (rs9268977) was missing in ARIC and was replaced by a  
5 perfect proxy.

#### 6 **4 European ancestry GCTA-COJO analysis**

7 To identify multiple distinct association signals within BP loci we undertook a model selection procedure  
8 implemented in the GCTA-COJO software package<sup>21,22</sup>. SNPs are selected by GCTA-COJO as  
9 conditionally-independently associated with a trait, at a pre-determined level of significance. GCTA-  
10 COJO employs approximate conditional analyses using association summary statistics from the meta-  
11 analysis and the linkage disequilibrium (LD) between variants (and estimates the correlation between  
12 allelic effects in a joint association model) estimated from a reference dataset of individual-level  
13 genotype data, preferentially a study contributing to the meta-analysis. Although the set of SNPs  
14 selected and their effect estimates are expected to depend somewhat on the reference dataset, the  
15 results should be fairly robust when the LD pattern between variants in the cohorts under consideration  
16 is well represented by the reference dataset (when it is large and includes individuals with similar  
17 ancestral histories and therefore genotype frequencies and correlations) and thus offers good coverage  
18 of the SNPs in the meta-analysis<sup>21</sup>.

19 To evaluate the robustness of the GCTA-COJO results to the choice of reference data set, model  
20 selection was performed using the LD between variants in separate analyses from two datasets of  
21 European descent, both with individuals from the UK with Cardio-MetaboChip genotype data: GoDARTS  
22 with 7,006 individuals and WTCCC1-T2D/58BC with 2,947 individuals. Assuming that the LD between  
23 SNPs more than 10 Mb away or on different chromosomes is zero, we undertook the GCTA-COJO step-  
24 wise model selection to select SNPs independently associated with SBP and DBP, in turn, at a genome-  
25 wide significance, given by  $P < 5 \times 10^{-8}$  (**Supplementary Tables 6-8**) using the stage 4 combined European  
26 GWAS+ Cardio-MetaboChip meta-analysis.

27 Although the sets of SNPs selected by GCTA-COJO as associated with SBP or DBP when using  
28 either reference dataset were very similar, with the estimated effect sizes in the joint association model  
29 highly correlated, a small number of differences were observed. These were always the result of minor  
30 differences between the estimated association  $P$  value for the joint model, with some SNPs falling on  
31 either side of the  $P < 5 \times 10^{-8}$  threshold when using one dataset as reference but not the other. Given  
32 these observations, we chose to report, as primary, the results when using GoDARTS as reference data

1 set given its larger sample size. **Supplementary Figure 7** present locus zoom plots<sup>23</sup> for the 13 BP loci  
2 with more than one association signal.

### 3 **5 Conditional analyses in the Women’s Genome Health Study (WGHS)**

4 To further test for the presence of independent signals of association at the same locus, we performed  
5 multivariable regression modeling in a large single cohort study with simultaneous adjustment for each  
6 possible combination of putative independent SNPs from a) the Cardio-MetaboChip analysis and b) a  
7 comprehensive manual review of the literature (**Supplementary Table 9**). A total of 46 SNPs were  
8 considered (**Supplementary Table 10**). We used genome-wide genotyping data imputed to 1000  
9 Genomes in the WGHS, N = 23,047. The regression modeling was performed in the R statistical  
10 language with adjustment for age, age<sup>2</sup>, sex, and BMI<sup>19</sup>. If a locus included 3 different SNPs (a, b and c),  
11 we tested association of each SNP in an individual model (model #1: a; model #2: b; model #3: c), as well  
12 as the three models with 2 SNPs (model #4: a, b; model #5: b, c; model #6: a, c) and finally a model with  
13 all 3 SNPs (model #7: a, b, c).

### 14 **6 Fine mapping and determination of credible sets of causal SNPs**

15 We used association summary statistics from the European ancestry meta-analyses to define credible  
16 sets of variants that are most likely to drive the association signal (or tag an unobserved variant driving  
17 the association signal) across Cardio-MetaboChip fine mapping regions. Given the summary statistics  
18 from the European ancestry meta-analysis, an approximate Bayes’ factor<sup>24</sup> in favor of association of SNP  
19  $j$  with the trait can be defined by

$$ABF_j = \sqrt{1 - r} \exp\left(\frac{z_j^2}{2} r\right)$$

20 where  $z_j = \frac{\beta_j}{\sigma_j}$  is the Z-statistic for SNP  $j$ , with  $\beta_j$  the allelic effect and  $\sigma_j$  the corresponding standard  
21 error. The shrinkage factor

$$r = \frac{\varepsilon^2}{\sigma_j^2 + \varepsilon^2}$$

22 is the ratio of the prior variance,  $\varepsilon^2$ , to the total variance. Here, we assume  $\varepsilon = 0.2$  in the prior  
23 distribution for  $\beta_j$ <sup>25</sup>. Under the assumption that there is exactly one variant driving the association signal  
24 in a given region, and taking a uniform prior on any of the  $k$  SNPs in the region being the causal variant,  
25 the total Bayes’ factor for the region, measuring the evidence that there is one causal variant in the  
26 region, is then the mean of the single-SNP Bayes’ factors<sup>26</sup>,

$$BF_{region} = \frac{1}{k} \sum_{j=1}^k ABF_j .$$

1           The posterior probability that a given SNP is driving the signal given our data is proportional to  
2 its Bayes' factor

$$3 \quad \Pr(\text{SNP } j \text{ is driving association} \mid \text{data}) = \frac{ABF_j}{k \times BF_{region}} \propto BF_j .$$

4           A 99% credible set of variants can then be constructed by ranking all SNPs in the region based  
5 on their posterior probability and combining them until the cumulative posterior probability exceeds  
6 0.99. Given the data under analysis and if the causal variant is among the genotyped variants or  
7 perfectly correlated to one of the variants, there is therefore at least 99% probability that the  
8 constructed set of variants contains the variant driving the association signal or tags an unobserved  
9 variant driving the association signal.

10           The loci represented on the Cardio-MetaboChip are not all densely covered by design<sup>13</sup>. We  
11 therefore only consider for this analysis the Cardio-MetaboChip fine mapping loci where SNP coverage is  
12 dense. Of these fine mapping regions, some of which selected for a non-BP trait originally, only 24 loci  
13 included at least one SNP that reached genome-wide significance for the BP association in the Stage 4  
14 combined meta-analysis of GWAS+Cardio-MetaboChip among those of European ancestry. The Cardio-  
15 MetaboChip-only analyses often include more eligible SNPs (broader coverage of variants) than  
16 GWAS+Cardio-MetaboChip meta-analyses, because some SNPs are only present on the Cardio-  
17 MetaboChip array, but at the cost of reduced power to detect association due to the smaller sample  
18 size. We therefore determined, for comparison, the credible sets for both the GWAS+Cardio-  
19 MetaboChip and the Cardio-MetaboChip-only meta-analyses. Given that there must be a) adequate  
20 power to detect association<sup>24</sup>, and b) a relatively even sample size across all SNPs that are being  
21 compared, the credible sets were determined using only SNPs with sample size greater than 80% of our  
22 total sample size (Cardio-MetaboChip and GWAS combined). In constructing credible sets, we assume  
23 that there is a single variant driving the association signal in each locus. However, the GCTA-COJO  
24 analyses identified multiple signals of association at 13 of the 66 loci identified in our study as associated  
25 with SBP and/or DBP, while review of the literature identified additional association signals at two loci  
26 that appear to be independent of those identified in our study (**Supplementary Table 9**). Of the 24 loci  
27 considered in our fine mapping analyses, 16 had no evidence for the existence of multiple association  
28 signals, so it is reasonable to assume that there is a single causal SNP and therefore the credible sets of  
29 variants could be constructed as described above using the association summary statistics from the  
30 unconditional meta-analyses. However, in the remaining 8 loci, where evidence of secondary signals

1 was observed from GCTA-COJO, we performed approximate conditional analyses across the region by  
2 conditioning on each index SNP (**Supplementary Table 11**). By adjusting for the other index SNPs at the  
3 locus, we can therefore assume a single variant is driving each “conditionally-independent” association  
4 signal, and we can construct the 99% credible set of variants on the basis of the approximate conditional  
5 analysis from GCTA-COJO (**Supplementary Tables 12-13**). Note that at five of the eight loci with multiple  
6 signals of association, one index SNP mapped outside of the fine mapping region so that a credible set  
7 could not be constructed.

## 8 **7 Expression quantitative trait loci (eQTLs) analyses**

### 9 **7.1 Whole Blood (NESDA/NTR dataset)**

10 The dataset used for eQTL analyses came from samples from the Netherlands Study of  
11 Depression and Anxiety (NESDA)<sup>27</sup> and the Netherlands Twin Registry (NTR)<sup>28</sup> studies. The sample  
12 consisted of 5,071 subjects: 3,109 NTR (from 1,571 families: 614 dizygotic twin pairs; 1 monozygotic  
13 [MZ] triplet; 668 MZ twin pairs; 394 non-twin siblings; and 148 unrelated subjects) and 1,962 NESDA  
14 participants (all unrelated). The blood sampling, RNA and DNA extraction; gene expression  
15 measurements; and gene expression quality control (QC) for the eQTL analyses have been described  
16 previously<sup>29,30</sup>. RNA samples were hybridized to Affymetrix U219 arrays (Affymetrix, Santa Clara, CA).  
17 After filtering, data for analysis remained for 423,201 probes that were summarized into 44,241 probe  
18 sets targeting 18,238 genes. Further RNA analysis was performed in the statistical software R<sup>19</sup>. The  
19 residuals resulting from the linear regression analysis of the probe set intensity values onto the  
20 covariates sex, age, body mass index (kg/m<sup>2</sup>), smoking status coded as a categorical covariate, several  
21 technical covariates (plate, well, hour of blood sampling, lab, etc.) and the scores on three principal  
22 components (PCs) as estimated from the imputed SNP genotype data using the EIGENSOFT package,  
23 were subjected to a principal component analysis, with the aim to further filter out environmental  
24 variation from the data. For each principal component a genome-wide association study was performed,  
25 and the first 50 expression PCs that did not display genome-wide significant SNP associations were,  
26 together with the above mentioned covariates, regressed out of the probe set intensity values before  
27 eQTL analysis.

28 SNP genotype pre-imputation quality control, haplotype phasing, and imputation were  
29 performed as described previously<sup>31</sup> using 1000 Genomes data. The mean imputation quality  $r^2$  metric  
30 equaled 0.38 for all 30,051,533 imputed autosomal SNPs. Following filtering of SNPs based on  
31 Mendelian error rate in families, HWE  $P$  value, imputation quality  $r^2$ , MAF, and comparison of allele



1 frequencies to the 1,000 Genomes reference haplotypes, a total of 7,209,091 SNPs with a mean  $r^2$  of  
2 0.86 were available for eQTL analysis.

3 The eQTL effects were detected using a linear mixed model approach, including for each probe  
4 set the expression level (normalized, residualized and without the first 50 expression PCs) as dependent  
5 variable; the SNP genotype values as fixed effects; and family identifier and zygosity (in the case of  
6 twins) as random effects to account for family and twin relations<sup>32</sup>.

7 The eQTL effects were defined as *cis* when probe set–SNP pairs were at distance  $< 1\text{M}$  base pairs  
8 (Mb), and as *trans* when the SNP and the probe set were separated by more than 1 Mb on the genome  
9 according to hg19. At a FDR of 0.01 used genome-wide, therefore not only considering the candidate  
10 SNPs, for *cis*-eQTL analysis the  $P$  value threshold was  $1 \times 10^{-4}$ , and for *trans*-eQTL analysis  $1 \times 10^{-8}$ . For each  
11 probe set that displayed a statistically significant association with at least one SNP located within its *cis*  
12 region, we identified the most significantly associated SNP and denoted this as the top *cis*-eQTL SNP.

## 13 7.2 Whole blood (FHS dataset)

14 We considered whether any blood pressure SNP association was likely to be explained by  
15 association of the SNP with expression of a nearby gene in whole blood in humans. We tested whether  
16 the BP SNP or a close proxy ( $r^2 > 0.8$ , usually almost 1.0) was associated with a transcript of a gene  
17 within 1 Mb of the lead BP SNP, at an FDR  $< 0.05$ . As association of a blood pressure SNP with  
18 expression of a *cis* transcript could arise due to LD with a stronger and independent eSNP in the region  
19 in a scenario in which two independent signals exist (one BP signal and one eSNP association), we  
20 considered conditional models. For every BP SNP significantly associated with a *cis* transcript, we  
21 identified the best *cis* eSNP for that transcript. We considered strong evidence of one signal and  
22 therefore a possible mediating effect of SNP association with blood pressure through association with  
23 expression of that transcript when the correlation of the BP SNP and best eSNP was strong ( $r^2 > 0.8$ ) and  
24 the significance of the BP-transcript association was substantially attenuated (significance reduced) in a  
25 model adjusting for the best eSNP. In that circumstance, we considered that the BP and expression  
26 association signals coincide and thus nominate the expression effect of the signal as a potential  
27 mediator of the BP association. For SNPs with  $0.3 < r^2 < 0.8$  and significant attenuation of the signal in  
28 conditional models, we considered possible coincidence of a single signal of BP and expression  
29 association. For SNPs with  $r^2 < 0.3$  or SNPs that showed minimal attenuation of the BP-transcript  
30 association in conditional models two independent signals seemed more likely with probably no  
31 coincidence of those signals. Lastly, because BP signals in fine mapping regions are more precisely  
32 localized, we stratified on signal fine mapping (fine mapping of a prior BP SNP association), locus fine

1 mapping (fine mapping of the region) and no fine mapping in the region. The results are summarized in  
2 **Supplementary Table 15.**

### 3 **7.3 Lymphoblastoid cell lines, skin and fat biopsies (MuTHER datasets)**

4 In the MuTHER study, RNA levels were measured in LCLs (N = 826), skin (N = 705) and fat  
5 biopsies (N = 825) from 850 female twins (one-third monozygotic and two-thirds dizygotic) from the  
6 TwinsUK resource using the Illumina HumanHT-12v3 array<sup>33</sup>. Genotyping was performed using three  
7 different arrays - Illumina HumanHap300, HumanHap610Q, and 1M-Duo, 1.2M Duo 1 M chips.  
8 Imputation was done using the IMPUTE software package using two reference panels (HapMap2, a  
9 combined ancestry panel) and a 610K+ panel. We assessed genotype with gene expression associations,  
10 using an additive linear model across a 2Mb window centered on the index BP SNP or proxy SNP. At loci  
11 with significant *cis*-eQTL signal(s) ( $P < 1 \times 10^{-4}$ ), the most strongly associated *cis*-eQTL SNP (eSNP) for the  
12 corresponding transcript was identified. If the BP SNP and the eSNP were the same or in high LD ( $r^2 >$   
13 0.8) the BP SNP was defined as an eSNP. All index BP SNPs (N = 91 at 66 loci see **Supplementary Table**  
14 **9**) or proxies ( $r^2 > 0.8$ , if index SNP was not available) were considered. The results are summarized in  
15 **Supplementary Table 14.**

### 16 **7.4 Monocytes and macrophages (Cardiogenics)**

17 Monocytes and macrophages were collected from healthy subjects and individuals with  
18 coronary artery disease (CAD), and RNA was profiled with the Illumina Human Ref-8 array<sup>34</sup>. Genotyping  
19 was performed using either Human Custom1.2M or Human Quad custom 670 arrays from Illumina. The  
20 eQTL analysis was undertaken in 459 healthy individuals from Cambridge, UK using an additive linear  
21 model across a 2Mb window centered on the index BP SNP or proxy SNP. At loci with significant *cis*-  
22 eQTL signal(s) ( $P < 1 \times 10^{-4}$ ), the most strongly associated *cis*-eQTL SNP (eSNP) for the corresponding  
23 transcript was identified. If the BP SNP and the eSNP were the same or in high LD ( $r^2 > 0.8$ ), the BP SNP  
24 is defined as an eSNP. All index BP SNPs (N = 91 at 66 loci, see **Supplementary Table 9**) were considered  
25 or their proxies ( $r^2 > 0.8$ ) if the index SNP was not available. The results are summarized in  
26 **Supplementary Table 14.**

### 27 **7.5 Advanced Study of Aortic Pathology (ASAP) dataset**

28 The ASAP study included five tissues: aorta adventitia ("AAdv"), aorta intima-media ("AMed"),  
29 mammary artery intima-media ("MMed"), heart ("H") and liver ("L"). The expression data were  
30 generated using the Affymetrix ST1.0 Exon array and genotyping was performed using the Illumina  
31 Human 610W- Quad Bead array<sup>35</sup>. The sample sizes ranged between 100 and 200 per data set, 86 of the

1 requested SNPs or proxies ( $r^2 > 0.8$ ) were available in the datasets. There were no probes on the arrays  
 2 for 9 genes (*c10orf22*, *DBH*, *EVX*, *FLJ32810*, *HOTTIP*, *LRRC10B*, *PLEKHG1*, and *TMEM133*), and data was  
 3 not provided for 4 of the loci (*NCAPH*, *ADAMTS9*, *RAPSN* and *ELVL3*). Imputation was performed using  
 4 Mach 1.0 and 1,000 Genomes as a reference. At loci with significant *cis*-eQTL signal(s) ( $P < 1 \times 10^{-4}$ ), the  
 5 most strongly associated *cis*-eQTL SNP (eSNP) for the corresponding transcript was identified. If the BP  
 6 SNP and the eSNP were the same or in high LD ( $r^2 > 0.8$ ) the BP SNP is defined as being an eSNP. For this  
 7 analysis, the *P* value of all directly genotyped SNPs within 200 Kb of the index SNP in question were  
 8 considered, which included around 100 proximal SNPs per locus. The results are summarized in  
 9 **Supplementary Table 14.**

## 10 7.6 Kidney

11 The dataset comprises 81 biopsies of normal kidney cortex tissue from transplantation donors  
 12 or nephrectomy patients<sup>36,37</sup>. The biopsies are drawn from two cohorts: Cohort 1 - gene expression data  
 13 from Rodwell et al. 2004<sup>36</sup>, and Cohort 2 - gene expression data from Wheeler et al.<sup>37,38</sup>.

14 All samples for each cohort were analyzed on Affymetrix U133 A&B set. Expression was  
 15 normalized within each cohort using dChip (perfect match probe sets only). Genotyping was performed  
 16 using Affymetrix 6.0 Genome-wide chips. SNP probe sets were called with Affymetrix GTC Software.

17 Perl and R scripts were used to link every SNP probe set to the nearest upstream and  
 18 downstream genes using the mapped RefSeq annotation from the Affymetrix annotation files (build 30).  
 19 In total, 29,782 unique RefSeq annotations map to 18,930 unique genes. To determine eQTLs, R scripts  
 20 were used to perform a linear multivariate regression within each cohort,

$$Y_{ij} = \beta_{0j} + \beta_{1j}g_{ij} + \beta_{2j}age_i + \beta_{3j}anc_i + \beta_{4j}s_i + \varepsilon_{ij}$$

21 where  $Y_{ij}$  is the  $\log_2$  normalized expression for the U133 probe set of SNP  $j$  in the kidney sample  $i$ ,  $g_{ij}$   
 22 denotes the respective genotype;  $age_i$ ,  $anc_i$  and  $s_i$  are the age, ancestry (European ancestry or other)  
 23 and sex (male or female) of the individual  $i$ , respectively; and  $\varepsilon_{ij}$  is a random error term. Only cortex  
 24 samples were used, so tissue was not a variable. Coefficients  $\beta$  (1 to 4) are estimated by least squares.

25 R and Bioconductor scripts were used to calculate a meta-analysis *P* value over both cohorts using a  
 26 Fisher's combined probability test. Only those eQTL combinations with a nominal  $P < 0.05$  (for genotype)  
 27 and an effect in the same direction in both cohorts were selected, yielding 9,989 eQTL combinations  
 28 (meta-analysis *P* value range:  $1.7 \times 10^{-2}$  to  $2.75 \times 10^{-35}$ ). The *P* values were then combined into one test  
 29 statistic

$$X^2 = -2 \sum_{i=1}^k \log_e(p_i)$$

1 which has an approximate chi-square distribution with 2k degrees of freedom.

2 The FDR was determined using R scripts by permutations, with labels swapped for the samples  
3 to preserve LD between SNPs. One thousand permutations on each cohort were seeded randomly using  
4 the Stanford BioX2 supercluster with a LSF batch system. A combined  $P$  value for each seed was  
5 calculated using Fisher's combined test (see previous paragraph). The FDR cutoff of  $Q < 0.025$  was  
6 iterated for the true dataset: At a cutoff  $P$  value of  $2.90 \times 10^{-05}$ , FDR is 0.025 (i.e. the average number of  
7 permuted eQTLs is 31 (peak at 28) which is 2.5% of the 1,220 true eQTLs for considered cutoff). The  
8 results are presented in **Supplementary Table 14**.

### 9 **7.7 Selected published eQTL datasets**

10 Index BP SNP and proxies ( $r^2 > 0.8$ ) were also searched against a collected database of  
11 expression SNP (eSNP) results. The reported eSNP results met criteria for statistical thresholds for  
12 association with gene transcript levels as described in the original papers. The non-blood cell tissue  
13 eQTLs searched included aortic endothelial cells<sup>39</sup>, left ventricle of the heart<sup>40</sup>, CD41+ monocytes<sup>41</sup> and  
14 the brain<sup>42</sup>. The results are presented in **Supplementary Table 14**.

## 15 **8 Enrichment of BP variants in experimentally annotated regulatory marks**

### 16 **8.1 Analysis of cell-specific DNase hypersensitivity sites (DHSs) using an OR method**

17 The overlap of Cardio-MetaboChip SNPs with DHSs was examined using publicly available data from the  
18 Epigenomics Roadmap Project and ENCODE, choosing different cutoffs of Cardio-MetaboChip  $P$  values.  
19 The DHS mappings were available for 123 mostly adult cells and tissues<sup>43</sup> (downloaded from  
20 <http://hgdownload.cse.ucsc.edu/goldenPath/hg19/encodeDCC/wgEncodeUwDnase/>). The DHS  
21 mappings were specified as both "narrow" and "broad" peaks, referring to reduction of the  
22 experimental data to peak calls at 0.1% and 1.0% FDR thresholds, respectively. Thus, the "narrow"  
23 peaks are largely nested within the "broad" peaks. Experimental replicates of the DHS mappings  
24 (typically duplicates) were also available for the majority of cells and tissues.

25 SNPs from the Cardio-MetaboChip genome-wide scan were first clumped in PLINK<sup>44</sup> in windows  
26 of 100kb and maximum  $r^2 = 0.1$  among LD relationships from the 1000 Genomes European data. Then,  
27 the resulting index SNPs at each  $P$  value threshold were tagged with  $r^2 = 0.8$  in windows of 100kb, again  
28 using LD relationships in the 1000 Genomes, restricted to SNPs with MAF > 1% and also present in the  
29 HapMap2 CEU population. A reference set of SNPs was constructed using the same clumping and  
30 tagging procedures applied to GWAS catalog SNPs (available at <http://www.genome.gov/gwastudies/>,  
31 accessed 3/13/2013)<sup>45</sup> with discovery  $P < 5 \times 10^{-8}$  in European populations. A small number of reference  
32 SNPs or their proxies overlapping with the BP SNPs or their proxies were excluded. After LD pruning and

1 exclusions, there were a total of 1,196 reference SNPs. For each cell type and  $P$  value threshold, the  
2 enrichment of SBP or DBP SNPs (or their LD proxies) mapping to DHSs was expressed as an odds ratio  
3 (OR) relative to the GWAS catalog reference SNPs (or their LD proxies), using logistic mixed effect  
4 models treating the experimental replicate peak determinations as random effects (glmer package in R).  
5 The significance of the enrichment ORs was derived from the significance of beta coefficients for the  
6 main effects in the mixed models (**Figure 3, Supplementary Table 16**).

## 7 **8.2 Analysis of tissue-specific enrichment of BP variants and H3K4me3 sites**

8 An analysis to test for significant cell-specific enrichment in the overlap of BP SNPs (or their proxies) with  
9 H3K4me3 sites was performed as described in Trynka et al, 2013<sup>46</sup>. The measure of overlap is a “score”  
10 that is constructed by dividing the height of an H3K4me3 ChIP signal in a particular cell by the distance  
11 between the nearest test SNP. The significance of the scores (i.e.  $P$  value) for all SNPs was determined  
12 by a permutation approach that compares the observed scores to scores of SNPs with similar properties  
13 to the test SNPs in terms of LD, proximity to genes, etc. The number of significant digits in the  $P$  value  
14 was determined by the number of permutations following the 10,000 iterations. Results are shown in  
15 **Supplementary Table 19**.

## 16 **8.3 Analysis of tissue-specific DHSs and chromatin states using Genomic Regulatory Elements and** 17 **GWAS Overlap Algorithm (GREGOR)**

### 18 *Data acquisition and pre-processing*

19 The DNase-seq ENCODE data for all available cell types were downloaded in the processed  
20 “narrowPeak” format. The local maxima of the tag density in broad, variable-sized “hotspot” regions of  
21 chromatin accessibility were thresholded at FDR 1% with peaks set to a fixed width of 150bp. Individual  
22 cell types were further grouped into 41 broad tissue categories  
23 (<http://genome.ucsc.edu/ENCODE/cellTypes.html>) by taking the union of DHSs for all related cell types  
24 and replicates. A set of BED files in hg19 assembly from the Integrative Analysis and original ENCODE  
25 analysis was also obtained. These data include uniformly processed datasets in 125 cell types generated  
26 by the "Open Chromatin" (Duke University) and University of Washington (UW) ENCODE groups. Data  
27 processed during the ENCODE Integrative Analysis were downloaded for available tissues. Otherwise,  
28 data from the original ENCODE analysis were obtained. The overlap of DHSs across different cell types  
29 was examined; we found that as expected, cell types derived from related tissues generally clustered  
30 together. The chromatin state segmentation by HMM generated from ENCODE/Broad in nine human  
31 cell types was also examined<sup>47</sup>.

### 32 *Selecting matched control SNPs for GWAS index SNPs*

1 For each GWAS locus, a set of matched control SNPs was selected based on three criteria: 1) number of  
2 variants in LD ( $r^2 > 0.7$ ;  $\pm 8$  variants), 2) MAF ( $\pm 1\%$ ), and 3) distance to nearest gene ( $\pm 11,655$  bp). To  
3 calculate the distance to the nearest gene, the distance to the 5' flanking gene (start and end position)  
4 and to the 3' flanking gene was calculated and the minimum of these 4 values was used. If the SNP fell  
5 within the transcribed region of a gene, the distance was 0.

#### 6 *Estimating the probability of observed and expected overlap between a regulatory feature and GWAS* 7 *locus*

8 The probability that a set of GWAS loci overlap with a regulatory feature more often than we expect by  
9 chance was performed using the following method. A GWAS locus was represented by the GWAS index  
10 SNP or a SNP in LD with the index SNP ( $r^2 > 0.7$ ). For each regulatory feature, the number of GWAS loci  
11 in which the physical overlap was observed with at least one experimentally defined genomic region of  
12 the feature was counted. The number of GWAS index SNPs in the *ith* matched control set that  
13 demonstrated a positional overlap with a given epigenomic feature, written as  $s_i$ , follows a binomial  
14 distribution with parameters  $n_i$  and  $p_i$ . The parameter  $n_i$  is equal to the number of index SNPs present  
15 in the *ith* control set. The second parameter  $p_i$  is calculated as the number of variants in the *ith* control  
16 set or their LD proxies that overlaps with the feature, divided by the total number of variants in the *ith*  
17 control set. If we assume there are  $r$  control sets in total, the number of index SNPs from all control sets  
18 that falls in a single feature is the sum of independent non-identical binomial random variables:

$$S = \sum_{i=1}^r s_i$$

19 In most cases, only one index variant was assigned to a matched control set, but there were some  
20 exceptions where more than one index SNP could match on the same 3 properties. An enrichment  $P$   
21 value for any given  $s$  as  $P(S \geq s)$  was estimated.  $P$  is the cumulative right tail probability based on the  
22 distribution of  $S$  and is calculated using a saddlepoint approximation method<sup>48</sup>. The results are shown in  
23 **Supplementary Tables 17-19** and **Supplementary Figure 8**. A collection of BP SNPs enriched in DHS sites  
24 in blood vessels is indicated in **Supplementary Table 20**.

#### 25 **8.4 Formaldehyde-assisted isolation of regulatory elements (FAIRE) analysis of BP variants in fine** 26 **mapping regions in lymphoblastoid cell lines**

27 FAIRE analysis was performed on a sample of 20 lymphoblastoid cell lines of European origin. All  
28 samples were genotyped using the Cardio-MetaboChip genotyping array, and BP SNPs and LD proxies ( $r^2$   
29  $> 0.8$ ) at the fine mapping loci ( $N = 24$ , see **Supplementary Table 23**) were assessed to identify  
30 heterozygous imbalance between non-treated and FAIRE-treated chromatin. A paired t-test was used to

1 compare the B allele frequency (BAF) arising from formaldehyde-fixed chromatin sheared by sonication  
2 and DNA purified to the BAF when the same chromatin sample underwent FAIRE to enrich for open  
3 chromatin. Three hundred and fifty-seven Cardio-MetaboChip BP SNPs were directly genotyped across  
4 the fine mapping regions. The Bonferroni-corrected threshold of significance is  $P < 0.0001$  ( $0.05/357$ ).  
5 The results for SNPs with  $P < 0.05$  are reported in **Supplementary Table 23**. FAIRE results were not  
6 available for 54 SNPs: the missing data was due to genotype failure or not having >3 heterozygous  
7 individuals for statistical analysis. Therefore there are no results for three lower frequency BP loci  
8 (*SLC39A8*, *CYP17A1-NT5C2* and *GNAS-EDN3*) and for the second signal at the following loci: *MTHFR*-  
9 *NPPB* (rs2272803), *MECOM* (rs2242338) and *HFE* rs1800562).

## 10 **9 Pathway analyses**

### 11 **9.1 MAGENTA**

12 MAGENTA tests for enrichment of significant gene-wide  $P$  values in gene sets from a  
13 precompiled library derived from GO, KEGG, PATHTER, REACTOME, INGENUITY, and BIOCARTA and was  
14 performed as described by Segré et al, 2010<sup>49</sup>. Enrichment of significant gene-wide  $P$  values in gene sets  
15 is assessed by 1) using LD and distance criteria to define the span of each gene, 2) selecting the smallest  
16  $P$  value among SNPs mapping to the gene span, and 3) adjusting this  $P$  value using a regression method  
17 that accounts for the number of SNPs, the LD, etc. In the second step, MAGENTA examines the  
18 distribution of these adjusted  $P$  values and defines thresholds for the 75%-ile and the 95%-ile. In the  
19 third step, MAGENTA calculates an enrichment for each gene set by comparing the number of genes in  
20 the gene set with  $P$  value less than either the 75th or 95th %ile to the number of genes in the gene set  
21 with  $P$  value greater than either the 75th or 95th %ile, and then comparing this quotient to the same  
22 quotient among genes not in the gene set. This gene-set quotient is assigned a  $P$  value based on  
23 reference to a hypergeometric distribution. The results based on our analyses are indicated in  
24 **Supplementary Table 21**.

### 25 **9.2 Data-driven Expression Prioritized Integration for Complex Traits (DEPICT)**

26 We applied the DEPICT<sup>50</sup> separately on genome-wide significant loci from the overall blood  
27 pressure (BP) Cardio-MetaboChip analysis including published blood pressure loci (see **Supplementary**  
28 **Table 22**). SNPs at the *HFE* and *BAT2-BAT5* loci (rs1799945, rs1800562, rs2187668, rs805303,  
29 rs9268977) could not be mapped. We also included associated loci ( $P < 1 \times 10^{-5}$ ) from the Cardio-  
30 MetaboChip stage 4 combined meta-analyses of SBP and the DBP. DEPICT assigned genes to associated  
31 regions if they overlapped or resided within associated LD blocks defined  $r^2 > 0.5$  to a given associated  
32 SNP. After merging overlapping regions and discarding regions that mapped within the extended major

1 histocompatibility complex locus (we excluded chromosome 6, 20-40Mb), we were left with 76, 120,  
2 and 131 non-overlapping regions that covered 226, 292, and 329 genes for BP, SBP and DBP  
3 respectively. The gene counts differed from the loci used for manual lookups because DEPICT only  
4 included genes which passed quality control on Affymetrix gene expression microarrays (platforms U133  
5 Plus 2.0, Human Genome U133 A, Mouse 430 2.0, and Rat 230 2.0). We used DEPICT to test enrichment  
6 at these regions for a total of 14,461 reconstituted gene sets, and for 209 tissue and cell type  
7 annotations. DEPICT relies on random loci to adjust for biases such as gene length and expression  
8 properties. In this work, we restricted the random loci construction to autosomal SNPs that were  
9 present on the Cardio-MetaboChip as well as in the 1000 Genomes data, which resulted in a total of  
10 120,972 SNPs that covered >11,800 genes. To ensure that DEPICT worked well for the Cardio-  
11 MetaboChip-based analysis we performed 100 meta-analyses that were limited to the 120,972 Cardio-  
12 MetaboChip SNPs that passed quality control. Each simulated study comprised ~65 independent  
13 regions, which were subjected to DEPICT. Plotting of the gene set enrichment and tissue/cell type  
14 enrichment *P* values did not indicate any elevated type 1 error. We did, however, observe a slightly  
15 elevated type 1 error (data not shown) for the gene prioritization analyses and decided not to include  
16 this part of the DEPICT analysis in the results presented here. DEPICT was run using default settings, that  
17 is using 500 permutations for bias adjustment, 50 replications for false discovery rate estimation,  
18 normalized expression data from 77,840 Affymetrix microarrays for gene set reconstitution<sup>51</sup>, assessing  
19 14,461 reconstituted gene sets for enrichment (5,984 protein complexes that were derived from  
20 169,810 high-confidence experimentally-derived protein-protein interactions<sup>52</sup>; 2,473 phenotypic gene  
21 sets derived from 211,882 gene-phenotype pairs from the Mouse Genetics Initiative<sup>53</sup>; 737 Reactome  
22 database pathways<sup>54</sup>; 184 KEGG database pathways<sup>55</sup>; and 5,083 Gene Ontology database terms<sup>56</sup>), and  
23 testing 209 tissue/cell types assembled from 37,427 Affymetrix U133 Plus 2.0 Array samples for  
24 enrichment in tissue/cell type expression.

## 25 **10 Non-European meta-analysis**

26 To assess the association of the 66 significant loci from the European ancestry meta-analysis in non-  
27 European ancestries, we obtained lookup results for the 66 index SNPs for participants of South-Asian  
28 ancestry (8 datasets, total N = 20,875), East-Asian ancestry (5 datasets, total N = 9,637), and African- and  
29 African-American ancestry (6 datasets, total N = 33,909). The association analyses were all conducted  
30 with the same covariates (age, age<sup>2</sup>, sex, BMI) and treatment correction (+15/10 mm Hg in the presence  
31 of any hypertensive medication) as the association analyses for the discovery effort in Europeans.  
32 Quality control was conducted for each dataset, including a verification of the alignment of the coded



1 allele frequencies (**Supplementary Figure 9**). The full per-SNP meta-analysis results are given in  
2 **Supplementary Table 24**, including a trans-ethnic non-European meta-analysis. All meta-analyses were  
3 conducted using custom scripts in R statistical computing language<sup>19</sup>. The heterogeneity statistics were  
4 calculated using the software package GWAMA<sup>57</sup>.

## 5 **11 Genetic risk score and cardiovascular outcomes**

6 In order to estimate the joint effect of the 66 BP SNPs on cardiovascular outcomes and other risk  
7 factors, we used a 66 SNP risk score, weighted by the effect size of SBP and DBP in the stage 4 combined  
8 meta-analysis for two separate risk scores (SBP-risk score and DBP-risk score). Individual-level data on  
9 cardiovascular outcomes were not available in large sample sizes. However, summary statistics from  
10 SNP-phenotype association studies can be used reliably to estimate the effect of predictor SNPs on the  
11 outcome phenotype as we have previously established<sup>1,58</sup>. The gtx package<sup>59</sup> for the R statistical  
12 programming language was used to estimate the effect of the SNP-risk score on the response variable in  
13 a regression model. The effect sizes are expressed as incremental change in the phenotype for  
14 quantitative traits and natural logarithm of the OR for binary traits, per 1 mmHg predicted increase in  
15 SBP or DBP (**Table 3**). Some SNPs may be related to more than one risk factor for cardiovascular disease  
16 and such pleiotropic effects could potentially lead to increased or reduced association on the  
17 cardiovascular outcome than the BP effect would be expected to cause. Such confounding by pleiotropy  
18 would be expected to lead to a decrease in the goodness of fit of the regression model described above.  
19 We tested each model for such homogeneity of outcome/BP effects as implemented in the gtx package  
20 for R statistical computing language<sup>59</sup> and performed sensitivity analyses to determine whether removal  
21 of outlier predictor SNPs would alter the association of BP SNPs in aggregate to each cardiovascular  
22 outcome. We proceeded by iterative removal of the most extreme outlier SNP (proportional distance of  
23 the outcome/BP effect from the mean across all SNPs) and calculation of a heterogeneity *P* value until  
24 the deviation from homogeneity test is associated at a significance level of no less than 0.0028  
25 ( $\sim 0.05/\text{number of phenotypes}$ ), see results in **Table 3**. The per-SNP results for each outcome are  
26 summarized in **Supplementary Table 25**. A graphical presentation of the relationship between predictor  
27 and response variable, before and after outlier removal is given in **Supplementary Figures 10**.

## 28 **12 Literature review for genes at the newly discovered loci**

29 Recognizing that the most significantly associated SNP at a locus may not be located in the causal gene  
30 and that the functional consequences of a SNP often extends beyond 100kb, we conducted a literature  
31 review of genes in extended regions around newly discovered BP index SNPs: The genes for this

1 extensive review were identified by DEPICT (see **Section 9.2, and Supplementary Table 27**). The DEPICT  
2 method assigns genes to associated regions if they overlap or reside within associated LD blocks defined  
3 by linkage disequilibrium  $r^2 > 0.5$  to an index SNP. A literature review of candidate genes identified by  
4 this method was manually performed, and summary paragraphs are provided. Using the DEPICT  
5 method, two loci can be categorized as intergenic and not containing any genes in the genomic interval  
6 considered; for 10 of the loci there was only one gene at the locus (*HIVEP3*, *FGD5*, *ARHGAP24*, *TRIM36*,  
7 *CSNK1G3*, *ZC3HC1*, *LLRC10B*, *PDE3A*, *SETBP1* and *INSR*); for 7 loci there were multiple genes in the  
8 interval, a select few of these were considered for review (*DBH*, *SIK1*, *MYCBP3*).

### 9 **12.1 *FDG5***

10 The *FGD5* gene encodes the FYVE Rho guanine exchange factor and pleckstrin homology domain  
11 containing 5 protein; a member of a larger family of FGD proteins characterised by a combination of  
12 highly conserved homology domains (eg Dbl, FYVE and PH). As guanine exchange factor (GEF) proteins,  
13 they act as a molecular switch facilitating GDP to GTP exchange in small GTPases such as Cdc42, RhoA,  
14 and Rac1. *FGD5* is a unique member of the family with its specialized tissue distribution at mRNA and  
15 protein levels showing enrichment in human endothelial cells, mouse aorta, and carotid arteries<sup>60</sup>. *FGD5*  
16 is shown to be of importance during various stages of mouse and zebrafish vasculature development. *In*  
17 *vitro* experiments in mouse and human cell lines implicate *FGD5* in angiogenesis and vasculature  
18 remodelling, modulated by VEGF signalling and involving downstream Cdc42 activation<sup>61</sup>.

### 19 **12.2 *ZC3HC1***

20 The *ZC3HC1* gene encodes Zinc-finger C3HC-type protein 1, also known as Nuclear-Interacting  
21 Partner of ALK (NIPA). It is broadly expressed in human tissues, with highest expression in heart,  
22 skeletal muscle and testis<sup>62</sup>. The gene product is an F-box protein that is an interchangeable part of the  
23 SCF ubiquitin E3 ligase complex and, as such, is function defining. Phosphorylated NIPA targets cyclin B  
24 for SCF-dependent degradation. This control of cyclin B accumulation and degradation is one of key  
25 events in mitotic cell cycle progression and apoptotic events<sup>63</sup>. Recently, the same non-synonymous  
26 variant (rs11556924) in *ZC3HC1* has been reported to be associated with coronary disease<sup>34</sup>

### 27 **12.3 *DBH***

28 Dopamine  $\beta$ -hydroxylase (*DBH*) catalyzes the conversion of dopamine to norepinephrine, a key  
29 neurotransmitter in maintaining heart rate and blood pressure. *DBH* is co-released with norepinephrine  
30 from noradrenergic nerve endings<sup>64</sup>. The resulting *DBH* activity is highly correlated with this enzyme's  
31 levels in the plasma and cerebrospinal fluid in humans and mice, as confirmed by QTL<sup>65</sup> and GWAS<sup>66</sup>

1 analyses. Genetic variation in *DBH* has been associated with hypertension and cardiovascular disease. To  
2 date, three SNPs in the *DBH* promoter region (rs161115<sup>67</sup>, rs1989787<sup>68</sup>, rs1076150) have been  
3 functionally characterized; all of these influence the binding motifs of transcription factors, regulating  
4 *DBH* gene expression. Furthermore, these variants have been shown to have additive effects, giving rise  
5 to a spectrum of dopamine beta hydroxylase traits<sup>66</sup>.

#### 6 **12.4 *INSR***

7 The *INSR* (insulin receptor, IR) gene encodes a tyrosine kinase receptor; it mediates transduction  
8 of signals induced by pleiotropic endocrines, insulin and insulin-like growth factor 1 (IGF1), into the  
9 cellular *milieu*. This occurs via receptor homodimerization (IR-IR) and/or heterodimerization (IR-IGFR)  
10 and subsequent receptor autophosphorylation. Impaired insulin signaling is most commonly associated  
11 with diabetes mellitus, with most disease incidence attributed to IR malfunction. Impaired insulin  
12 signaling is identified as one of the key contributors to metabolic syndrome, a collective term given to a  
13 pathophysiological state including obesity, insulin resistance, hypertension and dyslipidemia, and an  
14 ultimate risk factor for cardiovascular disease<sup>69</sup>. Large-scale meta-analysis using the IBC (IMAT-Broad-  
15 CARE) array has identified a polymorphism in *INSR* (rs8112883) associated with altered plasma  
16 triglyceride levels, defining a novel gene locus for cardiovascular risk<sup>70</sup>. Insulin's tissue-specific effects on  
17 vascular endothelium<sup>71</sup> and smooth muscle<sup>72</sup> as well as cardiomyocytes<sup>73</sup> are well documented in  
18 modulating cardiovascular phenotypes, but the context-specific complexity of phenotypes in *in vitro* and  
19 *in vivo* IR model systems suggests involvement of many post-receptor modulators<sup>74</sup>.

#### 20 **12.5 *HIVEP3***

21 *HIVEP3*, also known as *SHN3*, encodes for human immunodeficiency virus type 1 enhancer-  
22 binding protein 3, or Schnurri 3. In general, proteins of this family (*HIVEP*/*SHN*) bind to  $\kappa$ B enhancer  
23 elements modulating gene expression in a *rel*/*NF $\kappa$ B*-independent manner<sup>75</sup>. They are relatively large  
24 proteins containing zinc-fingers. *HIVEP3* was initially described to undergo alternate splicing, leading to  
25 functional diversity of its isoforms<sup>76</sup>. Today, Schnurri 3 is best recognised for its role in adult osteoblast  
26 function and bone mass regulation<sup>77</sup> via involvement of Wnt and ERK pathways<sup>78</sup>. Importantly, through  
27 use of high-throughput transcript profiling in VSMCs, *HIVEP3* was identified as one of the novel  
28 transcripts to respond to Ang-II stimulus, implicating it in the maintenance of BP homeostasis<sup>79</sup>.

#### 29 **12.6 *TRIM36***

30 The product of *TRIM36*, as well as the other members of this 71 gene family, contains a  
31 tripartite motif (TRIM) of the following domains: RING finger, B-box zinc finger, and C-terminal coil-coil.

1 It is expressed selectively in testis, prostate and brain as well as, to a lesser extent, in lung, kidney and  
2 heart<sup>80,81</sup>. TRIM36 is reported to be involved in post-translational protein modification known as  
3 sumoylation, aiding in transfer of small ubiquitin-related modifier 1 (SUMO1) from E2 ligase to a  
4 substrate, ultimately regulating processes such as cell cycle progression, cytoplasm-nucleus trafficking,  
5 and apoptosis<sup>81,82</sup>. TRIM36 expression is induced by actions of androgen receptor binding to intronic  
6 motifs within this gene, making it a candidate oncogene in progression of prostate cancer<sup>83</sup>.

### 7 **12.7 CSNK1G3**

8 *CSNK1G3* encodes for casein kinase 1 (CK 1/CK I) isoform  $\gamma$  3. Kinases from this family are  
9 thought to be responsible for phosphorylation of 10% of the whole known eukaryotic  
10 phosphoproteome. CK1 serine/threonine kinases are ubiquitously expressed, monomeric proteins which  
11 are described as “constitutively active” for priming activity of other phosphoproteins<sup>84</sup>.

### 12 **12.8 SETBP1**

13 *SETBP1* encodes the translocation breakpoint-encoded protein (SET) binding protein 1, which is  
14 ubiquitously expressed in human tissues. SET is a nuclear phosphoprotein characterized by its inhibitory  
15 effect on a nuclear protein phosphatase 2A (PP2A), a regulator of cell proliferation, differentiation and  
16 transformation, and its close interaction with leukemia causing oncogenes. SET and SETBP were shown  
17 to form a complex and are postulated to be a part of multimeric protein aggregates<sup>85</sup>. Exome  
18 sequencing approaches have identified *de novo* mutations in this gene’s SKI homology domain as an  
19 underlying cause for Schinzel-Giedion syndrome<sup>86</sup>, as well as secondary mutations responsible for  
20 progression of myeloid leukemias. Although molecular mechanisms of SETBP1 function are still poorly  
21 understood, and are likely tumor-specific, observed mutations are believed to influence SETBP1  
22 ubiquitination and its subsequent degradation and/or the proto-oncogene’s interaction with homeobox  
23 genes (*HOXA9*, *HOXA10*)<sup>87</sup>.

### 24 **12.9 SIK1**

25 The *SIK1* gene encodes a serine-threonine protein kinase family member known as the salt-  
26 inducible kinase isoform 1, further classified into the AMP-activated protein kinase (AMPK) subfamily.  
27 The SIK1 protein is ubiquitously expressed in many human tissues. Several kinase domains have been  
28 identified within the protein including: a cAMP-dependent domain<sup>88</sup>, a calmodulin domain, a master  
29 regulator LKB1 domain (Thr-182)<sup>89</sup>, and an autophosphorylation domain (Ser-186)<sup>90</sup>. The protein is best  
30 characterised as part of a signalling network involved in control of intracellular sodium homeostasis via  
31 direct interaction with the sodium-potassium ATPase, the key cellular housekeeper of salt and water

1 balance<sup>91</sup>. Angiotensin II is postulated to modulate SIK1 and, in turn, the sodium-potassium ATPase,  
2 most likely through regulation of its shuttling between the endosomal and plasma membrane pools<sup>92</sup>. In  
3 this tissue, blocking SIK1 activity prevents the hypertensive cell phenotype induced by hypertension-  
4 linked non-synonymous polymorphisms in  $\alpha$ -adducin gene<sup>93</sup>. Furthermore, in the adrenal glands, similar  
5 mechanisms are thought to be involved in the angiotensin II regulation of CYP11B2, another BP gene  
6 candidate, and ultimately aldosterone secretion. However, the molecular identity of SIK1 in the adrenals  
7 has not been empirically confirmed<sup>92</sup>. In cardiac tissue, absence of SIK1 has been shown to be impair  
8 mouse cardiomyogenesis, suggesting this gene's involvement in cell cycle regulation and cellular  
9 differentiation<sup>94</sup>.

#### 10 **12.10 MYBPC3**

11 The *MYBPC3* gene encodes the cardiac myosin-binding protein C (MyBP-C), and mutations in  
12 *MYBPC3* are associated with familial hypertrophic cardiomyopathy (FHC or HCM), an autosomal  
13 dominant disease which is the most common cause of sudden death in young<sup>95</sup>. The MyBP-C protein  
14 binds myosin and titin within the thick filaments of the myocardial sarcomere, ultimately modulating  
15 cardiac muscle contractility. Its expression is strictly confined to heart tissue<sup>96</sup>. Two early independent  
16 genetic studies of unrelated families have identified mutations which produce aberrant MyBP-C protein,  
17 as a result of alternative splicing and gene duplication events<sup>95,97</sup>. To date, over 200 mutations in this  
18 gene alone have been associated with cardiomyopathy and heart failure, explaining 30-35% of its  
19 genetic component<sup>96</sup>. Animal model studies have also shown that expression of MyBP-C is important for  
20 determining diastolic function of the heart, independent of hypertrophy<sup>98</sup>.

21

## 1 **13 Supplementary table list and legends**

2 The following supplementary tables are in a supplementary Excel file named “03\_NG-  
3 **A41405R\_SupTables\_final.xlsx**”. The legends of the supplementary tables are below.

4 **Supplementary Table 1:** Individual cohort study information and blood pressure measurement methods.

5 **Supplementary Table 2:** Genotyping methods.

6 **Supplementary Table 3:** Data-type contribution and participant characteristics.

7 **Supplementary Table 4:** Meta-analysis stage 4 results

8 **Supplementary Table 5:** UK Biobank validation

9 **Supplementary Table 6:** Loci identified by GCTA with multiple signals of association.

10 **Supplementary Table 7:** All SNPs selected by GCTA as independently associated with SBP.

11 **Supplementary Table 8:** All SNPs selected by GCTA as independently associated with DBP.

12 **Supplementary Table 9:** SNPs at 66 genome-wide significant CM loci or in the literature for conditional  
13 analysis in WGHS, annotation in eSNP analyses or inclusion in pathway analyses.

14 **Supplementary Table 10:** Conditional analysis using the WGHS dataset.

15 **Supplementary Table 11:** Summary of Cardio-MetaboChip BP fine mapping regions.

16 **Supplementary Table 12:** Ninety-nine percent credible intervals at Cardio-MetaboChip BP fine mapping  
17 regions.

18 **Supplementary Table 13:** Ninety-nine percent credible causal SNPs at Cardio-MetaboChip BP fine  
19 mapping regions.

20 **Supplementary Table 14:** eSNP analysis for cell types other than whole blood.

21 **Supplementary Table 15:** eSNP analysis for whole blood.

22 **Supplementary Table 16:** Analysis of enrichment of DNase-hypersensitive sites among the BP loci, by cell  
23 type.

24 **Supplementary Table 17:** Tissue categorization for DNase-hypersensitive site analyses.

25 **Supplementary Table 18:** Analysis of enrichment of DNase-hypersensitive sites among the BP loci,  
26 grouping cell types by tissue.

27 **Supplementary Table 19:** Analysis of enrichment of methylation sites among the BP loci.

28 **Supplementary Table 20:** BP SNPs enriched in DHS sites in blood vessels.

29 **Supplementary Table 21:** MAGENTA analysis.

30 **Supplementary Table 22:** DEPICT analysis.

31 **Supplementary Table 23:** FAIRE analysis.

32 **Supplementary Table 24:** Non-European meta-analysis.

33 **Supplementary Table 25:** Detailed results of risk score analyses for each SNP.

34 **Supplementary Table 26:** Genetic BP risk-score analysis applied to related cardiovascular phenotypes.

35 **Supplementary Table 27:** Genes at new BP loci using DEPICT.

36

37 **Supplementary Table 1:** Individual cohort study information and blood pressure measurement  
38 methods.

39 All participating studies are listed in alphabetical order. Information is provided on the full name  
40 of the study, the parent study name (if the study is part of a consortium of studies), ethnicity and study  
41 design. Key characteristics of the BP values used in our analyses, including the device used for BP  
42 measurement, the number of BP values averaged when more than one value was available, and the  
43 position of the patient when taking the BP measurement is indicated. A published reference and/or a

1 website is indicated when available. CAD = coronary artery disease, EUR = European ancestry, SAS =  
2 South Asian ancestry, EAS = East Asian ancestry, AFR = African ancestry, MI = myocardial infarction, NA =  
3 not available.

4 **Supplementary Table 2:** Genotyping methods.

5 Information on genotyping and imputation methods for both Cardio-MetaboChip and imputed  
6 datasets are indicated. The platform, calling algorithm, the number of SNPs used for either discovery  
7 analysis or for a lookup is indicated. Filtering parameters before imputation for the studies supplying  
8 imputed genotypes are provided including the cutoffs for sample call rate, SNP call rate, Hardy-  
9 Weinberg equilibrium (HWE), minor allele frequency (MAF) and others used. For studies using imputed  
10 (imput.) genotypes, the number of SNPs used for imputation, the software and reference panel used for  
11 imputation, and the filtering parameters of imputed genotypes are provided.

12 **Supplementary Table 3:** Data-type contribution and participant characteristics.

13 Demographic data including BP are indicated for all studies (European-, South-Asian, East-Asian, and  
14 African-Ancestry). The general demographic information includes the number of participants analyzed  
15 (N) and genotyping platform used (CM indicates Cardio-MetaboChip, and ICBP 2011 indicates if this  
16 dataset was included in the published ICBP-GWAS dataset). The basic description includes the  
17 percentage of categorical values and the mean and SD of continuous measurements. The BP values  
18 presented are after applying the treatment correction of +15/10mmHg to individuals on any anti-  
19 hypertensive medication (see Supplemental Text). The standard deviation (SD) of the residual from a  
20 linear regression on age, age<sup>2</sup>, sex, and BMI are indicated for SBP and DBP. The percentage of  
21 participants on any anti-hypertensive medication and the percentage of participants with hypertension  
22 defined as SBP $\geq$ 140mmHg or DBP $\geq$ 90mmHg or presence of  $\geq$ 1 anti-hypertensive medication (% HTN) are  
23 also indicated.

24 **Supplementary Table 4:** Meta-analysis stage 4 results.

25 The meta-analysis results of stage 4 is shown in this table, analogous to Table 1 of the main text.

26 **Supplementary Table 5:** UK Biobank validation.

27 The results of the 18 SNP lookup in the UK Biobank are shown here, analogous to Table 1 of the main  
28 text.

29 **Supplementary Table 6:** Loci identified by GCTA with multiple signals of association.

1 Loci for which the GCTA-COJO software identified multiple association signals for SBP and/or DBP using  
2 the GoDARTS study as a reference dataset at a threshold  $P < 5 \times 10^{-8}$ . The SNPs selected and their  
3 summary statistics from the single-SNP and approximate conditional analyses are reported. For loci  
4 where both traits are observed with multiple association signals, if the same SNPs are selected, these  
5 are listed in the table. When GCTA-COJO selects different SNPs for each of the traits, but they are  
6 proxies ( $r^2 > 0.8$ ), results for the signals with the lowest  $P$  value are reported. Otherwise, all SNPs selected  
7 for SBP and DBP can be found in the table with their summary statistics only for the trait for which they  
8 were selected. The lowest  $P$  values in the joint analysis are shown in bold. a: proxy SNP was selected for  
9 DBP in the joint analysis. b: proxy SNP was selected for SBP in the joint analysis.

10 **Supplementary Table 7 and Supplementary Table 8:** ALL SNPs selected by GCTA as independently  
11 associated with BP.

12 The results based on SBP results are in Supplementary Table 7 and the results based on DBP are in  
13 Supplementary Table 8. A threshold of  $P < 5 \times 10^{-8}$  was used and we utilized GoDARTS (primary analysis)  
14 and WTCCC1-T2D/58BC (secondary analysis) as reference datasets.

15 All SNPs for which the GCTA-COJO software identifies independent association at  $P < 5 \times 10^{-8}$ . The coded  
16 allele (CA) and non-coded allele (NCA), the total sample size (N) are indicated for the analyses using  
17 GoDARTS and WTCCC1-T2D/58BC as a reference along with their association statistics. "LD  $r$ " denotes  
18 the correlation coefficient,  $r$ , in the reference dataset between a SNP and the one following in the table.  
19 Given that GCTA-COJO assumes the LD between SNPs more than 10 Mb away or on different  
20 chromosomes is zero, the correlation coefficient is omitted in the table for those SNPs. The final  
21 columns indicate whether the two analyses using the different reference datasets are in agreement and  
22 the  $r^2$  between the two SNPs if different SNPs were selected. The yellow highlight indicates that a SNP  
23 was identified in one analysis, but not in the other.

24 **Supplementary Table 9:** List of SNPs at genome-wide significant Cardio-MetaboChip loci for secondary  
25 analyses.

26 Information is provided on SNPs selected for conditional analysis in WGHS, for annotation and inclusion  
27 in eSNP and DNase Hypersensitivity analyses, and for pathway analyses. CM1 = indicates associated SNP  
28 in the GCTA analyses; CM2 = indicates a second associated SNP at a locus in the GCTA analysis; NOT IN  
29 LIT = unpublished, not reported in the literature. The "notes" column indicates the provenance of the  
30 selected SNPs and references. Ho et al (2010)<sup>99</sup>; Padmanabhan et al (2010)<sup>100</sup>, Takeuchi et al (2010)<sup>101</sup>;  
31 Ehret et al (2011)<sup>1</sup>; Johnson et al (2011a)<sup>102</sup>; Johnson et al (2011b)<sup>103</sup>; Kato et al (2011)<sup>104</sup>; Salvi et al  
32 (2011)<sup>105</sup>; Wain et al (2011)<sup>106</sup>; Ganesh et al (2013)<sup>107</sup>; Kato et al (2015)<sup>108</sup>; WGHS= Women's Genome



1 Health Study; GCTA\_CM (using GWAS+CM) status refers to the results from GCTA analysis which are  
2 presented in full in **Supplementary Tables 6-8**.

3 **Supplementary Table 10:** Conditional analysis using the WGHS dataset.

4 Conditional association analyses were conducted in the WGHS by linear regression analyses using more  
5 than one predictor SNP at the same time. Each sub-table shows the association statistics for single  
6 association analyses and the conditional analyses for each locus where there was more than one signal  
7 identified in the GCTA analyses or based on comparison to the literature and reference to linkage  
8 disequilibrium patterns in reference samples. The BP trait is indicated for the genome-wide significant  
9 SNP. The highlighted bottom line of each sub-table shows our interpretation of the conditional analysis  
10 results, taking into account the conditional analysis results using GCTA-COJO software. All BP loci  
11 indicated in **Supplementary Table 6** were examined in the analysis, although only results for loci that  
12 were informative in the WGHS are presented for space reasons. Uninformative results are those in  
13 which no more than one SNP was nominally significant ( $P < 0.05$ ) in a single or joint model.

14 **Supplementary Table 11:** Summary of Cardio-MetaboChip BP fine mapping regions.

15 The genomic positions (hg 19) of the Cardio-MetaboChip fine-mapping regions overlapping with SBP or  
16 DBP loci are shown. Consortia indicates which consortium has submitted the fine-mapping region at  
17 Cardio-MetaboChip design, trait/type/rank indicates the trait used for the analyses, the type of fine-  
18 mapping region (locus fine-mapping = LFM, signal fine-mapping - SFM) and its rank as indicated by  
19 Voight et al<sup>13</sup>. Start and End regions indicates the genomic region. Locus with multiple signals indicates  
20 whether there are multiple signals at the locus, based on GCTA or WGHS conditional analyses in this  
21 study. The traits (SBP or DBP) that reached genome-wide significance in our analyses are indicated, the  
22 main trait provides the trait with the most significant association, and the index SNPs of the  
23 independent signals observed in our results at the locus (main trait index SNP). SNPs that are not  
24 present in the FM interval are marked with a "\*".

25 **Supplementary Table 12:** Ninety-nine percent credible intervals at Cardio-MetaboChip BP fine-mapping  
26 regions.

27 The 99% credible intervals were estimated in the Cardio-MetaboChip (MC) fine-mapping regions  
28 reaching genome-wide significance in our association analyses. Three sets of results are provided: A) the  
29 GWAS+MC meta-analyses (entire dataset), B) in the MC-only meta-analyses, and C) overlapping SNPs  
30 from both analyses (last columns). We have indicated whether the locus contains multiple signals, the  
31 identity of the index SNP, the conditioning SNP and their position. High resolution fine mapping is an

1 arbitrary metric of fine mapping success, defined as a number of 99% credible SNPs for SBP and DBP  $\leq 5$   
2 and a reduction of the total number of SNPs in the credible interval by a factor 5 or more for SBP and  
3 DBP in the GWAS+MC analysis. The number of SNPs in the FM region that account for 99% of the  
4 posterior probability are indicated (#SNPs) in relation to the total number of SNPs in the fine-mapping  
5 region (#SNPs in fine-map.). The distance (kb) covered by the set of SNPs in the FM region that account  
6 for 99% of the posterior probability is indicated (distance). The start and end position denote the  
7 starting and end base position of the interval covered by the set of SNPs in the FM region that account  
8 for 99% of the posterior probability. For FM regions where a larger refinement was achieved (number of  
9 credible causal SNPs threshold arbitrarily set to  $<20$ ; FM regions identified with NA otherwise), the list of  
10 missense/synonymous credible causal SNPs is given. The number of SNPs overlapping between the  
11 credible sets for GWAS+CM and CM-only are indicated in the last two columns (#overl. SNPs). The  
12 number of SNPs in the FM regions may vary between traits due to slight differences in the datasets  
13 included for each analysis as the results of the QC. ND = conditional analysis not performed for locus as  
14 second signal not present in the fine-mapping region. All coordinates are on b37.

15 **Supplementary Table 13:** Ninety-nine percent credible causal SNPs at Cardio-MetaboChip BP fine  
16 mapping regions.

17 The rs numbers of all SNPs that account for 99% of the posterior probability within the 99% credible  
18 intervals (within the fine-mapping regions- cf. **Supplementary Table 11**) are listed for both BP traits (SBP  
19 and DBP) and for the two analyses (GWAS + CM = all data or CM only). The last two columns  
20 (GWAS+CM vs CM- only) indicate the overlapping SNPs between both sets of analyses per trait.

21 **Supplementary Table 14:** eSNP analysis for cell types other than whole blood.

22 For the experiments including: macrophages, monocytes, skin, lymphoblastoid cell lines (LCLs), fat,  
23 blood vessels, heart and liver the results presented are the BP SNPs or a proxy SNP ( $r^2 > 0.8$ ) if the index  
24 BP SNP was not directly genotyped which were significantly associated with expression of a *cis* transcript  
25 ( $P < 1 \times 10^{-4}$ ), and the most significantly associated eSNP for that transcript was identical or in high LD  
26 with the BP SNP ( $r^2 > 0.8$ ). Abbreviations: aorta adventitia = AAdv, aorta intima-media = AMed, mammary  
27 artery intima-media = MMed, heart = H and liver = L. For the experiment on kidney tissue, the results of  
28 a Fisher's combined test are presented at an FDR of  $<0.025$ . For the experiment with aortic endothelial  
29 cells the results with  $-\log P < 1 \times 10^{-6}$  (Bonferroni corrected  $\alpha < 0.05$ ) are presented. For the  
30 experiments on CD41+ monocytes, and brain tissue, the results met criteria for statistical thresholds for  
31 association with gene transcript levels as described in the original papers. The experiment is the tissues  
32 tested, and the coded allele (CA), non-coded allele (NCA), coded allele frequency (CAF) is provided.

1 Imputation quality (imput. qual.) is provided if available. Full details of the analysis per tissue and cell  
2 type are provided in **Section 7**.

3 **Supplementary Table 15:** eSNP analysis for whole blood.

4 Association results are shown for the index BP SNP to any transcript within 1 Mb achieving FDR < 0.05.  
5 The best eSNP for that transcript in whole blood is identified and then the association results for the  
6 index BP SNP are shown after adjustment for the best eSNP for that transcript (BP SNP conditional P-  
7 value). "BP SNP" denotes Cardio-MetaboChip index or proxy-SNP. "Input." denotes imputation quality  $r^2$ ,  
8 the effect (beta) for both the BP SNP and eSNP effects are also provided.

9 **Supplementary Table 16:** Analysis of enrichment of DNase-hypersensitive sites among the BP loci, by  
10 cell type.

11 The odds ratios for each  $P$  value cutoff among the CM BP association data are listed for each cell type.  
12 The endothelial cell types are listed first, followed by all other cell types sorted alphabetically. The SNPs  
13 from the SBP or DBP discovery genome-wide scans meeting a series of  $P$  value thresholds in the range  
14  $10^{-4}$ - $10^{-16}$  were clumped and tagged as described above and then compared to GWAS catalog SNPs for  
15 enrichment in narrow or broad DHS peaks for each of 123 cell types.

16 **Supplementary Table 17:** Tissue categorization for DNase-hypersensitive site analyses.

17 Grouping categorization for related tissues in the DNase-hypersensitive site analysis. Two different  
18 tissue categorizations were available (Broad tissue category and ENCODE tissue category). The published  
19 region definitions listed were used (see **Section 8**; the name is the concatenation of the experiment  
20 name and the experiment definition).

21 **Supplementary Table 18:** Analysis of enrichment of DNase-hypersensitive sites among the BP loci,  
22 grouping cell types by tissue.

23 The enrichment of DNase-hypersensitive sites among the BP loci is expressed by comparing the  
24 observed and expected number of SNPs overlapping DNA hypersensitive sites for each cell type. The  
25 enrichment is expressed numerically as "fold change".

26 **Supplementary Table 19:** Analysis of enrichment of methylation sites among the BP loci.

27 For each tissue, enrichment of overlap of BP SNPs (or proxies)<sup>16</sup> with H3K4me3 sites was calculated and  
28 the significance tested according to the approach in Trynka et al, 2013<sup>46</sup>. The  $P$  value is indicated for  
29 each of the two BP phenotypes (SBP and DBP) and their combination (SBP and DBP / SBP or DBP). The  
30 table is sorted by "SBP or DBP"  $P$  value.

1 **Supplementary Table 20:** BP SNPs enriched in DHS sites in blood vessels.

2 The index BP SNP is indicated and its chromosomal position, and the SNP that is enriched in DHSs in  
3 blood vessels. Further information on tissue categorisation and the DHS results is provided in  
4 **Supplementary Table 17.** DHS= DNase hypersensitivity site.

5 **Supplementary Table 21:** MAGENTA analysis.

6 In total 3,216 gene-sets were interrogated; only the gene sets (GS) yielding a FDR of < 0.5 (75% *P*-value  
7 threshold) are shown in this table. The original and effective gene-set sizes are indicated (orig. GS size  
8 and eff. GS size). The analyses were run using two conditions: using a *P* value cutoff at either 95% or 75%  
9 in the CM-BP analyses.

10 **Supplementary Table 22:** DEPICT analysis.

11 Data-driven Expression Prioritized Integration for Complex Traits (DEPICT)<sup>50</sup> was used to assess whether  
12 genes in genome-wide significant blood pressure regions were enriched for any of 14,461 reconstituted  
13 gene sets (see **Section 9**). Identifiers of reconstituted gene sets are prefixed by the Gene Ontology  
14 database, the Mouse Genome Project database, REACTOME, InWeb protein-protein interaction  
15 database, KEGG. The gene set name is based upon the source gene set. The column labeled Top 5 genes  
16 in reconstituted gene set provides the top 5 genes annotated to a given reconstituted gene set within an  
17 associated region along with the genes' strength of association (as Z score in brackets) for that  
18 reconstituted gene set. Among all tests conducted, only the tests yielding an FDR of  $\leq 5\%$  are retained in  
19 this table.

20 **Supplementary Table 23:** FAIRE analysis.

21 The *P* values for allele-specific FAIRE are provided for each SNP at each of the fine mapping loci (*P* <  
22 0.05). The index and proxy SNPs, their positions (hg19), correlation (*r*<sup>2</sup>), and number (*n*) of  
23 heterozygotes are shown.

24 **Supplementary Table 24:** Non-European meta-analysis.

25 Association results for 66 SNPs from the European meta-analysis for each BP phenotype (SBP and DBP)  
26 in three samples of non-European ancestry (South Asian, East Asian and African). The coded allele (CA)  
27 and non-coding allele (NCA) are indicated alongside the coded allele frequencies (CAF) for European-  
28 ancestry participants (CAF\_EUR), for South Asian ancestry participants (CAF\_SAS), for East Asian  
29 ancestry participants (CAF\_EAS), and for African ancestry participants (CAF\_AFR). The association results  
30 for each ancestry include beta, standard error (SE), *P* value, and the total sample size (Total N). The  
31 association results for a meta-analysis across all non-European participants is provided, and include

1 beta, SE, *P*-value and Total N. The previously significant (signif.) column indicates if the variant was  
2 previously reported to be associated with blood pressure in a non-European ancestry analyses. The  
3 heterogeneity metrics Cochran Q (Coch\_Q) and  $I^2$  are indicated, calculated using summary results from  
4 all ancestries. Power indicates statistical power using an additive model, the effect size estimated in the  
5 European ancestry analyses, and an alpha of 0.05/66SNPs.

6 **Supplementary Table 25:** Detailed results of risk score analyses for each SNP per outcome.

7 The per SNP results underlying the risk score results shown in **Table 3** are presented. The chromosome  
8 (Chr) and position (hg19) of the index SNP is provided; the coded allele (CA) and non-coded allele (NCA)  
9 are indicated; and beta, SE and *P* value for each outcome. CAD: coronary artery disease, LV: left  
10 ventricle, CKD: chronic kidney disease, eGFR: estimated glomerular filtration rate, cr: creatinine,

11 **Supplementary Table 26:** Genetic BP risk-score analysis applied to related cardiovascular phenotypes.

12 The BP genetic risk score was applied to related cardiovascular phenotypes using public databases (T2D:

13 <http://diagram-consortium.org/about.html>); BMI and height:

14 [https://www.broadinstitute.org/collaboration/giant/index.php/GIANT\\_consortium\\_data\\_files](https://www.broadinstitute.org/collaboration/giant/index.php/GIANT_consortium_data_files);

15 lipids: <http://csg.sph.umich.edu//abecasis/public/lipids2013/>). Pt = phenotype investigated, noSNPs =

16 number of SNPs used in the analysis, SBPeffect/DBPeffect = effect size of the genetic BP risk score,

17 SBPpval/DBPpval = *p*-value of the genetic risk score analysis. Information is provided on candidate

18 genes per new locus using the definition described in **Section 12** of this document.

19 **Supplementary Table 27:** Genes at new BP loci using DEPICT.

20 Information is provided on candidate genes per new locus using the definition described in **Section 12** of

21 this document.

22

**1 14 Supplementary figures**

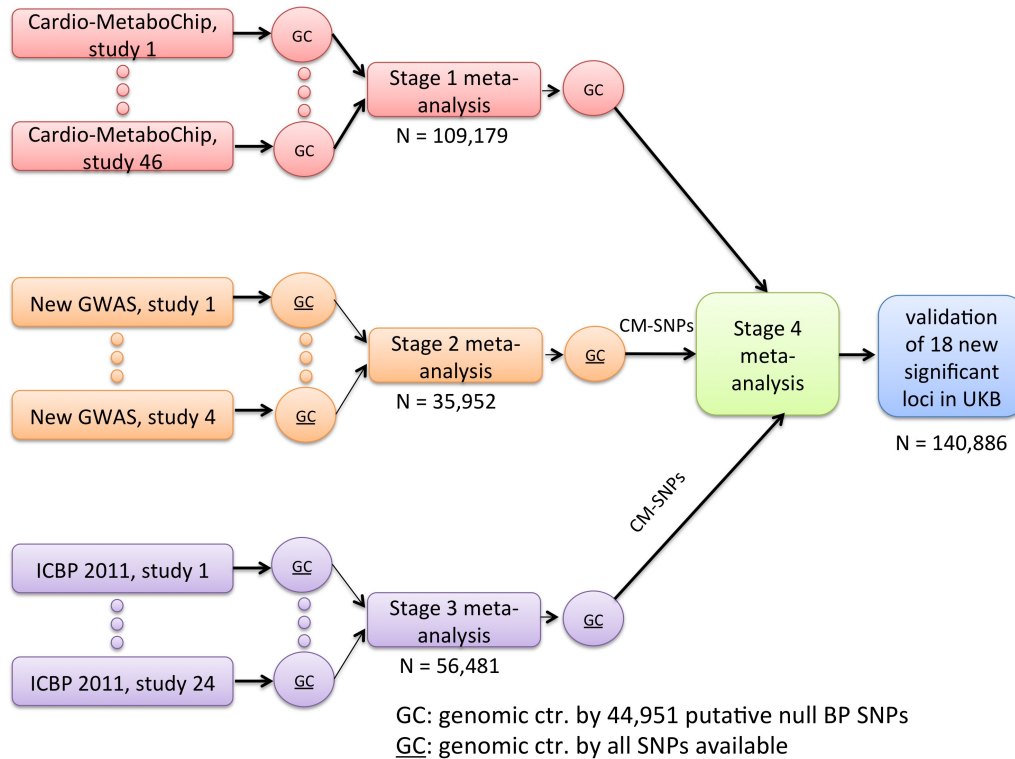

**Supplementary Figure 1. Schematic of the experimental design of the meta-analyses.** Meta-analyses were carried out in 4 stages (see **Supplementary Information**). Stage 1: results from 46 studies genotyped using Cardio-MetaboChip; Stage 2: unpublished results based on imputed genotypes from genome-wide genotyping arrays of 4 studies; Stage 3: results from published imputed genotypes from genome-wide genotyping arrays of 24 studies; Stage 4: meta-analysis of the 3 separate meta-analyses, including a total of 201,529 individuals. "GC" indicates at what stages genomic-control was applied and the SNPs that were used. The final meta-analysis was not corrected by genomic-control. Subsequently, a validation step was performed for 18 sentinel SNPs from genome-wide significant loci without prior support in the literature. UKB = UK Biobank.

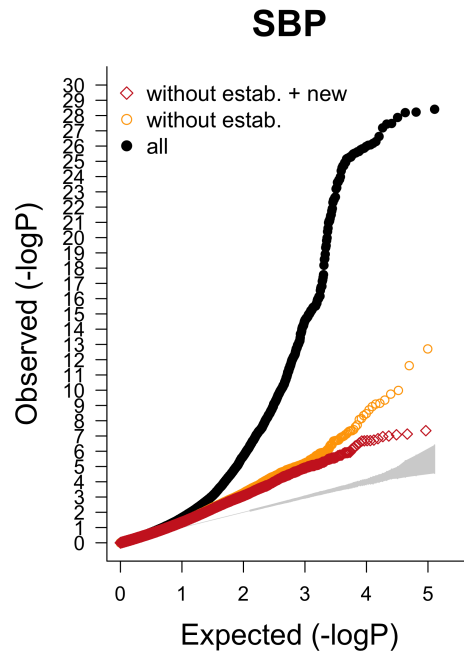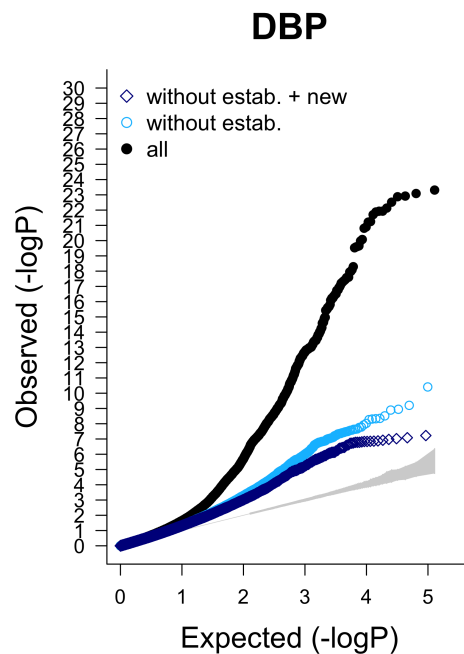

**Supplementary Figure 2. Quantile-quantile-plots of the p-values from the Stage 4 Cardio-MetaboChip-wide meta-analysis for SBP and DBP.** Observed  $-\log_{10}P$  are plotted against expected  $-\log_{10}P$  for three datasets: in black the entire dataset; in orange (SBP) and light blue (DBP) results after removal of all SNPs within a 3.5Mb window around index SNPs at previously reported loci; in red (SBP) and dark blue (DBP) results after removal of all 66 loci significant in our study.



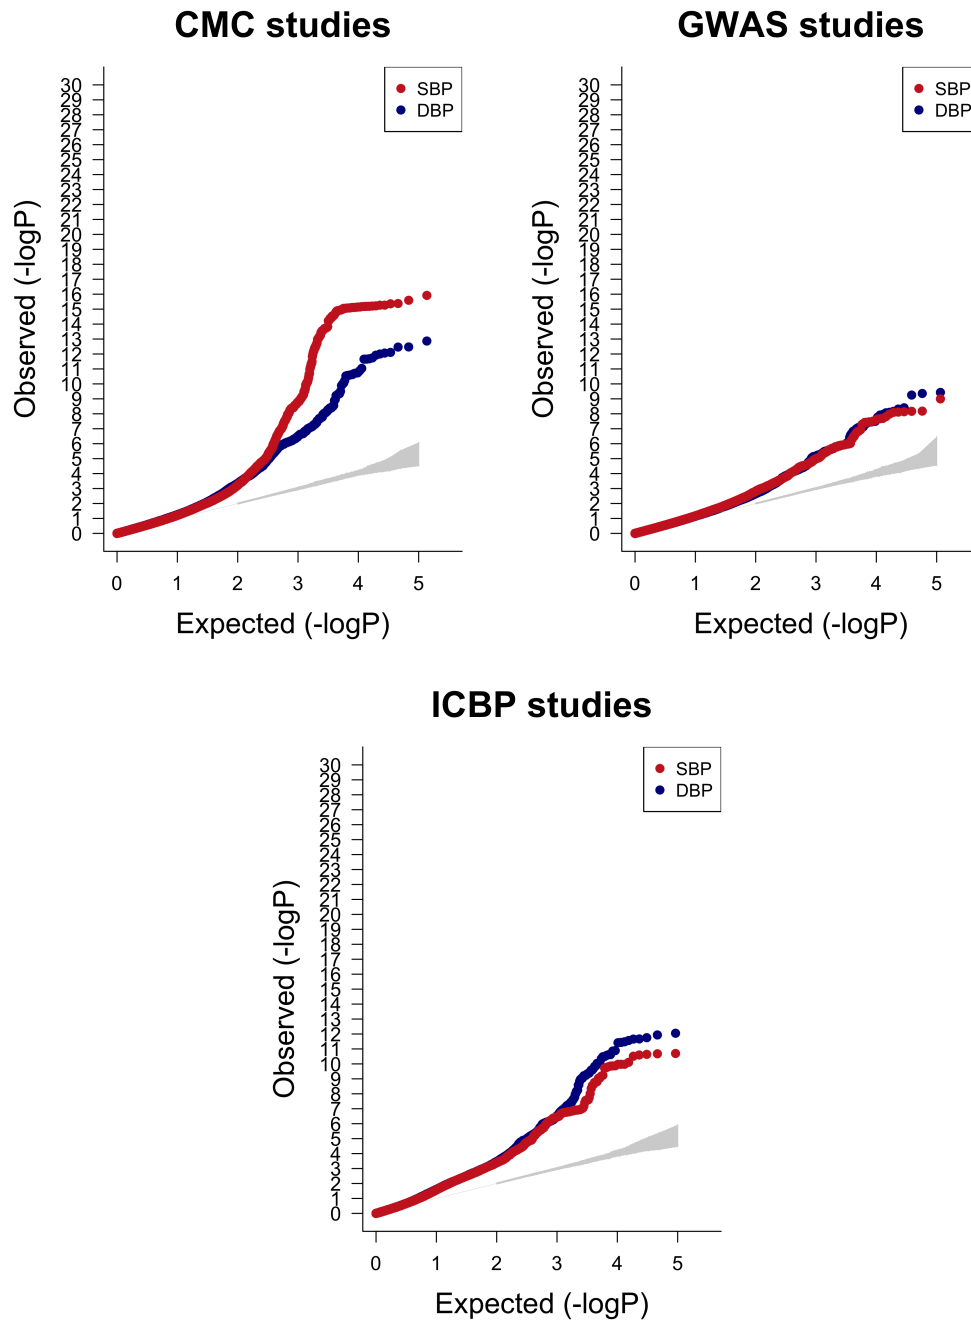

**Supplementary Figure 3. Quantile-quantile-plots of the P values at each stage of the meta-analysis.** The numbers include GC correction for the given stage.

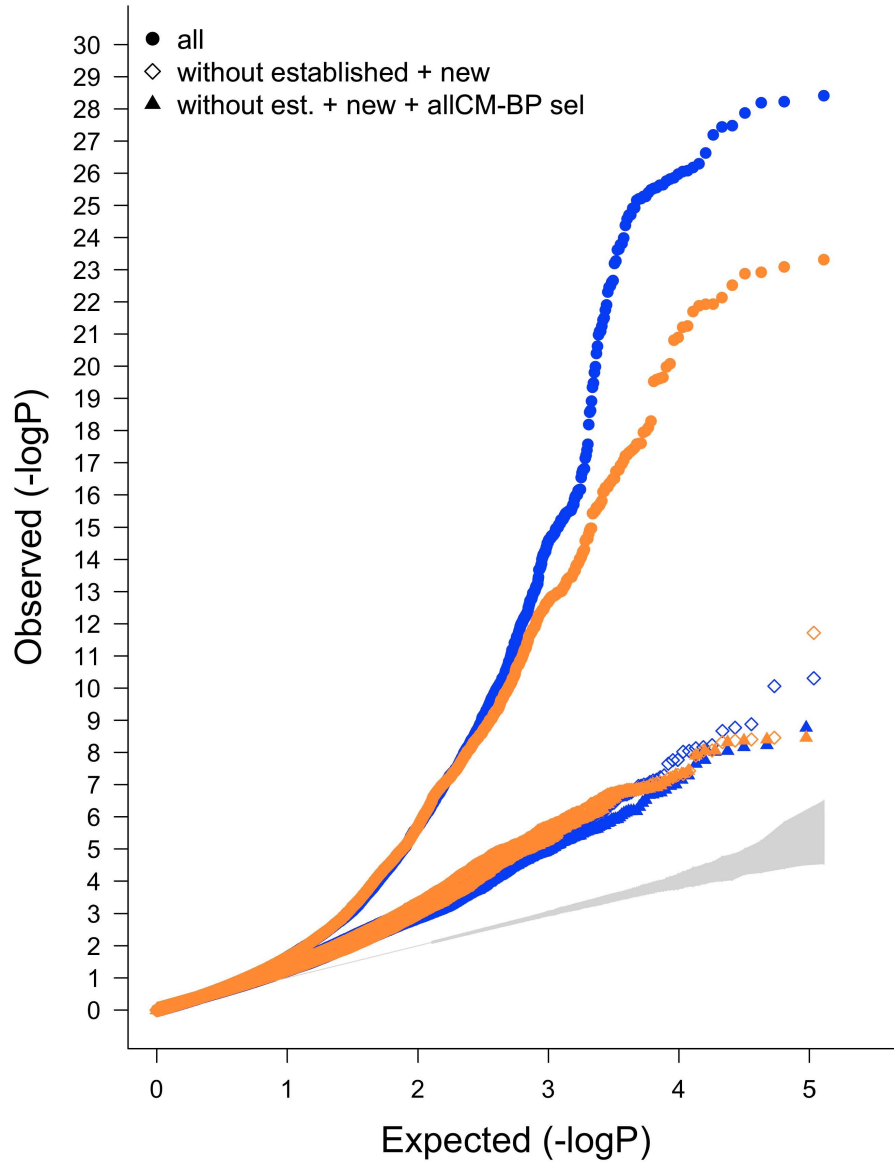

**Supplementary Figure 4. Quantile-quantile-plots of the P values of final meta-analysis results after subtracting new, known, and all BP related SNPs contained on the Cardio-MetaboChip.** In addition to the 5,000 SNPs selected from previous studies, the Cardio-MetaboChip contains additional SNPs selected for fine-mapping of BP regions, in total amounting to 36,855 SNPs. The figures explores the impact of removing these SNPs from the dataset.

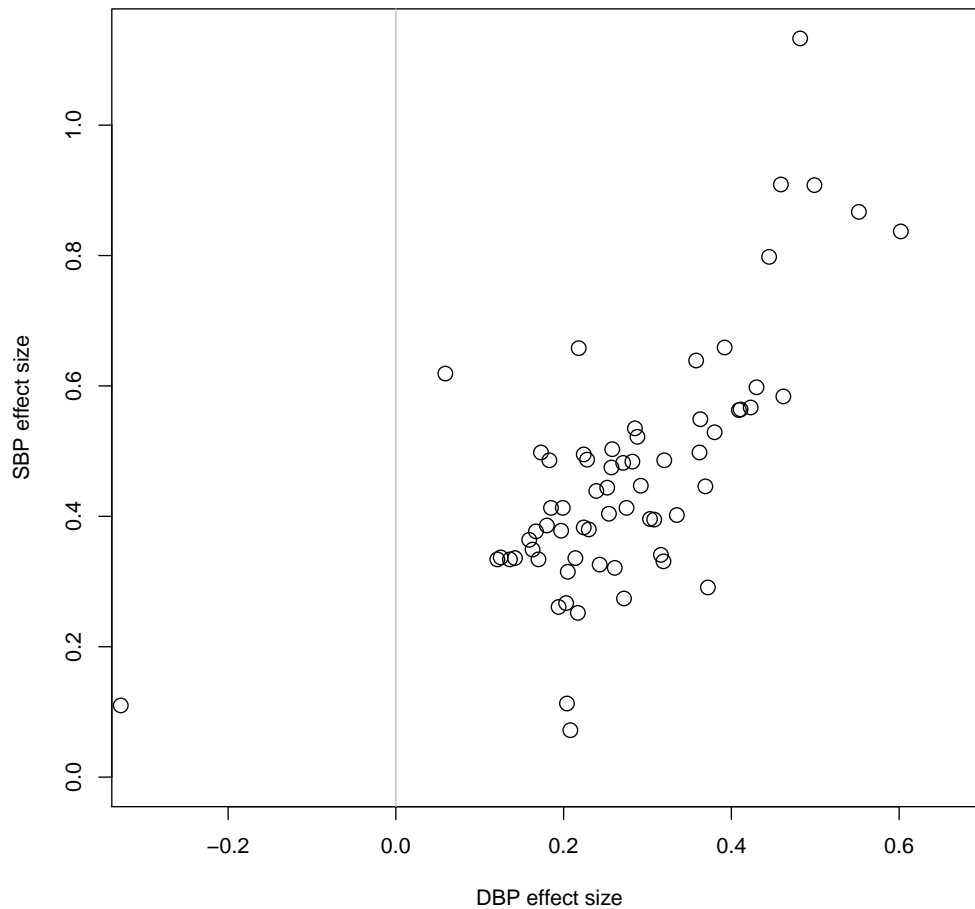

**Supplementary Figure 5. Effect-size plot for each of the 66 index SNPs.**

The effect sizes in mm Hg per allele at each of 66 index SNPs are plotted for both phenotypes: the SBP effect size (y-axis) is plotted as a function of the DBP effect size (x-axis).

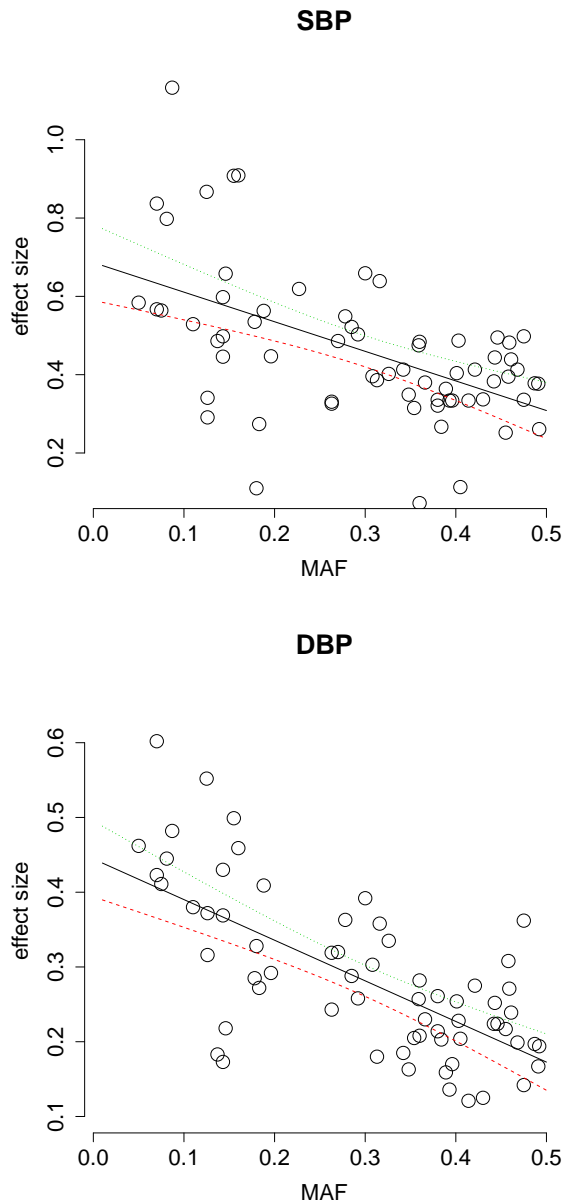

**Supplementary Figure 6. Effect-size by allele frequency plot for SBP and DBP.** The absolute effect size per allele at each of the 66 index SNPs is plotted as a function of minor allele frequency (MAF). The regression line includes 95%-confidence bounds (lower-bound in red, higher-bound in green).

# MTHFR-NPPB

## Unconditional Analysis

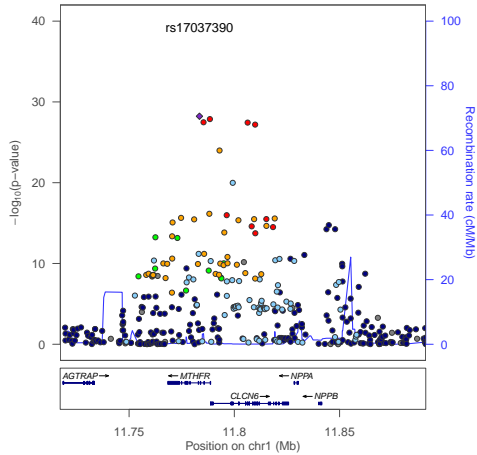

## Analysis Conditional on rs2272803

SBP

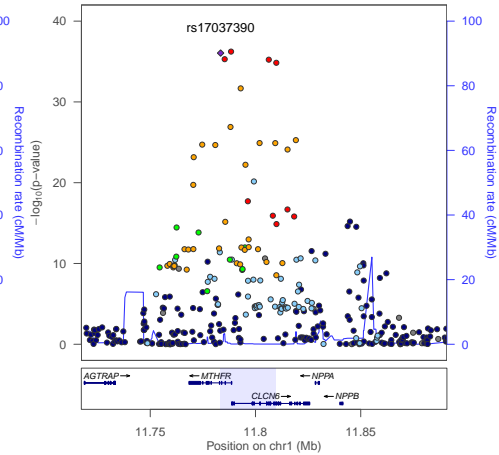

## Analysis Conditional on rs17037390

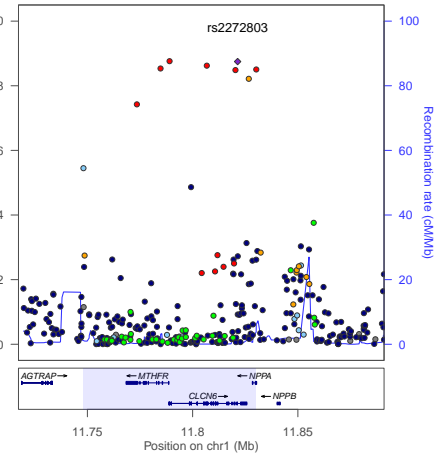

DBP

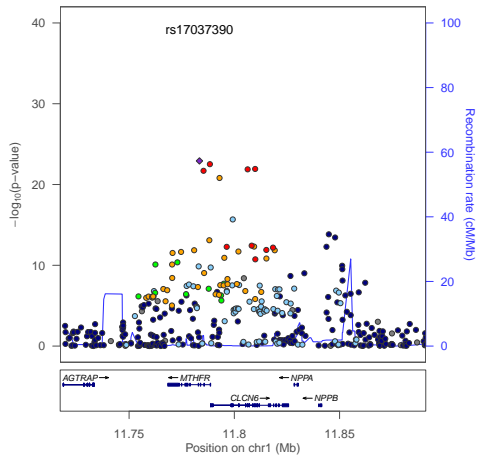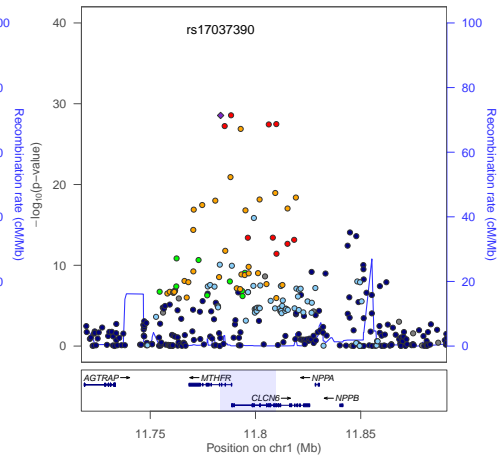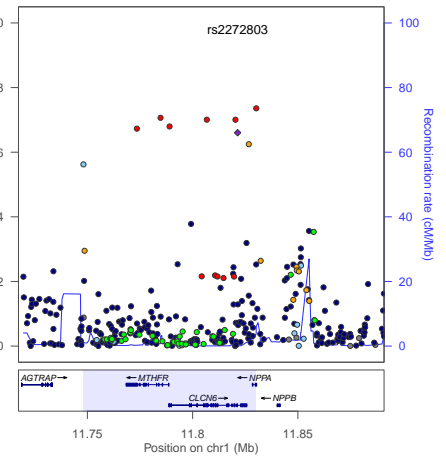

Supplementary Figures 7: Locus Zoom plots of BP loci. The unconditional analyses are shown to the left conditionals in the figures to the right.

# ST7L-CAPZA1-MOV10

Unconditional Analysis

Analysis Conditional on rs351370

Analysis Conditional on rs1620668

SBP

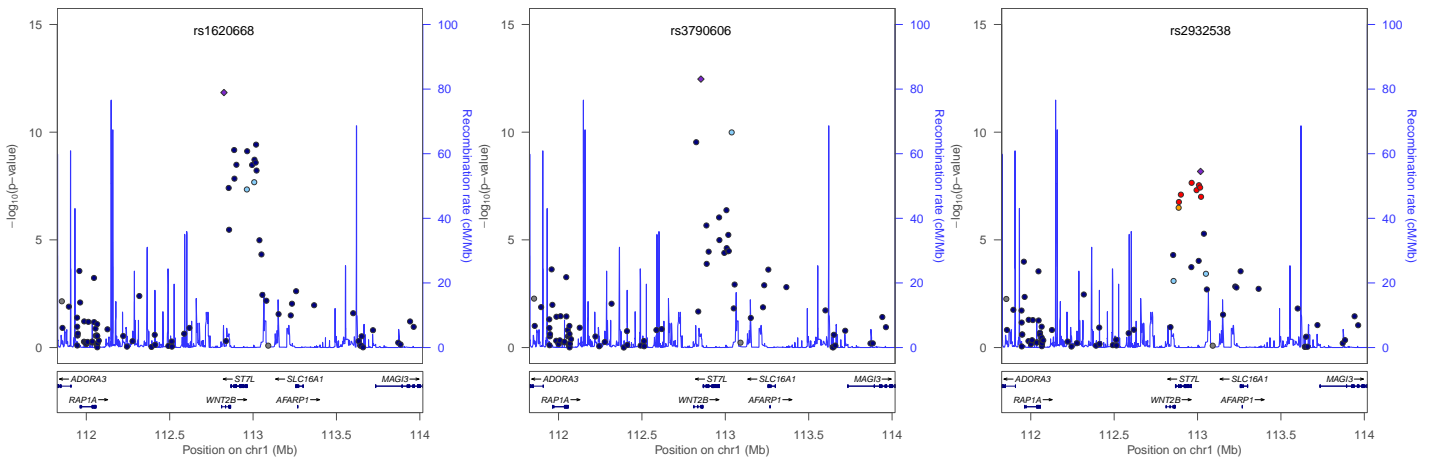

Analysis Conditional on rs2932538

Analysis Conditional on rs3790606

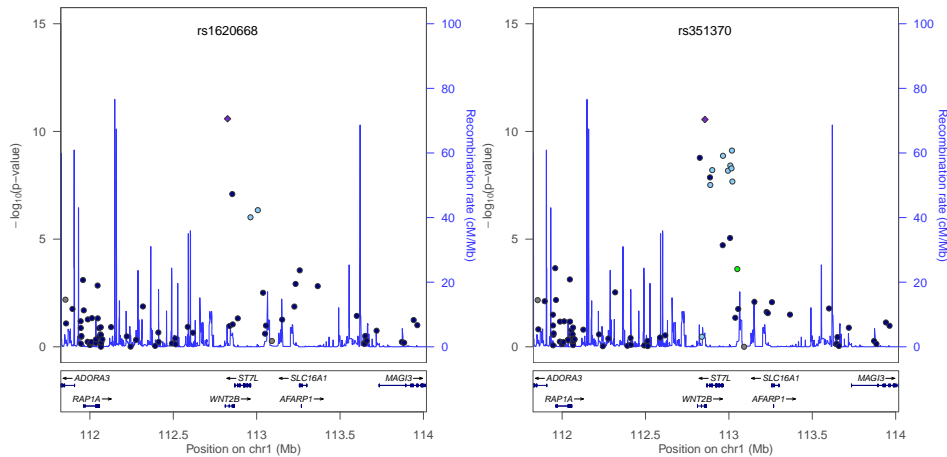

DBP

Unconditional Analysis

Analysis Conditional on rs351370

Analysis Conditional on rs1620668

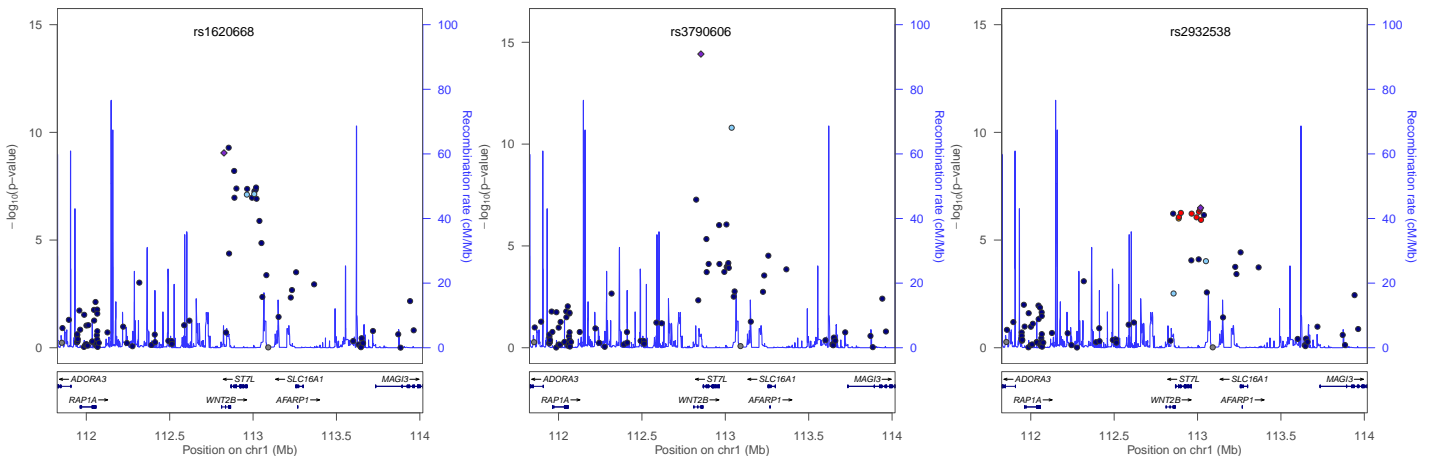

Analysis Conditional on rs2932538

Analysis Conditional on rs3790606

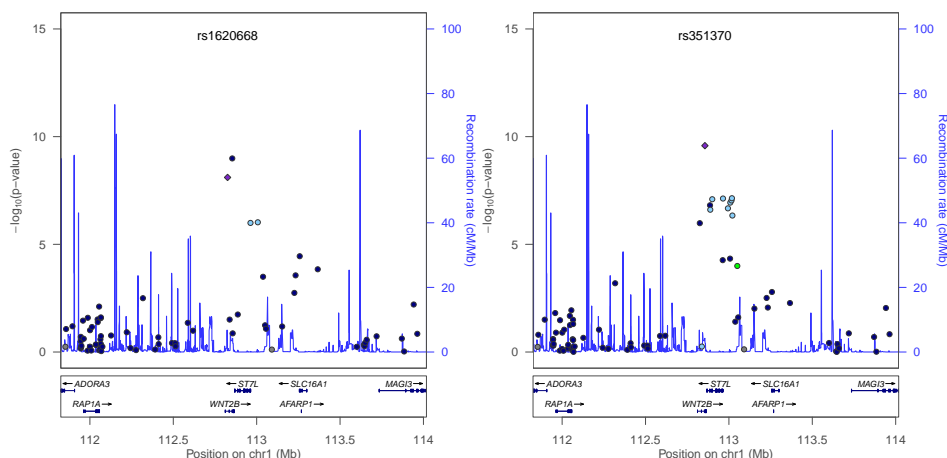

# FIGN-GRB14

## Unconditional Analysis

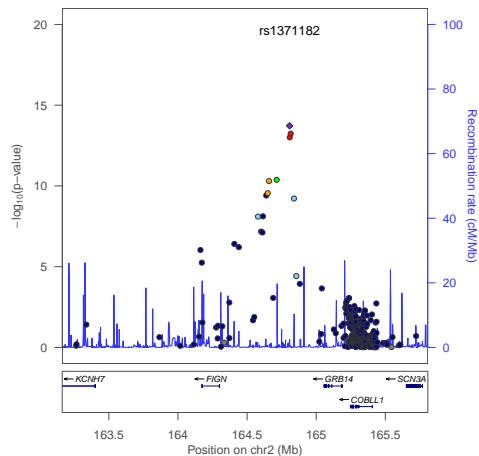

## Analysis Conditional on rs1371182

### SBP

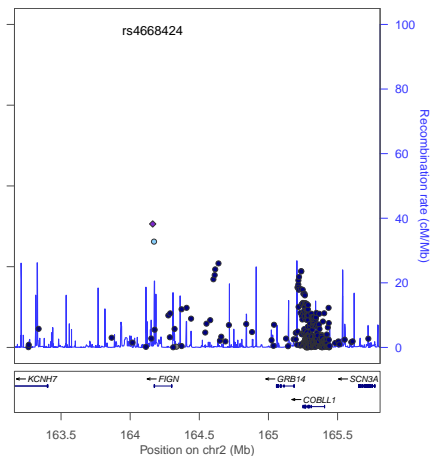

## Analysis Conditional on rs4668424

### SBP

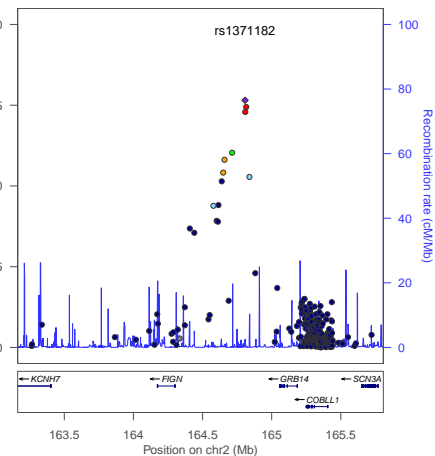

### DBP

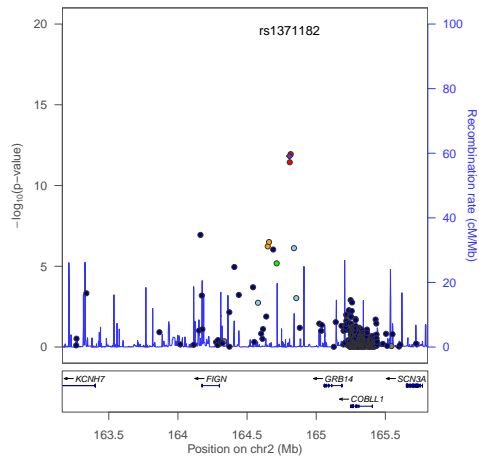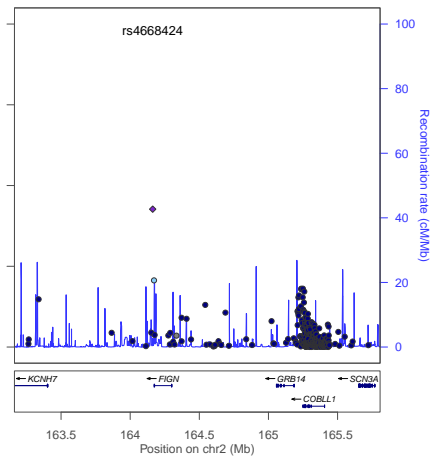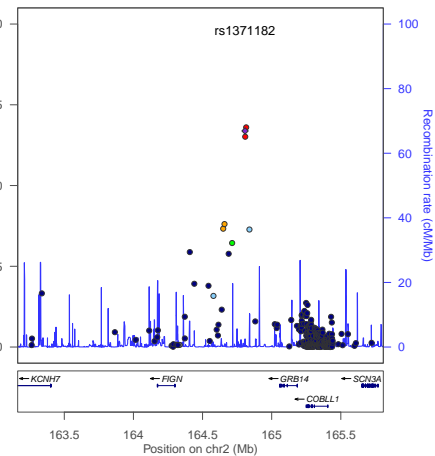

# MECOM

## Unconditional Analysis

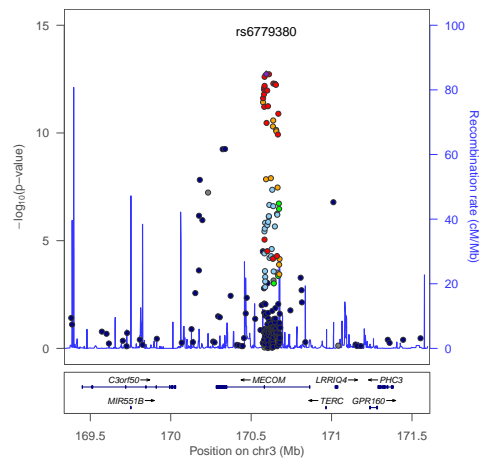

## Analysis Conditional on rs1918966

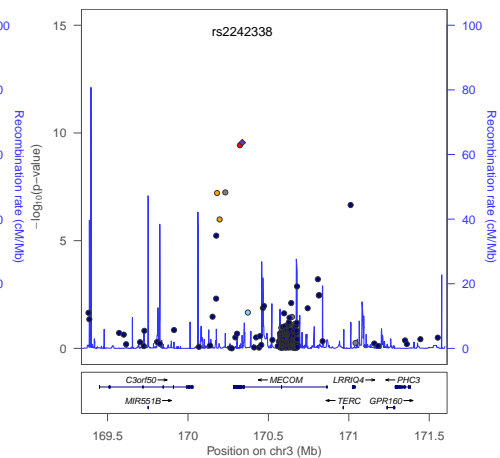

## Analysis Conditional on rs2242338

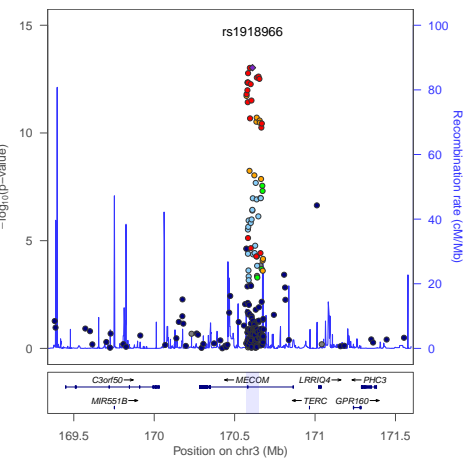

## DBP

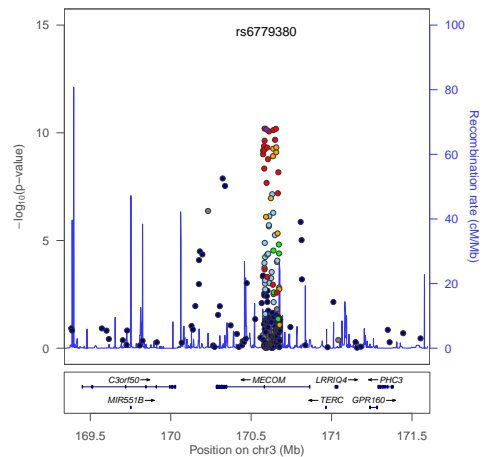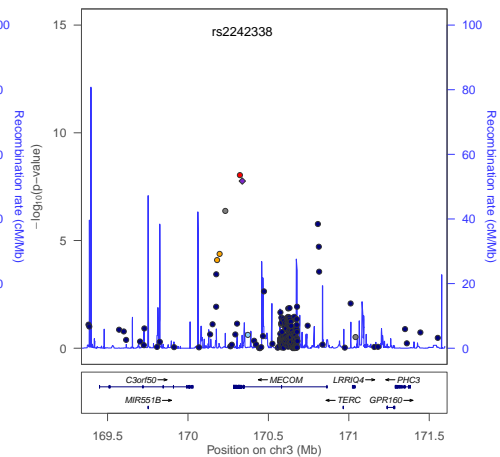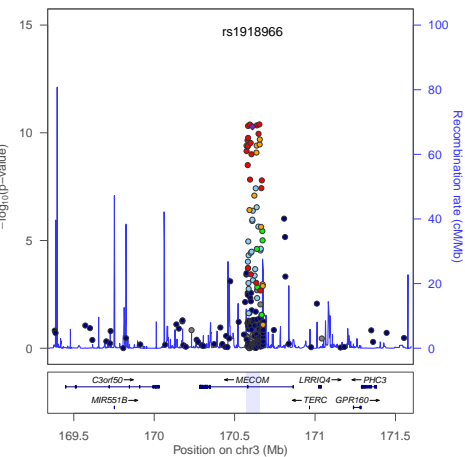



# GUCY1A3

## Unconditional Analysis

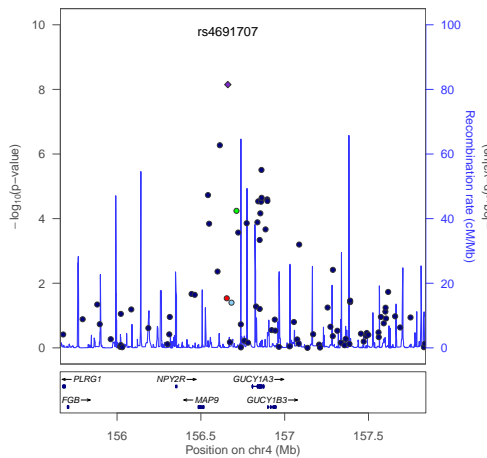

## Analysis Conditional on rs4691707

### SBP

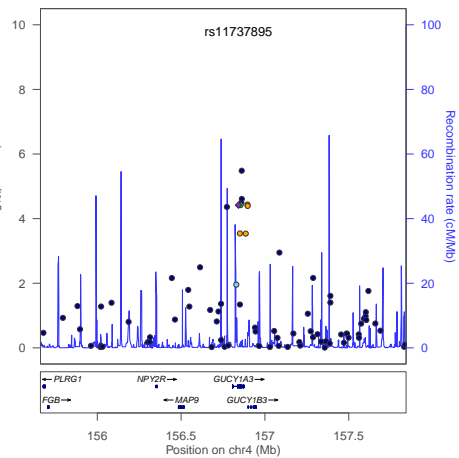

## Analysis Conditional on rs11737895

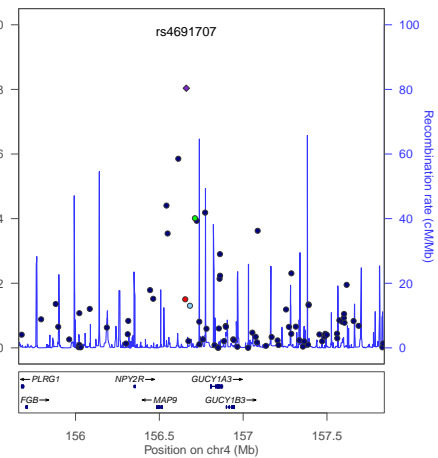

### DBP

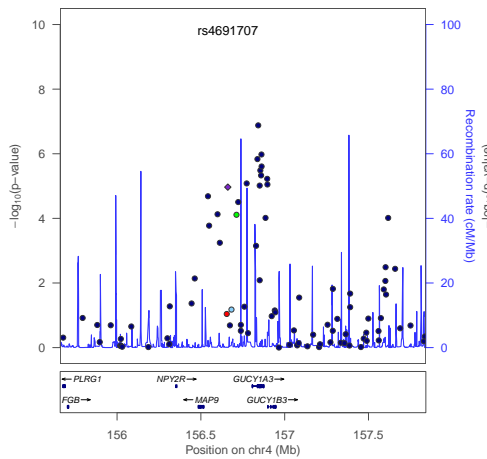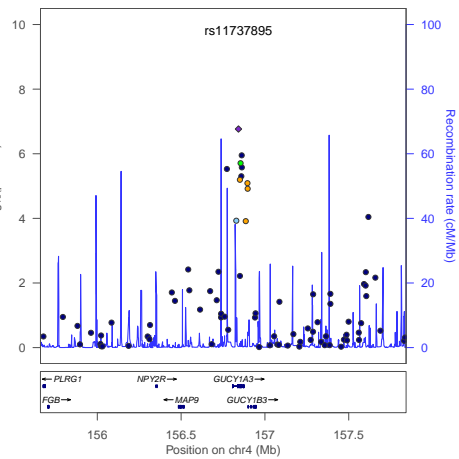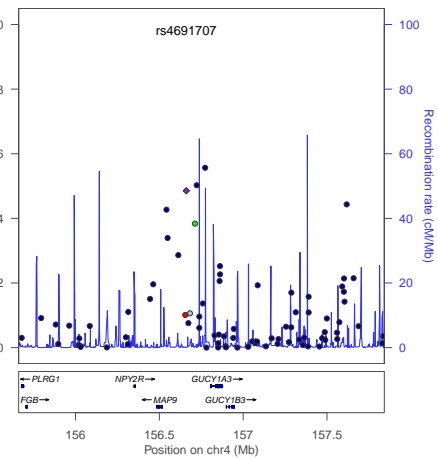

Unconditional Analysis

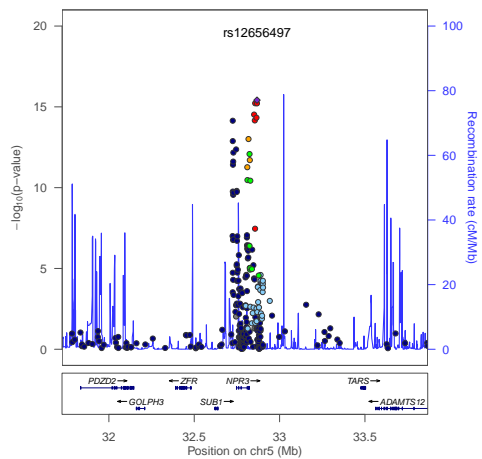

Analysis Conditional on rs7729447

SBP

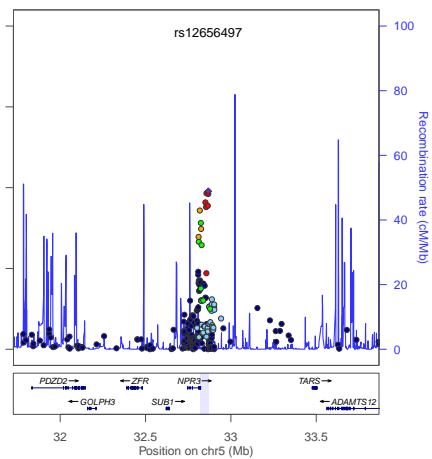

Analysis Conditional on rs12656497

DBP

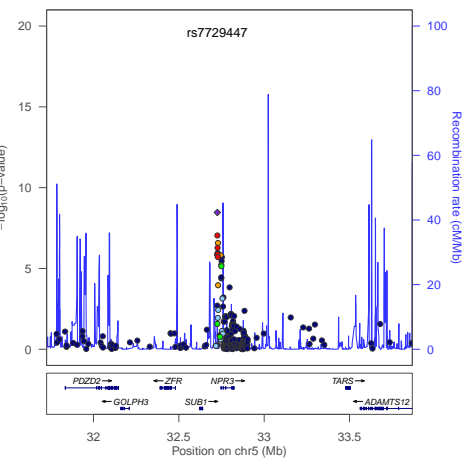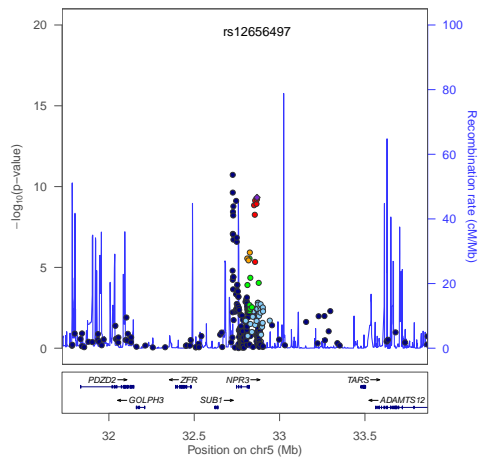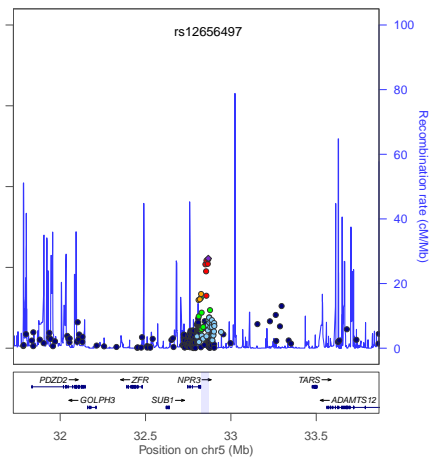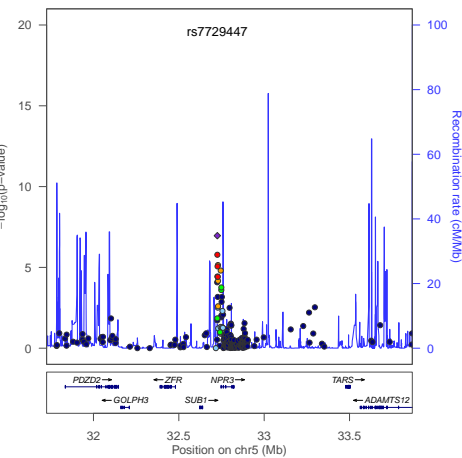

# HFE

## Unconditional Analysis

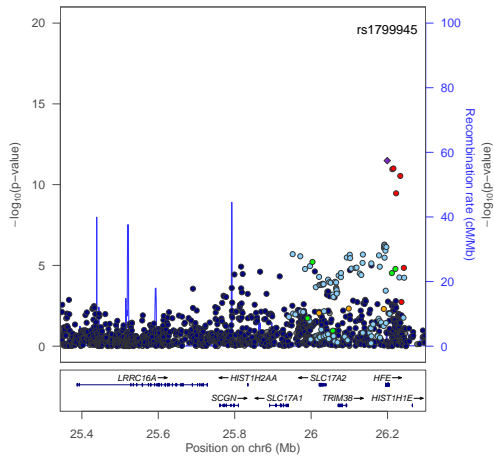

## Analysis Conditional on rs1799945

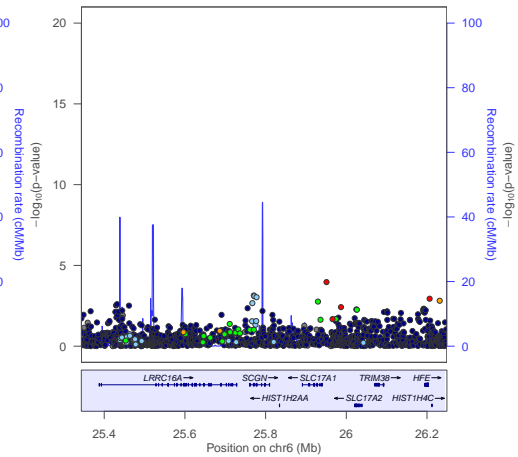

## Analysis Conditional on rs1800562

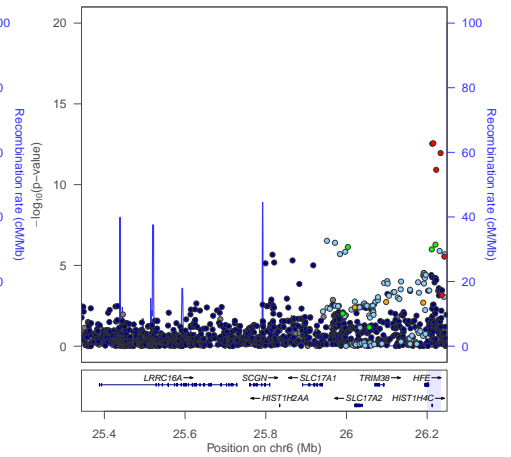

# DBP

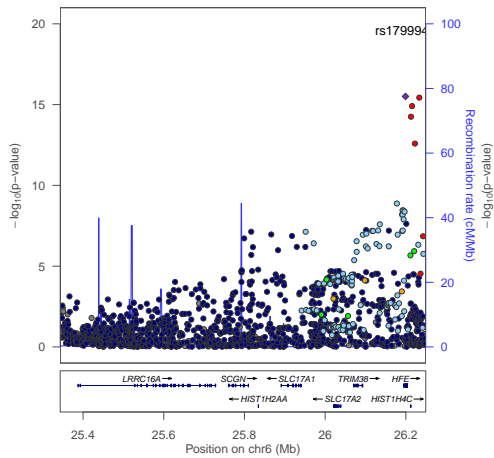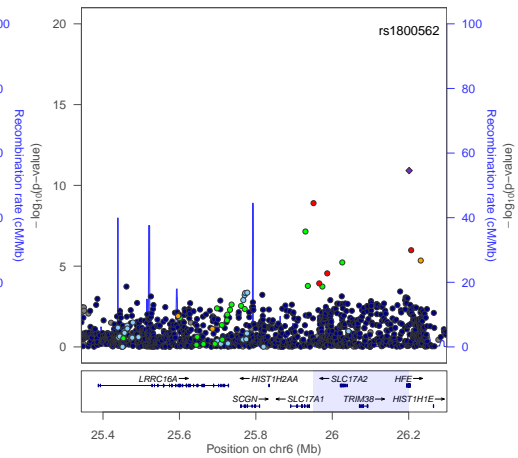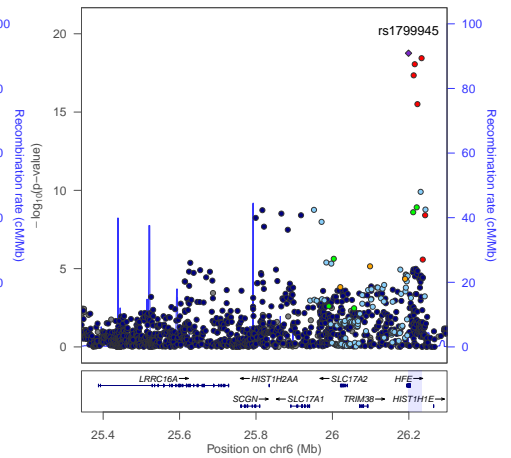

# BAT2-BAT5

## Unconditional Analysis

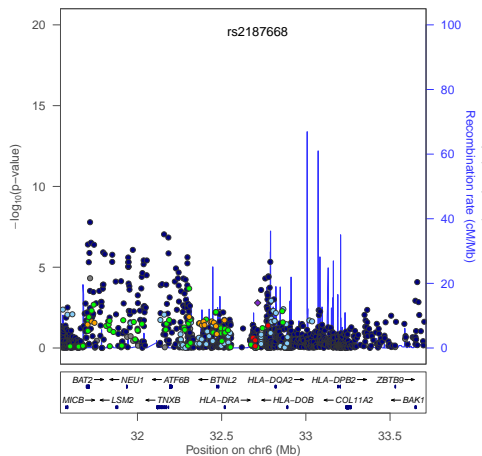

## Analysis Conditional on rs2187668

SBP

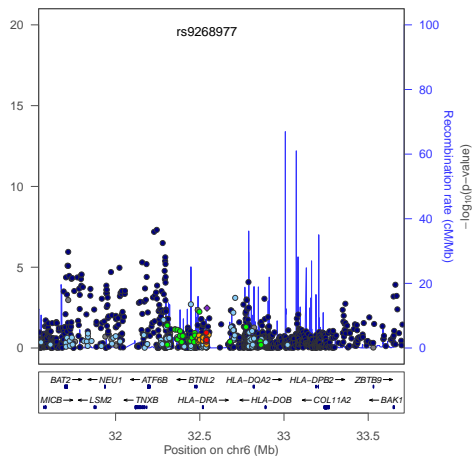

## Analysis Conditional on rs9268977

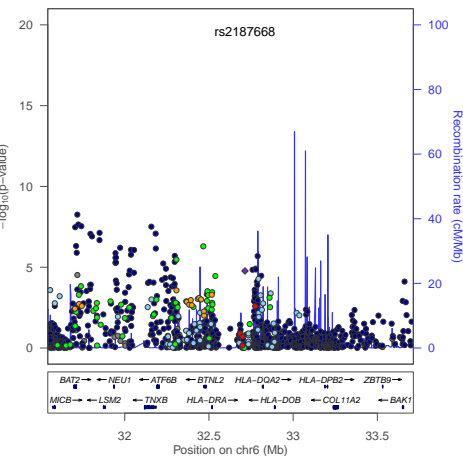

DBP

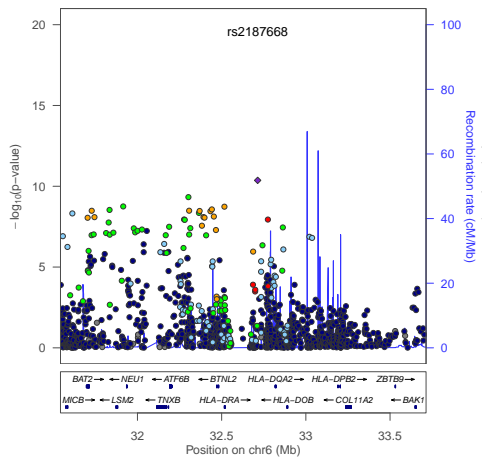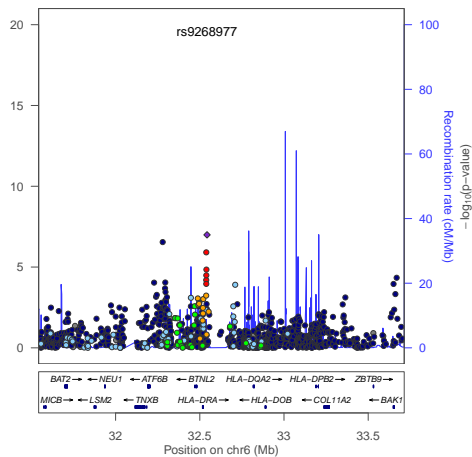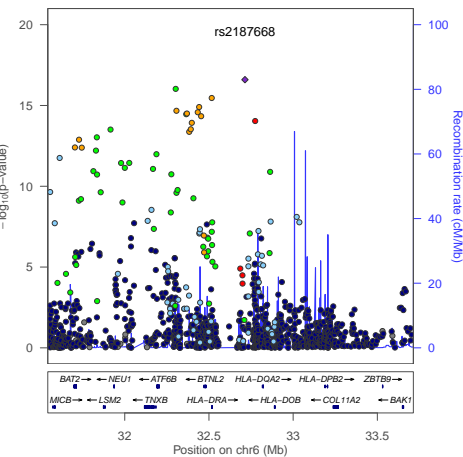

# HOTTIP-EVX

## Unconditional Analysis

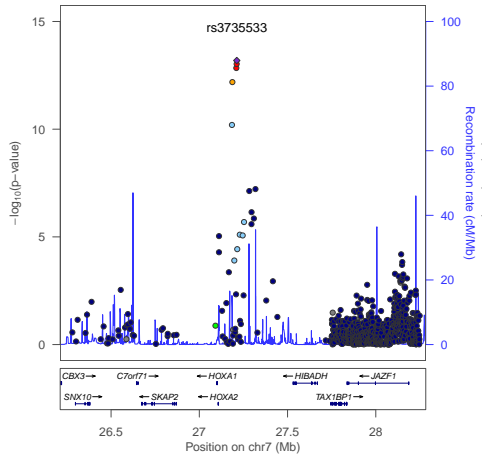

## Analysis Conditional on rs929250

SBP

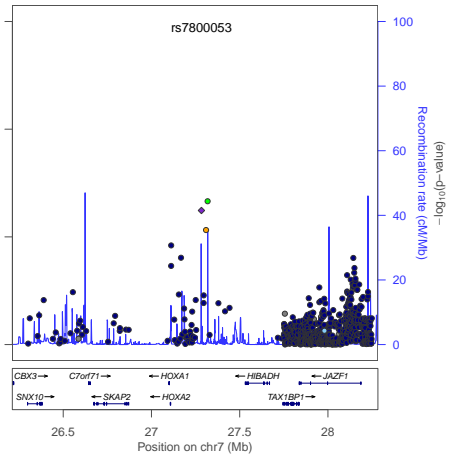

## Analysis Conditional on rs7800053

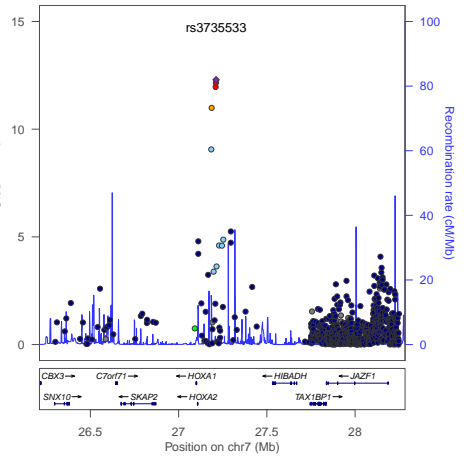

DBP

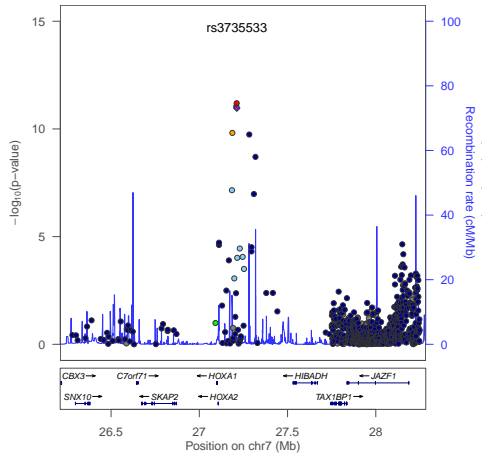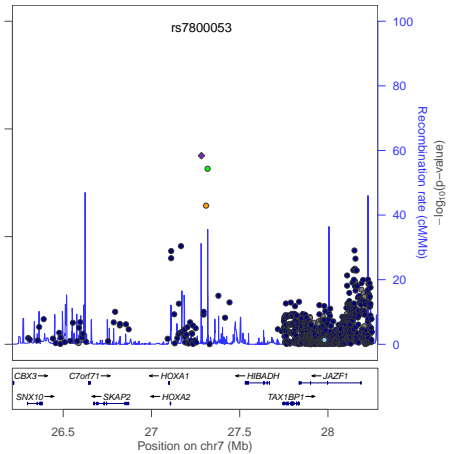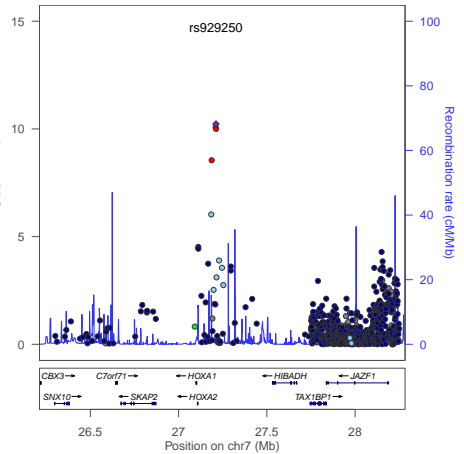

# ADRB1

## Unconditional Analysis

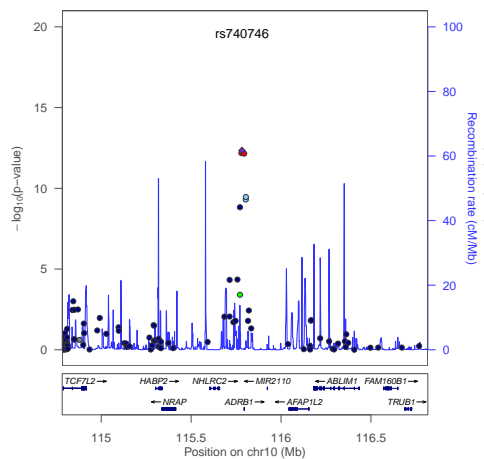

## Analysis Conditional on rs740746

### SBP

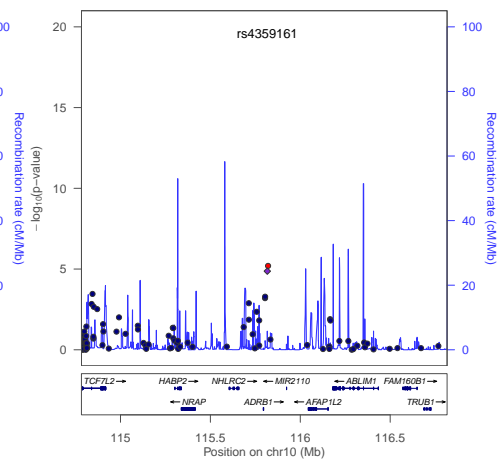

## Analysis Conditional on rs4359161

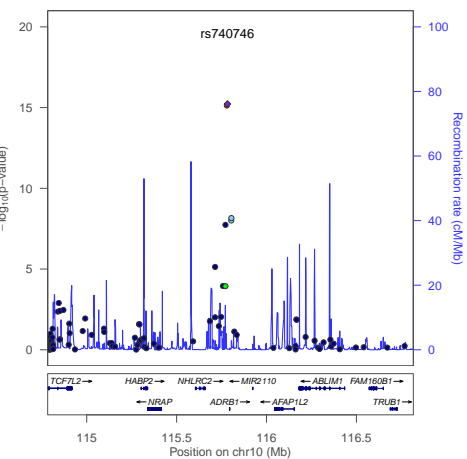

### DBP

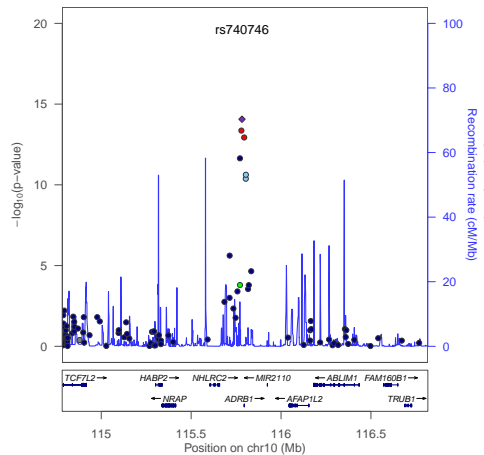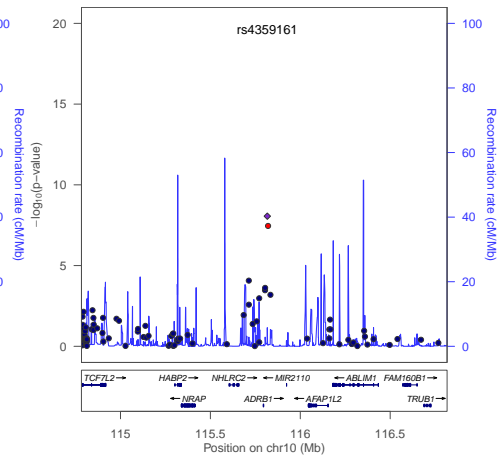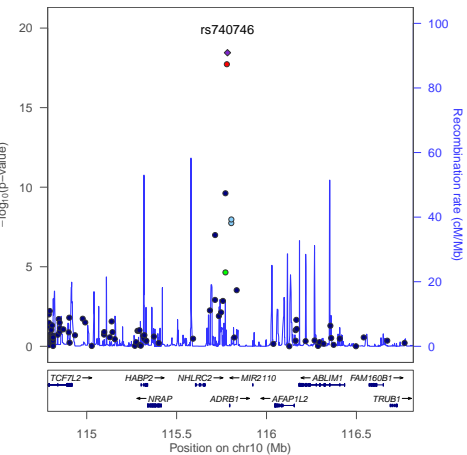

# ADM

## Unconditional Analysis

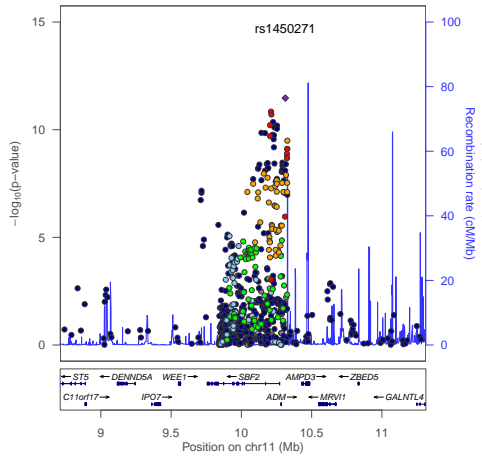

## Analysis Conditional on rs360157

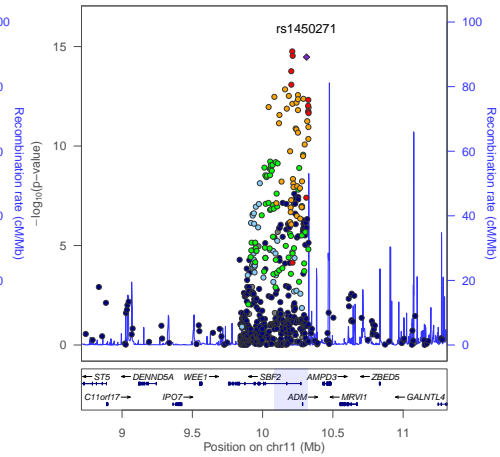

## Analysis Conditional on rs1450271

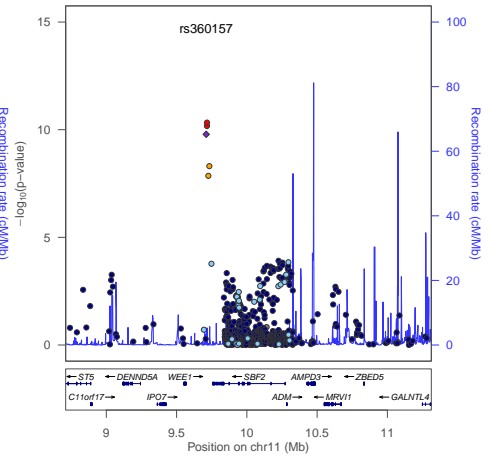

# DBP

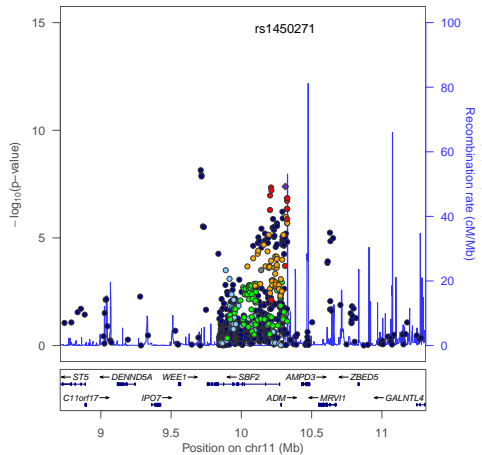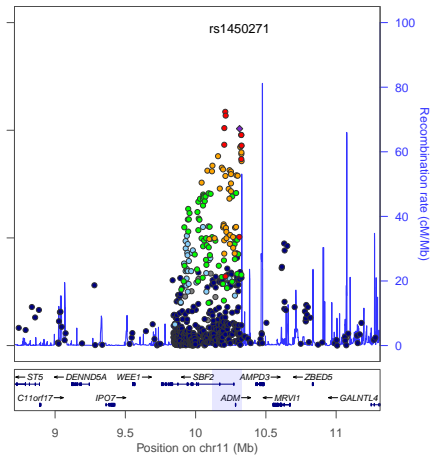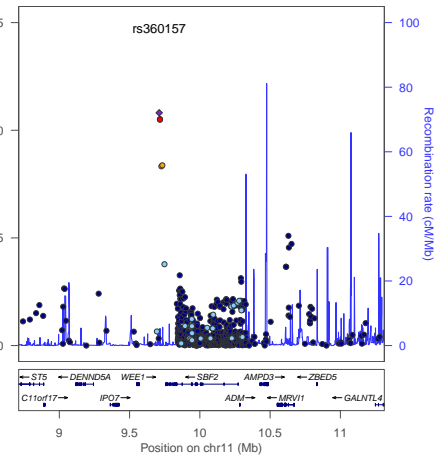

# PLEKHA7

# PLEKHA7

## Unconditional Analysis

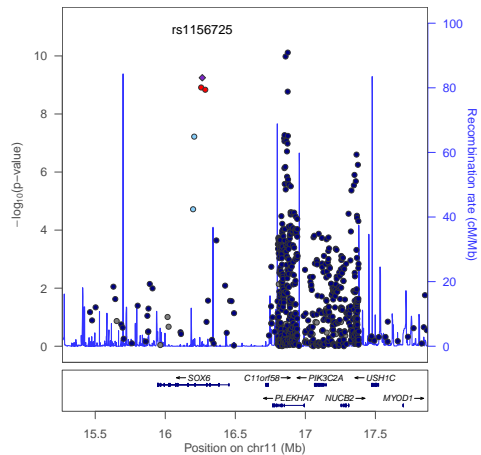

## Analysis Conditional on rs1156725

### SBP

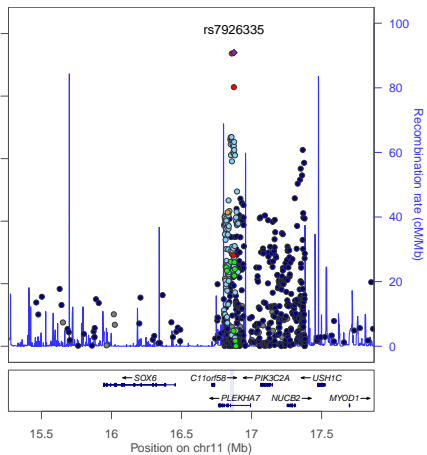

## Analysis Conditional on rs7926335

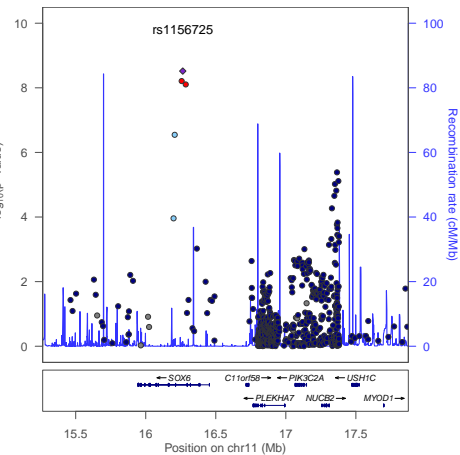

### DBP

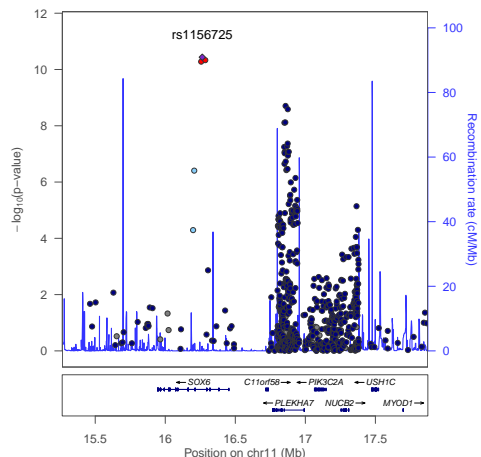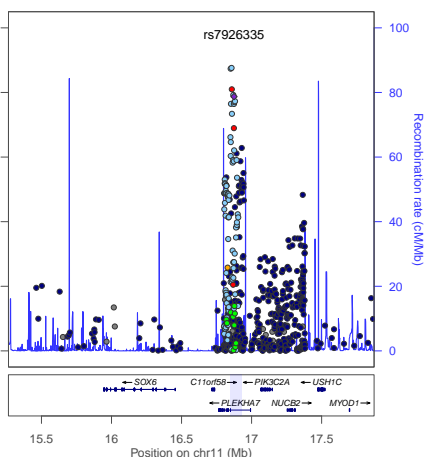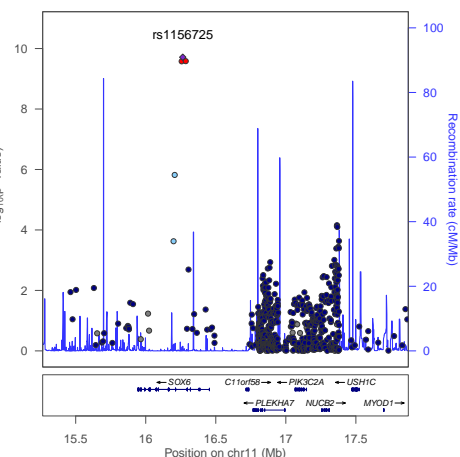



# ATP2B1

## Unconditional Analysis

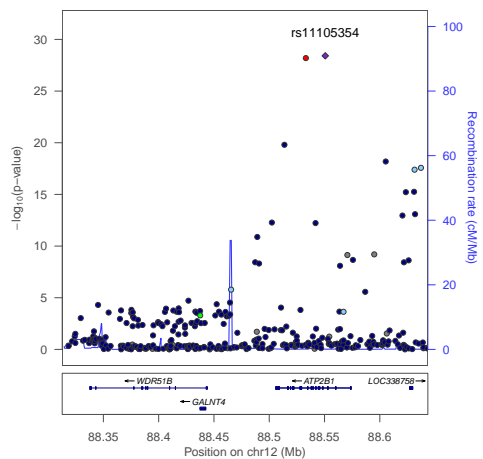

## Analysis Conditional on rs2681487

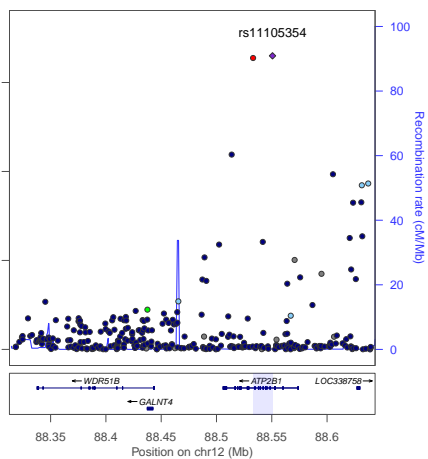

## Analysis Conditional on rs11105354

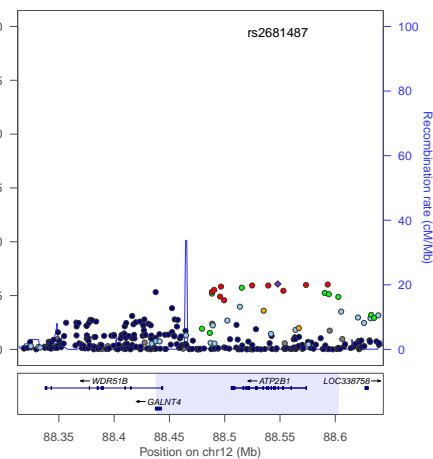

## DBP

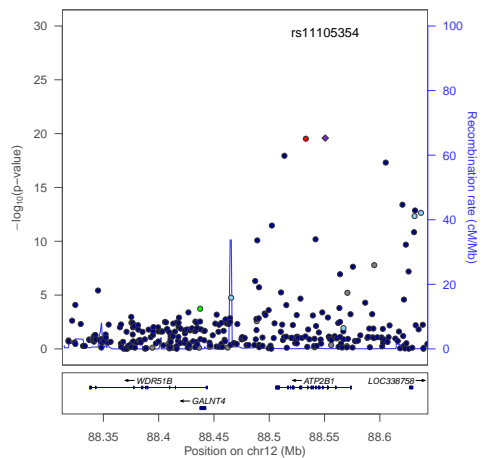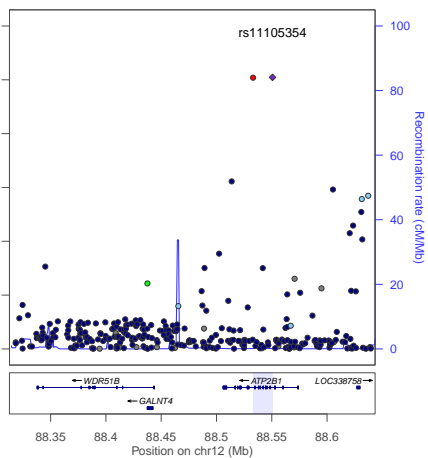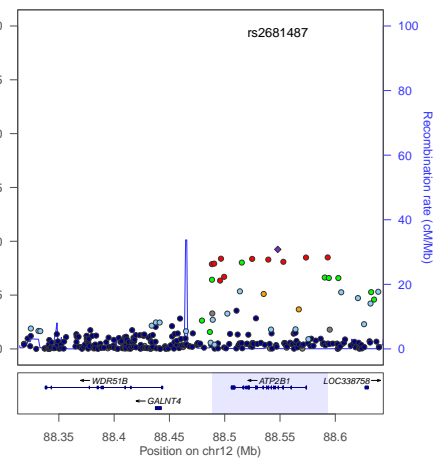

# TBX5-TBX3

## Unconditional Analysis

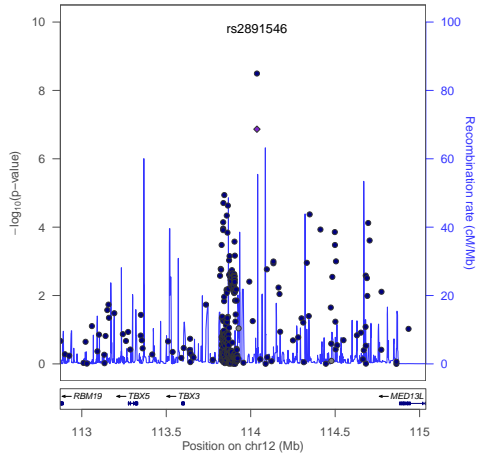

## Analysis Conditional on rs192267

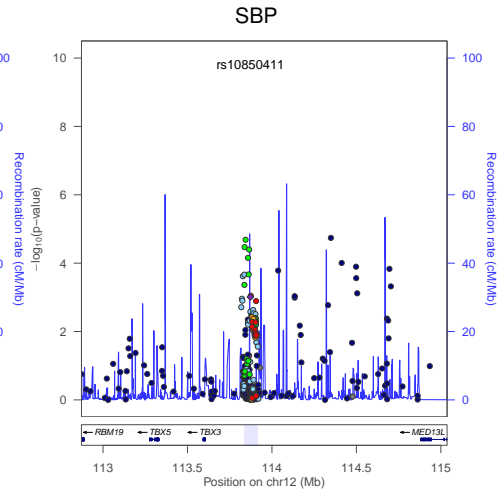

## Analysis Conditional on rs10850411

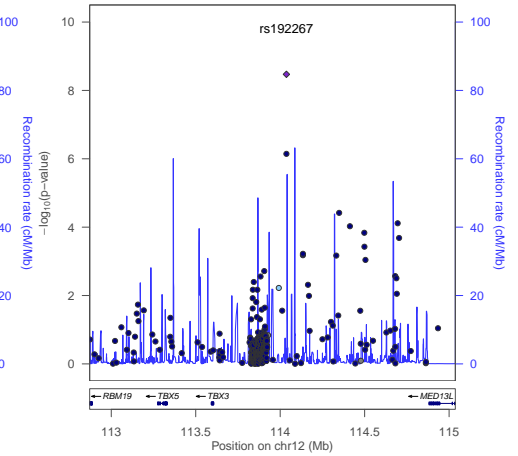

## DBP

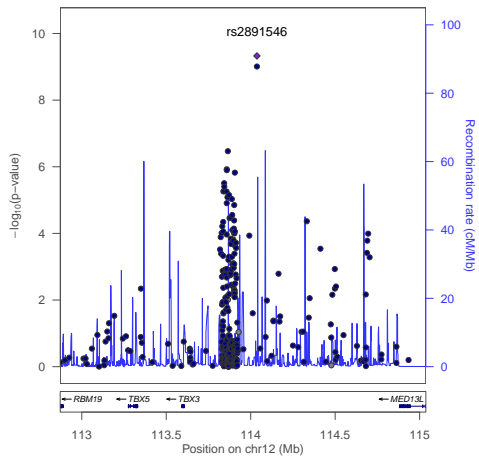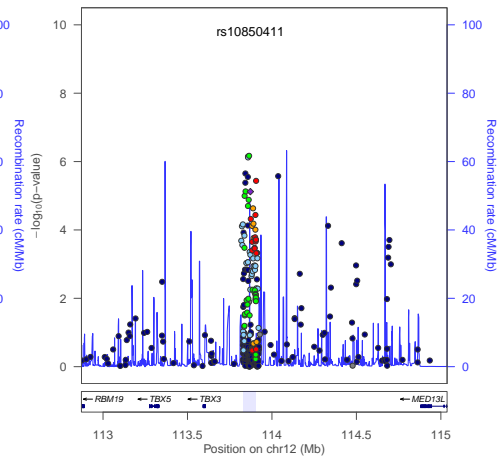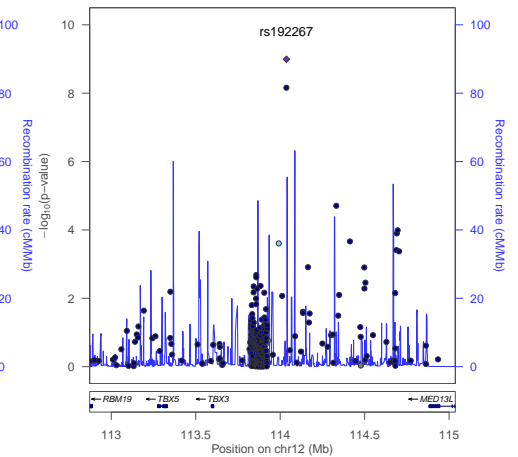

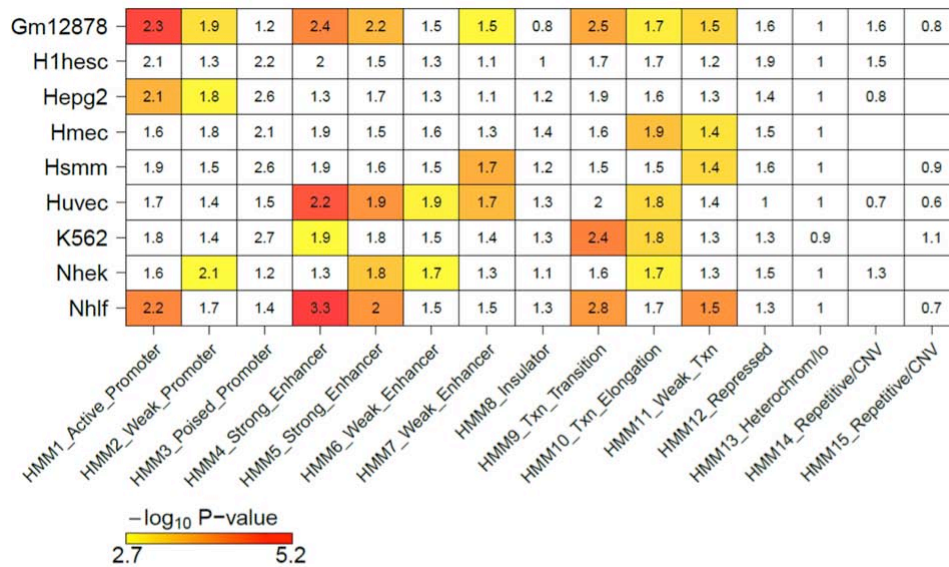

**Supplementary Figure 8. Matrix of fold enrichment for BP SNPs in predicted chromatin states in nine human cell types.** The boxes are colored by  $-\log_{10}P$  for enrichment. The white color indicates lack of significance after Bonferroni correction for 15 chromatin states and 9 tissues (see **Supplementary Information**). HMM = hidden Markov model; txn = transcription; lo=low signal; CNV = copy number variation. The ENCODE cell type codes are: embryonic stem cells (H1 ES), erythrocytic leukaemia cells (K562), B-lymphoblastoid cells (GM12878), hepatocellular carcinoma cells (HepG2), umbilical vein endothelial cells (HUVEC), skeletal muscle myoblasts (HSMM), normal lung fibroblasts (NHLF), normal epidermal keratinocytes (NHEK) and mammary epithelial cells (HMEC).

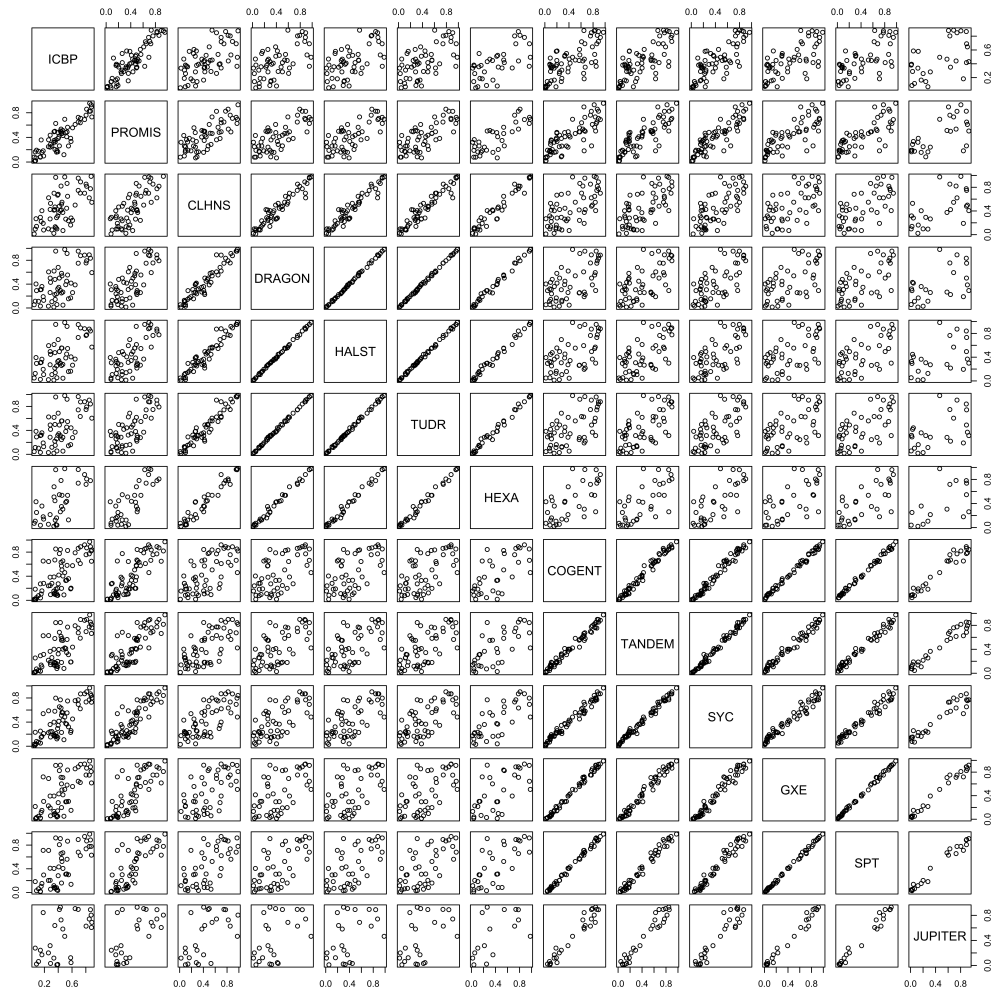

**Supplementary Figure 9. Effect allele frequency plots for all samples of non-European ancestry.** The effect allele frequency of each study is plotted against the effect allele frequency of every other study for all 66 index SNPs. The study names are indicated in the middle diagonal.

CAD, SBP; all SNPs

CAD, SBP; 10 pruned

CAD, DBP; all SNPs

CAD, DBP; 10 pruned

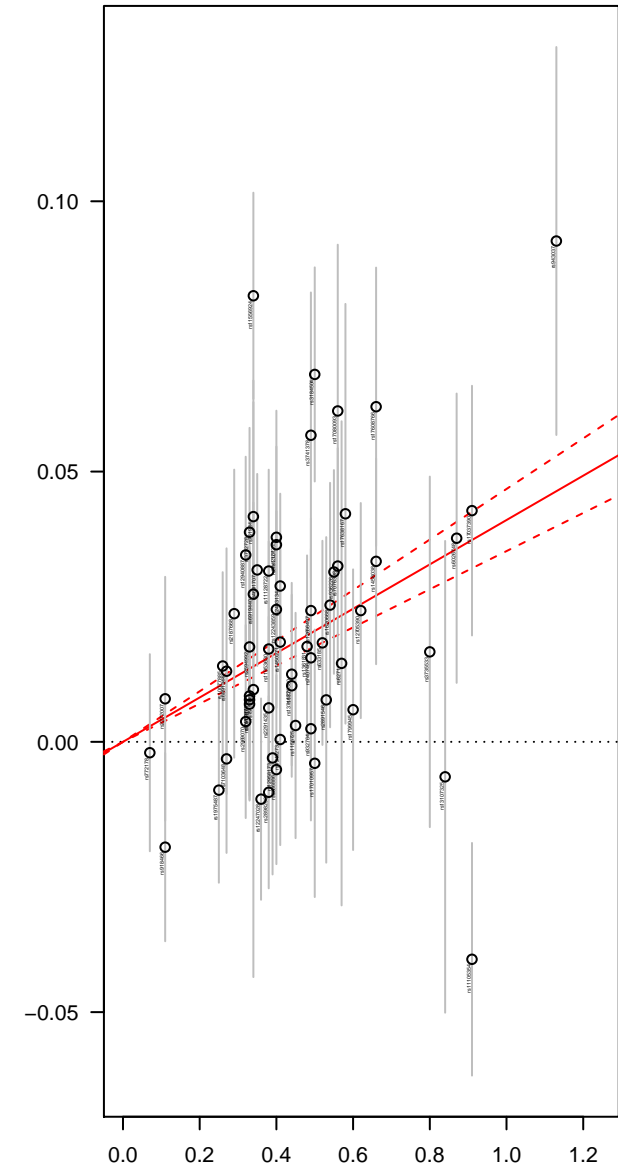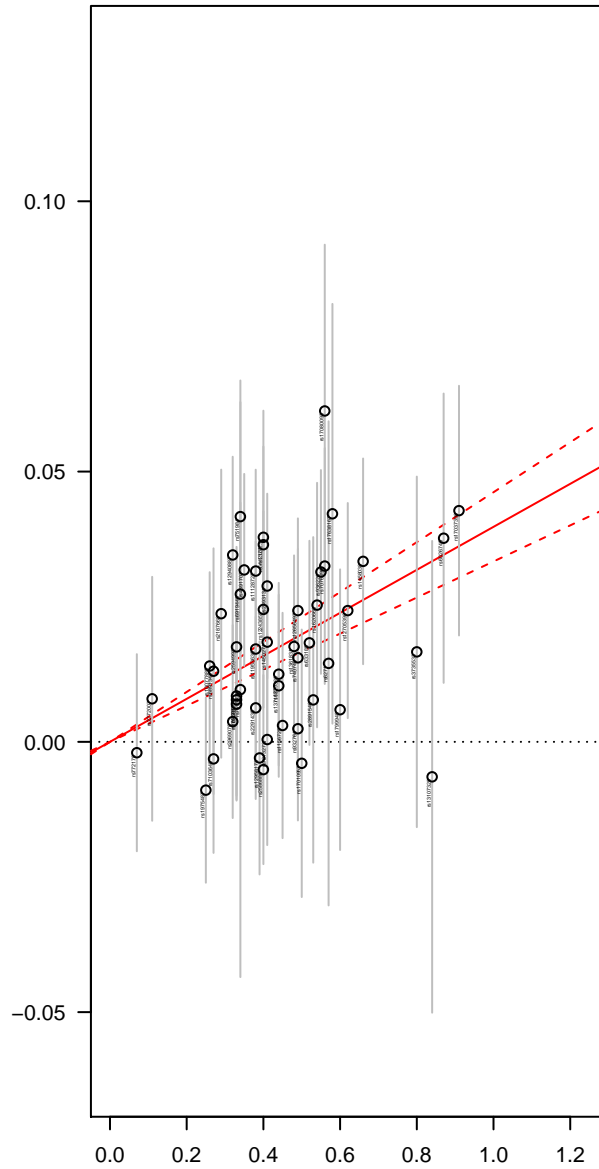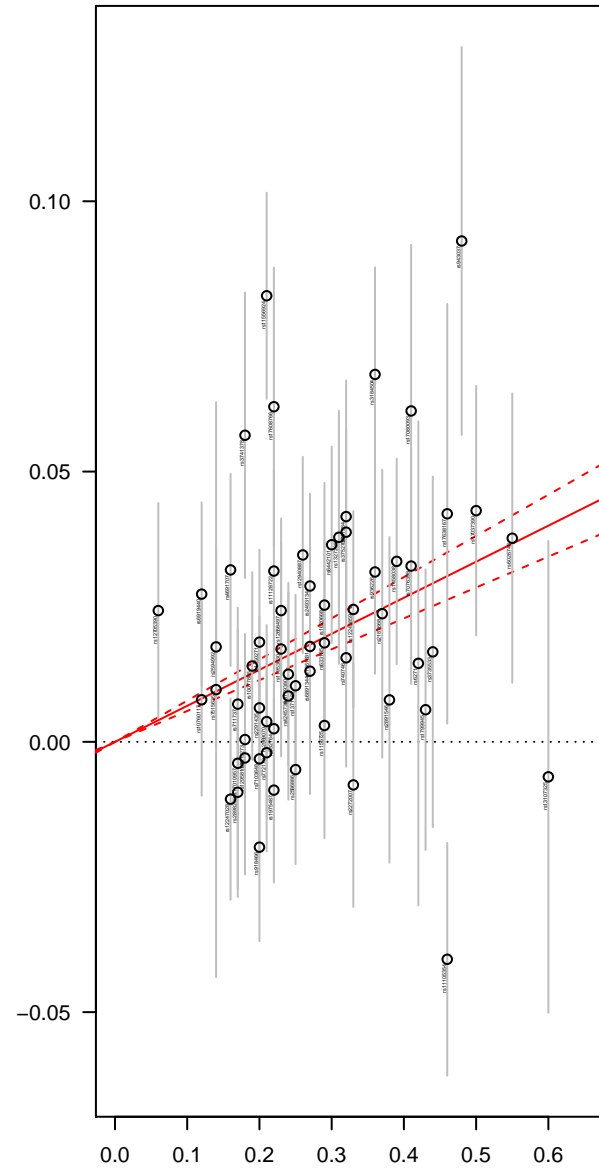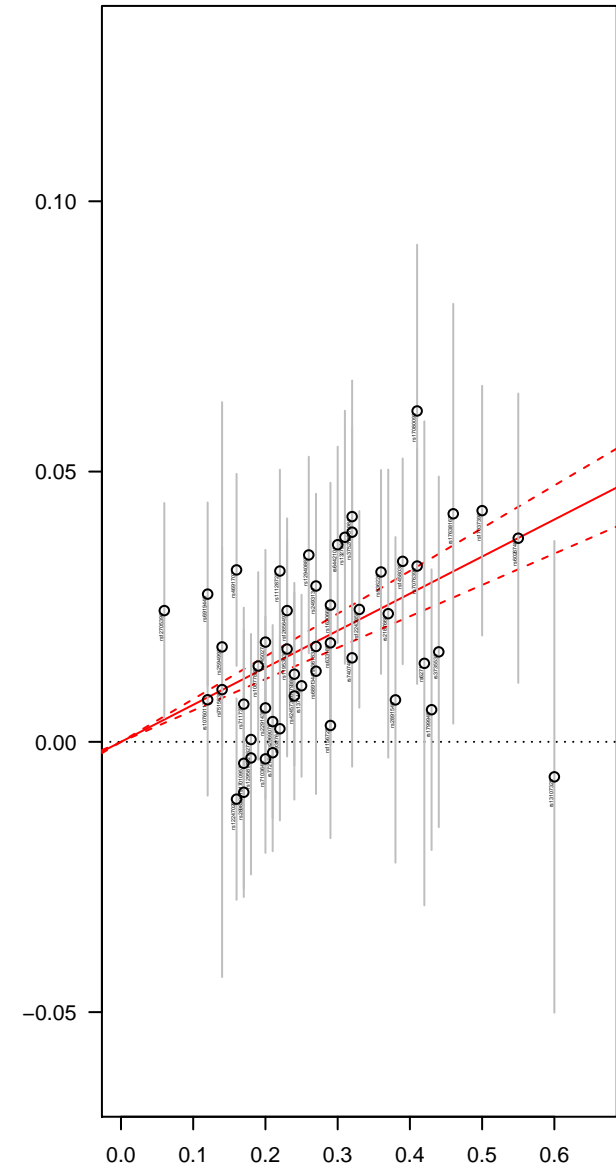

Supplementary Figures 10. Risk score analyses results for each SNP. The BP effect is on the x-axis, the outcome effect on the y-axis.

heart failure, SBP; all SNPs

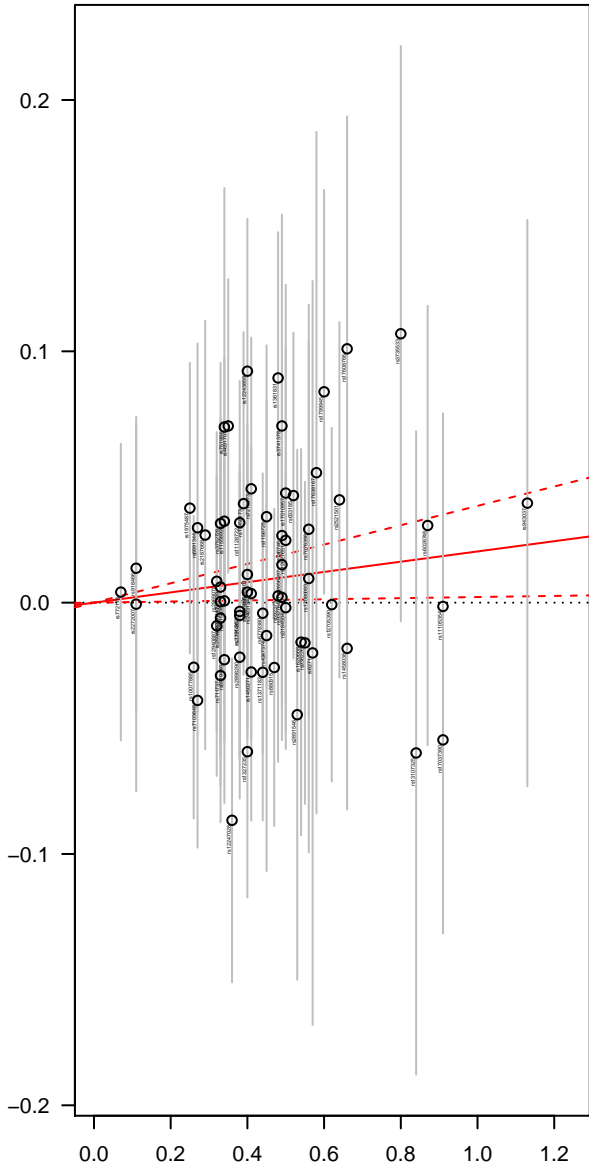

heart failure, SBP; 0 pruned

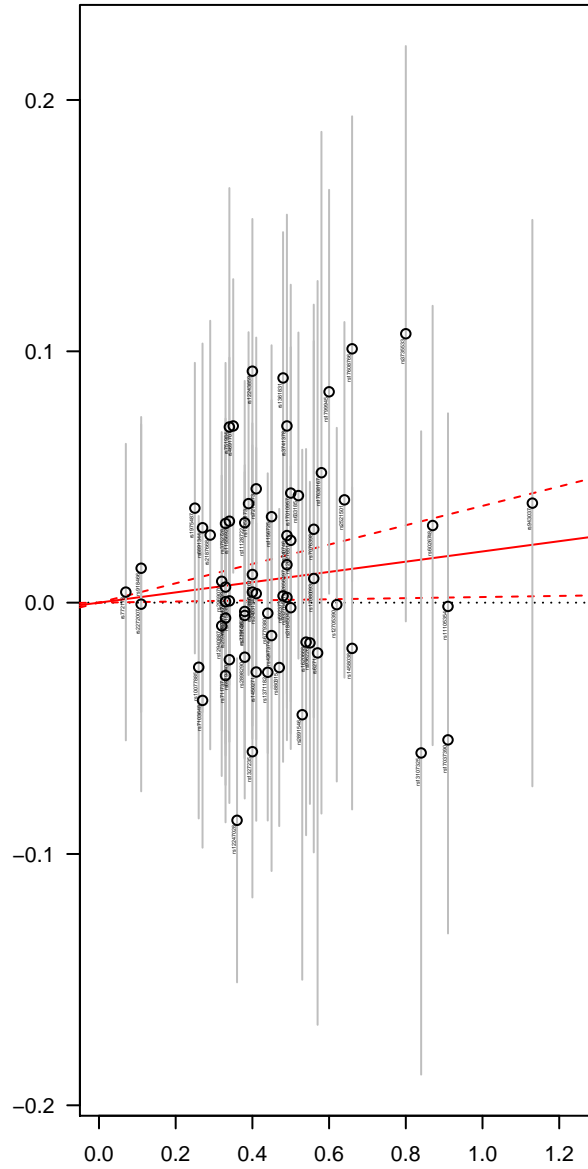

heart failure, DBP; all SNPs

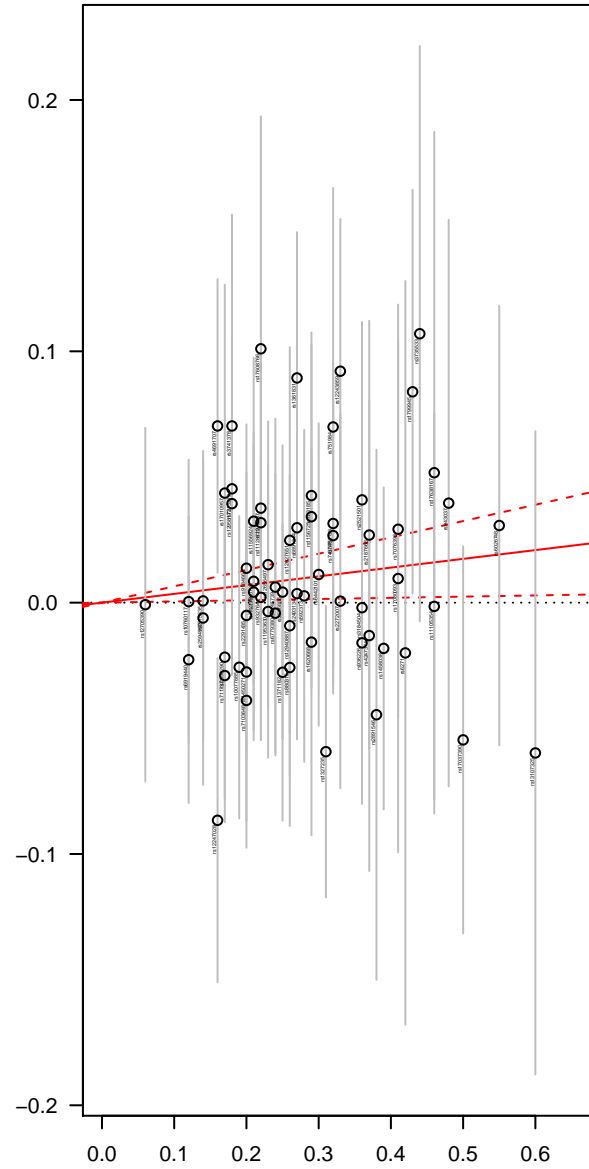

heart failure, DBP; 0 pruned

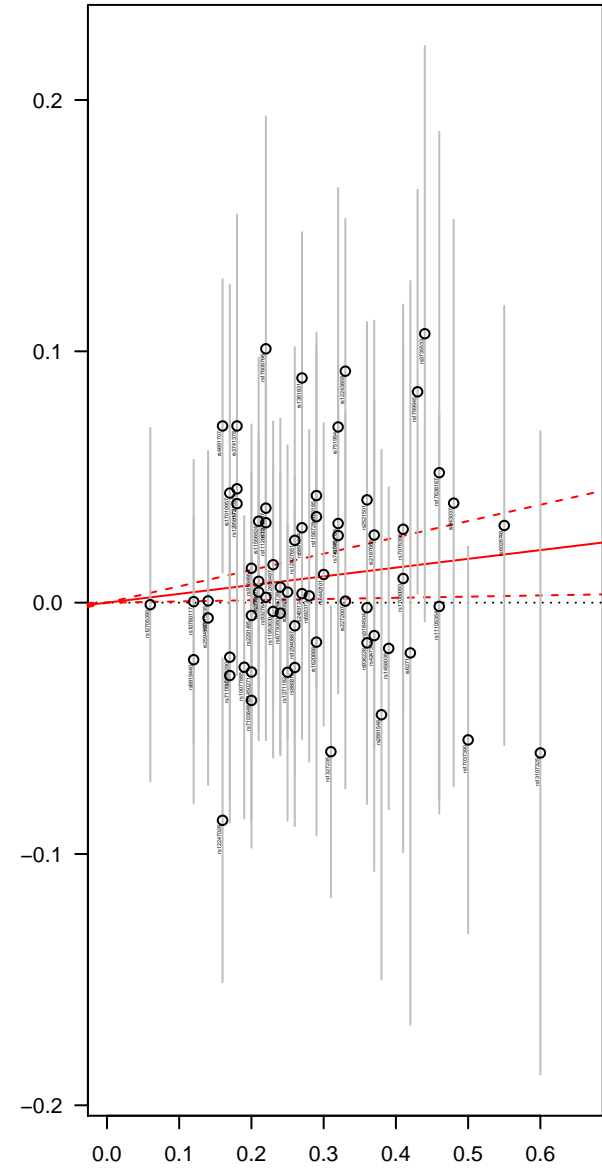

LV mass, SBP; all SNPs

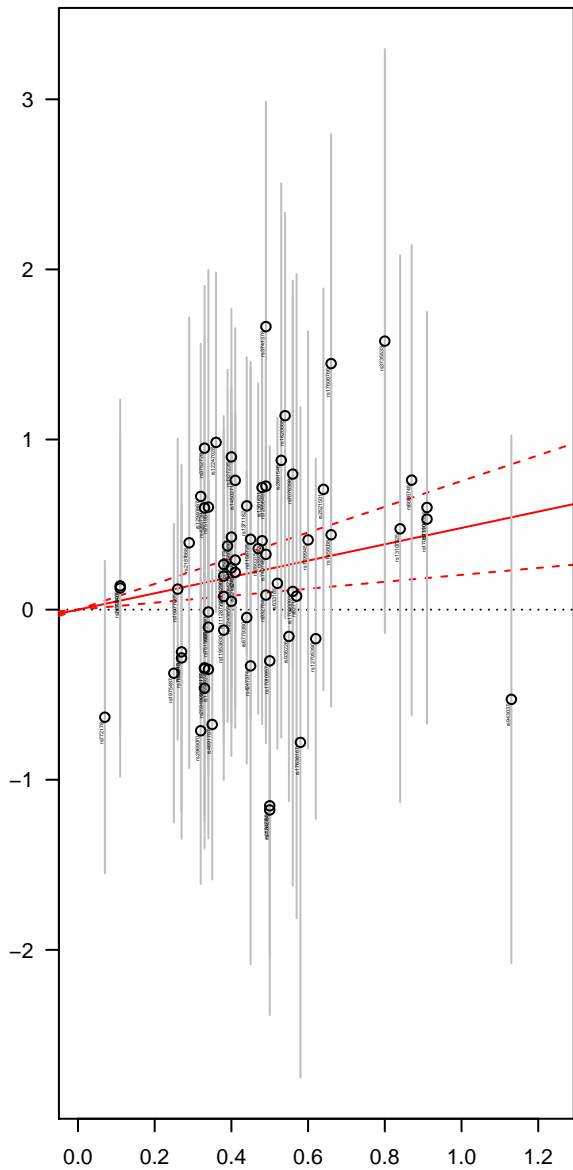

LV mass, SBP; 0 pruned

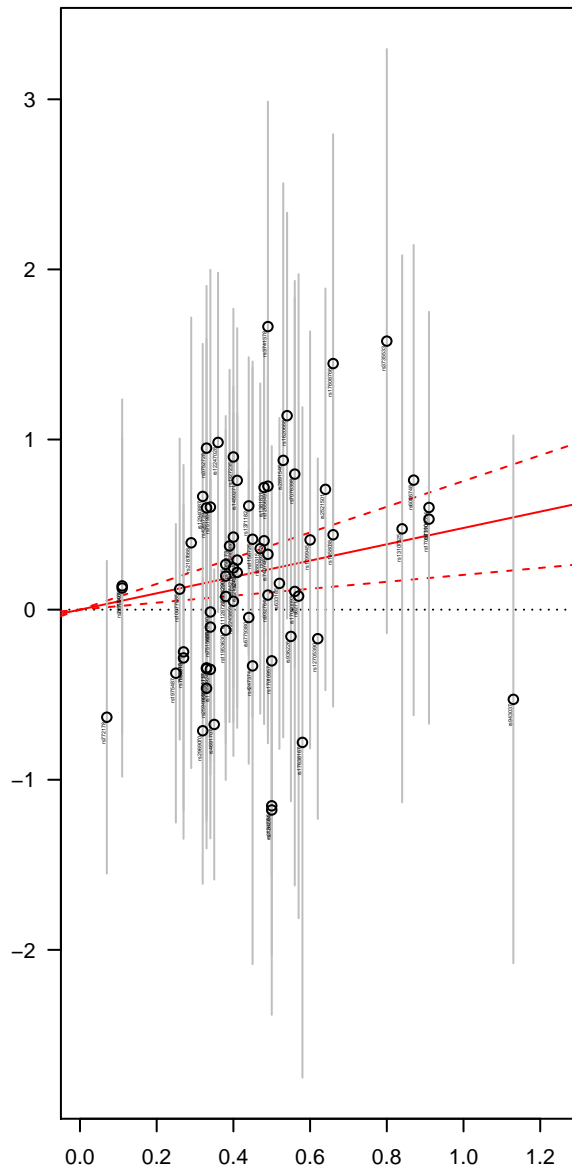

LV mass, DBP; all SNPs

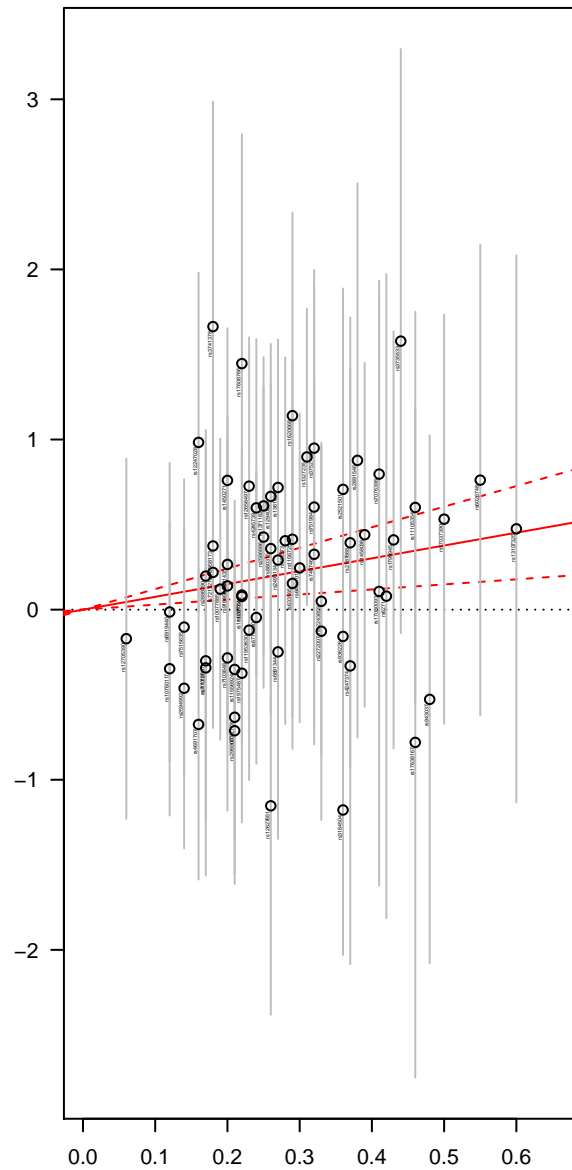

LV mass, DBP; 0 pruned

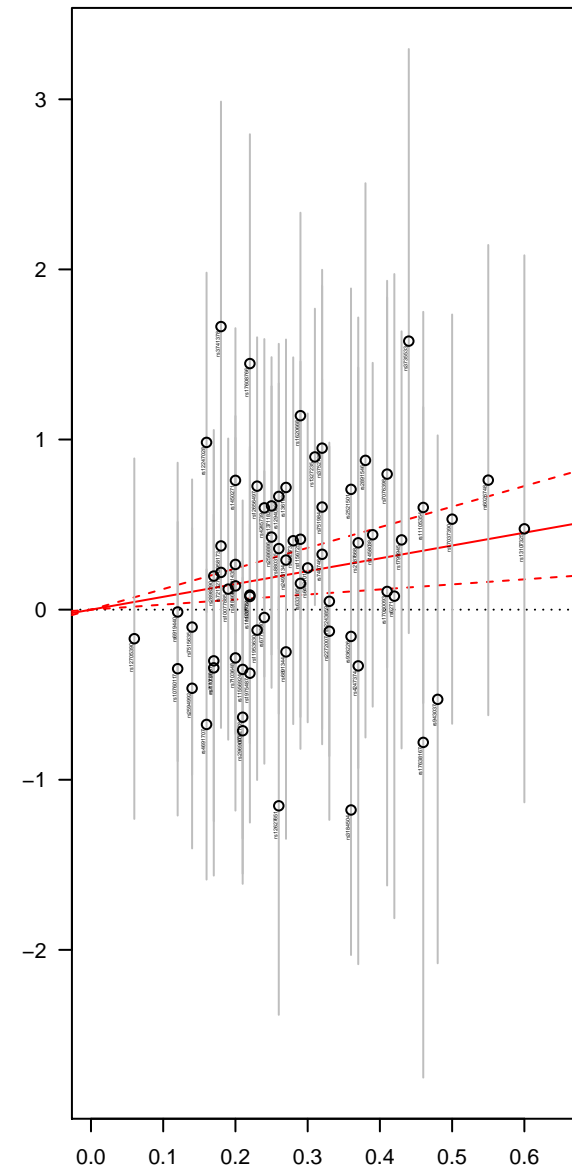

LV wall thickness, SBP; all SNPs

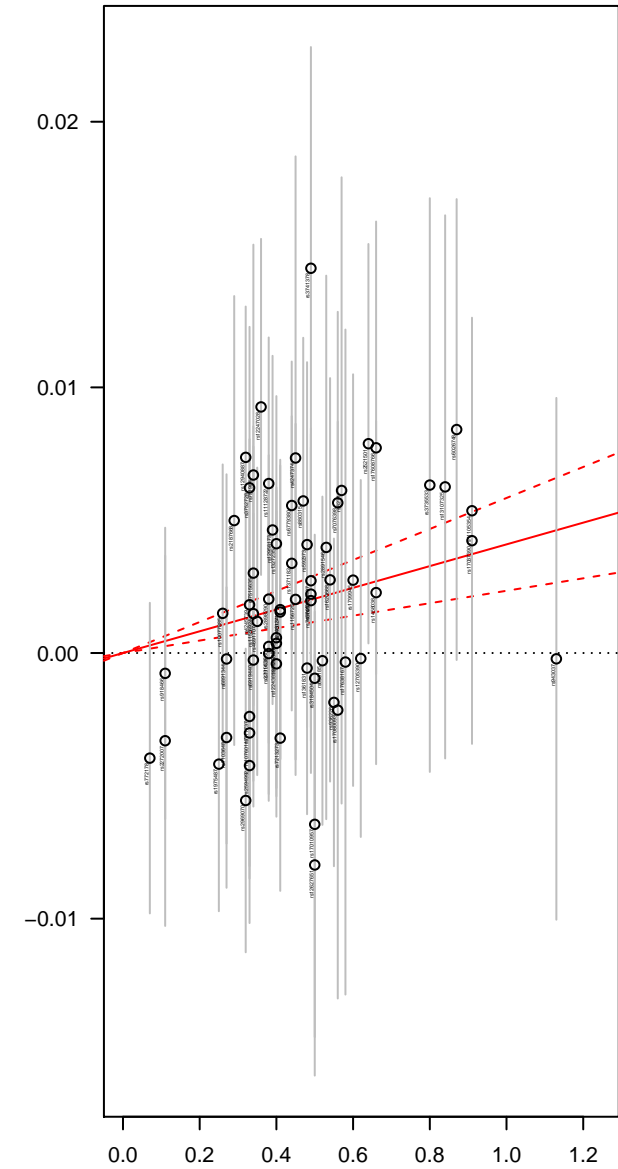

LV wall thickness, SBP; 0 pruned

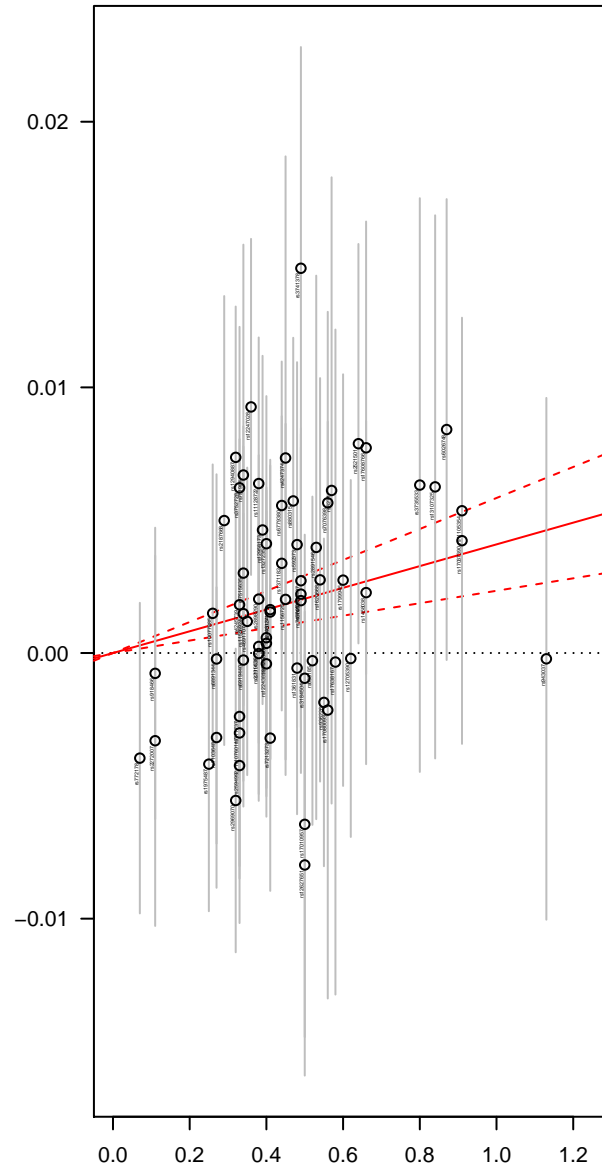

LV wall thickness, DBP; all SNPs

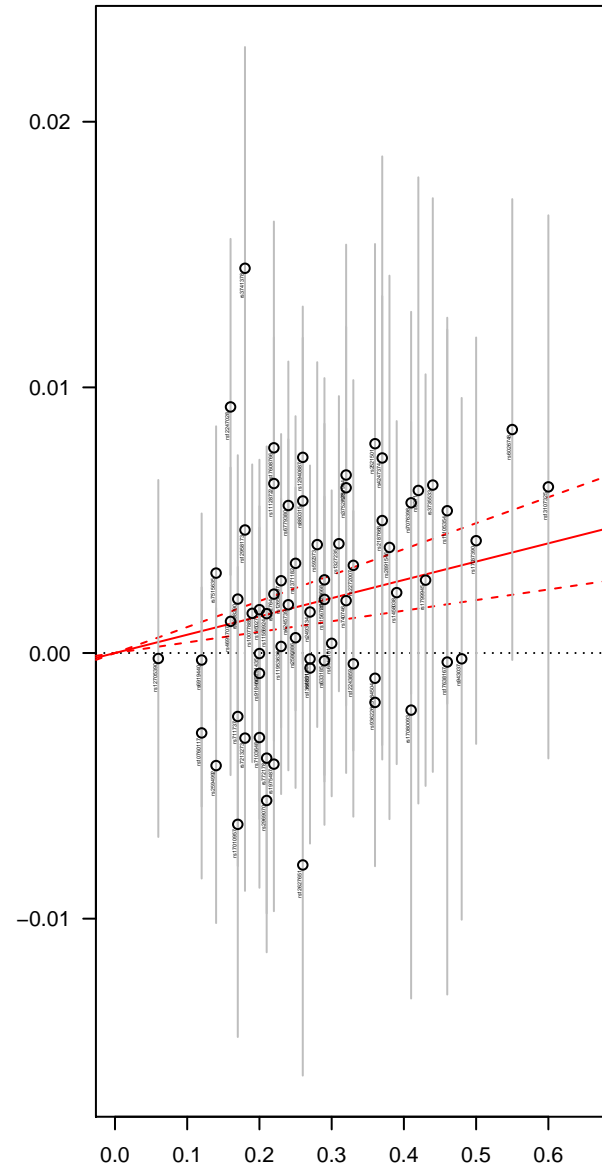

LV wall thickness, DBP; 0 pruned

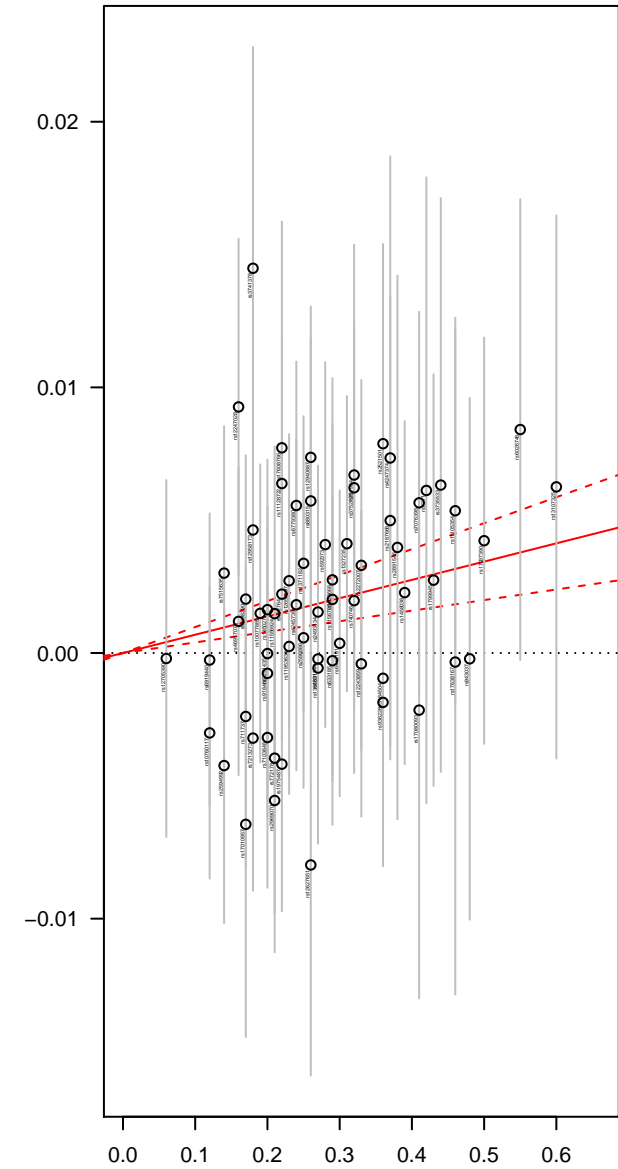



CKD, SBP; all SNPs

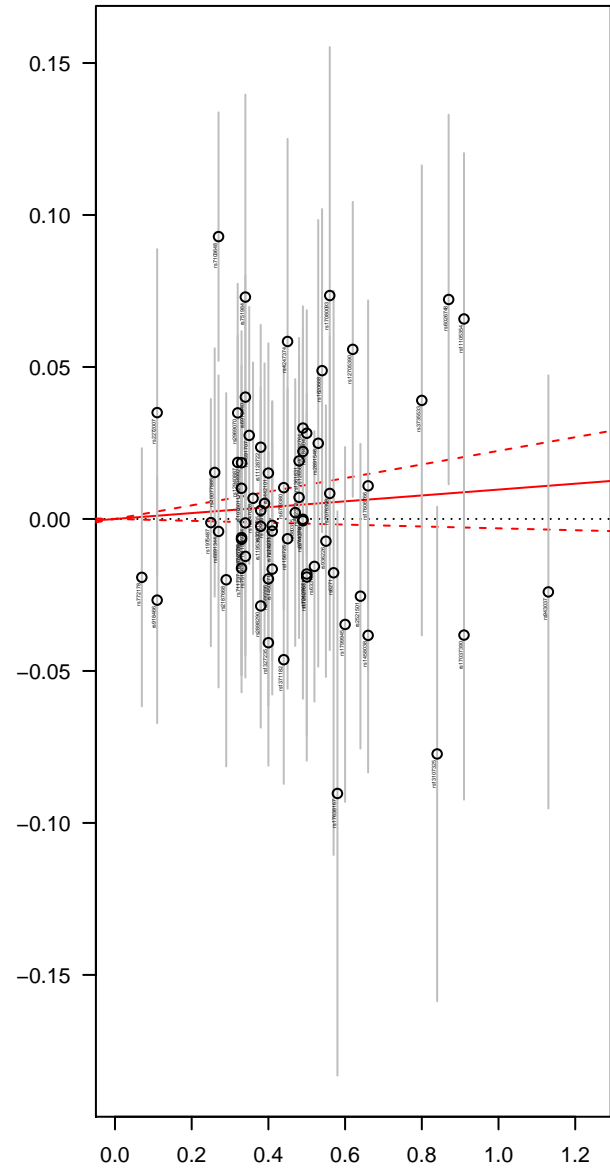

CKD, SBP; 1 pruned

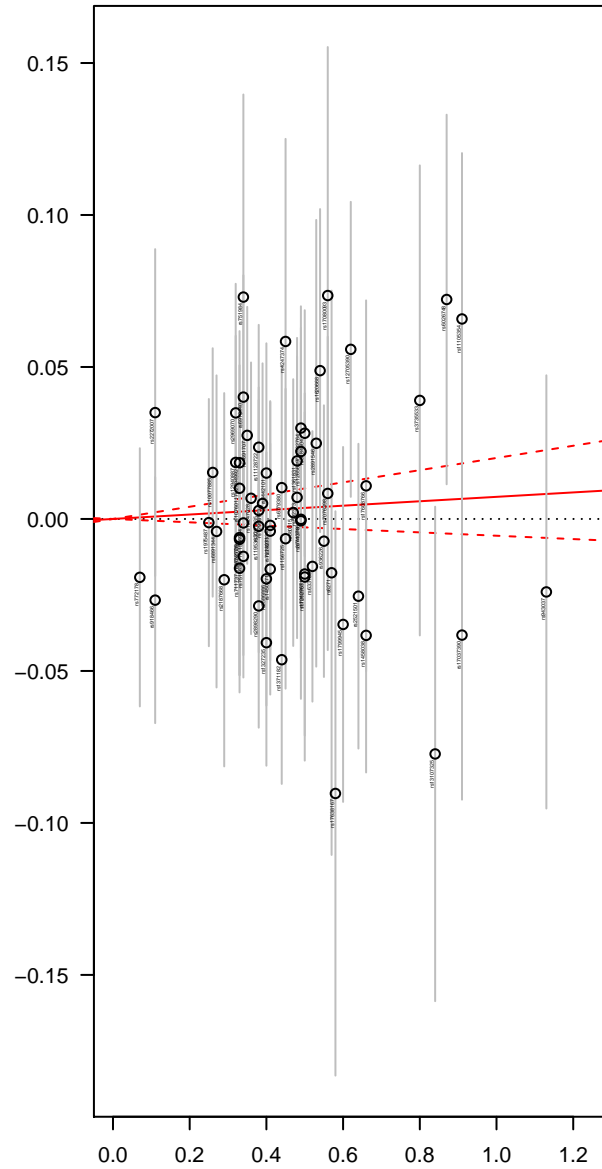

CKD, DBP; all SNPs

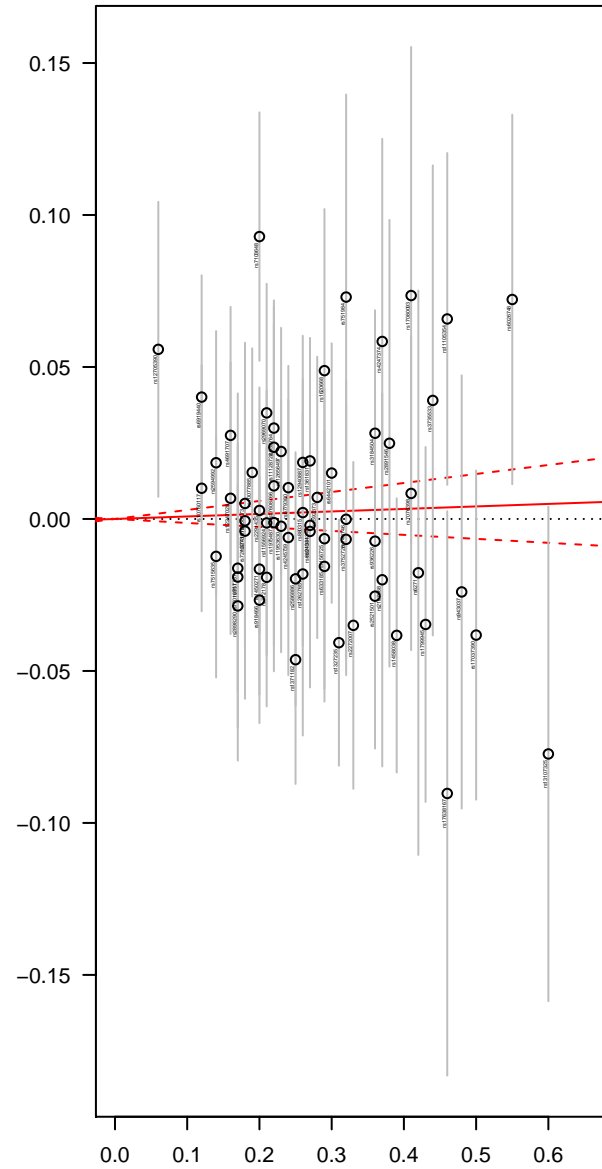

CKD, DBP; 1 pruned

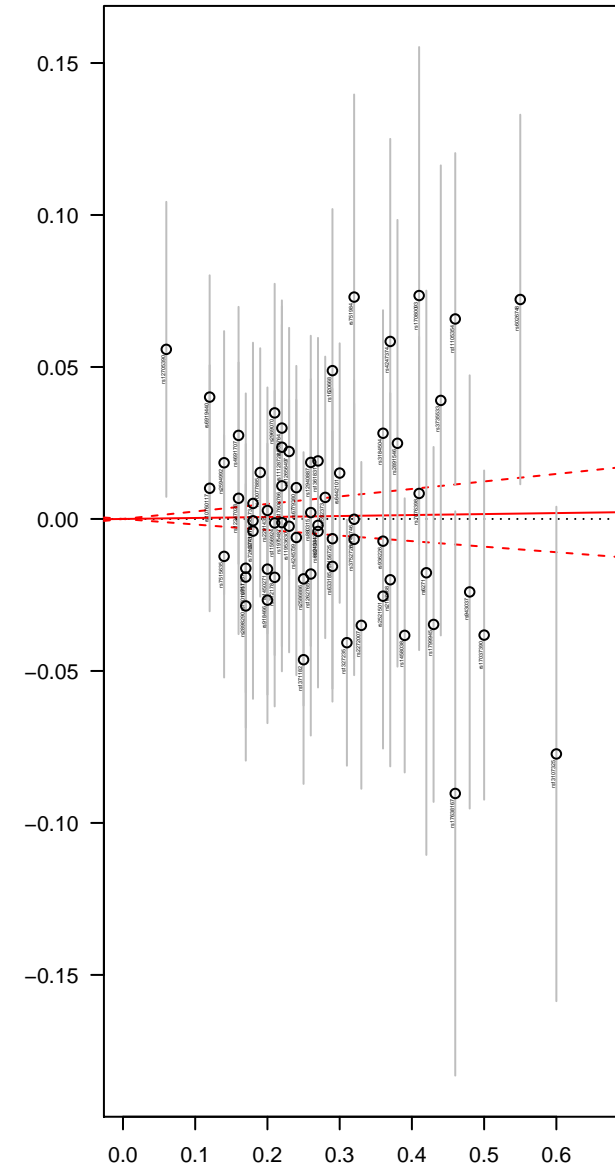

eGFR (based on cr), SBP; all SNPs

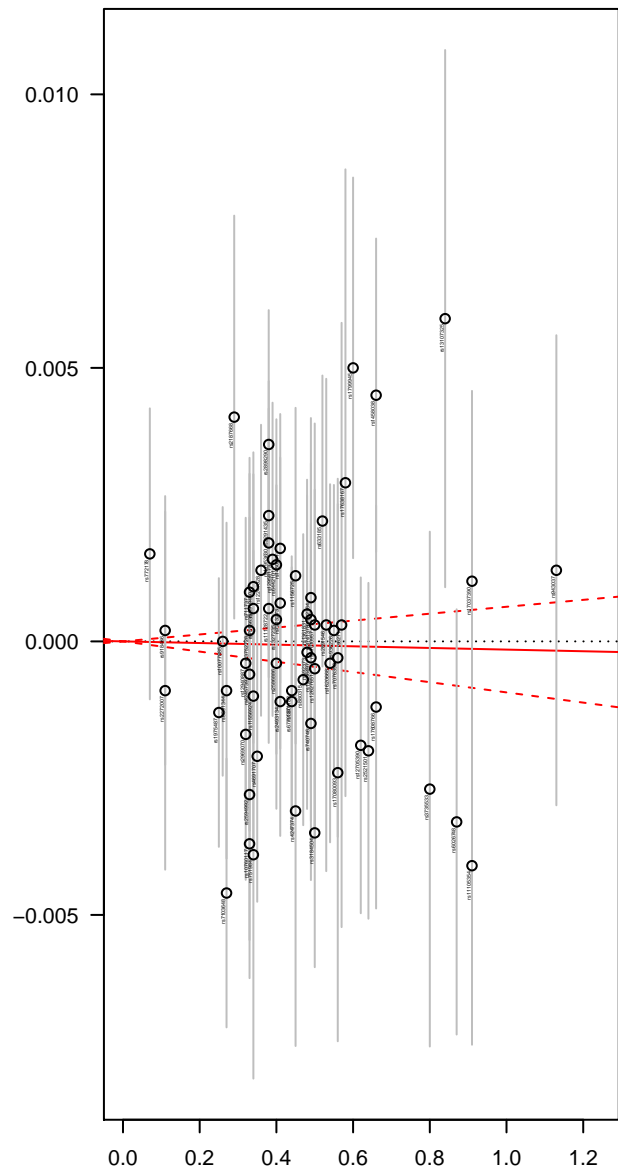

eGFR (based on cr), SBP; 2 pruned

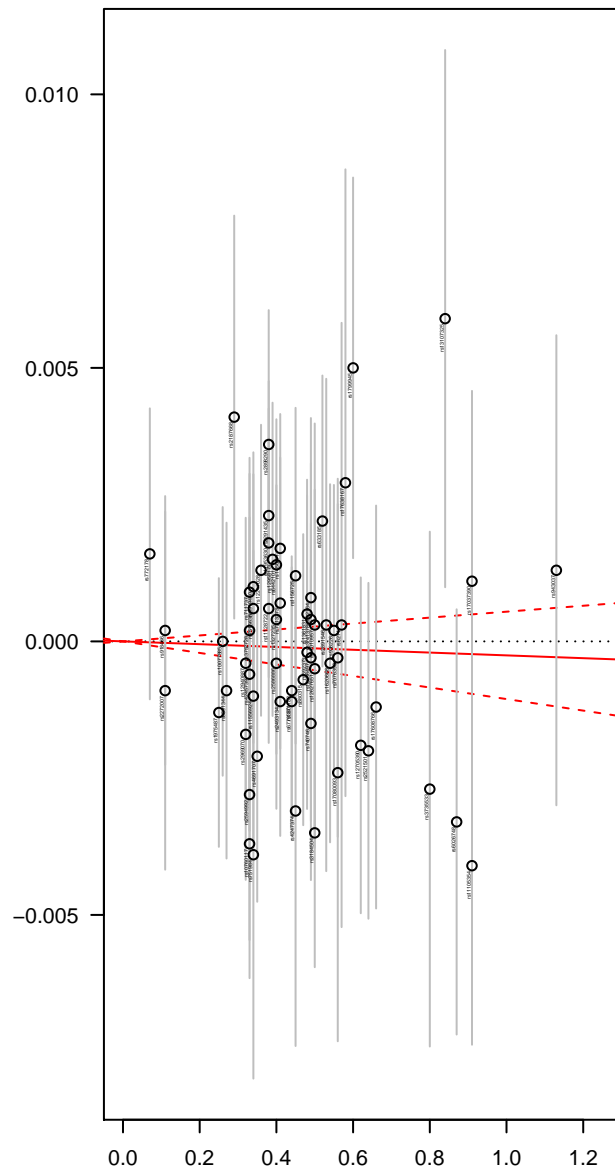

eGFR (based on cr), DBP; all SNPs

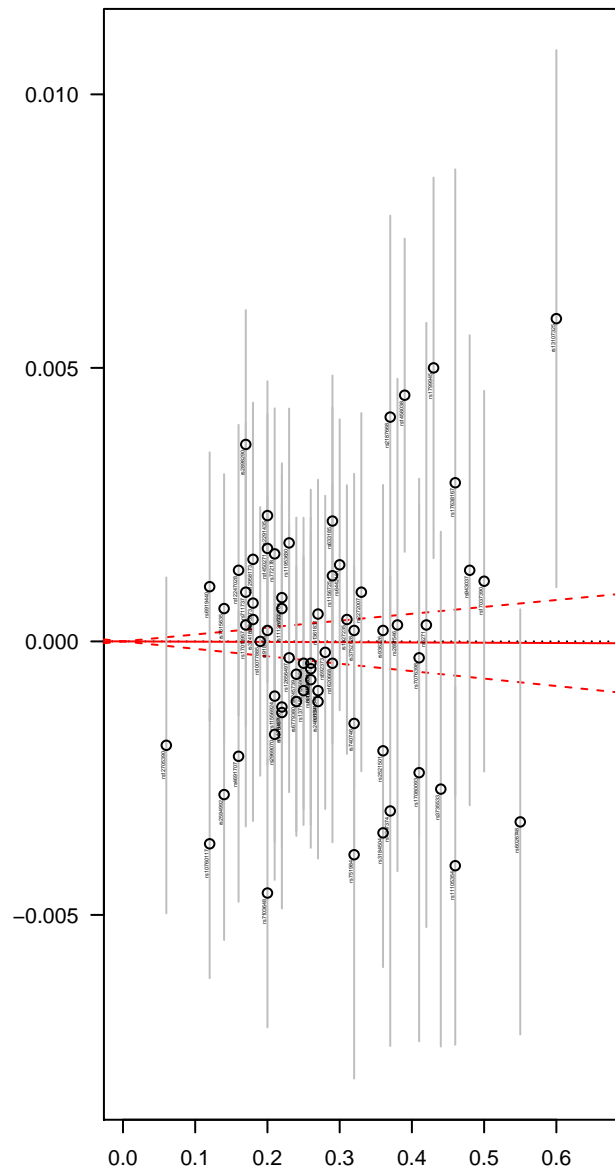

eGFR (based on cr), DBP; 2 pruned

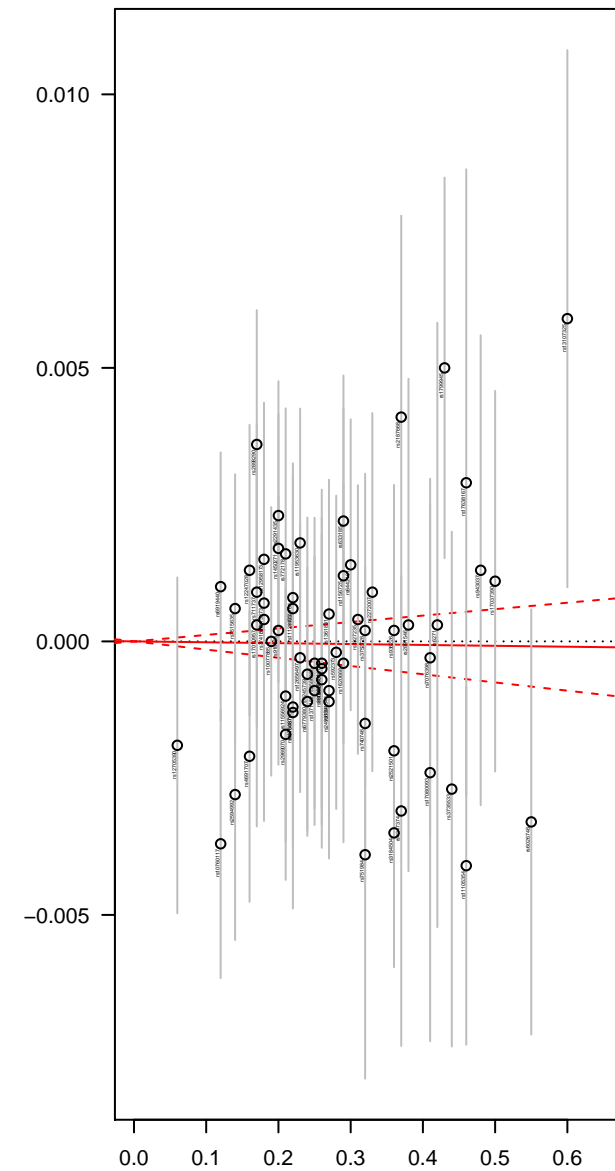

eGFR (based on cystatin), SBP; all SNPs

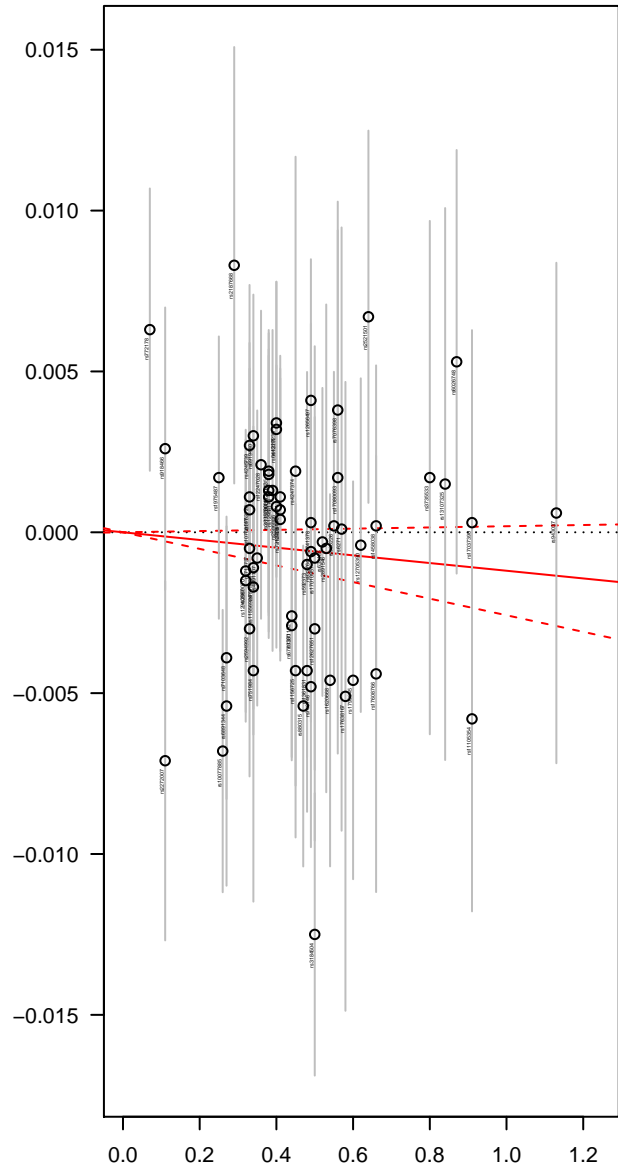

eGFR (based on cystatin), SBP; 1 pruned

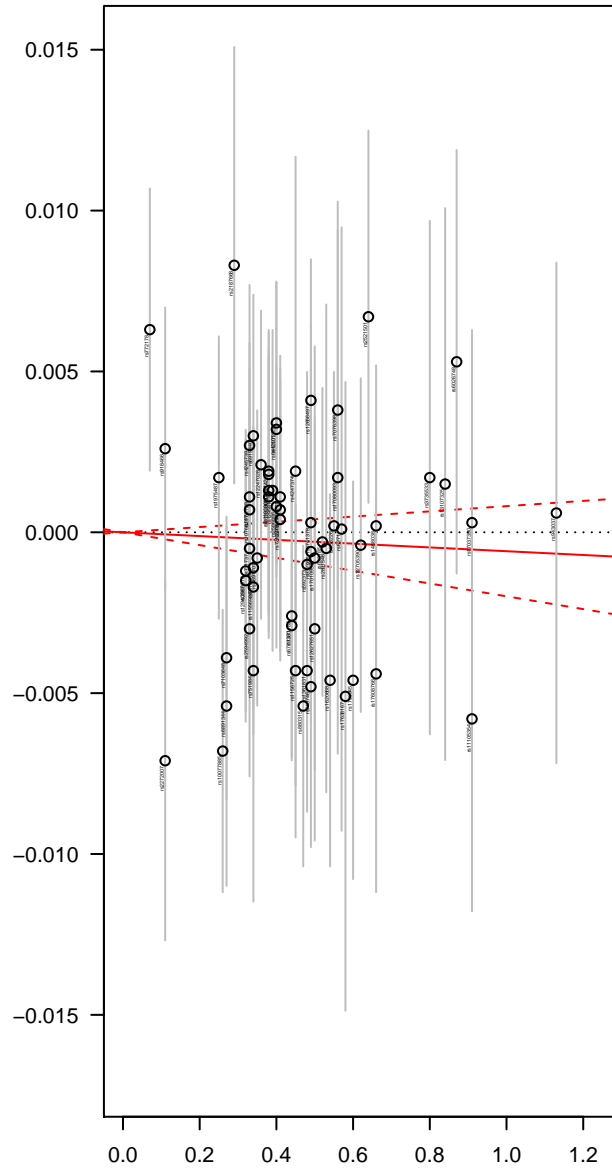

eGFR (based on cystatin), DBP; all SNPs

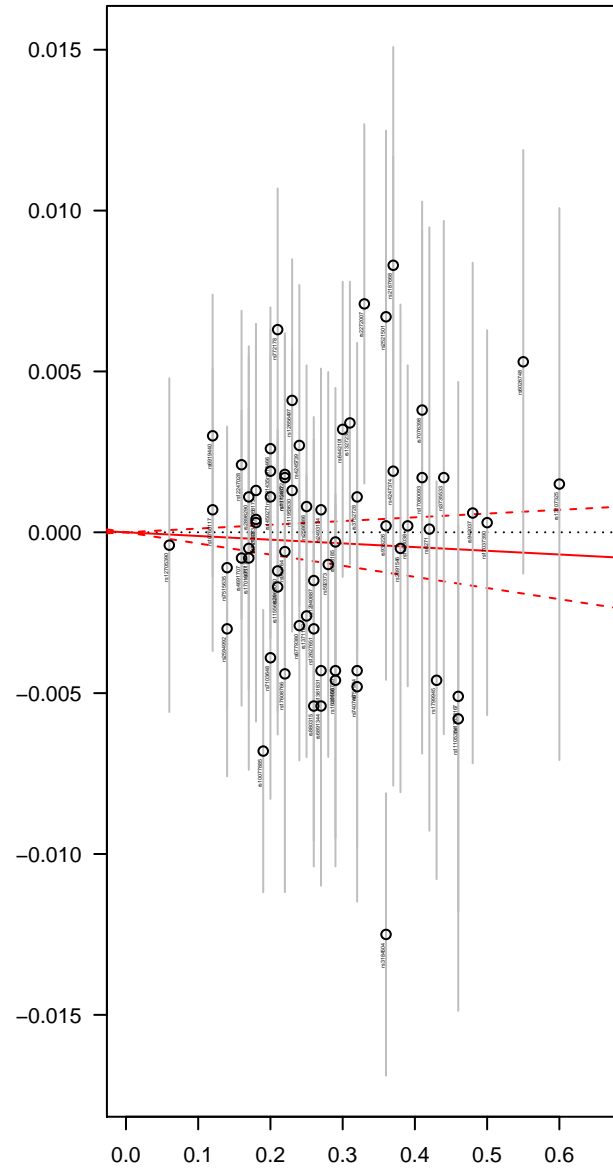

eGFR (based on cystatin), DBP; 1 pruned

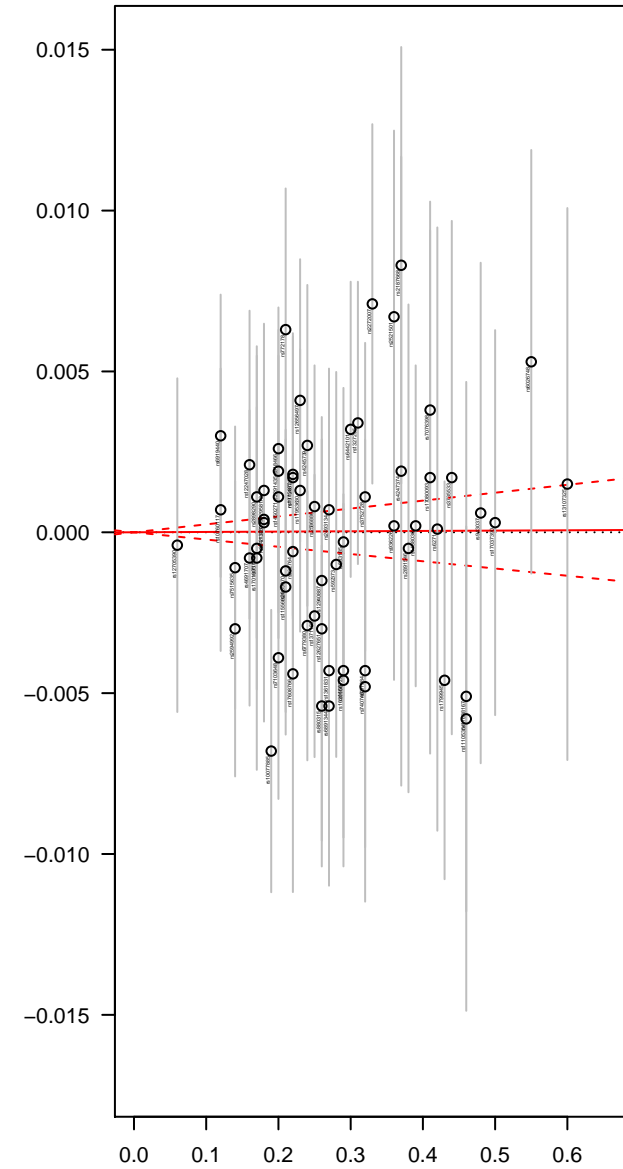

creatinine, SBP; all SNPs

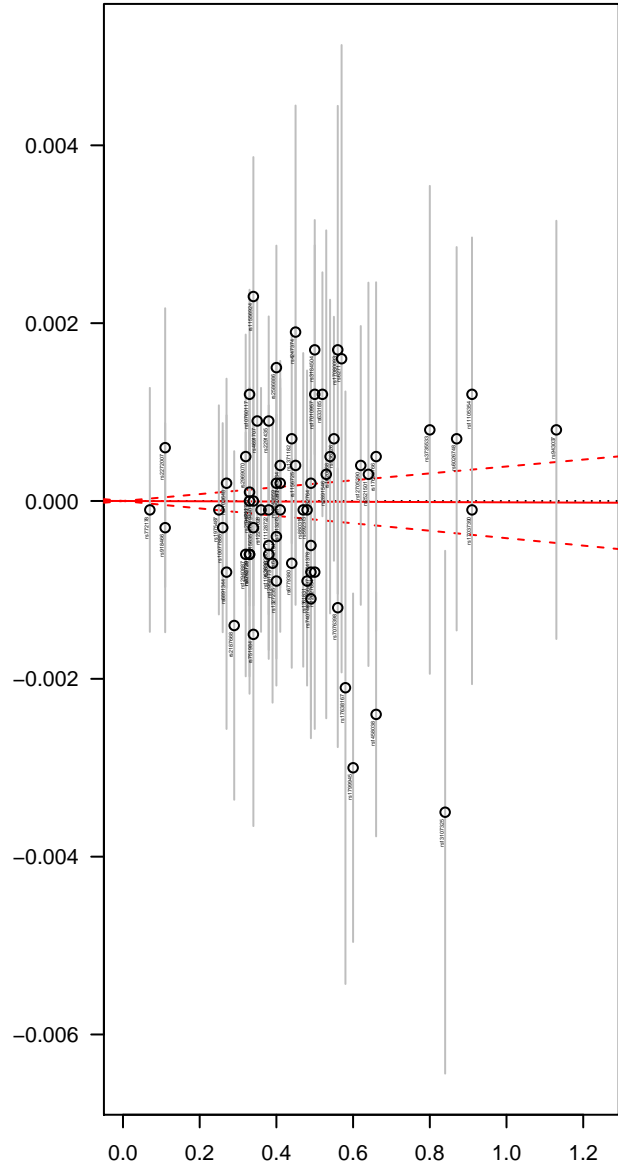

creatinine, SBP; 0 pruned

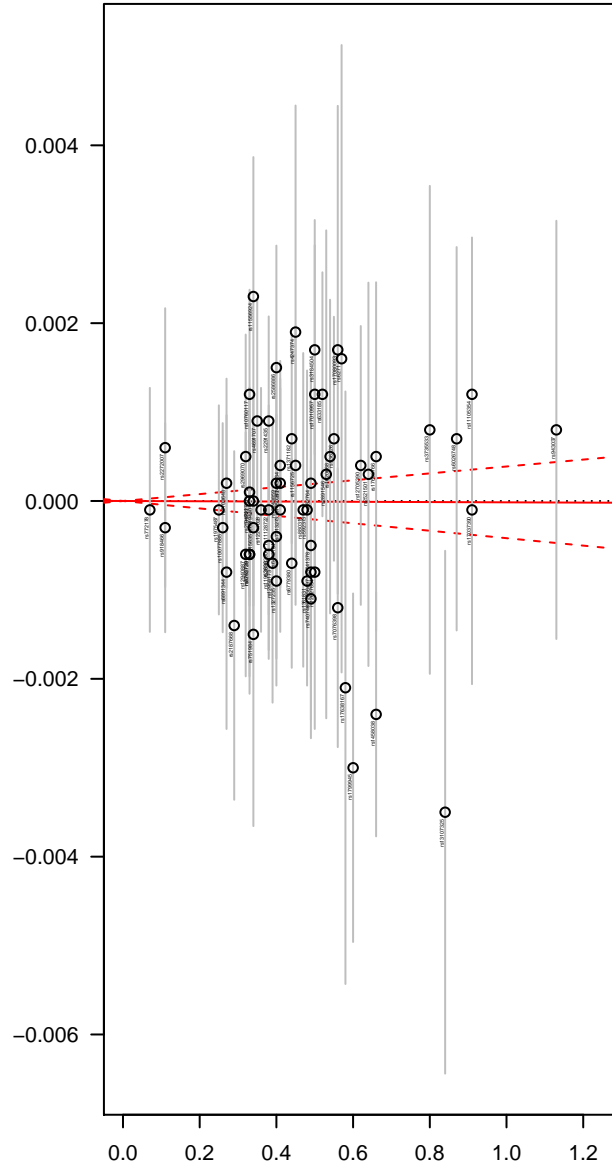

creatinine, DBP; all SNPs

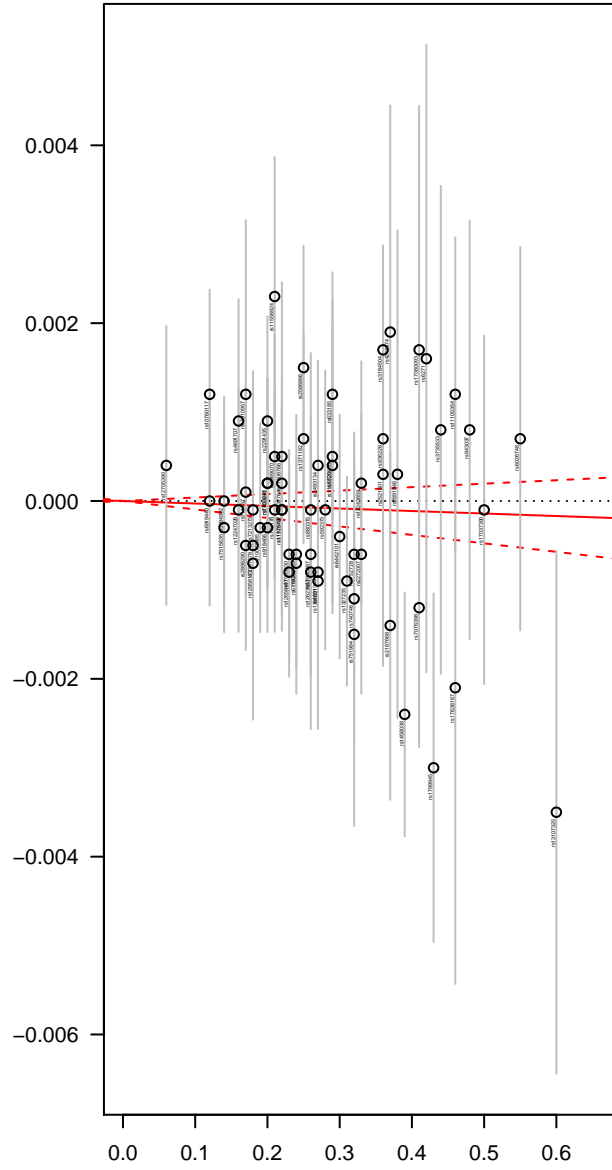

creatinine, DBP; 0 pruned

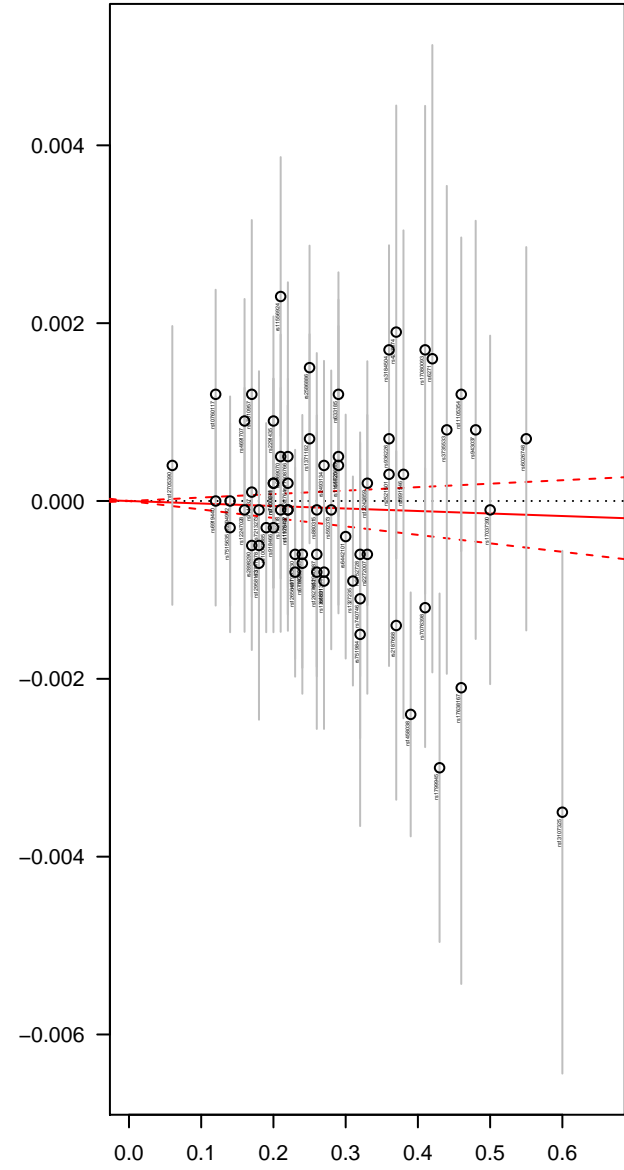

microalbuminuria, SBP; all SNPs

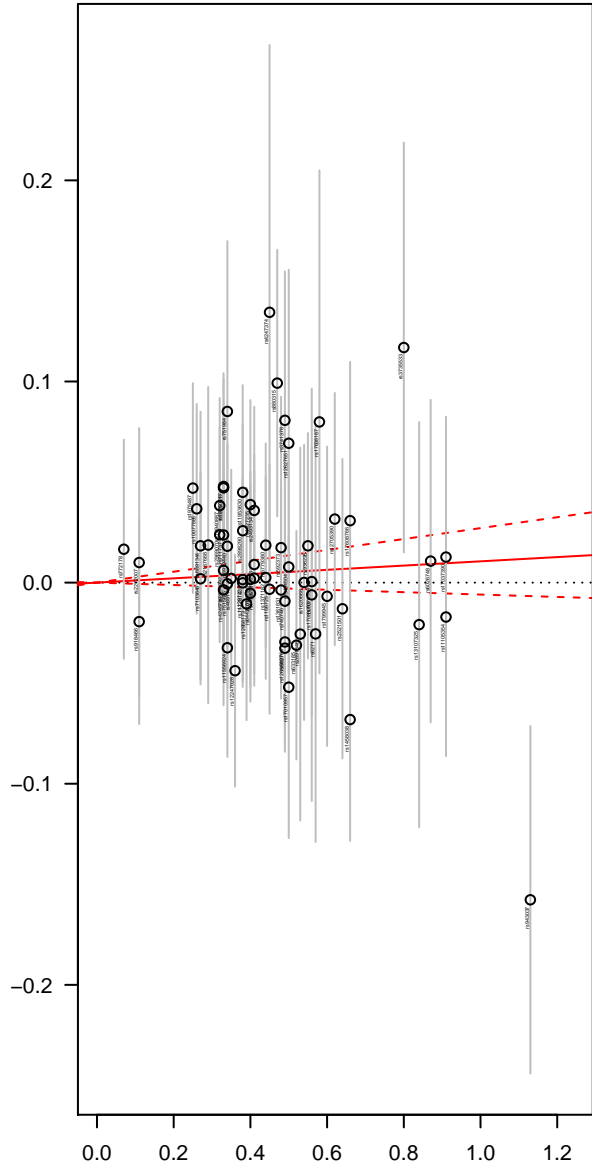

microalbuminuria, SBP; 0 pruned

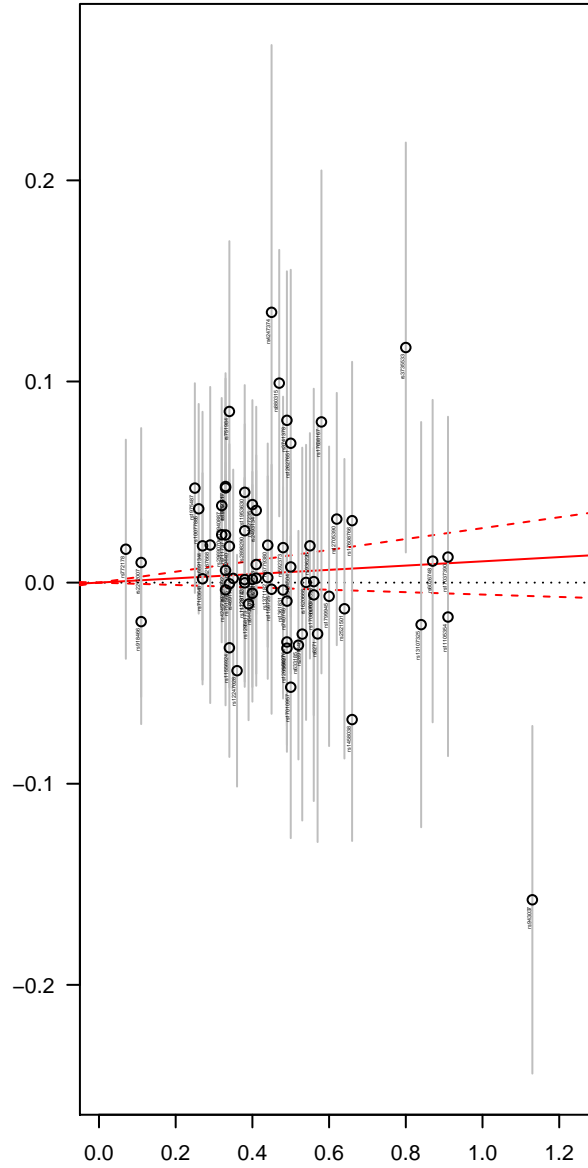

microalbuminuria, DBP; all SNPs

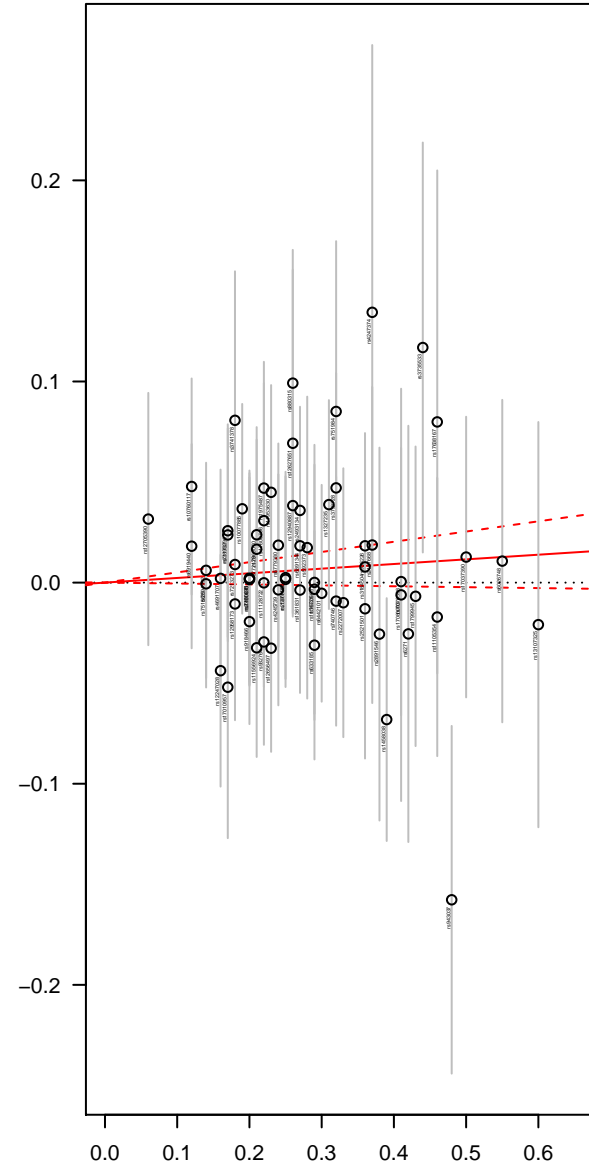

microalbuminuria, DBP; 0 pruned

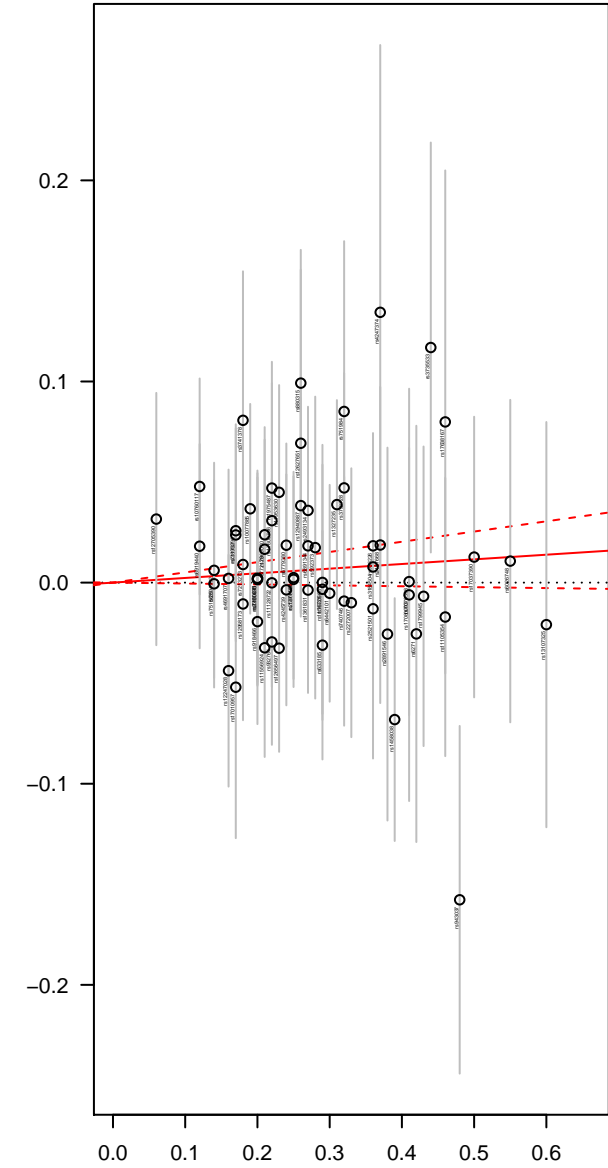

urinary albumin/cr ratio, SBP; all SNPs

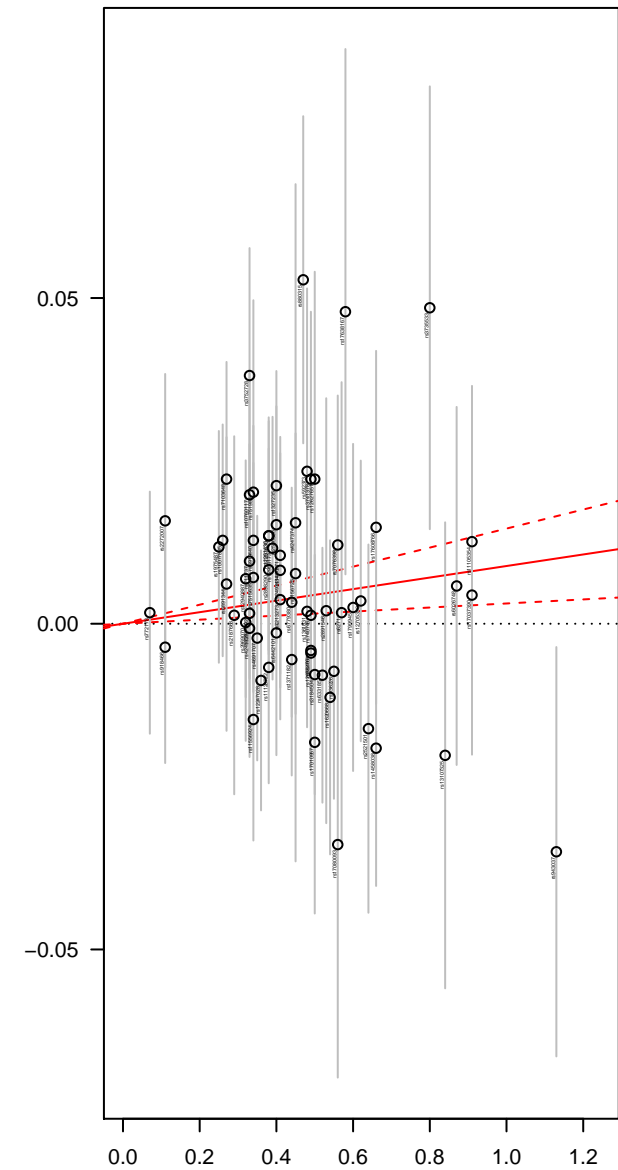

urinary albumin/cr ratio, SBP; 1 pruned

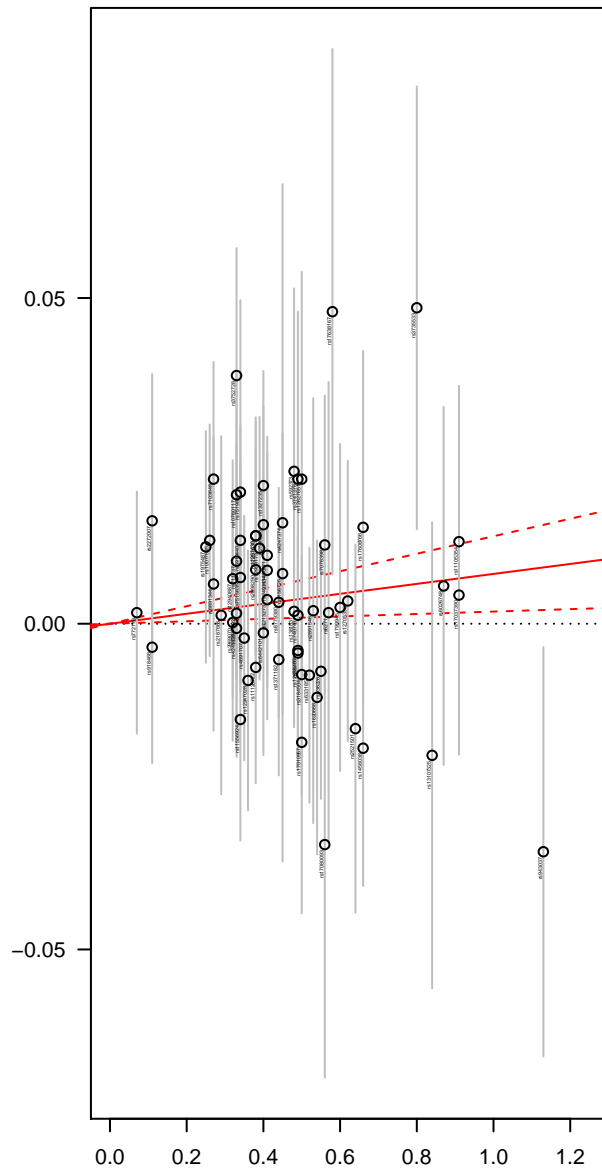

urinary albumin/cr ratio, DBP; all SNPs

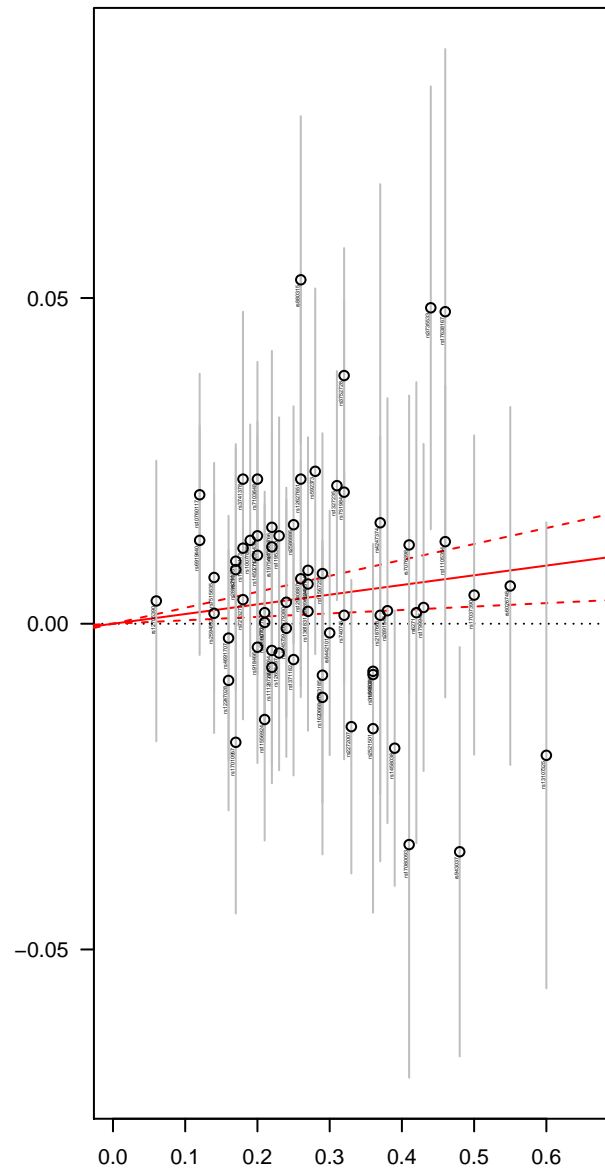

urinary albumin/cr ratio, DBP; 1 pruned

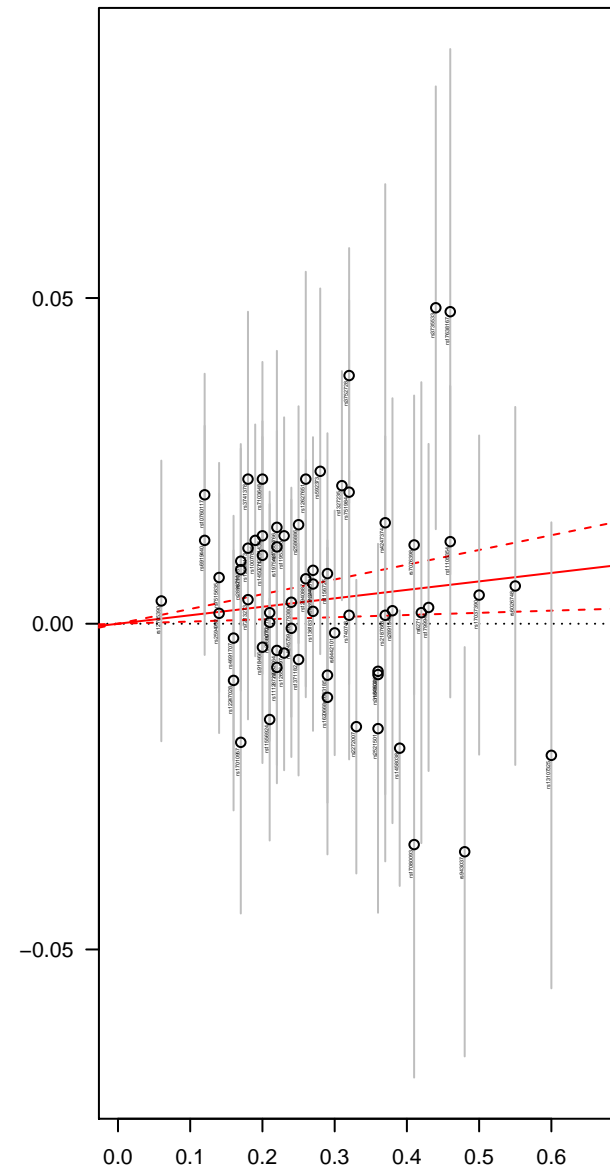

stroke, all subtypes, SBP; all SNPs

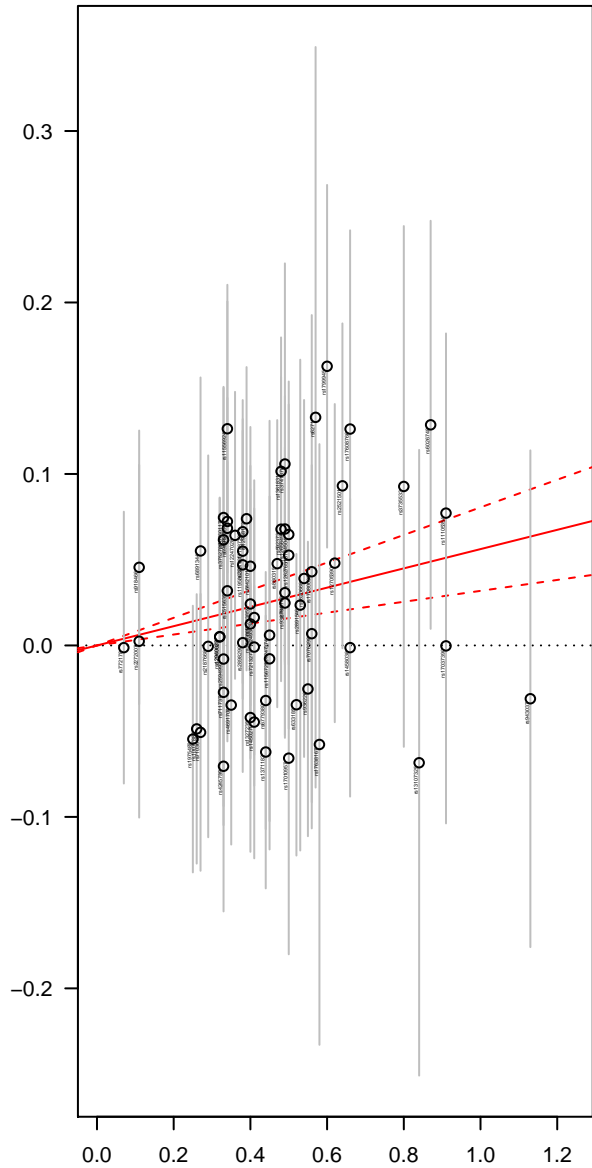

stroke, all subtypes, SBP; 0 pruned

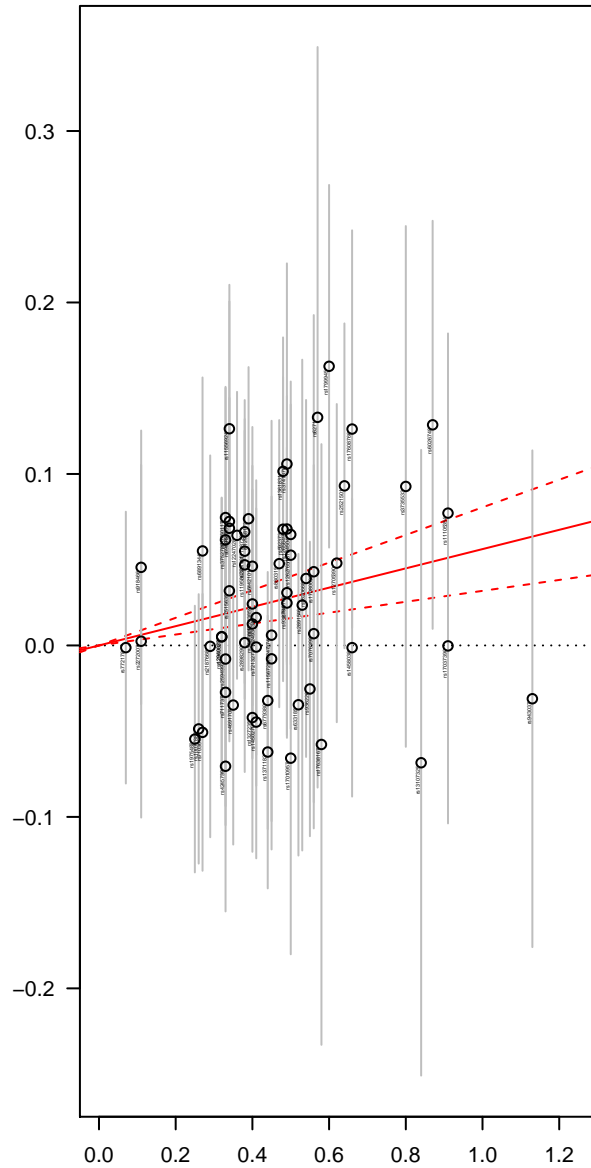

stroke, all subtypes, DBP; all SNPs

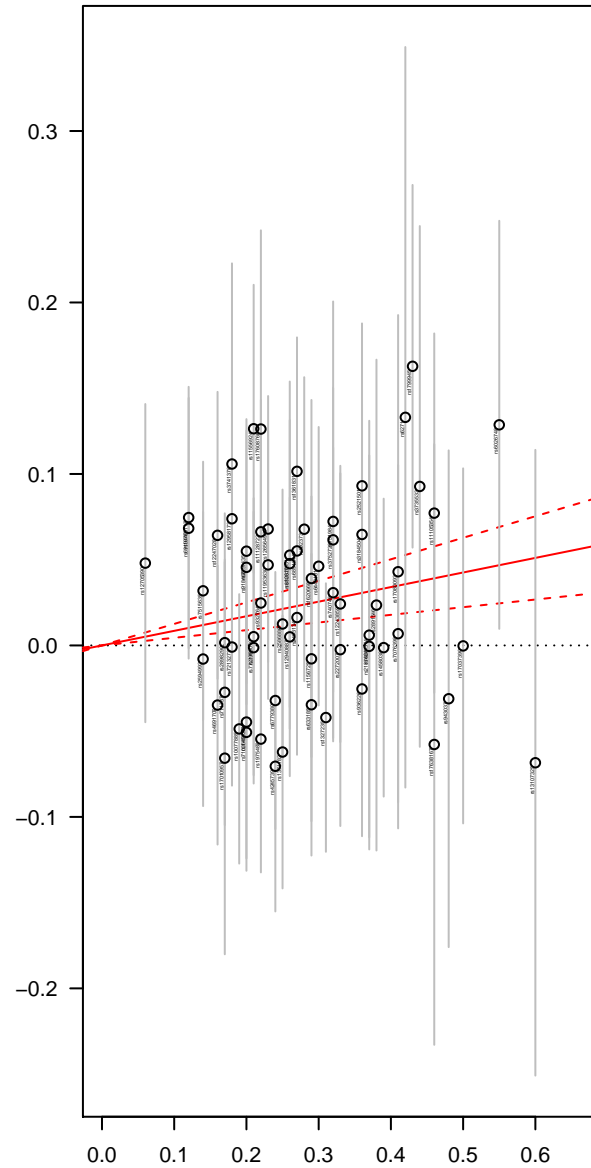

stroke, all subtypes, DBP; 0 pruned

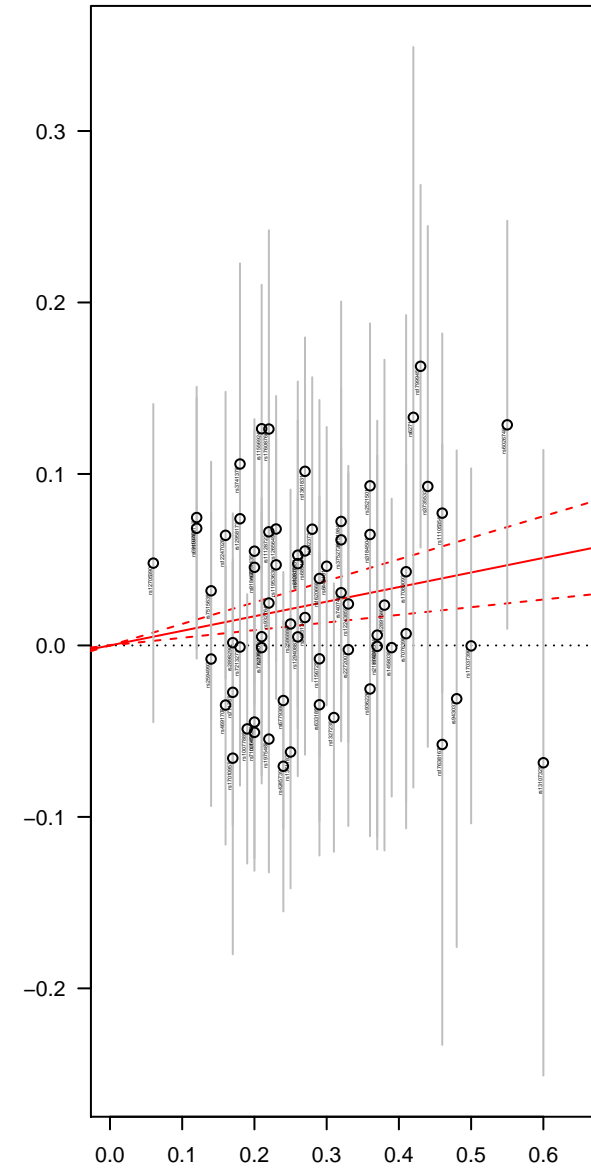

stroke, ischemic subtype [C], SBP; all SNPs

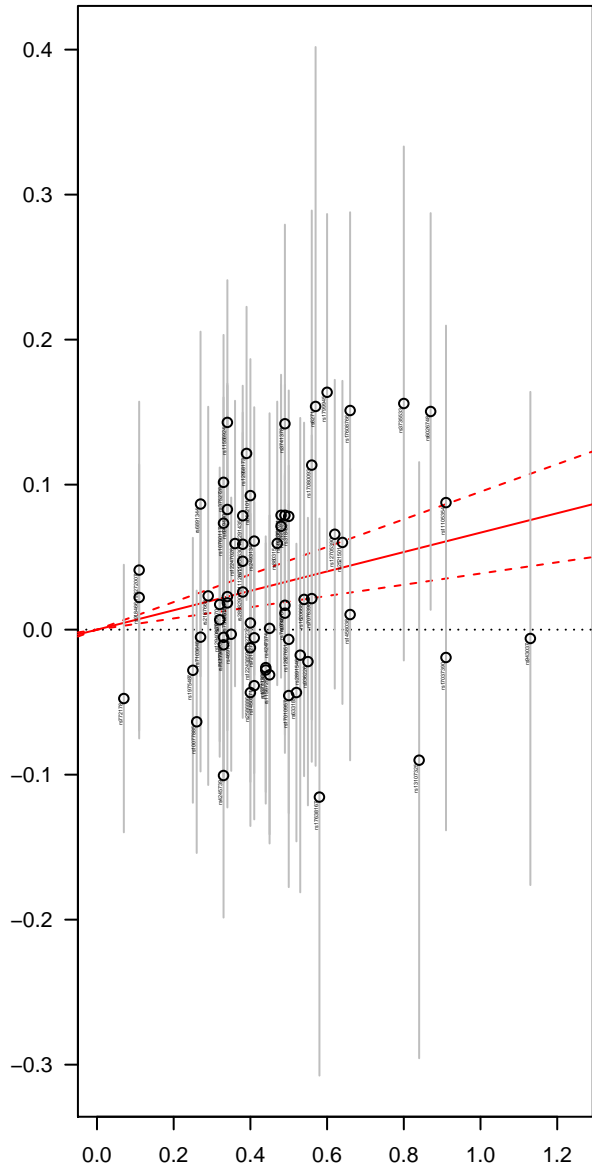

stroke, ischemic subtype [C], SBP; 0 pruned

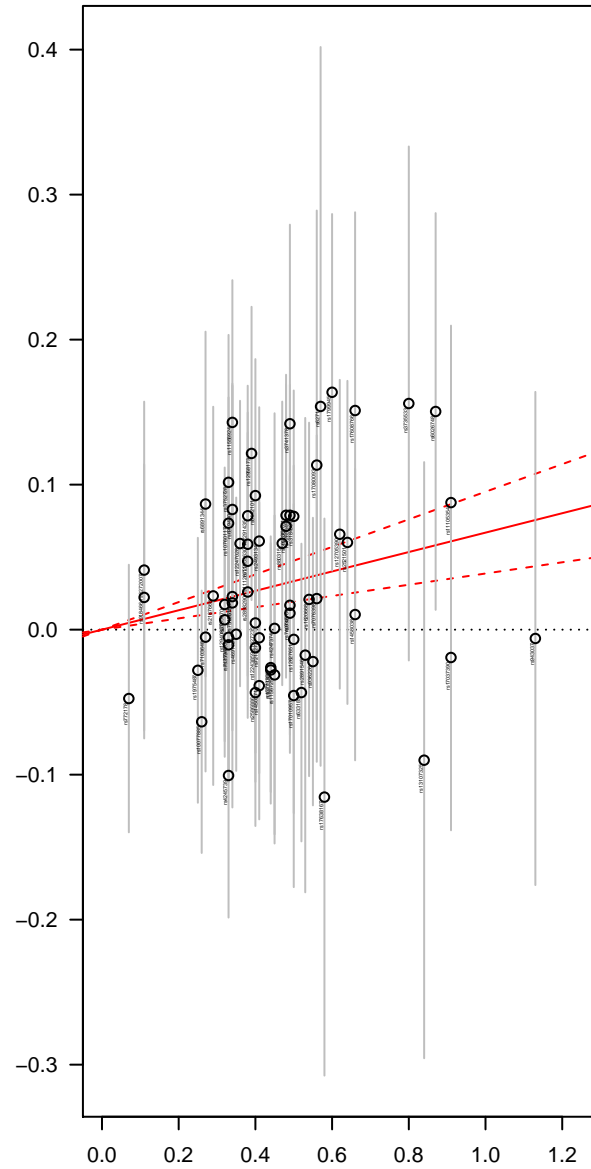

stroke, ischemic subtype [C], DBP; all SNPs

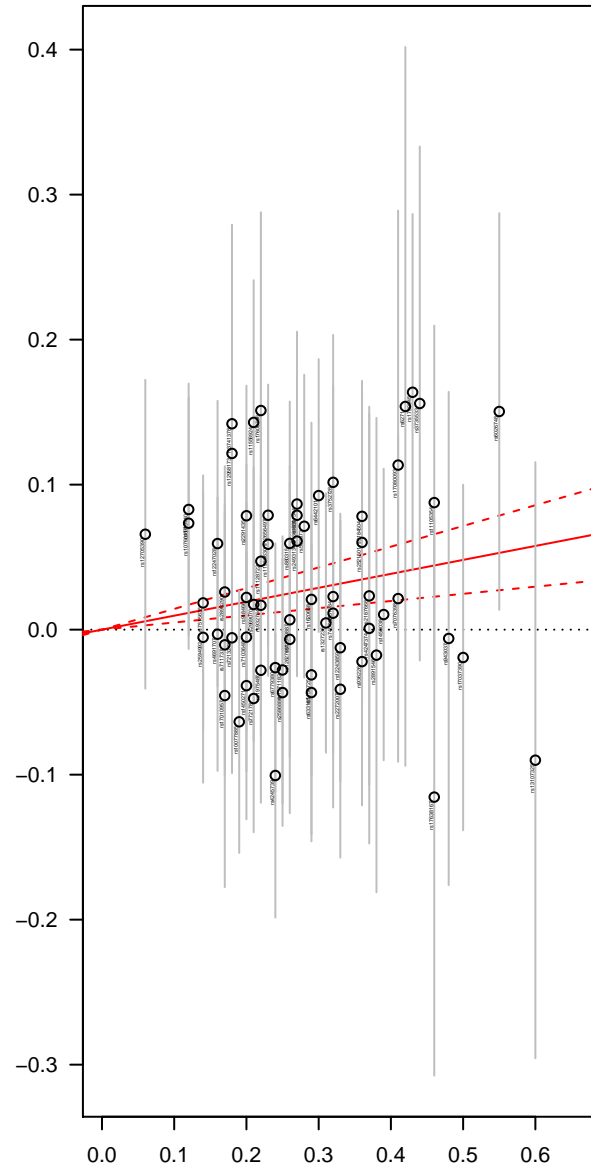

stroke, ischemic subtype [C], DBP; 0 pruned

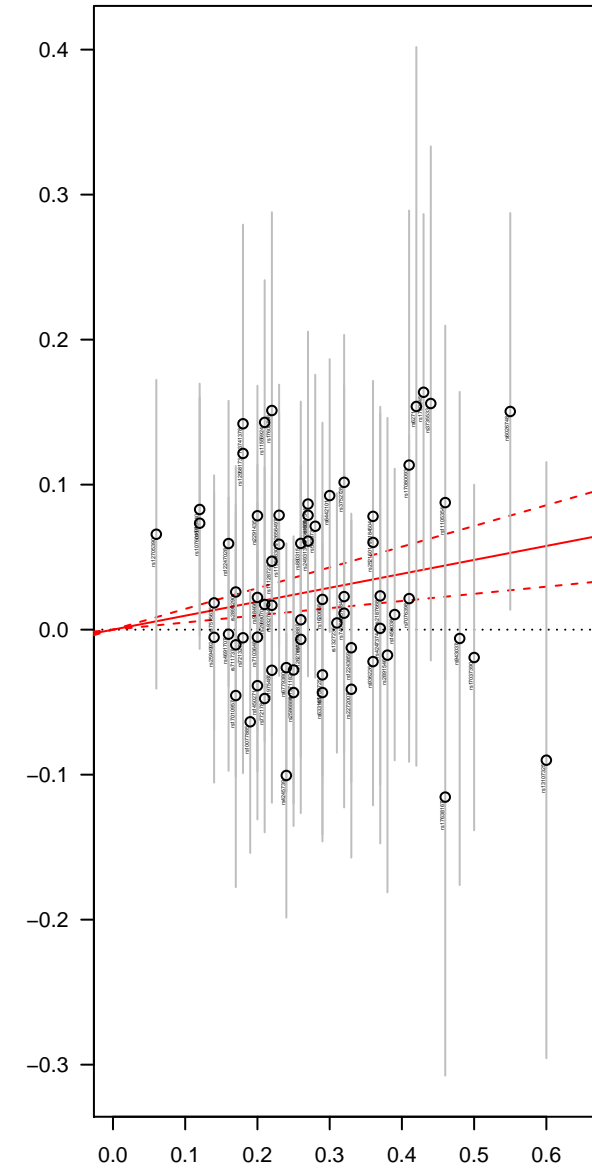



stroke, ischemic subtype [M], SBP; all SNPs

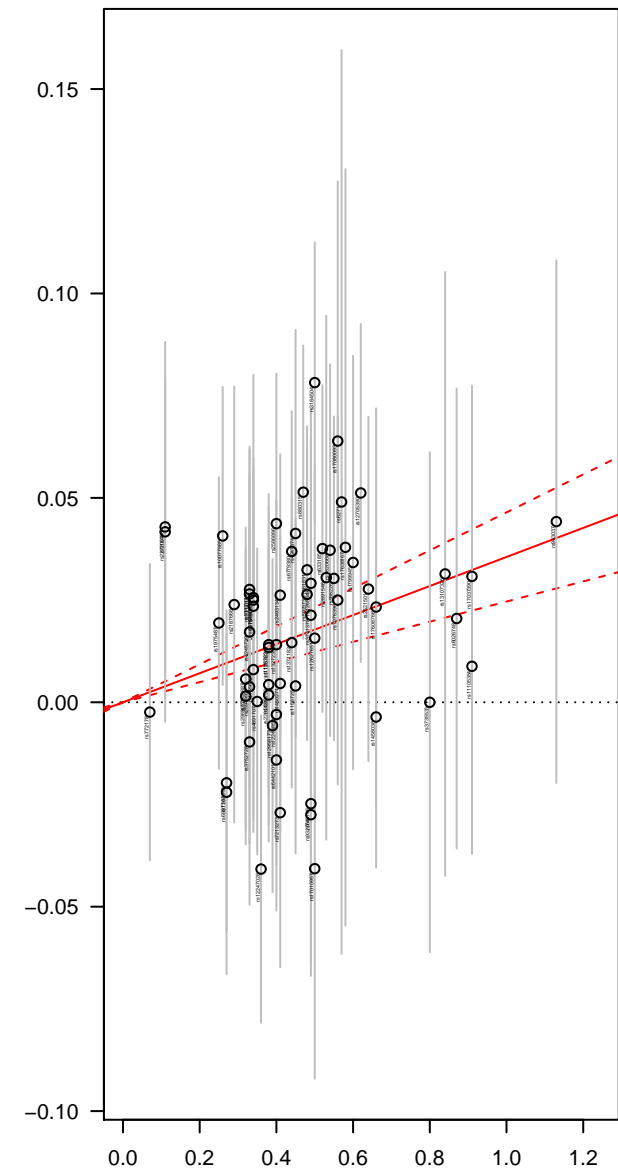

stroke, ischemic subtype [M], SBP; 0 pruned

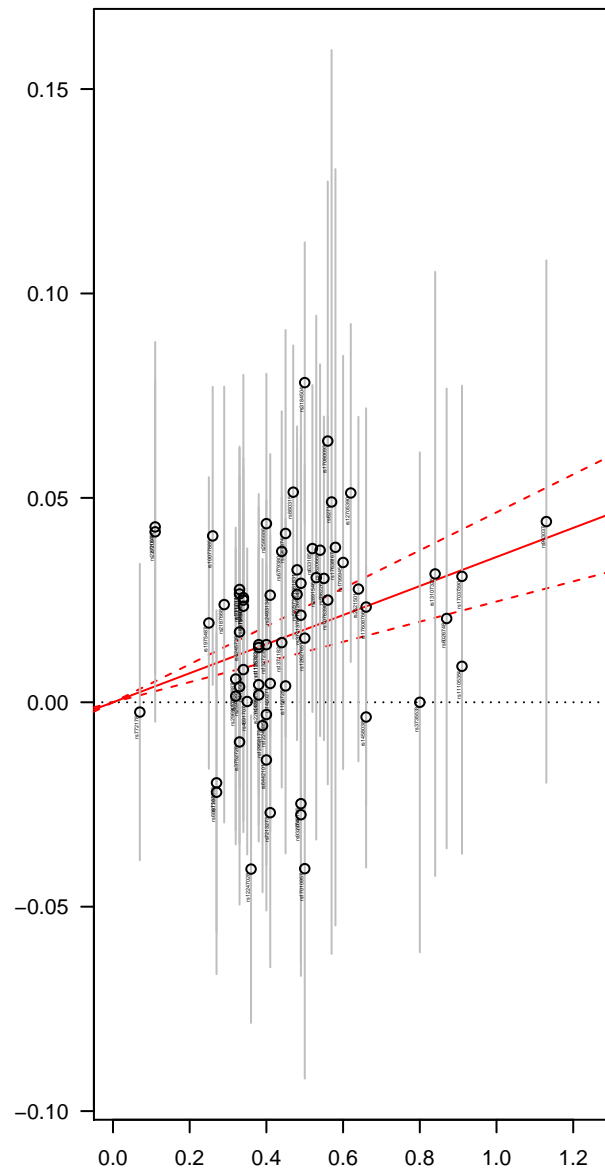

stroke, ischemic subtype [M], DBP; all SNPs

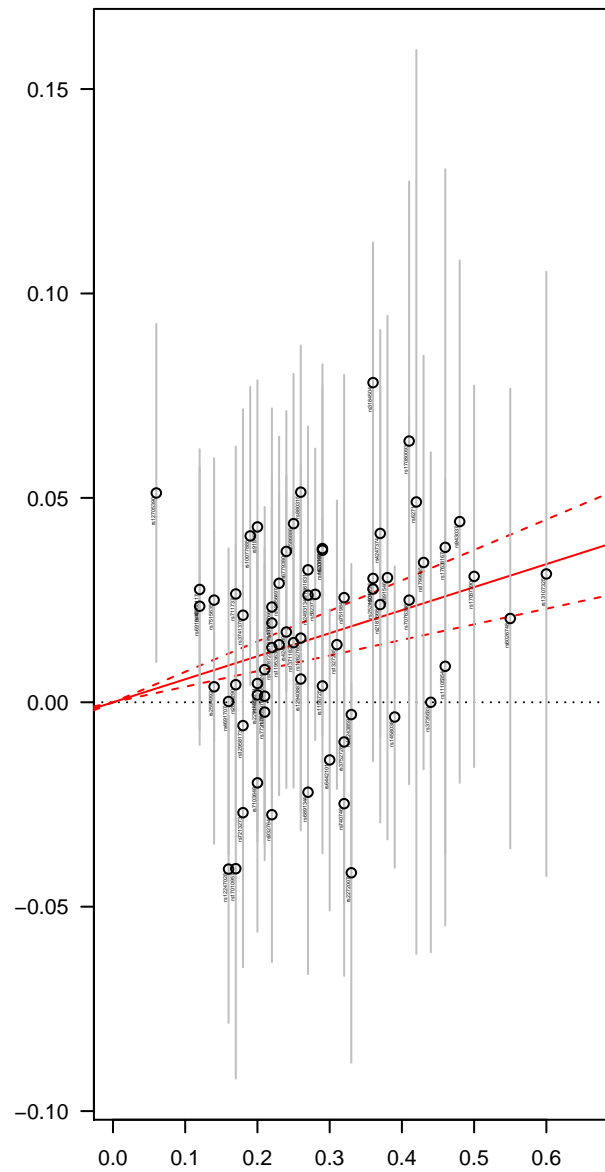

stroke, ischemic subtype [M], DBP; 0 pruned

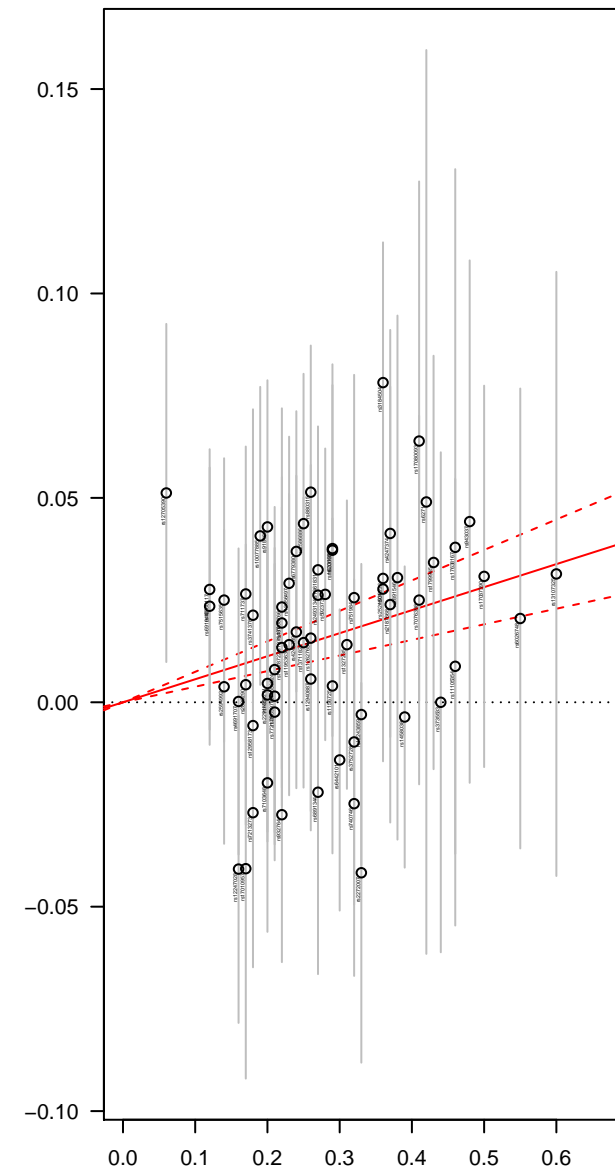

cIMT, SBP; all SNPs

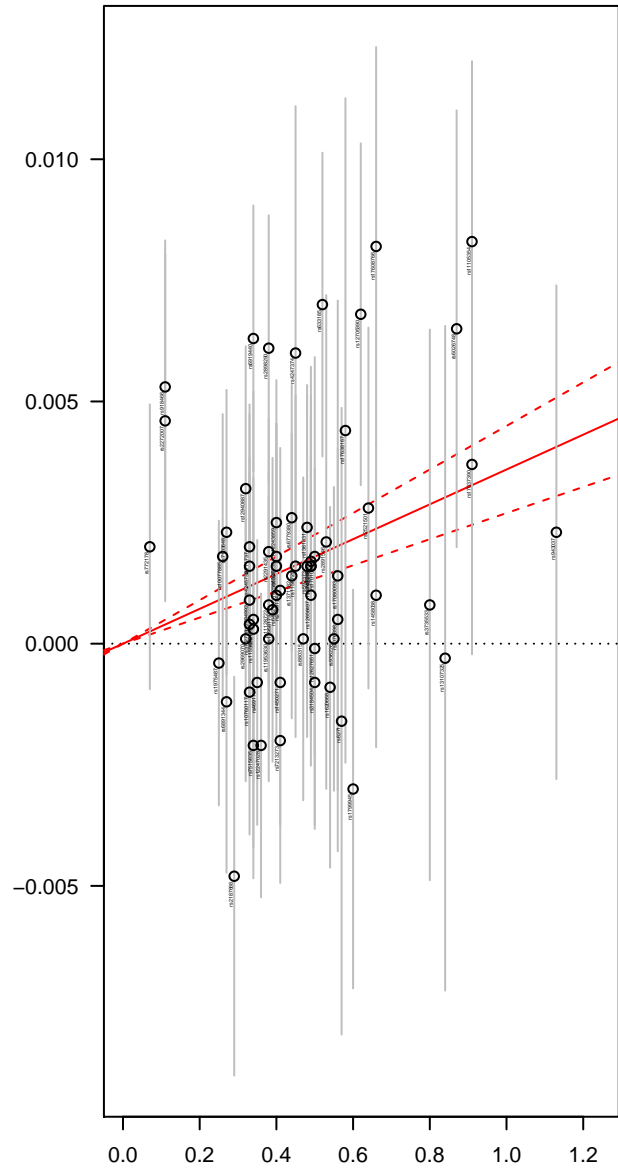

cIMT, SBP; 4 pruned

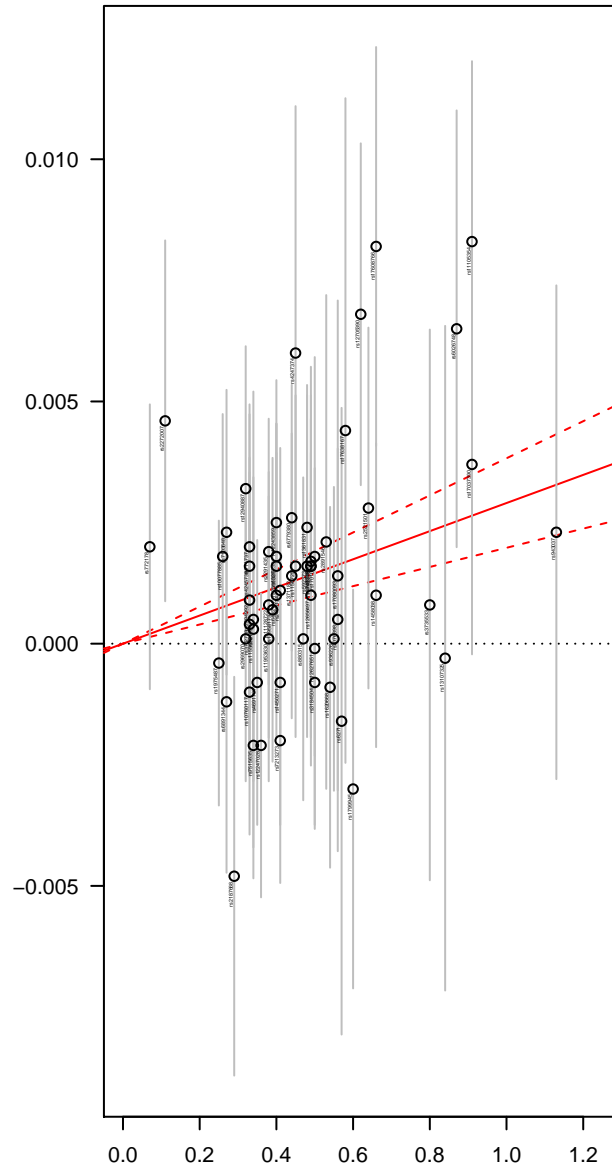

cIMT, DBP; all SNPs

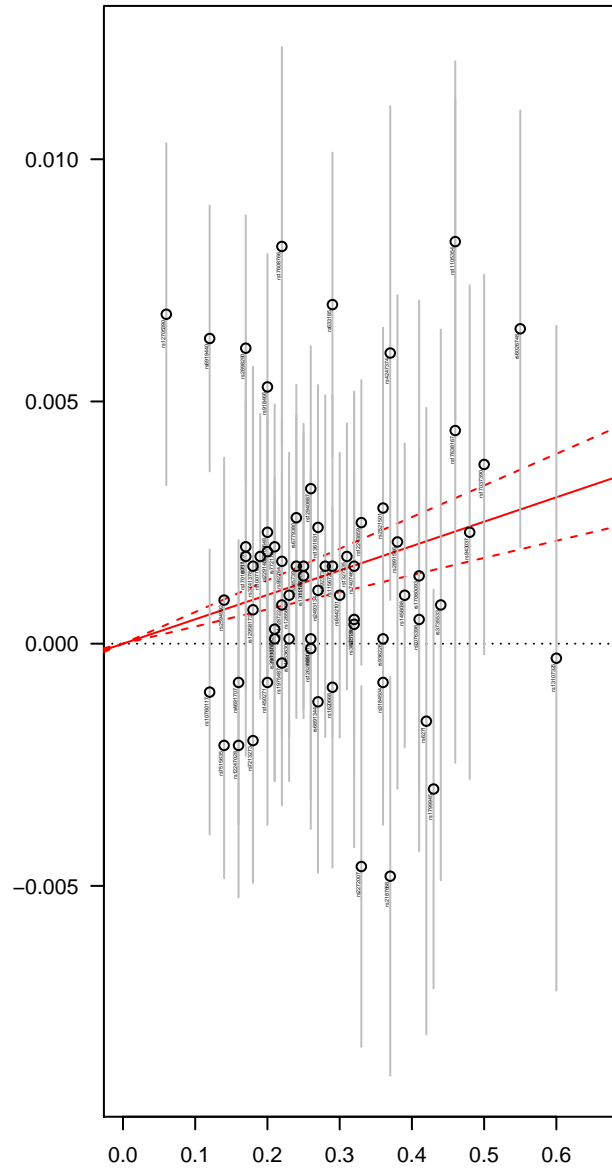

cIMT, DBP; 5 pruned

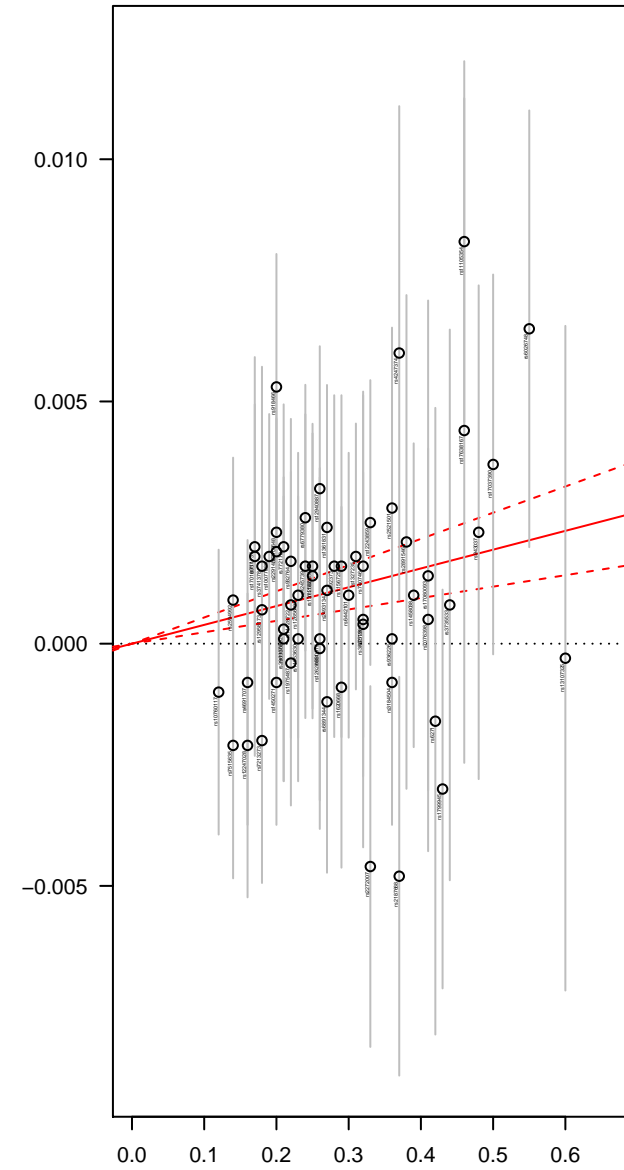

mild retinopathy [EU], SBP; all SNPs

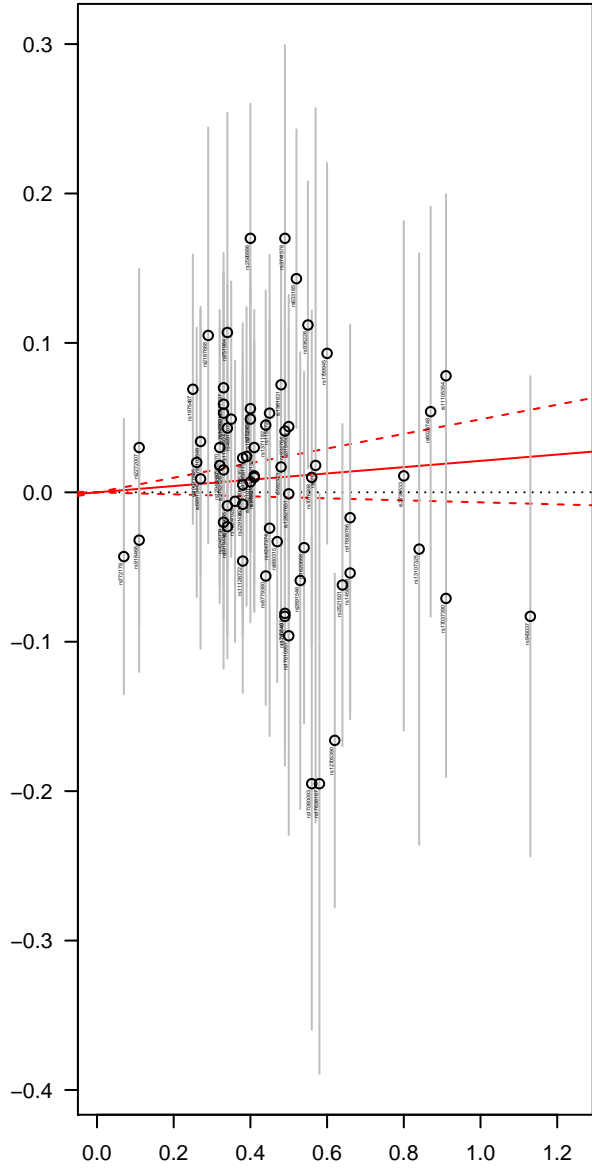

mild retinopathy [EU], SBP; 0 pruned

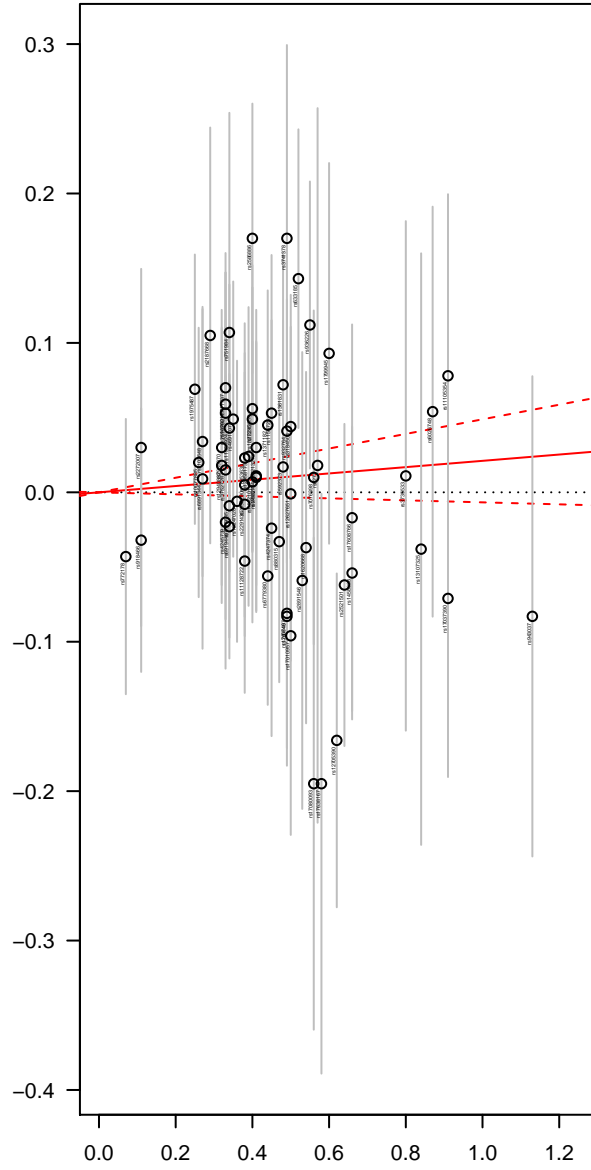

mild retinopathy [EU], DBP; all SNPs

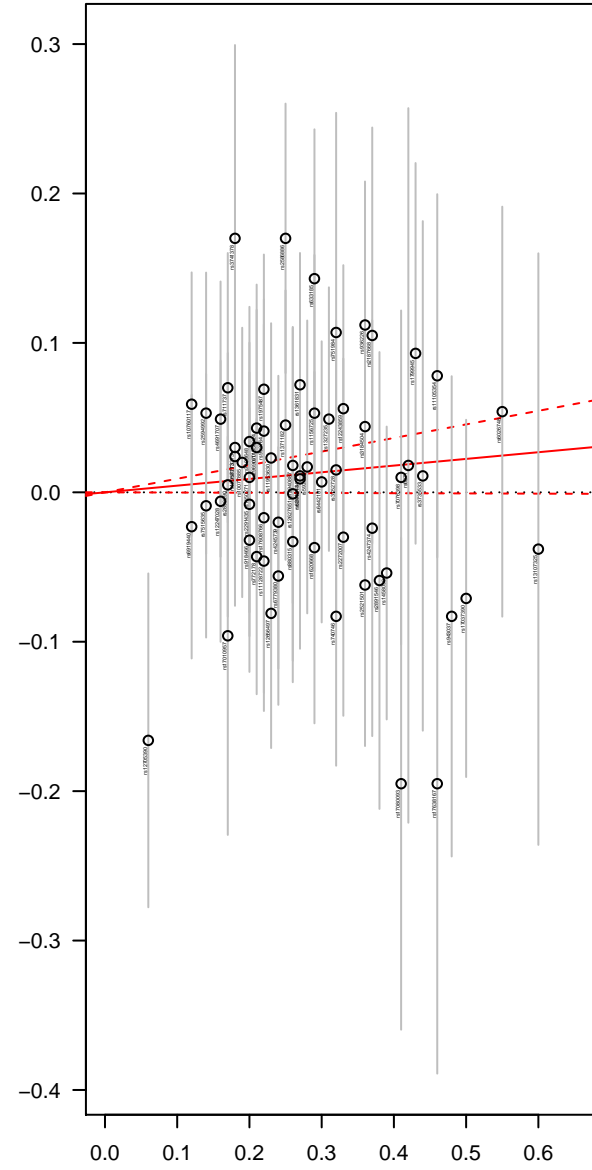

mild retinopathy [EU], DBP; 0 pruned

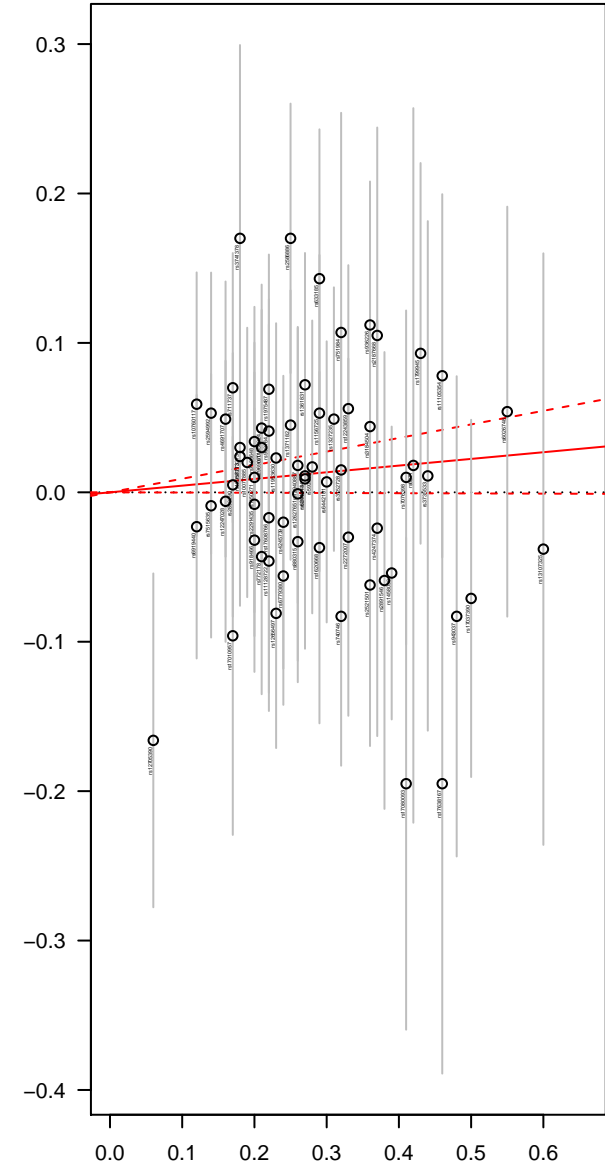

central retinal artery caliber [EU], SBP; all SNPs

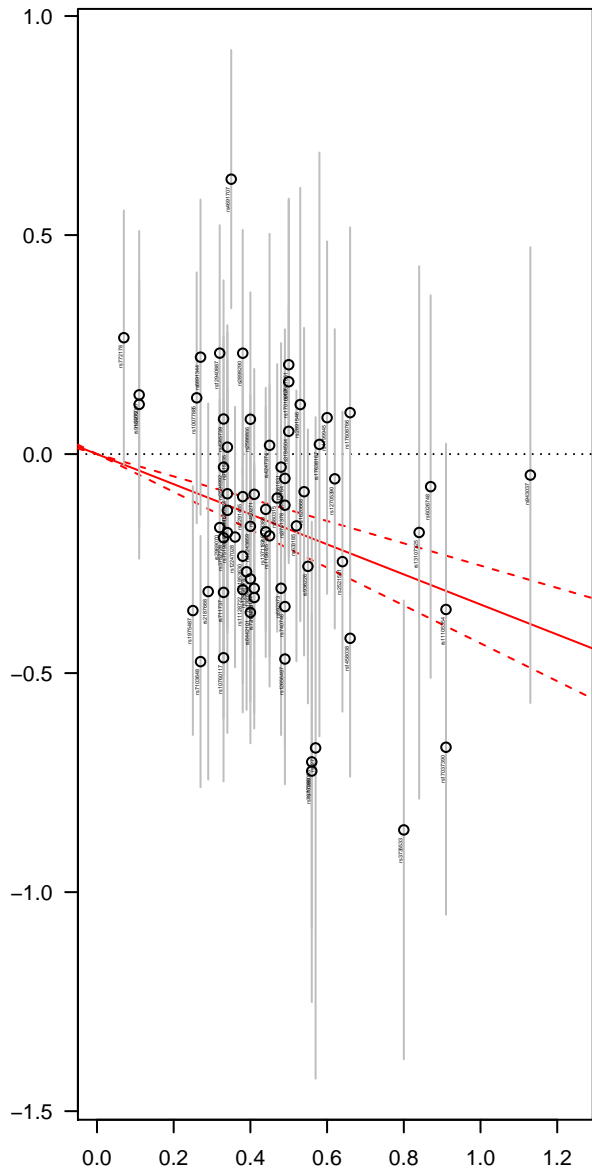

central retinal artery caliber [EU], SBP; 2 pruned

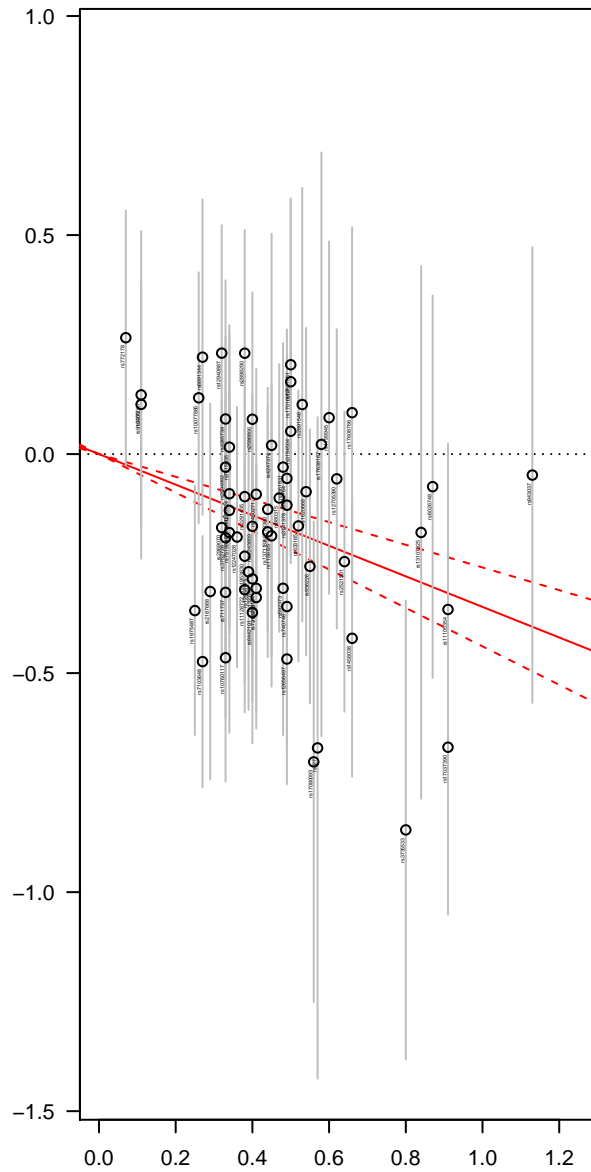

central retinal artery caliber [EU], DBP; all SNPs

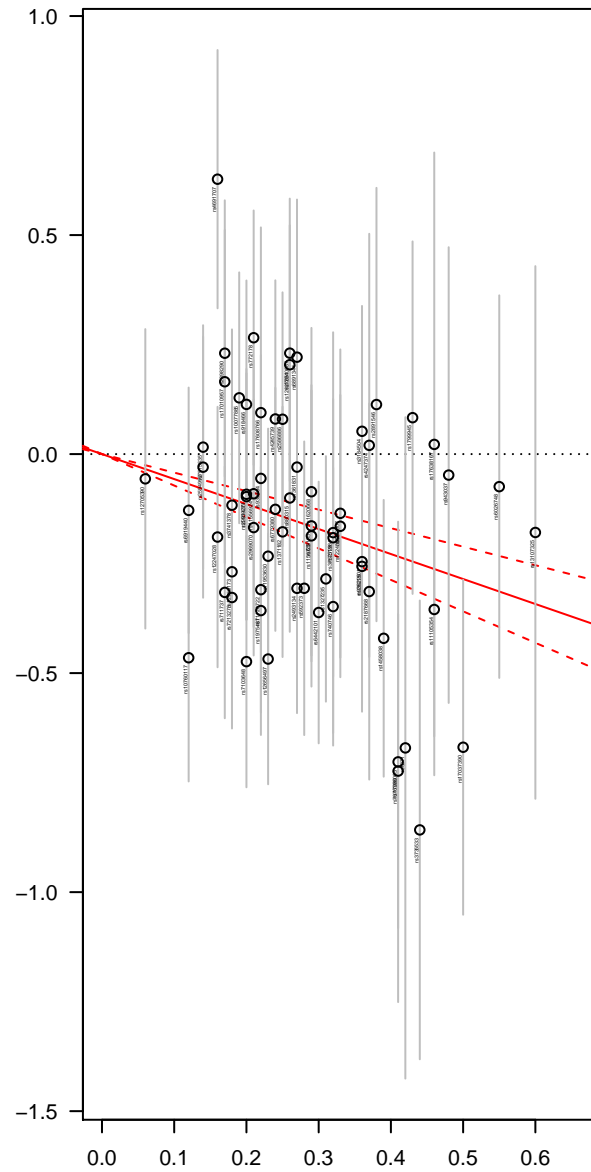

central retinal artery caliber [EU], DBP; 3 pruned

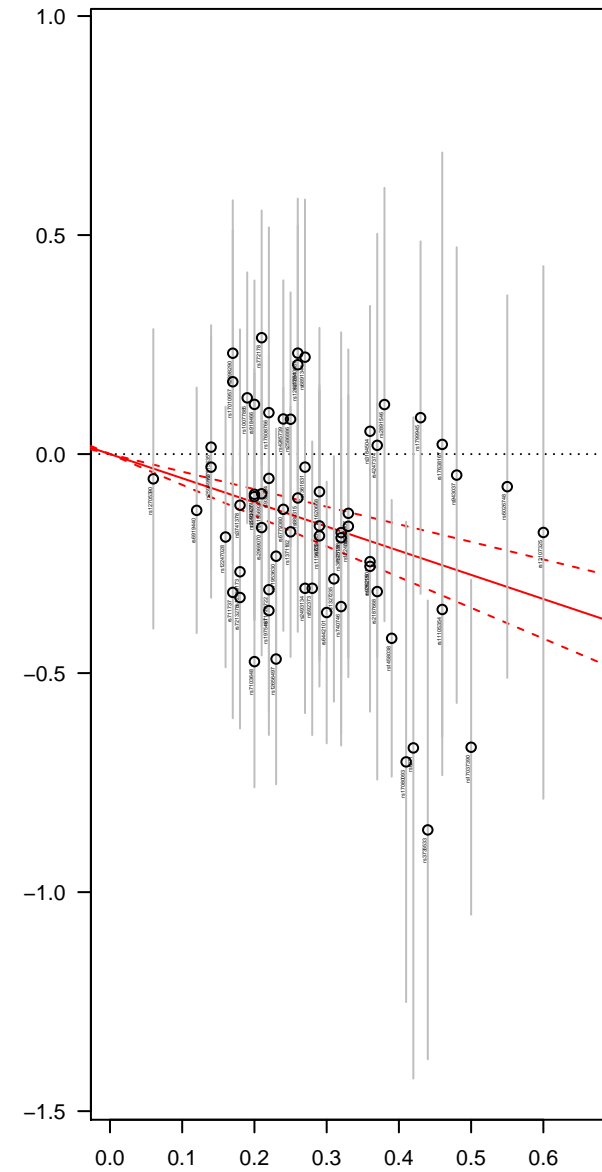

mild retinopathy [AS], SBP; all SNPs

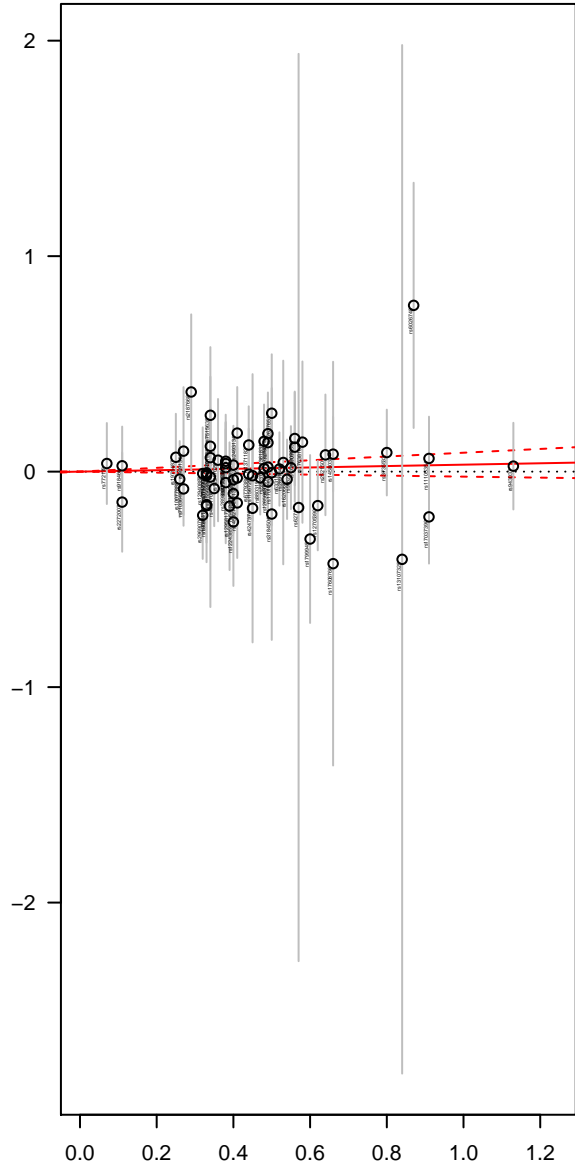

mild retinopathy [AS], SBP; 0 pruned

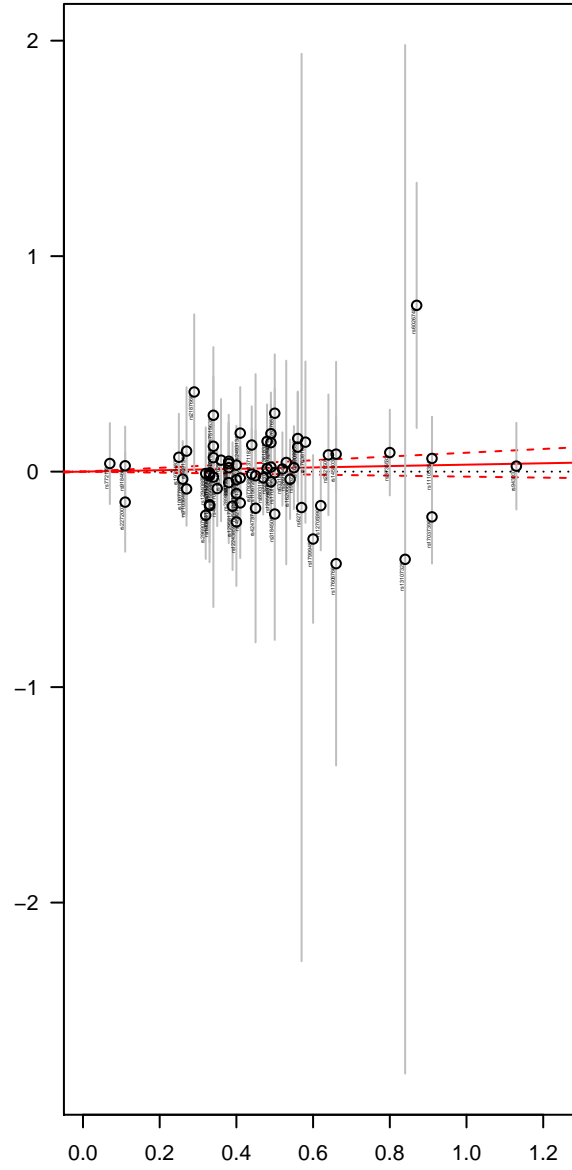

mild retinopathy [AS], DBP; all SNPs

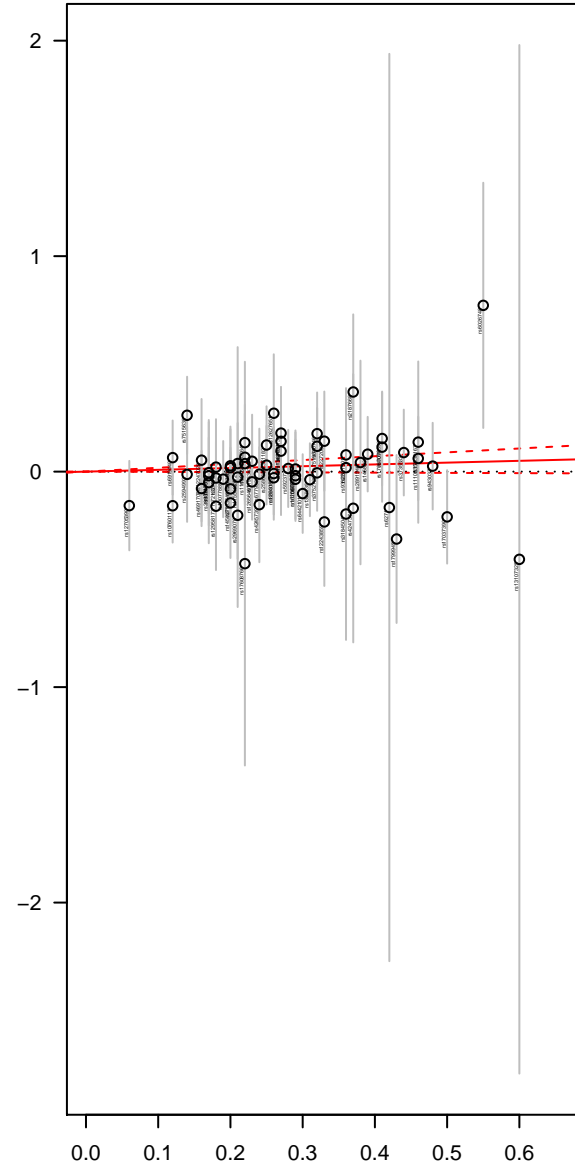

mild retinopathy [AS], DBP; 0 pruned

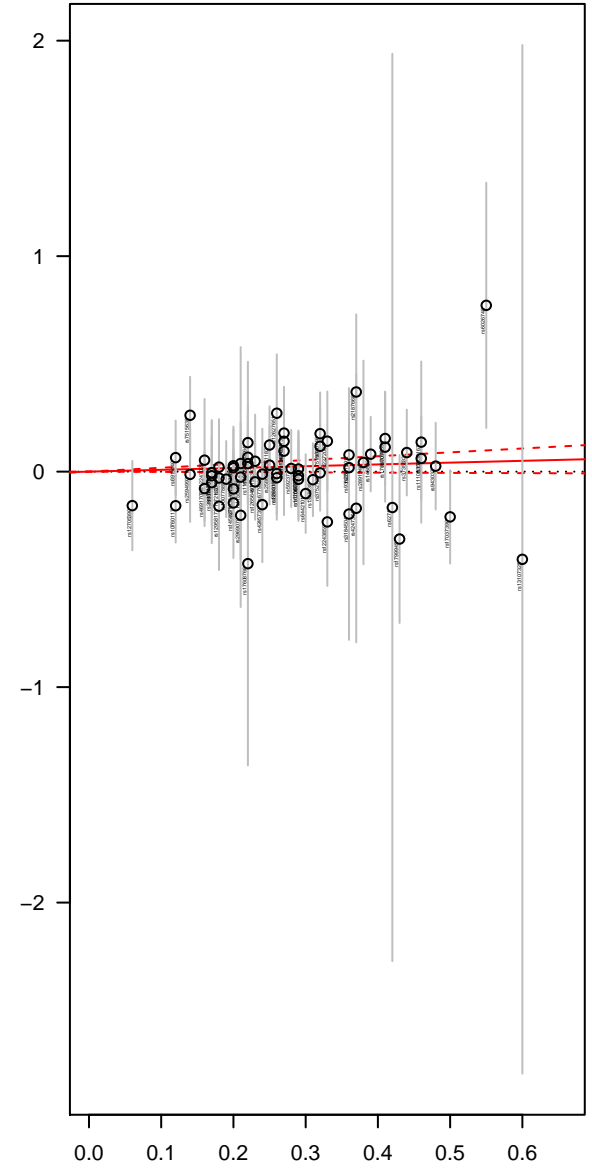

central retinal artery caliber [AS], SBP; all SNPs

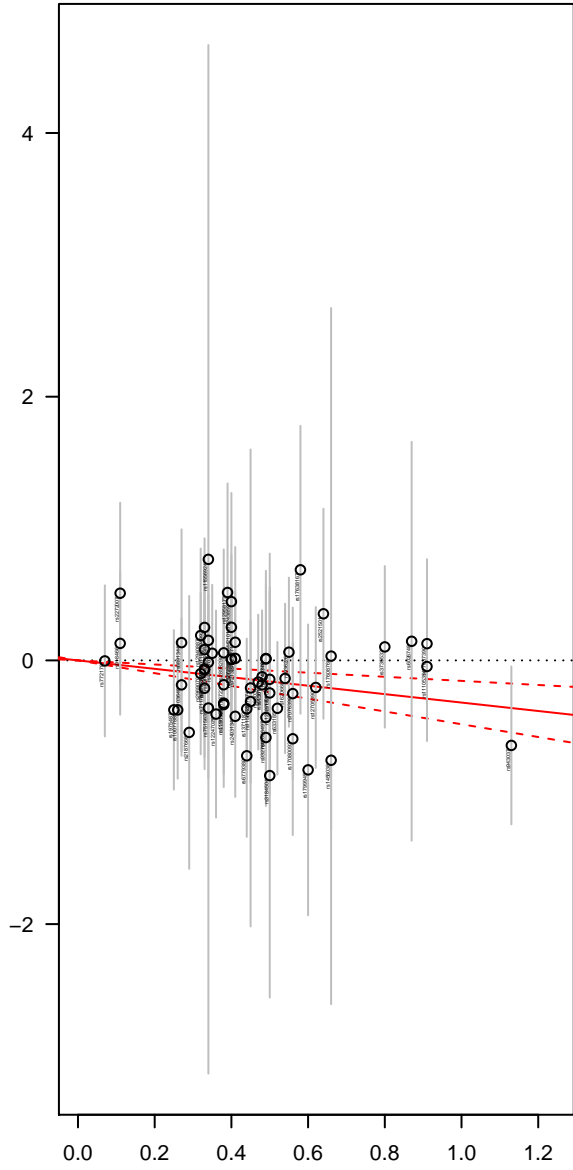

central retinal artery caliber [AS], SBP; 0 pruned

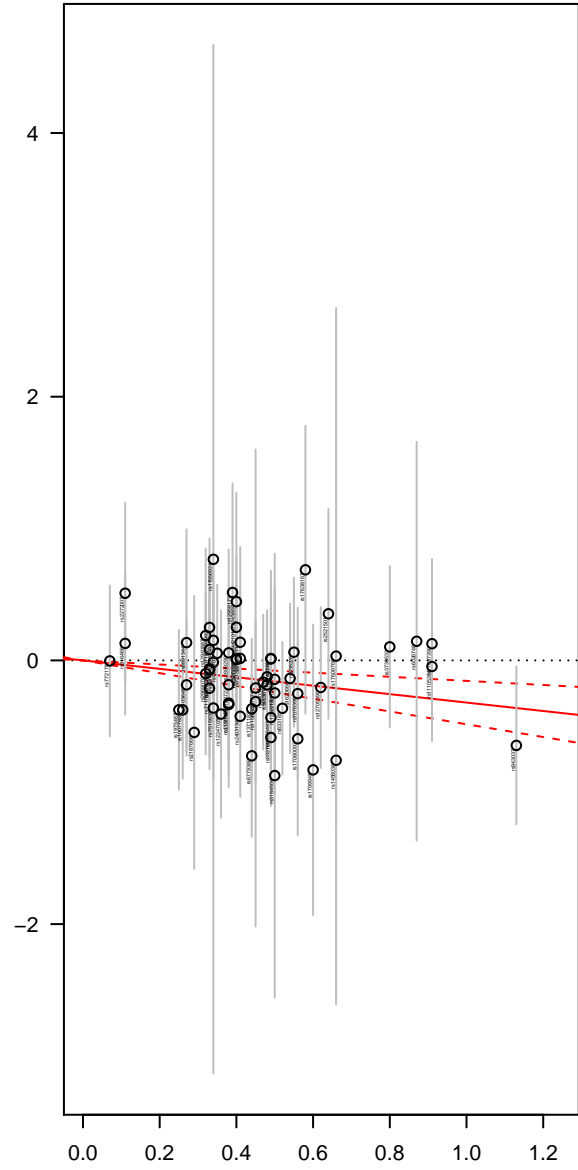

central retinal artery caliber [AS], DBP; all SNPs

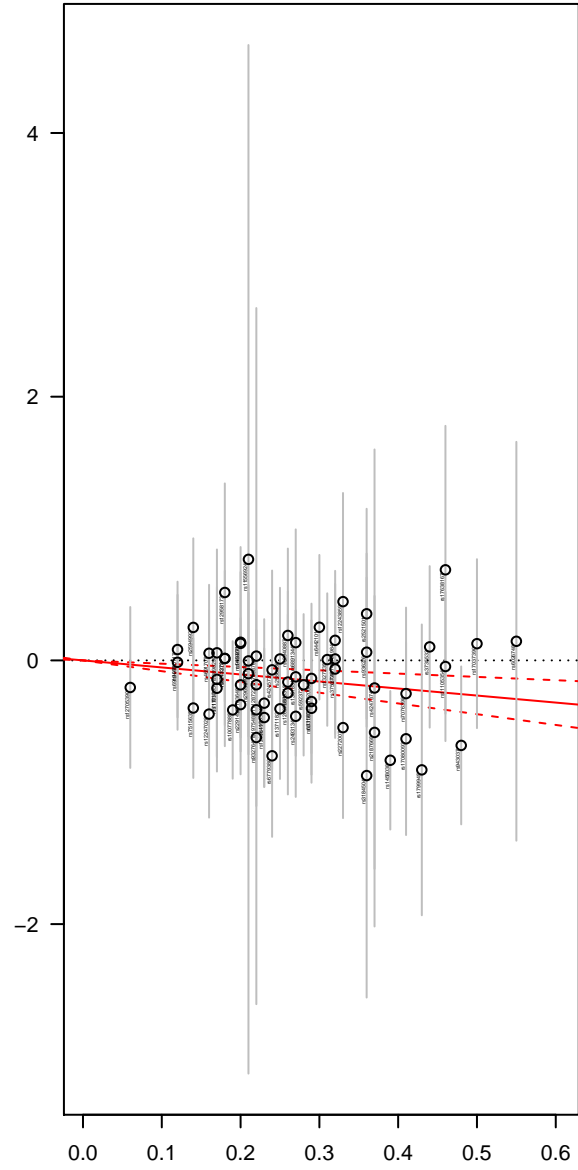

central retinal artery caliber [AS], DBP; 0 pruned

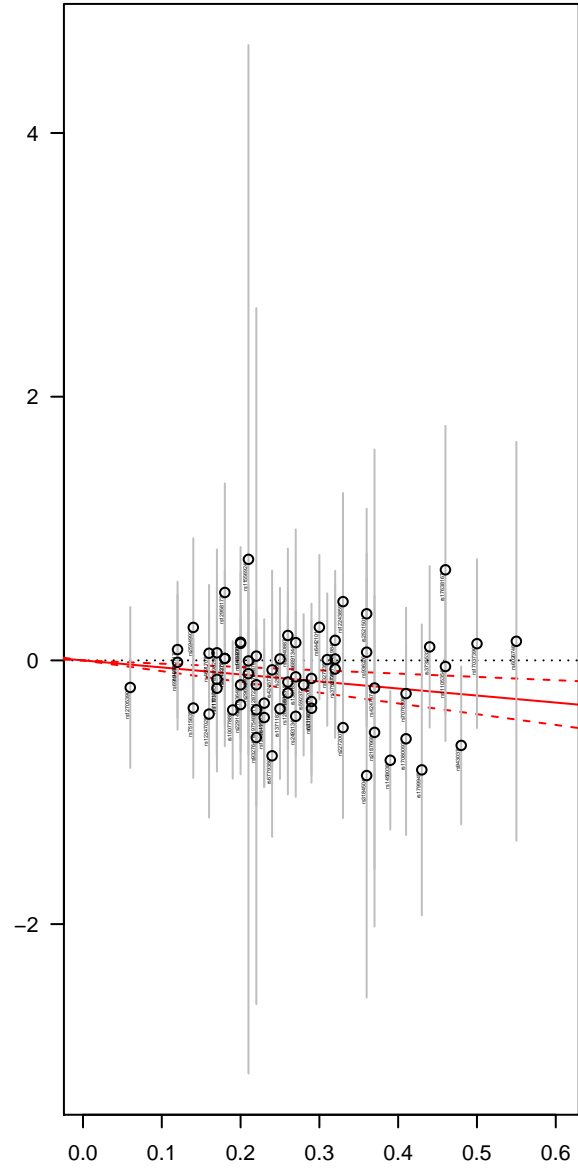

LDL, SBP; all SNPs

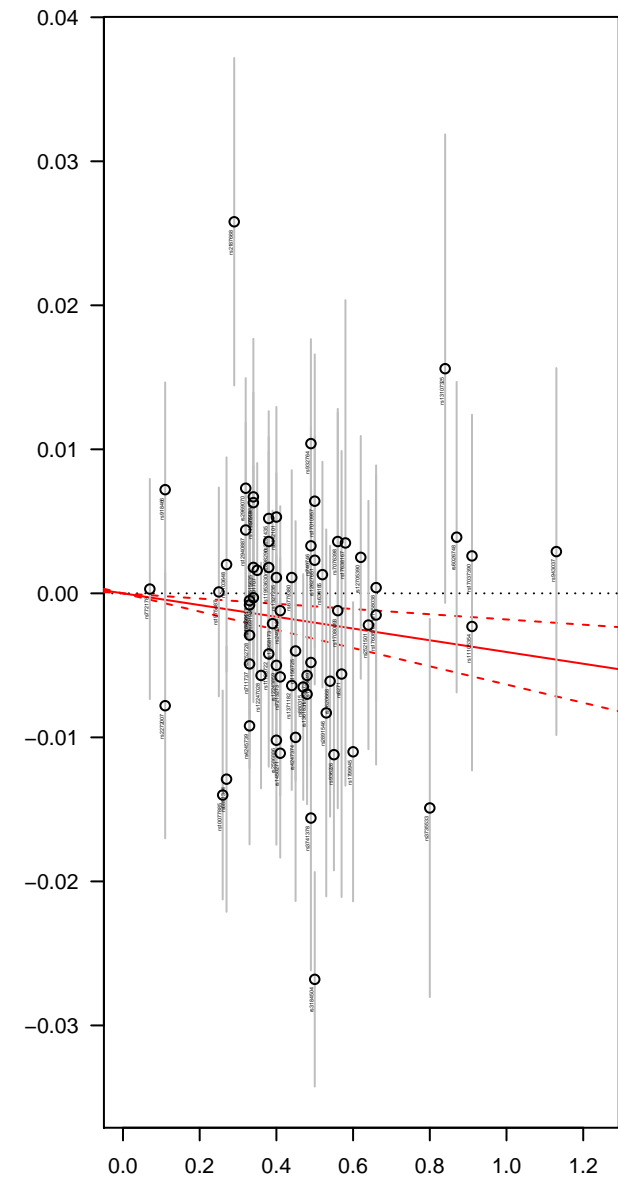

LDL, SBP; 6 pruned

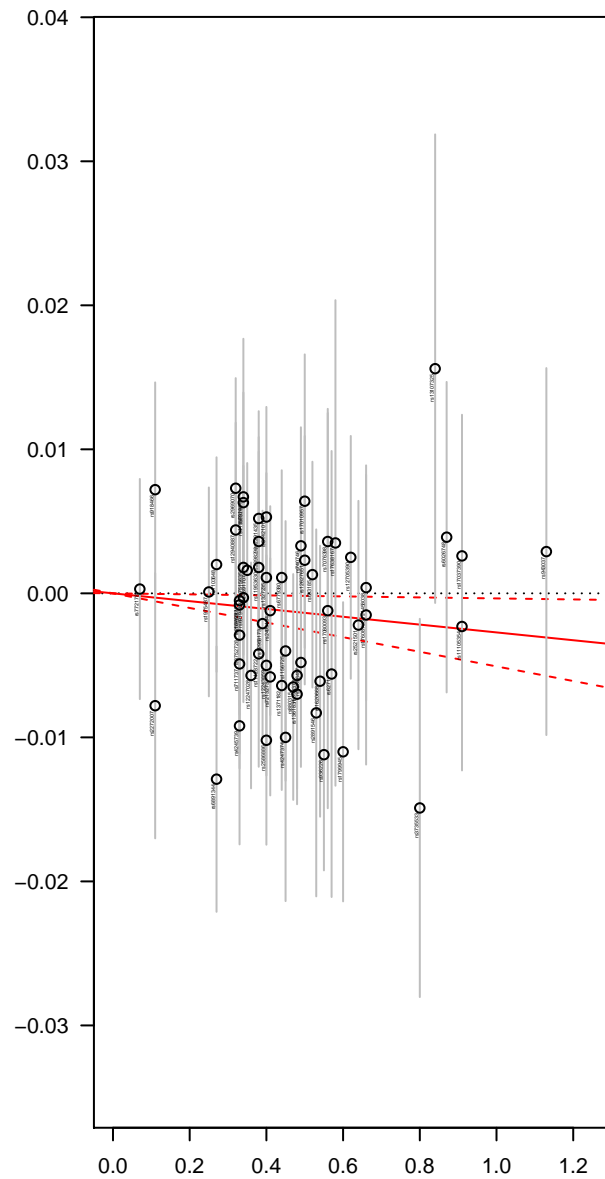

LDL, DBP; all SNPs

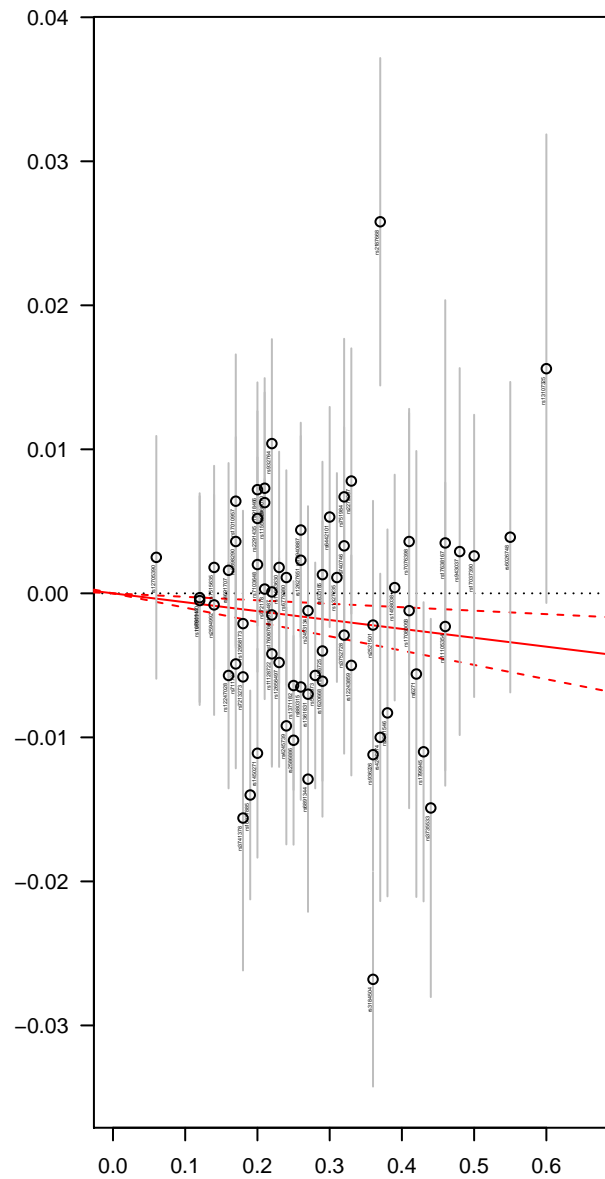

LDL, DBP; 6 pruned

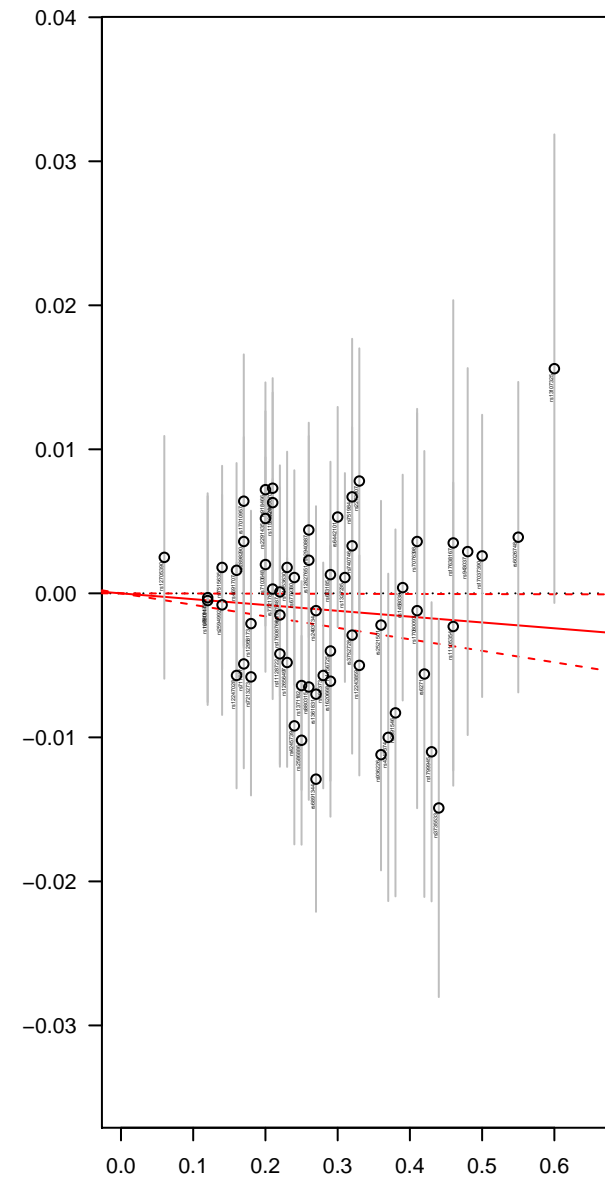

HDL, SBP; all SNPs

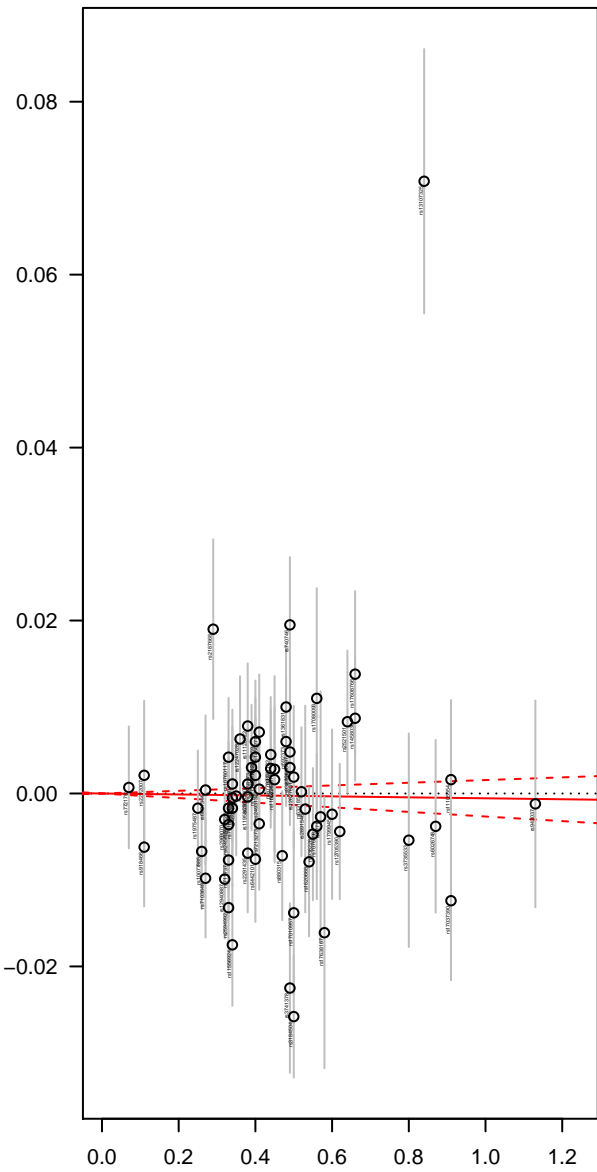

HDL, SBP; 12 pruned

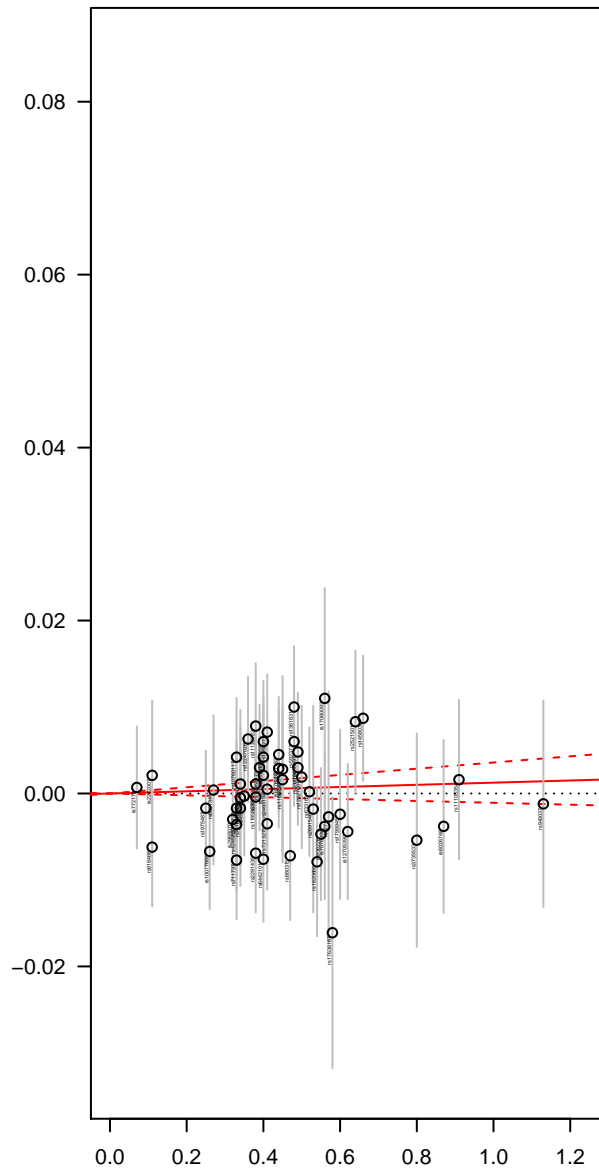

HDL, DBP; all SNPs

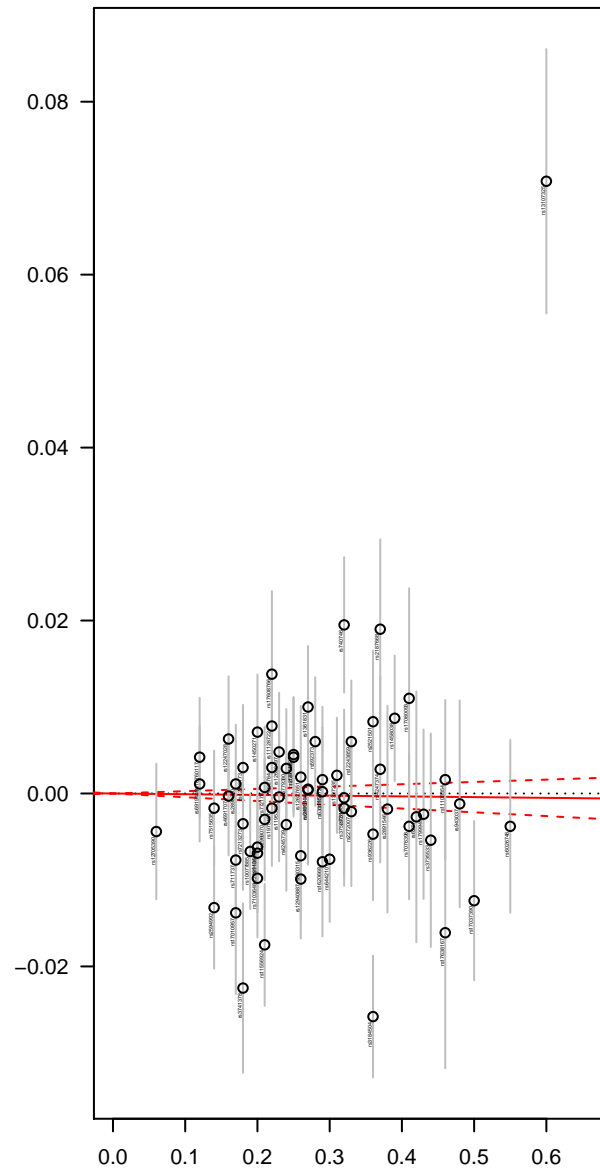

HDL, DBP; 12 pruned

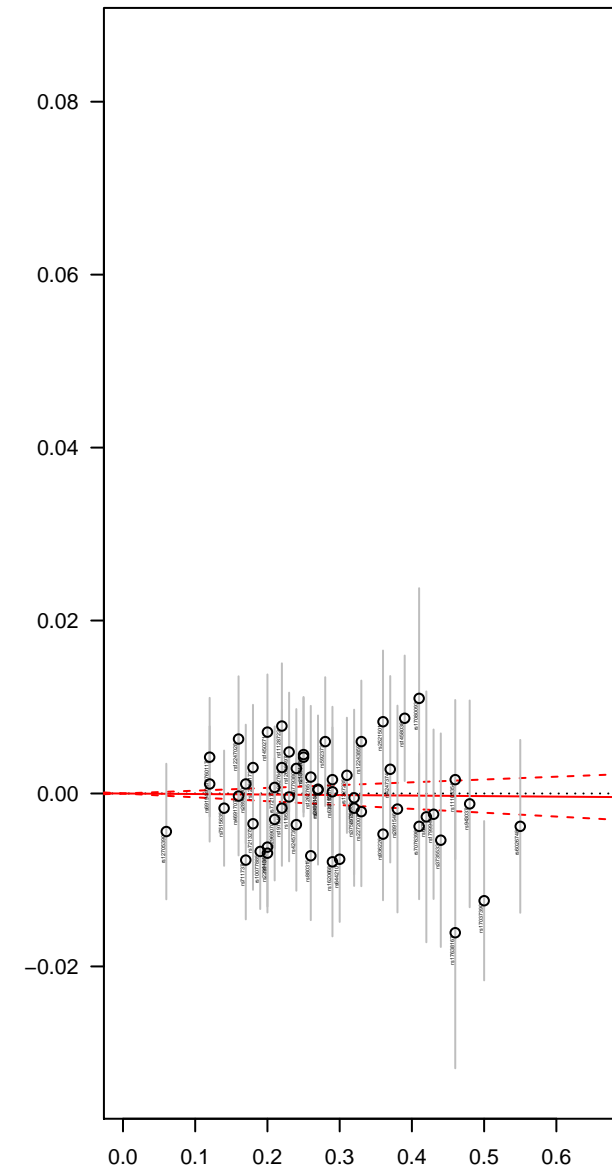



TG, SBP; all SNPs

TG, SBP; 6 pruned

TG, DBP; all SNPs

TG, DBP; 6 pruned

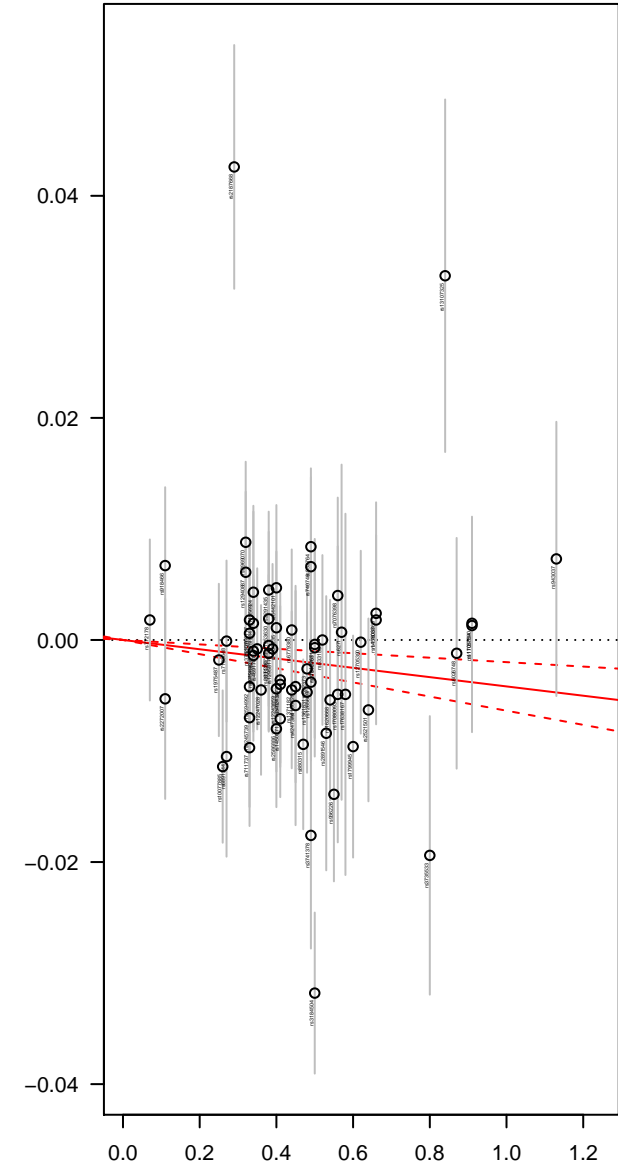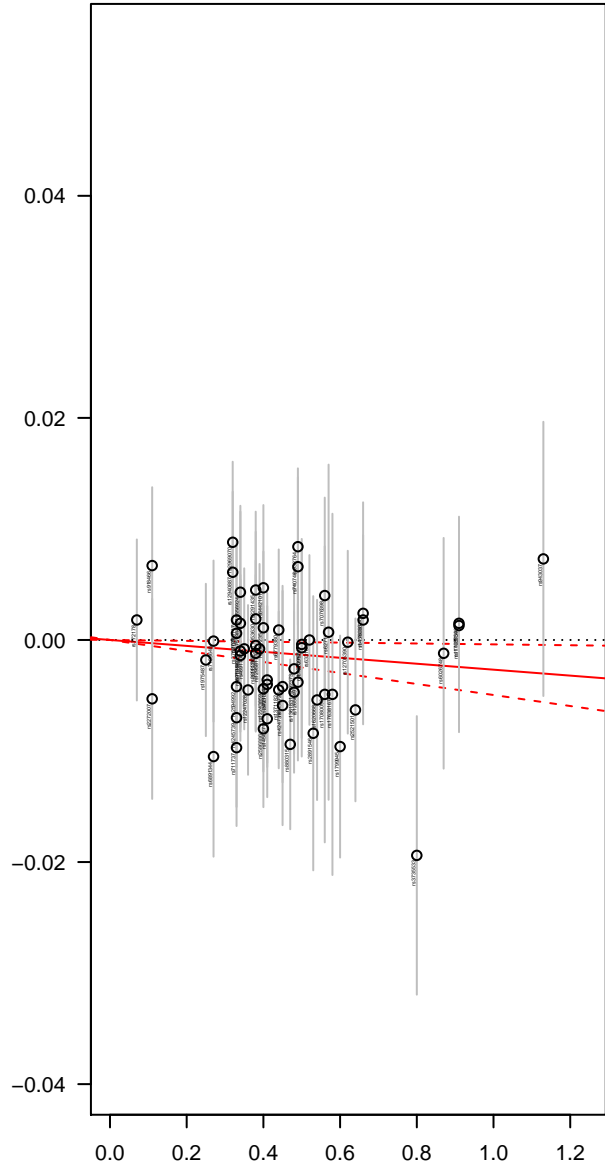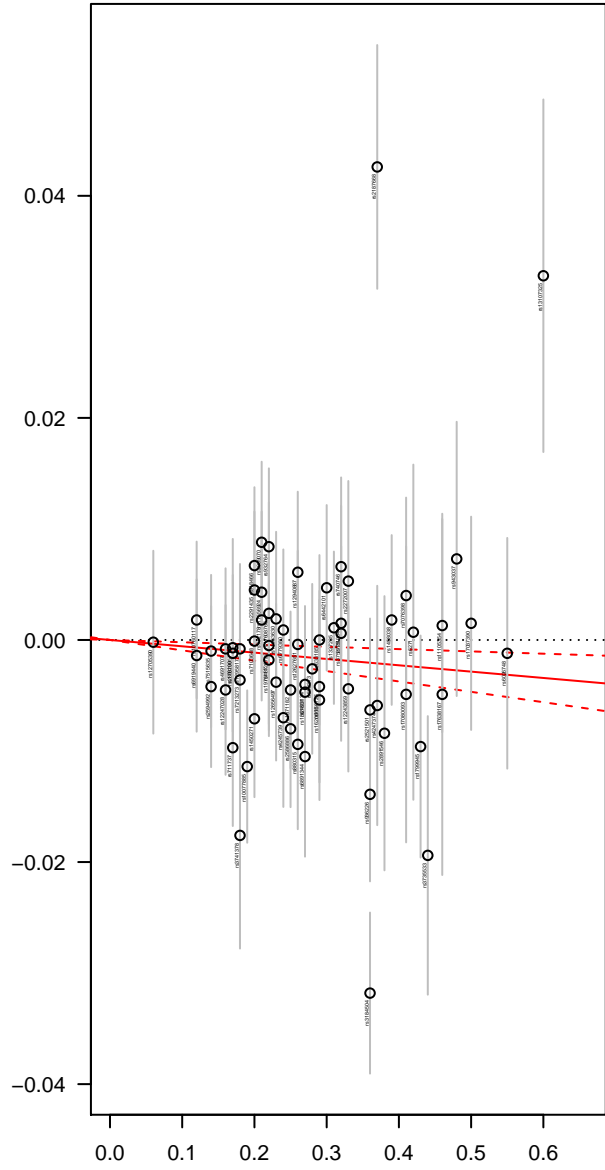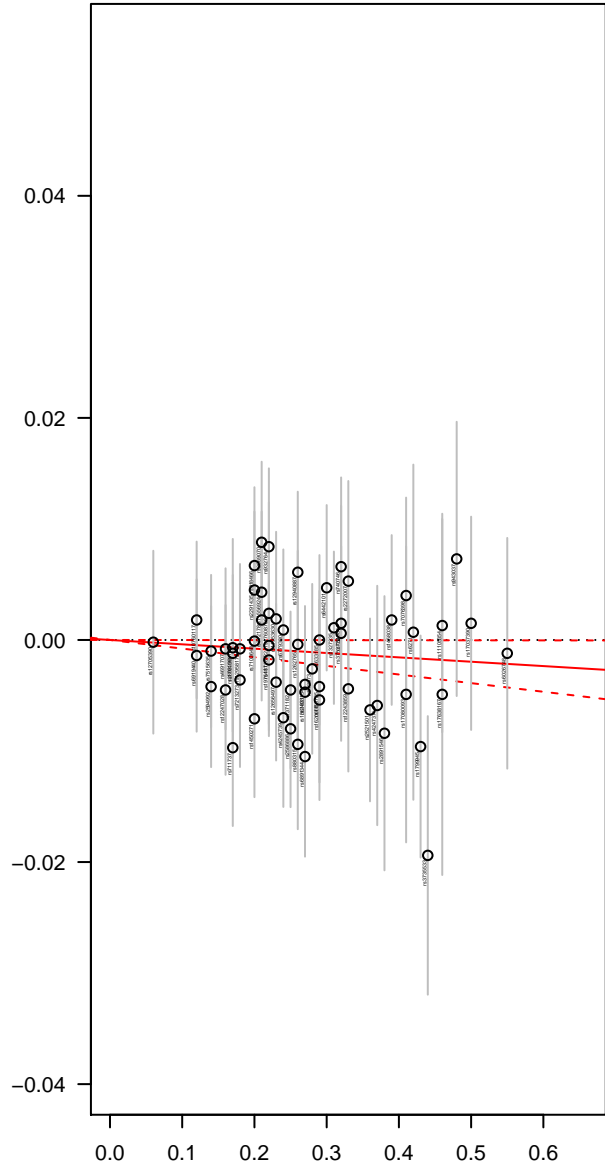

BMI, SBP; all SNPs

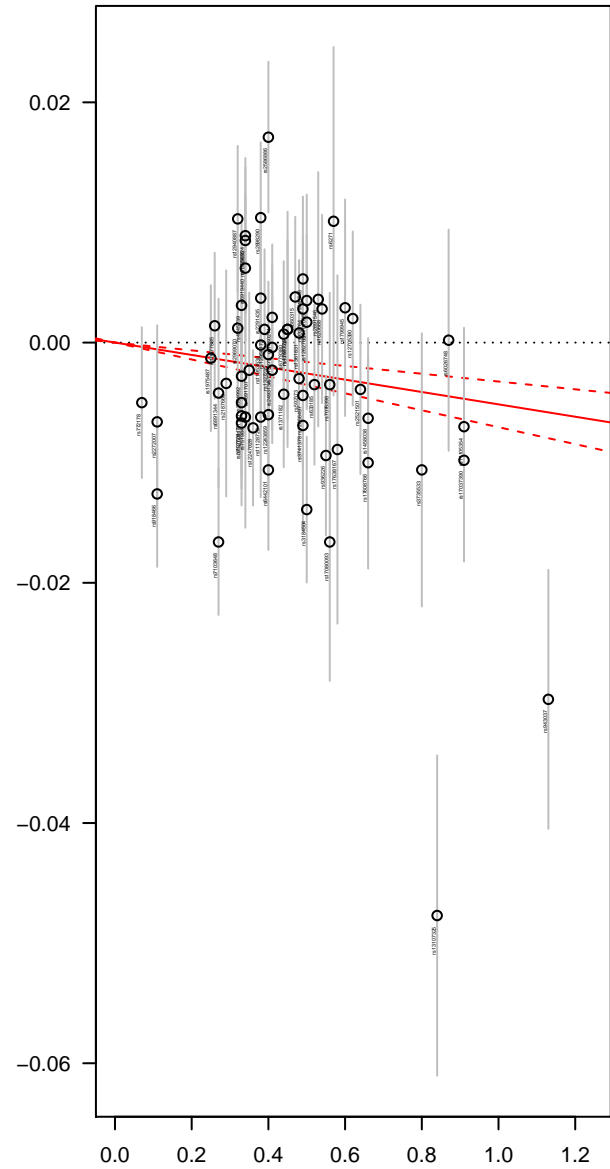

BMI, SBP; 10 pruned

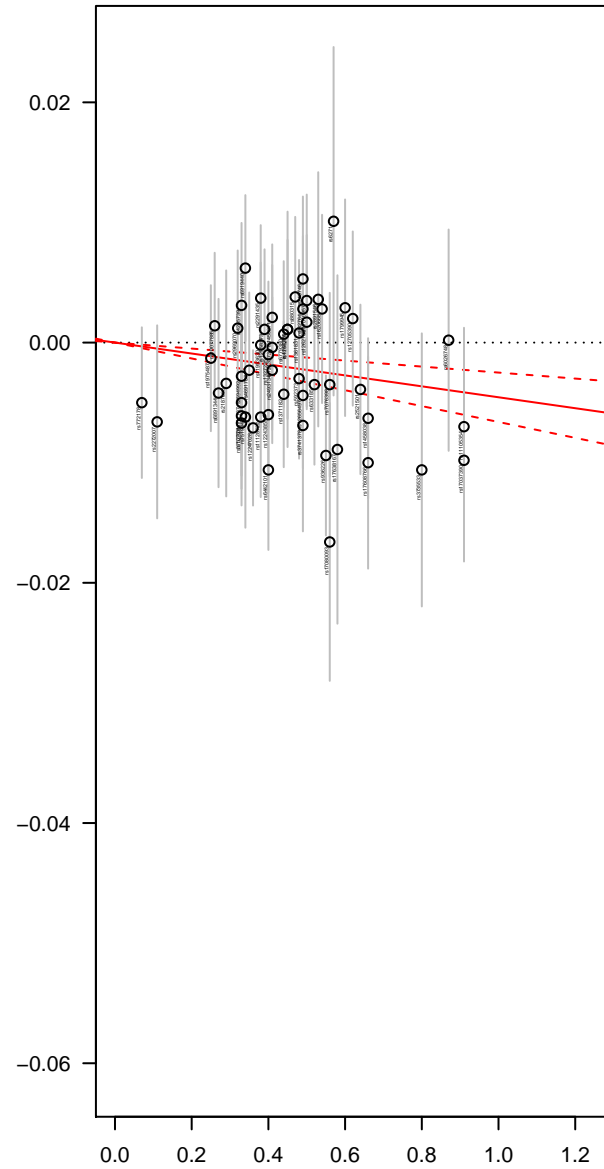

BMI, DBP; all SNPs

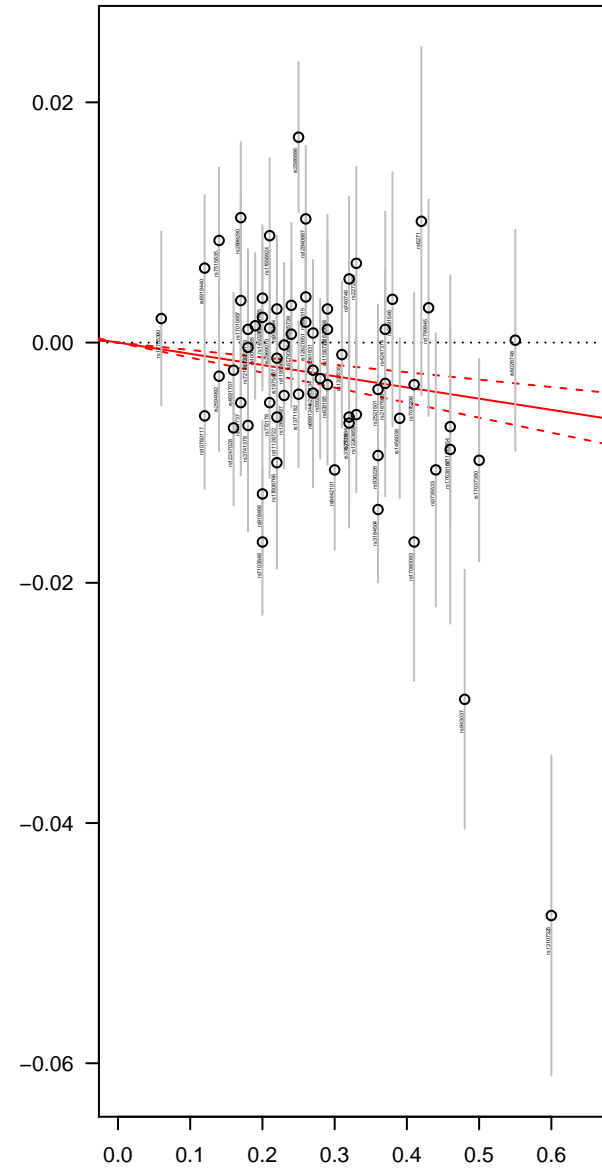

BMI, DBP; 10 pruned

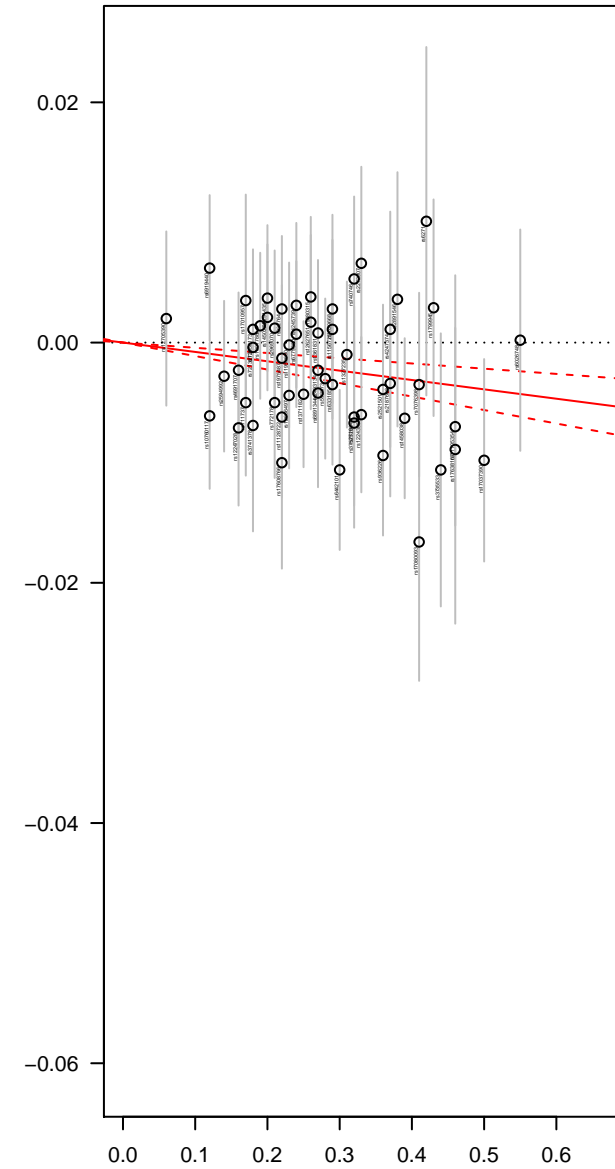

t2d, SBP; all SNPs

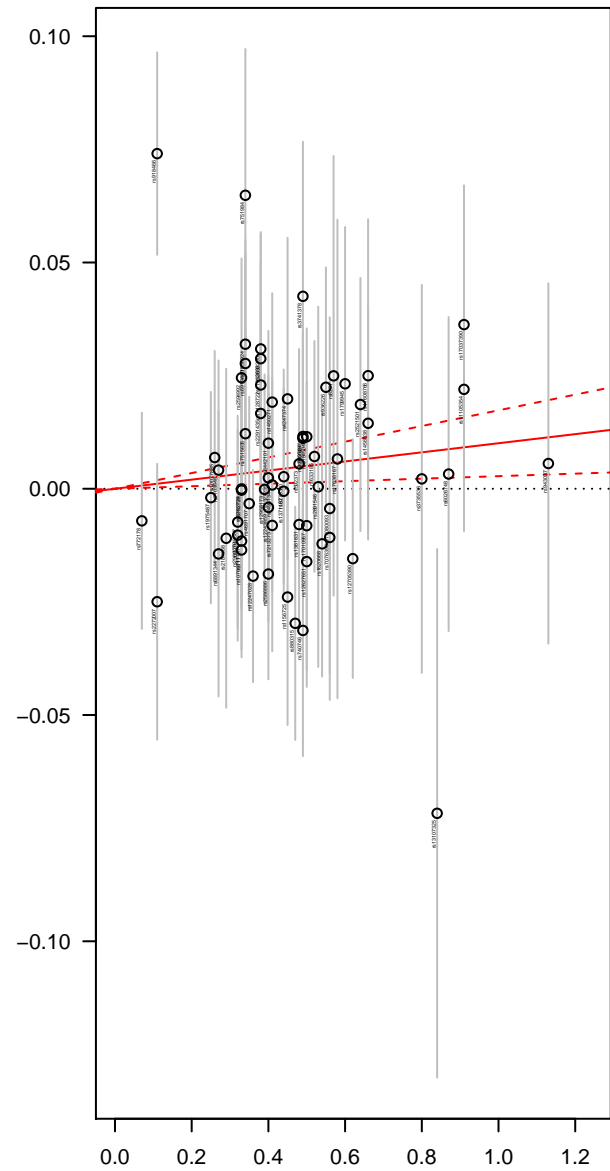

t2d, SBP; 2 pruned

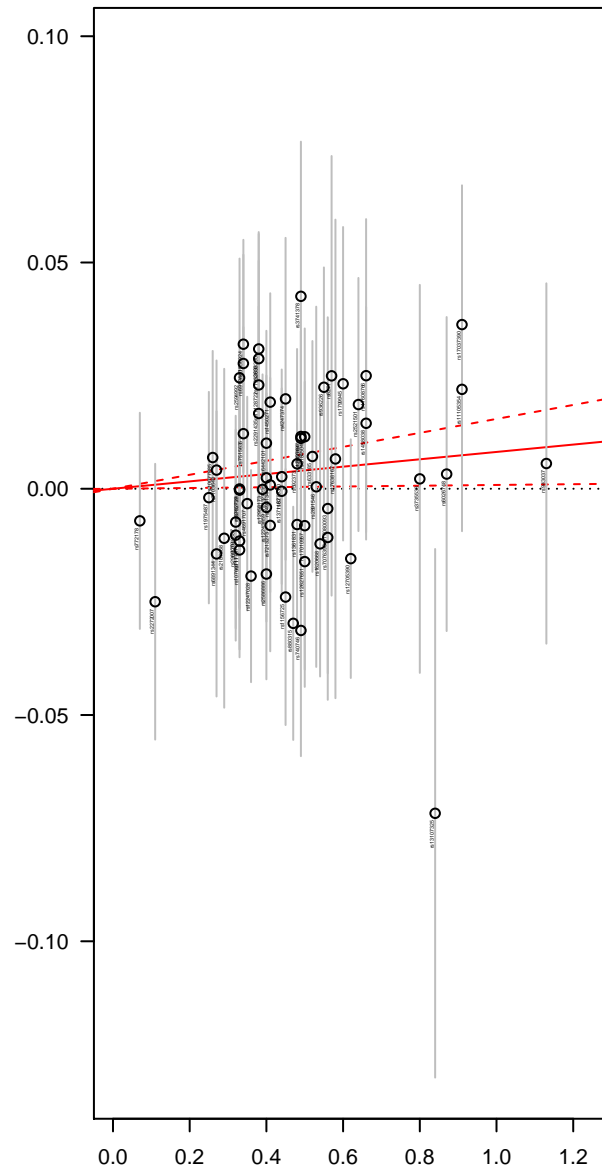

t2d, DBP; all SNPs

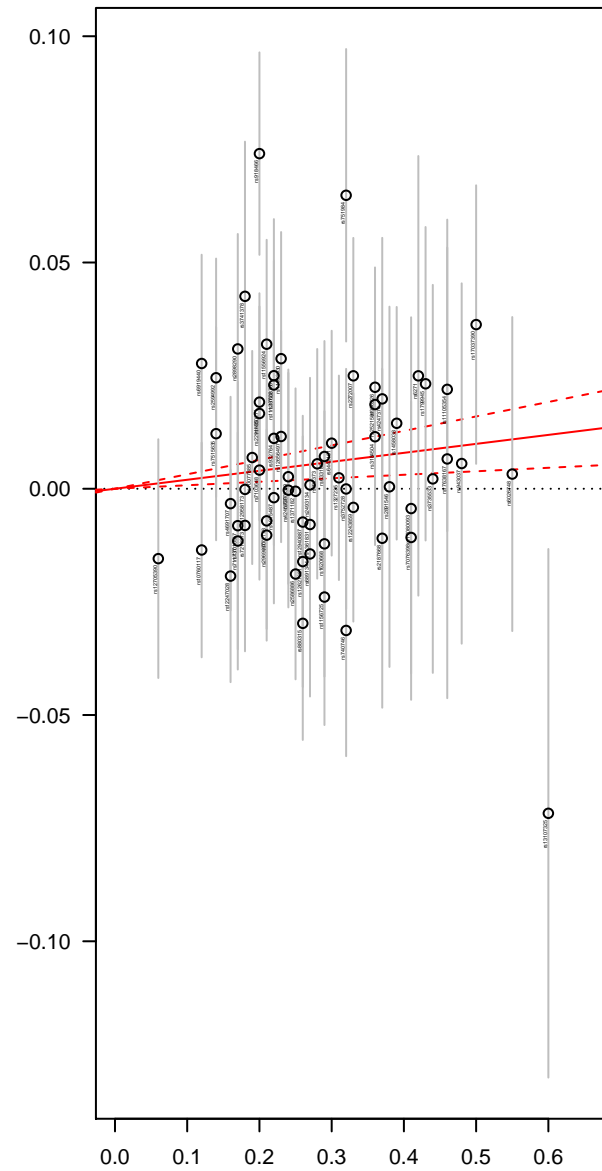

t2d, DBP; 2 pruned

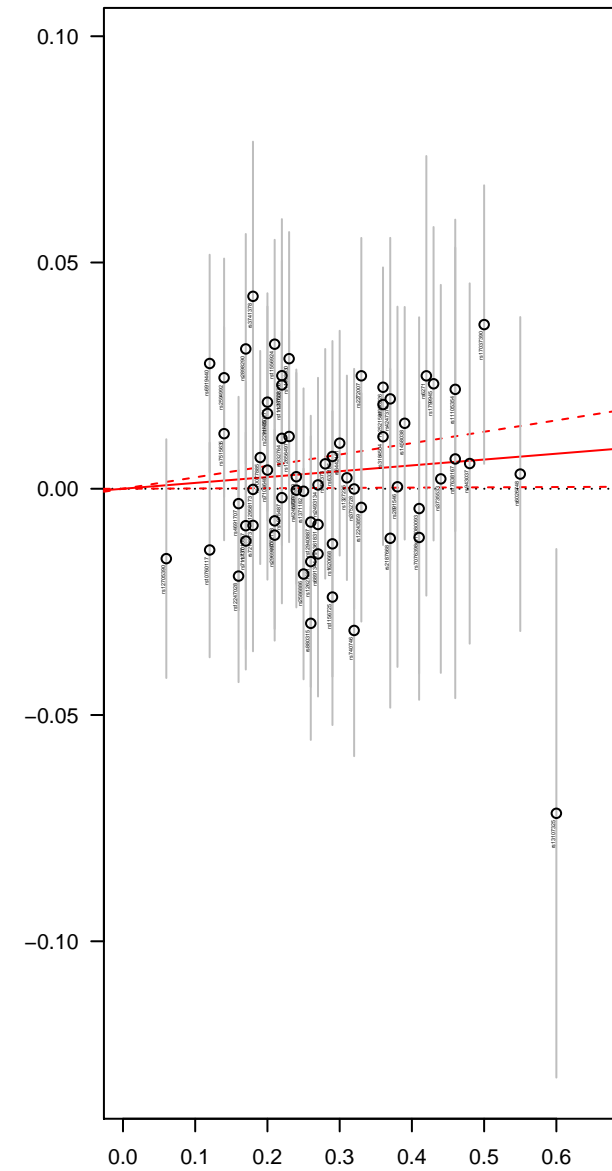

height, SBP; all SNPs

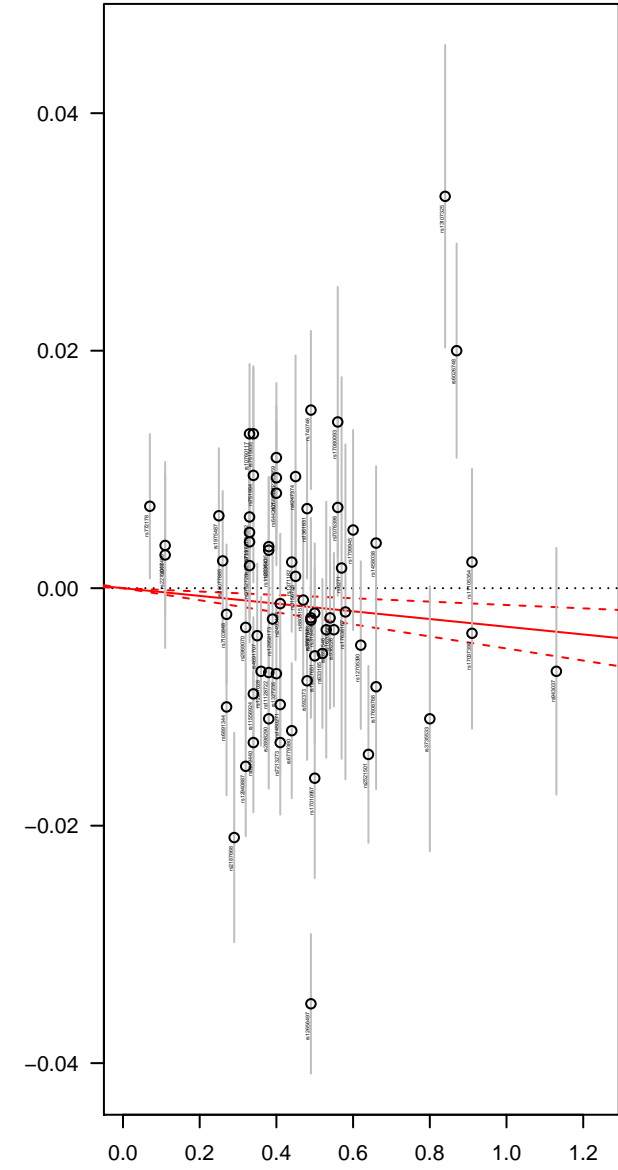

height, SBP; 24 pruned

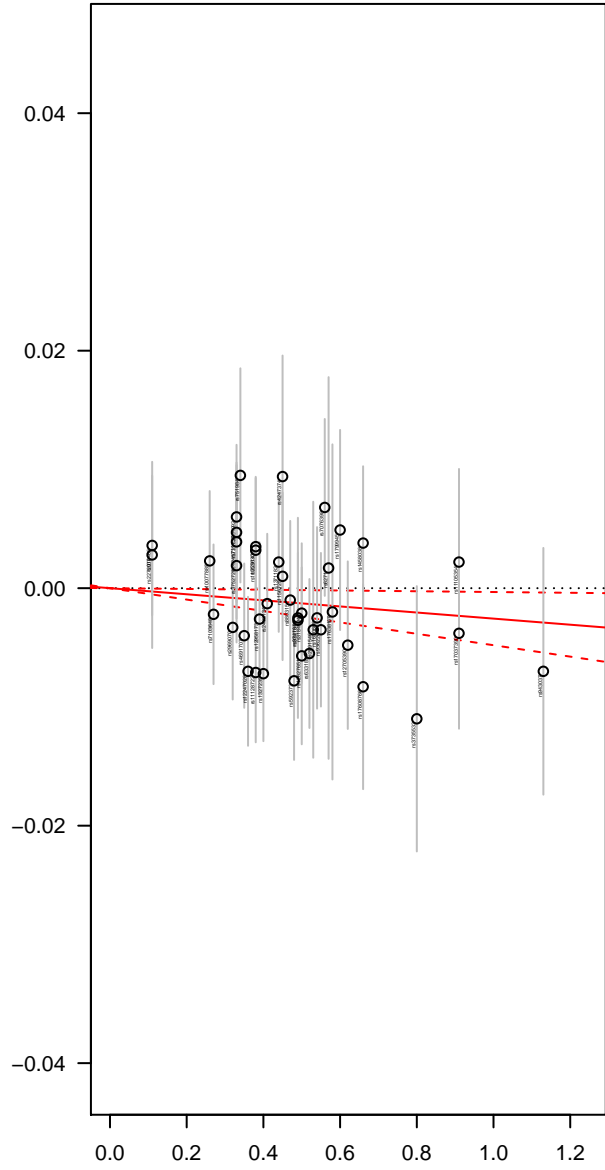

height, DBP; all SNPs

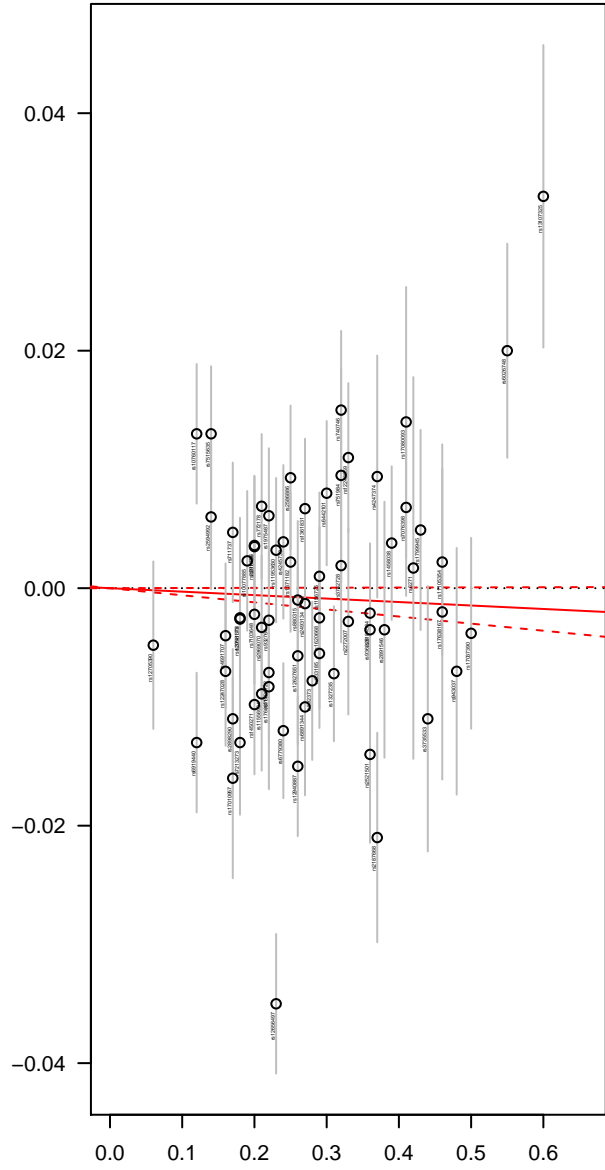

height, DBP; 25 pruned

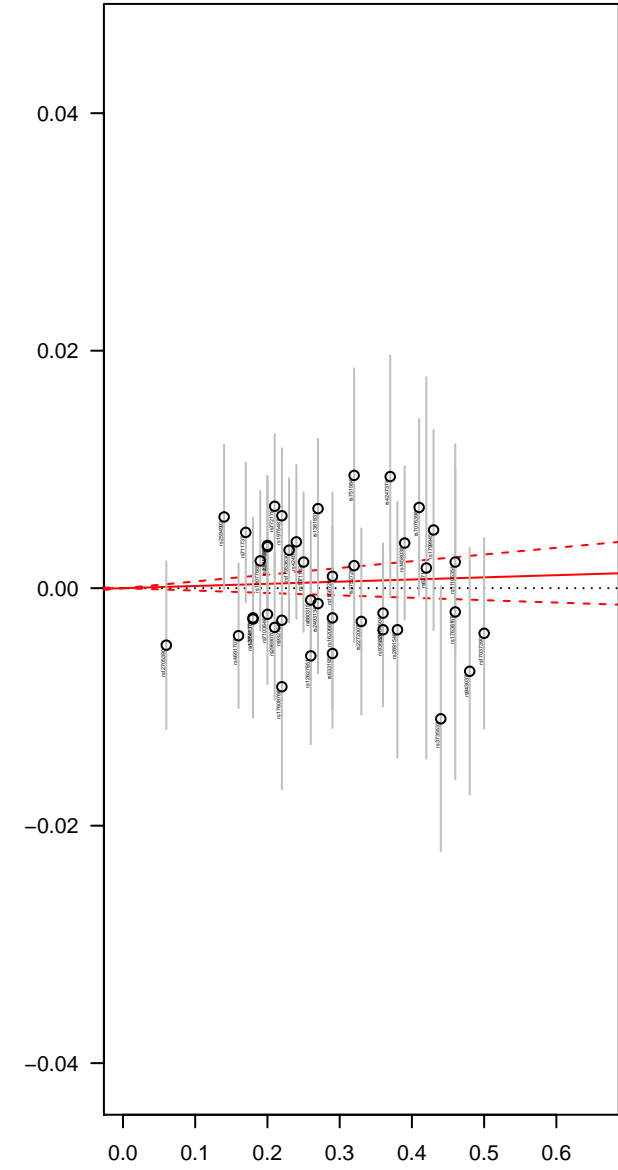

1   **15   References**

- 2   1.     Ehret, G.B. *et al.* Genetic variants in novel pathways influence blood pressure and cardiovascular disease  
3         risk. *Nature* **478**, 103-109 (2011).
- 4   2.     Smith, N.L. *et al.* Association of genome-wide variation with the risk of incident heart failure in adults of  
5         European and African ancestry: a prospective meta-analysis from the cohorts for heart and aging research  
6         in genomic epidemiology (CHARGE) consortium. *Circ Cardiovasc Genet* **3**, 256-66 (2010).
- 7   3.     Vasan, R.S. *et al.* Genetic variants associated with cardiac structure and function: a meta-analysis and  
8         replication of genome-wide association data. *JAMA* **302**, 168-78 (2009).
- 9   4.     Ikram, M.A. *et al.* Genomewide association studies of stroke. *N Engl J Med* **360**, 1718-28 (2009).
- 10  5.     Traylor, M. *et al.* Genetic risk factors for ischaemic stroke and its subtypes (the METASTROKE  
11         collaboration): a meta-analysis of genome-wide association studies. *Lancet Neurol* **11**, 951-62 (2012).
- 12  6.     Deloukas, P. *et al.* Large-scale association analysis identifies new risk loci for coronary artery disease. *Nat*  
13         *Genet* (2012).
- 14  7.     Pattaro, C. *et al.* Genome-wide association and functional follow-up reveals new loci for kidney function.  
15         *PLoS Genet* **8**, e1002584 (2012).
- 16  8.     Boger, C.A. *et al.* CUBN is a gene locus for albuminuria. *J Am Soc Nephrol* **22**, 555-70 (2011).
- 17  9.     Chambers, J.C. *et al.* Genetic loci influencing kidney function and chronic kidney disease. *Nat Genet* **42**,  
18         373-5 (2010).
- 19  10.    Bis, J.C. *et al.* Meta-analysis of genome-wide association studies from the CHARGE consortium identifies  
20         common variants associated with carotid intima media thickness and plaque. *Nat Genet* **43**, 940-947  
21         (2011).
- 22  11.    Jensen, R.A. *et al.* Genome-Wide Association Study of Retinopathy in Individuals without Diabetes. *PLoS*  
23         *One* **8**, e54232 (2013).
- 24  12.    Sim, X. *et al.* Genetic loci for retinal arteriolar microcirculation. *PLoS One* **8**, e65804 (2013).
- 25  13.    Voight, B.F. *et al.* The metabochip, a custom genotyping array for genetic studies of metabolic,  
26         cardiovascular, and anthropometric traits. *PLoS Genet* **8**, e1002793 (2012).
- 27  14.    Tobin, M.D., Sheehan, N.A., Scurrah, K.J. & Burton, P.R. Adjusting for treatment effects in studies of  
28         quantitative traits: antihypertensive therapy and systolic blood pressure. *Stat Med* **24**, 2911-35 (2005).
- 29  15.    Devlin, B. & Roeder, K. Genomic control for association studies. *Biometrics* **55**, 997-1004 (1999).
- 30  16.    Abecasis, G.R. *et al.* An integrated map of genetic variation from 1,092 human genomes. *Nature* **491**, 56-  
31         65 (2012).
- 32  17.    Consortium, I.H. The International HapMap Project. *Nature* **426**, 789-96 (2003).
- 33  18.    Willer, C.J., Li, Y. & Abecasis, G.R. METAL: fast and efficient meta-analysis of genomewide association  
34         scans. *Bioinformatics* **26**, 2190-1 (2010).
- 35  19.    R Development Core Team. R: A Language and Environment for Statistical Computing. (R Foundation for  
36         Statistical Computing, Vienna, Austria).
- 37  20.    Kent, W.J. *et al.* The human genome browser at UCSC. *Genome Res* **12**, 996-1006 (2002).
- 38  21.    Yang, J., Lee, S.H., Goddard, M.E. & Visscher, P.M. GCTA: a tool for genome-wide complex trait analysis.  
39         *Am J Hum Genet* **88**, 76-82 (2011).
- 40  22.    Yang, J. *et al.* Conditional and joint multiple-SNP analysis of GWAS summary statistics identifies additional  
41         variants influencing complex traits. *Nat Genet* **44**, 369-75, S1-3 (2012).

- 1 23. Pruim, R.J. *et al.* LocusZoom: regional visualization of genome-wide association scan results.  
2 *Bioinformatics* **26**, 2336-7 (2010).
- 3 24. Wakefield, J. A Bayesian measure of the probability of false discovery in genetic epidemiology studies. *Am*  
4 *J Hum Genet* **81**, 208-27 (2007).
- 5 25. Marchini, J., Howie, B., Myers, S., McVean, G. & Donnelly, P. A new multipoint method for genome-wide  
6 association studies by imputation of genotypes. *Nat. Genet* **39**, 906-913 (2007).
- 7 26. Wellcome Trust Case Control, C. *et al.* Bayesian refinement of association signals for 14 loci in 3 common  
8 diseases. *Nat Genet* **44**, 1294-301 (2012).
- 9 27. Penninx, B.W. *et al.* The Netherlands Study of Depression and Anxiety (NESDA): rationale, objectives and  
10 methods. *Int J Methods Psychiatr Res* **17**, 121-40 (2008).
- 11 28. Boomsma, D.I. *et al.* Netherlands Twin Register: from twins to twin families. *Twin Res Hum Genet* **9**, 849-  
12 57 (2006).
- 13 29. Jansen, R. *et al.* Sex differences in the human peripheral blood transcriptome. *BMC Genomics* **15**, 33  
14 (2014).
- 15 30. Wright, F.A. *et al.* Heritability and genomics of gene expression in peripheral blood. *Nat Genet* **46**, 430-7  
16 (2014).
- 17 31. Nivard, M.G. *et al.* Further confirmation of the association between anxiety and CTNND2: replication in  
18 humans. *Genes Brain Behav* **13**, 195-201 (2014).
- 19 32. Visscher, P.M., Benyamin, B. & White, I. The use of linear mixed models to estimate variance components  
20 from data on twin pairs by maximum likelihood. *Twin Res* **7**, 670-4 (2004).
- 21 33. Grundberg, E. *et al.* Mapping cis- and trans-regulatory effects across multiple tissues in twins. *Nat Genet*  
22 **44**, 1084-9 (2012).
- 23 34. Schunkert, H. *et al.* Large-scale association analysis identifies 13 new susceptibility loci for coronary artery  
24 disease. *Nat Genet* **43**, 333-8 (2011).
- 25 35. Folkersen, L. *et al.* Association of genetic risk variants with expression of proximal genes identifies novel  
26 susceptibility genes for cardiovascular disease. *Circ Cardiovasc Genet* **3**, 365-73 (2010).
- 27 36. Rodwell, G.E. *et al.* A transcriptional profile of aging in the human kidney. *PLoS Biol* **2**, e427 (2004).
- 28 37. Wheeler, H.E. *et al.* Sequential use of transcriptional profiling, expression quantitative trait mapping, and  
29 gene association implicates MMP20 in human kidney aging. *PLoS Genet* **5**, e1000685 (2009).
- 30 38. The Diabetes Control and Complications Trial (DCCT). Design and methodologic considerations for the  
31 feasibility phase. The DCCT Research Group. *Diabetes* **35**, 530-45 (1986).
- 32 39. Romanoski, C.E. *et al.* Network for activation of human endothelial cells by oxidized phospholipids: a  
33 critical role of heme oxygenase 1. *Circ Res* **109**, e27-41 (2011).
- 34 40. Koopmann, T.T. *et al.* Genome-wide identification of expression quantitative trait loci (eQTLs) in human  
35 heart. *PLoS One* **9**, e97380 (2014).
- 36 41. Fairfax, B.P. *et al.* Innate immune activity conditions the effect of regulatory variants upon monocyte gene  
37 expression. *Science* **343**, 1246949 (2014).
- 38 42. Ramasamy, A. *et al.* Genetic variability in the regulation of gene expression in ten regions of the human  
39 brain. *Nat Neurosci* **17**, 1418-28 (2014).
- 40 43. Maurano, M.T. *et al.* Systematic localization of common disease-associated variation in regulatory DNA.  
41 *Science* **337**, 1190-5 (2012).
- 42 44. Purcell, S. *et al.* PLINK: a tool set for whole-genome association and population-based linkage analyses.  
43 *Am J Hum Genet* **81**, 559-75 (2007).

- 1 45. Welter, D. *et al.* The NHGRI GWAS Catalog, a curated resource of SNP-trait associations. *Nucleic Acids Res*  
2 **42**, D1001-6 (2014).
- 3 46. Trynka, G. *et al.* Chromatin marks identify critical cell types for fine mapping complex trait variants. *Nat*  
4 *Genet* **45**, 124-30 (2013).
- 5 47. Ernst, J. *et al.* Mapping and analysis of chromatin state dynamics in nine human cell types. *Nature* **473**, 43-  
6 9 (2011).
- 7 48. Te Grotenhuis, M., Eisinga, R. & Pelzer, B. Saddlepoint approximations for the sum of independent non-  
8 identically distributed binomial random variables. *Statistica Neerlandica* **67**, 190-201 (2013).
- 9 49. Segre, A.V. *et al.* Common inherited variation in mitochondrial genes is not enriched for associations with  
10 type 2 diabetes or related glycemc traits. *PLoS Genet* **6**(2010).
- 11 50. Pers, T.H. *et al.* Biological interpretation of genome-wide association studies using predicted gene  
12 functions. *Nat Commun* **6**, 5890 (2015).
- 13 51. Fehrmann, R.S. *et al.* Gene expression analysis identifies global gene dosage sensitivity in cancer. *Nat*  
14 *Genet* **47**, 115-25 (2015).
- 15 52. Lage, K. *et al.* A human phenome-interactome network of protein complexes implicated in genetic  
16 disorders. *Nat Biotechnol* **25**, 309-16 (2007).
- 17 53. Bult CJ, R.J., Blake JA, Kadin JA, Ringwald M, Eppig JT, and the Mouse Genome Database Group. . Mouse  
18 genome informatics in a new age of biological inquiry. in *Proceedings of the IEEE International Symposium*  
19 *on Bio-Informatics and Biomedical Engineering* 29-32 (2000. ).
- 20 54. Croft, D. *et al.* Reactome: a database of reactions, pathways and biological processes. *Nucleic Acids Res*  
21 **39**, D691-7 (2011).
- 22 55. Kanehisa, M., Goto, S., Sato, Y., Furumichi, M. & Tanabe, M. KEGG for integration and interpretation of  
23 large-scale molecular data sets. *Nucleic Acids Res* **40**, D109-14 (2012).
- 24 56. Ashburner, M. *et al.* Gene ontology: tool for the unification of biology. The Gene Ontology Consortium.  
25 *Nat Genet* **25**, 25-9 (2000).
- 26 57. Magi, R. & Morris, A.P. GWAMA: software for genome-wide association meta-analysis. *BMC*  
27 *Bioinformatics* **11**, 288 (2010).
- 28 58. Dastani, Z. *et al.* Novel loci for adiponectin levels and their influence on type 2 diabetes and metabolic  
29 traits: a multi-ethnic meta-analysis of 45,891 individuals. *PLoS Genet* **8**, e1002607 (2012).
- 30 59. Johnson, T. Efficient Calculation for Multi-SNP Genetic Risk Scores. in *American Society of Human Genetics*  
31 (2012).
- 32 60. Kurogane, Y. *et al.* FGD5 mediates proangiogenic action of vascular endothelial growth factor in human  
33 vascular endothelial cells. *Arterioscler Thromb Vasc Biol* **32**, 988-96 (2012).
- 34 61. Korn, C. & Augustin, H.G. Born to die: blood vessel regression research coming of age. *Circulation* **125**,  
35 3063-5 (2012).
- 36 62. Ouyang, T. *et al.* Identification and characterization of a nuclear interacting partner of anaplastic  
37 lymphoma kinase (NIPA). *J Biol Chem* **278**, 30028-36 (2003).
- 38 63. Bassermann, F. *et al.* NIPA defines an SCF-type mammalian E3 ligase that regulates mitotic entry. *Cell* **122**,  
39 45-57 (2005).
- 40 64. Cubells, J.F. & Zabetian, C.P. Human genetics of plasma dopamine beta-hydroxylase activity: applications  
41 to research in psychiatry and neurology. *Psychopharmacology (Berl)* **174**, 463-76 (2004).
- 42 65. Zabetian, C.P. *et al.* A quantitative-trait analysis of human plasma-dopamine beta-hydroxylase activity:  
43 evidence for a major functional polymorphism at the DBH locus. *Am J Hum Genet* **68**, 515-22 (2001).

- 1 66. Mustapic, M. *et al.* The catecholamine biosynthetic enzyme dopamine beta-hydroxylase (DBH): first  
2 genome-wide search positions trait-determining variants acting additively in the proximal promoter. *Hum*  
3 *Mol Genet* (2014).
- 4 67. Chen, Y. *et al.* Human dopamine beta-hydroxylase (DBH) regulatory polymorphism that influences  
5 enzymatic activity, autonomic function, and blood pressure. *J Hypertens* **28**, 76-86 (2010).
- 6 68. Chen, Y. *et al.* Human dopamine beta-hydroxylase promoter variant alters transcription in chromaffin  
7 cells, enzyme secretion, and blood pressure. *Am J Hypertens* **24**, 24-32 (2011).
- 8 69. Rask-Madsen, C. & Kahn, C.R. Tissue-specific insulin signaling, metabolic syndrome, and cardiovascular  
9 disease. *Arterioscler Thromb Vasc Biol* **32**, 2052-9 (2012).
- 10 70. Asselbergs, F.W. *et al.* Large-scale gene-centric meta-analysis across 32 studies identifies multiple lipid  
11 loci. *Am J Hum Genet* **91**, 823-38 (2012).
- 12 71. Duncan, E.R. *et al.* Effect of endothelium-specific insulin resistance on endothelial function in vivo.  
13 *Diabetes* **57**, 3307-14 (2008).
- 14 72. Manrique, C., Lastra, G. & Sowers, J.R. New insights into insulin action and resistance in the vasculature.  
15 *Ann N Y Acad Sci* **1311**, 138-50 (2014).
- 16 73. Symons, J.D. *et al.* Knockout of insulin receptors in cardiomyocytes attenuates coronary arterial  
17 dysfunction induced by pressure overload. *Am J Physiol Heart Circ Physiol* **300**, H374-81 (2011).
- 18 74. Guo, S. Insulin signaling, resistance, and the metabolic syndrome: insights from mouse models into  
19 disease mechanisms. *J Endocrinol* **220**, T1-T23 (2014).
- 20 75. Wu, L.C. *et al.* The mouse DNA binding protein Rc for the kappa B motif of transcription and for the V(D)J  
21 recombination signal sequences contains composite DNA-protein interaction domains and belongs to a  
22 new family of large transcriptional proteins. *Genomics* **35**, 415-24 (1996).
- 23 76. Hicar, M.D., Liu, Y., Allen, C.E. & Wu, L.C. Structure of the human zinc finger protein HIVEP3: molecular  
24 cloning, expression, exon-intron structure, and comparison with paralogous genes HIVEP1 and HIVEP2.  
25 *Genomics* **71**, 89-100 (2001).
- 26 77. Jones, D.C. *et al.* Regulation of adult bone mass by the zinc finger adapter protein Schnurri-3. *Science* **312**,  
27 1223-7 (2006).
- 28 78. Shim, J.H. *et al.* Schnurri-3 regulates ERK downstream of WNT signaling in osteoblasts. *J Clin Invest* **123**,  
29 4010-22 (2013).
- 30 79. Leung, A. *et al.* Novel long noncoding RNAs are regulated by angiotensin II in vascular smooth muscle  
31 cells. *Circ Res* **113**, 266-78 (2013).
- 32 80. Balint, I., Muller, A., Nagy, A. & Kovacs, G. Cloning and characterisation of the RBCC728/TRIM36 zinc-  
33 binding protein from the tumor suppressor gene region at chromosome 5q22.3. *Gene* **332**, 45-50 (2004).
- 34 81. Hatakeyama, S. TRIM proteins and cancer. *Nat Rev Cancer* **11**, 792-804 (2011).
- 35 82. Miyajima, N., Maruyama, S., Nonomura, K. & Hatakeyama, S. TRIM36 interacts with the kinetochore  
36 protein CENP-H and delays cell cycle progression. *Biochem Biophys Res Commun* **381**, 383-7 (2009).
- 37 83. Takayama, K. *et al.* Integration of cap analysis of gene expression and chromatin immunoprecipitation  
38 analysis on array reveals genome-wide androgen receptor signaling in prostate cancer cells. *Oncogene* **30**,  
39 619-30 (2011).
- 40 84. Venerando, A., Ruzzene, M. & Pinna, L.A. Casein kinase: the triple meaning of a misnomer. *Biochem J* **460**,  
41 141-56 (2014).
- 42 85. Minakuchi, M. *et al.* Identification and characterization of SEB, a novel protein that binds to the acute  
43 undifferentiated leukemia-associated protein SET. *Eur J Biochem* **268**, 1340-51 (2001).
- 44 86. Hoischen, A. *et al.* De novo mutations of SETBP1 cause Schinzel-Giedion syndrome. *Nat Genet* **42**, 483-5  
45 (2010).



- 1 87. Sakaguchi, H. *et al.* Exome sequencing identifies secondary mutations of SETBP1 and JAK3 in juvenile  
2 myelomonocytic leukemia. *Nat Genet* **45**, 937-41 (2013).
- 3 88. Horike, N., Takemori, H., Katoh, Y., Doi, J. & Okamoto, M. Roles of several domains identified in the  
4 primary structure of salt-inducible kinase (SIK). *Endocrine research* **28**, 291-4 (2002).
- 5 89. Lizcano, J.M. *et al.* LKB1 is a master kinase that activates 13 kinases of the AMPK subfamily, including  
6 MARK/PAR-1. *The EMBO journal* **23**, 833-43 (2004).
- 7 90. Hashimoto, Y.K., Satoh, T., Okamoto, M. & Takemori, H. Importance of autophosphorylation at Ser186 in  
8 the A-loop of salt inducible kinase 1 for its sustained kinase activity. *Journal of cellular biochemistry* **104**,  
9 1724-39 (2008).
- 10 91. Stenstro, K. *et al.* SIK1 is part of a cell sodium-sensing network that regulates active sodium transport  
11 through a calcium-dependent process. (2007).
- 12 92. Jaitovich, A. & Bertorello, A.M. Intracellular sodium sensing: SIK1 network, hormone action and high blood  
13 pressure. *Biochimica et biophysica acta* **1802**, 1140-9 (2010).
- 14 93. Stenström, K., Takemori, H., Bianchi, G., Katz, A.I. & Bertorello, A.M. Blocking the salt-inducible kinase 1  
15 network prevents the increases in cell sodium transport caused by a hypertension-linked mutation in  
16 human alpha-adducin. *Journal of hypertension* **27**, 2452-7 (2009).
- 17 94. Romito, A. *et al.* Lack of sik1 in mouse embryonic stem cells impairs cardiomyogenesis by down-regulating  
18 the cyclin-dependent kinase inhibitor p57kip2. *PLoS one* **5**, e9029 (2010).
- 19 95. Watkins, H. *et al.* Mutations in the cardiac myosin binding protein-C gene on chromosome 11 cause  
20 familial hypertrophic cardiomyopathy. *Nature genetics* **11**, 434-7 (1995).
- 21 96. Sadayappan, S. & de Tombe, P.P. Cardiac myosin binding protein-C as a central target of cardiac  
22 sarcomere signaling: a special mini review series. *Pflügers Archiv : European journal of physiology* **466**,  
23 195-200 (2014).
- 24 97. Bonne, G. *et al.* Cardiac myosin binding protein-C gene splice acceptor site mutation is associated with  
25 familial hypertrophic cardiomyopathy. *Nature genetics* **11**, 438-40 (1995).
- 26 98. Tong, C.W., Nair, N.a., Doersch, K.M., Liu, Y. & Rosas, P.C. Cardiac myosin-binding protein-C is a critical  
27 mediator of diastolic function. *Pflügers Archiv : European journal of physiology* **466**, 451-7 (2014).
- 28 99. Ho, J.E. *et al.* Discovery and replication of novel blood pressure genetic loci in the Women's Genome  
29 Health Study. *J Hypertens* **29**, 62-9 (2011).
- 30 100. Padmanabhan, S. *et al.* Genome-Wide Association Study of Blood Pressure Extremes Identifies Variant  
31 near UMOD Associated with Hypertension. *PLoS Genet* **6**, e1001177 (2010).
- 32 101. Takeuchi, F. *et al.* Blood pressure and hypertension are associated with 7 loci in the Japanese population.  
33 *Circulation* **121**, 2302-9 (2010).
- 34 102. Johnson, A.D. *et al.* Association of hypertension drug target genes with blood pressure and hypertension  
35 in 86,588 individuals. *Hypertension* **57**, 903-10 (2011).
- 36 103. Johnson, T. *et al.* Blood pressure loci identified with a gene-centric array. *The American Journal of Human*  
37 *Genetics* (2011).
- 38 104. Kato, N. *et al.* Meta-analysis of genome-wide association studies identifies common variants associated  
39 with blood pressure variation in east Asians. *Nat Genet* **43**, 531-8 (2011).
- 40 105. Salvi, E. *et al.* Genomewide association study using a high-density single nucleotide polymorphism array  
41 and case-control design identifies a novel essential hypertension susceptibility locus in the promoter  
42 region of endothelial NO synthase. *Hypertension* **59**, 248-255 (2012).
- 43 106. Wain, L.V. *et al.* Genome-wide association study identifies six new loci influencing pulse pressure and  
44 mean arterial pressure. *Nature Genetics* (2011).

- 1 107. Ganesh, S.K. *et al.* Loci influencing blood pressure identified using a cardiovascular gene-centric array.  
2 *Hum Mol Genet* (2013).
- 3 108. Kato, N. *et al.* Trans-ancestry genome-wide association study identifies 12 genetic loci influencing blood  
4 pressure and implicates a role for DNA methylation. *Nat Genet* **47**, 1282-93 (2015).
- 5

## 1 **16 Acknowledgments**

2 58BC: We are grateful for using the British 1958 Birth Cohort DNA collection. Sample collection funded  
3 by the Medical Research Council grant G0000934 and the Wellcome Trust grant 068545/Z/02.  
4 Genotyping was funded by the Wellcome Trust.

5 ADVANCE: The ADVANCE study was supported by a grant from the Reynold's Foundation and NHLBI  
6 grant HL087647.

7 AGES Reykjavik: The AGES Reykjavik study was supported by National Institutes of Health (contracts  
8 N01-AG-12100 and HHSN271201200022C); the National Institute on Aging Intramural Research  
9 Program; Hjartavernd (the Icelandic Heart Association);the Althingi (the Icelandic Parliament)

10 allele-specific FAIRE: AJPS was supported by a British Heart Foundation (BHF) grant (FS/13/6/29977), FD  
11 was supported by a BHF grant (RG08/008)

12 AMC-PAS: We thank Aicha Ait Soussan for technical assistance and the WTSI Genotyping Facility for  
13 conducting the genotyping

14 Amish: The Amish studies are supported by grants and contracts from the NIH, including R01 AG18728,  
15 R01 HL088119, U01 GM074518, U01 HL072515-06, U01 HL84756, R01 DK54261,the University of  
16 Maryland General Clinical Research Center, grant M01 RR 16500, the Mid-Atlantic Nutrition Obesity  
17 Research Center grant P30 DK72488, the Baltimore Diabetes Research and Training Center grant  
18 P60DK79637, and by the T32 training grant AG000219 . In addition, this project was supported by  
19 National Research Initiative Competitive Grant no. 2007-35205-17883 from the USDA National Institute  
20 of Food and Agriculture. We gratefully thank our Amish community and research volunteers for their  
21 long-standing partnership in research, and acknowledge the dedication of our Amish liaisons, field  
22 workers and the Amish Research Clinic staff, without which these studies would not have been possible.

23 analysis group: This work forms part of the research themes contributing to the translational research  
24 portfolio for the NIHR Barts Cardiovascular Biomedical Research Unit (Patricia Munroe). G.B.E. is  
25 supported by the University of Geneva, NHLBI (R01HL086694), the Swiss National Foundation (FN  
26 33CM30-124087), and by the "Fondation pour Recherches Médicales" and the GeCor foundation. A.P.M.  
27 is a Wellcome Trist Senior Research Fellow in Basic Biomedical Science (grant number WT098017).

28 ARIC: The Atherosclerosis Risk in Communities Study is carried out as a collaborative study supported by  
29 National Heart, Lung, and Blood Institute contracts (HHSN268201100005C, HHSN268201100006C,  
30 HHSN268201100007C, HHSN268201100008C, HHSN268201100009C, HHSN268201100010C,  
31 HHSN268201100011C, and HHSN268201100012C), R01HL087641, R01HL59367 and R01HL086694;  
32 National Human Genome Research Institute contract U01HG004402; and National Institutes of Health  
33 contract HHSN268200625226C. Funding support for the Genetic Epidemiology of Causal Variants Across  
34 the Life Course (CALiCo) program was provided through the NHGRI PAGE program (U01 HG007416). The  
35 authors thank the staff and participants of the ARIC study for their important contributions. G.B.E is  
36 supported by the Swiss National Foundation SPUM project FN 33CM30-124087, Geneva University, and  
37 the Fondation pour Recherches Médicales, Genève. The authors thank the staff and participants of the  
38 ARIC study for their important contributions.

39 ASCOT: This work was supported by Pfizer, New York, NY, USA, for the ASCOT study and the collection of  
40 the ASCOT DNA repository; by Servier Research Group, Paris, France; and by Leo Laboratories,  
41 Copenhagen, Denmark. We thank all ASCOT trial participants, physicians, nurses, and practices in the

1 participating countries for their important contribution to the study. In particular we thank Clare  
2 Muckian and David Toomey for their help in DNA extraction, storage, and handling. This work forms part  
3 of the research themes contributing to the translational research portfolio for the NIHR Barts  
4 Cardiovascular Biomedical Research Unit (Mark Caulfield and Patricia Munroe). Genotyping was funded  
5 by the Wellcome Trust.

6 BLSA: The BLSA was supported by the Intramural Research Program of the NIH, National Institute on  
7 Aging.

8 BRIGHT: This work was supported by the Medical Research Council of Great Britain (grant number  
9 G9521010D); and by the British Heart Foundation (grant number PG/02/128). A.F.D. was supported by  
10 the British Heart Foundation (grant numbers RG/07/005/23633, SP/08/005/25115); and by the  
11 European Union Ingenious HyperCare Consortium: Integrated Genomics, Clinical Research, and Care in  
12 Hypertension (grant number LSHM-C7-2006-037093). The BRIGHT study is extremely grateful to all the  
13 patients who participated in the study and the BRIGHT nursing team. This work forms part of the  
14 research themes contributing to the translational research portfolio for the NIHR Barts Cardiovascular  
15 Biomedical Research Unit (Mark Caulfield and Patricia Munroe). Genotyping was funded by the  
16 Wellcome Trust.

17 Cardiogenics: Cardiogenics Project was funded by the European Union (LSHM-CT 2006-037593). We  
18 thank the WTSI Genotyping Facility for conducting the genotyping. Data analysis was in part funded by  
19 BHF programme grant CRM:0022772 to Deloukas.

20 CHARGE EYE: This work was supported by multiple funding agencies and details for each cohort were  
21 given below. The Age, Gene/Environment Susceptibility – Reykjavik Study was funded by the Intramural  
22 Research Program of the National Institute on Aging (ZIAAG007380, National Institutes of Health (NIH)  
23 contract N01-AG-12100); and the National Eye Institute (ZIAEY000401) at the NIH in the United States;  
24 Hjartavernd (the Icelandic Heart Association); and the Althingi (the Icelandic Parliament). The  
25 Atherosclerosis Risk in Communities Study is carried out as a collaborative study supported by National  
26 Heart, Lung, and Blood Institute contracts (HHSN268201100005C, HHSN268201100006C,  
27 HHSN268201100007C, HHSN268201100008C, HHSN268201100009C,  
28 HHSN268201100010C, HHSN268201100011C, and HHSN268201100012C), R01HL087641, R01HL59367  
29 and R01HL086694; National Human Genome Research Institute contract U01HG004402; and National  
30 Institutes of Health contract HHSN268200625226C. Infrastructure was partly supported by Grant  
31 Number UL1RR025005, a component of the National Institutes of Health and NIH Roadmap for Medical  
32 Research. The Cardiovascular Health Study research reported in this article was supported by the  
33 National Heart, Lung, and Blood Institute (NHLBI) contracts N01-HC-85239, N01-HC-85079 through N01-  
34 HC-85086, N01-HC-35129, N01 HC-15103, N01 HC-55222, N01-HC-75150, N01-HC-45133, and grants  
35 HL075366, HL080295, HL087652, with additional contribution from the National Institute of Neurological  
36 Disorders and Stroke (NINDS). This research was also supported by the National Institute on Aging (NIA)  
37 contracts AG-023269, AG-15928, AG-20098, and AG-027058. A full list of principal CHS investigators and  
38 institutions can be found at <http://www.chs-nhlbi.org/pi.htm>. DNA handling and genotyping was  
39 supported in part by National Center for Research Resources grant M01-RR00425 to the Cedars-Sinai  
40 General Clinical Research Center Genotyping core and National Institute of Diabetes and Digestive and  
41 Kidney Diseases grant DK063491 to the Southern California Diabetes Endocrinology Research Center.  
42 Additional funding came from the Cedars-Sinai Board of Governors' Chair in Medical Genetics (JIR) and  
43 the National Heart, Lung, and Blood Institute Training Grant T32HL007902 (RAJ). The GWA database of  
44 the Rotterdam Study was funded through the Netherlands Organization of Scientific Research NWO (no.  
45 175.010.2005.011). This study was further supported by the Netherlands Genomics Initiative  
46 (NGI)/Netherlands Organisation for Scientific Research (NWO) project nr. 050-060-810. The Rotterdam

1 Study is supported by the Erasmus Medical Center and Erasmus University, Rotterdam; the Netherlands  
2 Organization for scientific research (NWO); the Netherlands Organization for the Health Research and  
3 Development (ZonMw); The Research Institute for Diseases in the Elderly (RIDE); the Ministry of  
4 Education, Culture, and Science; the Ministry for Health, Welfare, and Sports; The European commission  
5 (DG XII); and the Municipality of Rotterdam. The ophthalmic part of the Rotterdam Study was supported  
6 by Lijf en Leven, Krimpen a/d Lek; MD Fonds, Utrecht. Oogfonds Nederland, Utrecht; Stichting  
7 Nederlands Oogheelkundig Onderzoek, Nijmegen/Rotterdam; Swart van Essen, Rotterdam; Netherlands  
8 Organisation for Scientific Research (NWO); Bevordering van Volkskracht, Rotterdam; Blindenhulp, The  
9 Hague; Rotterdamse Vereniging Blindenbelangen, Rotterdam; OOG, The Hague; Algemene Nederlandse  
10 Vereniging ter Voorkoming van Blindheid, Doorn; Blinden-Penning, Amsterdam; Blindenhulp,  
11 Gravenzande; Henkes Stichting, Rotterdam; Topcon Europe BV, Capelle aan de IJssel; Medical Workshop  
12 BV, Groningen; all in the Netherlands; Heidelberg Engineering, Dossenheim, Germany. The Blue  
13 Mountains Eye Study has been supported by the Australian National Health & Medical Research Council,  
14 Canberra Australia (Grant Numbers 974159, 211069, 457349, 512423, 475604, 529912, and the funding  
15 for Centre for Clinical Research Excellence in Translational Clinical Research in Eye Diseases, CCRE in  
16 TCR-Eye); In addition, funding by the Wellcome Trust, UK as part of Wellcome Trust Case Control  
17 Consortium 2 (A Viswanathan, P McGuffin, P Mitchell, F Topouzis, P Foster) has supported the  
18 genotyping costs of the entire BMES population (Grant numbers 085475/B/08/Z and 085475/08/Z). We  
19 also acknowledge the funding body National Institutes of Health Research (NIHR) Biomedical Research  
20 Centre for Ophthalmology, Moorfields Eye Hospital and UCL Institute of Ophthalmology, London, UK.  
21 The Australian Twin Registry is supported by an Australian National Health and Medical Research  
22 Council (NHMRC) Enabling Grant (2004–2009). We also thank the following organisations for their  
23 financial support: Clifford Craig Medical Research Trust, Ophthalmic Research Institute of Australia  
24 (ORIA), Glaucoma Australia, American Health Assistance Foundation (AHAf), Peggy and Leslie  
25 Cranbourne Foundation, Foundation for Children, NHMRC project grant (2005–2007), Jack Brockhoff  
26 Foundation, NEI Project Grant (2007–2010). Genotyping for part of the Australian sample was funded by  
27 an NHMRC Medical Genomics Grant. Genotyping for the remainder was performed by the NIH Center  
28 for Inherited Research (CIDR) as part of an NIH/National Eye Institute (NEI) grant 1R01EY018246,  
29 Principal Investigator Terri L Young and we are grateful to Dr Camilla Day and staff. Australian sample  
30 imputation analyses were carried out on the Genetic Cluster Computer, which is financially supported by  
31 the Netherlands Scientific Organization (NWO 480-05-003). The Multi-Ethnic Study of Atherosclerosis  
32 (MESA) and MESA SNP Health Association Resource (SHARe) are conducted and supported by the  
33 National Heart, Lung, and Blood Institute (NHLBI) in collaboration with MESA investigators. MESA and  
34 the MESA SHARe project are conducted and supported by the National Heart, Lung, and Blood Institute  
35 (NHLBI) in collaboration with MESA investigators. Support is provided by grants and contracts N01 HC-  
36 95159, N01-HC-95160, N01-HC-95161, N01-HC-95162, N01-HC-95163, N01-HC-95164, N01-HC-95165,  
37 N01-HC-95166, N01-HC-95167, N01-HC-95168, N01-HC-95169 and RR-024156. Funding for SHARe  
38 genotyping was provided by NHLBI Contract N02-HL-6-4278. The funders had no role in study design,  
39 data collection and analysis, decision to publish, or preparation of the manuscript.

40 CHARGE-HF consortium: ARIC Study: The ARIC Study is carried out as a collaborative study supported by  
41 National Heart, Lung, and Blood Institute (NHLBI) contracts (HHSN268201100005C,  
42 HHSN268201100006C, HHSN268201100007C, HHSN268201100008C, HHSN268201100009C,  
43 HHSN268201100010C, HHSN268201100011C, and HHSN268201100012C), R01HL087641, R01HL59367  
44 and R01HL086694; National Human Genome Research Institute contract U01HG004402; and National  
45 Institutes of Health contract HHSN268200625226C. The authors thank the staff and participants of the  
46 ARIC study for their important contributions. CHS: This CHS research was supported by NHLBI contracts  
47 HHSN268201200036C, HSN268200800007C, N01HC55222, N01HC85079, N01HC85080, N01HC85081,  
48 N01HC85082, N01HC85083, N01HC85086; and NHLBI grants U01HL080295, R01HL087652,  
49 R01HL105756, R01HL103612, and R01HL120393 with additional contribution from the National Institute

1 of Neurological Disorders and Stroke (NINDS). Additional support was provided through R01AG023629  
2 from the National Institute on Aging (NIA). A full list of principal CHS investigators and institutions can be  
3 found at CHS-NHLBI.org. The provision of genotyping data was supported in part by the National Center  
4 for Advancing Translational Sciences, CTSI grant UL1TR000124, and the National Institute of Diabetes  
5 and Digestive and Kidney Disease Diabetes Research Center (DRC) grant DK063491 to the Southern  
6 California Diabetes Endocrinology Research Center. The content is solely the responsibility of the  
7 authors and does not necessarily represent the official views of the National Institutes of Health. FHS:  
8 The FHS was supported by NHLBI (Contract No. N01-HC-25195) and its contract with Affymetrix, Inc for  
9 genotyping services (Contract No. N02-HL-6-4278). This work was also supported in part by grants from  
10 the NHLBI 2K24HL04334, R01HL077477, and R01HL093328 (all to RSV). A portion of this research  
11 utilized the Linux Cluster for Genetic Analysis (LinGA-II) funded by the Robert Dawson Evans Endowment  
12 of the Department of Medicine at Boston University School of Medicine and Boston Medical Center. The  
13 analyses reflect intellectual input and resource development from the FHS investigators participating in  
14 the SNP Health Association Resource (SHARe) project. The generation and management of GWAS  
15 genotype data for the Rotterdam Study is supported by the Netherlands Organisation of Scientific  
16 Research NWO Investments (nr. 175.010.2005.011, 911-03-012). This study is funded by the Research  
17 Institute for Diseases in the Elderly (014-93-015; RIDE2), the Netherlands Genomics Initiative  
18 (NGI)/Netherlands Organisation for Scientific Research (NWO) project nr. 050-060-810. We thank Pascal  
19 Arp, Mila Jhamai, Marijn Verkerk, Lizbeth Herrera and Marjolein Peters for their help in creating the  
20 GWAS database, and Karol Estrada and Maksim V. Struchalin for their support in creation and analysis of  
21 imputed data. The Rotterdam Study is funded by Erasmus Medical Center and Erasmus University,  
22 Rotterdam, Netherlands Organization for the Health Research and Development (ZonMw), the Research  
23 Institute for Diseases in the Elderly (RIDE), the Ministry of Education, Culture and Science, the Ministry  
24 for Health, Welfare and Sports, the European Commission (DG XII), and the Municipality of Rotterdam.  
25 The authors are grateful to the study participants, the staff of the Rotterdam Study and the participating  
26 general practitioners and pharmacists. For a full list of CHARGE-HF working group members contributing  
27 to this work, please see PMID 20445134.

28 CHS: Cardiovascular Health Study: This CHS research was supported by NHLBI contracts  
29 HHSN268201200036C, HHSN268200800007C, N01HC55222, N01HC85079, N01HC85080, N01HC85081,  
30 N01HC85082, N01HC85083, N01HC85086; and NHLBI grants U01HL080295, R01HL087652,  
31 R01HL105756, R01HL103612, and R01HL120393 with additional contribution from the National Institute  
32 of Neurological Disorders and Stroke (NINDS). Additional support was provided through R01AG023629  
33 from the National Institute on Aging (NIA). A full list of principal CHS investigators and institutions can be  
34 found at CHS-NHLBI.org. The provision of genotyping data was supported in part by the National Center  
35 for Advancing Translational Sciences, CTSI grant UL1TR000124, and the National Institute of Diabetes  
36 and Digestive and Kidney Disease Diabetes Research Center (DRC) grant DK063491 to the Southern  
37 California Diabetes Endocrinology Research Center. The content is solely the responsibility of the  
38 authors and does not necessarily represent the official views of the National Institutes of Health.

39 CKDGen: Mathias Gorski - Else-Kröner-Fresenius-Stiftung (2012\_A147)

40 CLHNS: We thank the Office of Population Studies Foundation research and data collection teams for  
41 the Cebu Longitudinal Health and Nutrition Survey. This work was supported by National Institutes of  
42 Health grants DK078150, TW05596, HL085144, TW008288 and pilot funds from RR20649, ES10126, and  
43 DK56350.

44 COGENT: The following studies contributed discovery data for the COGENT-BP consortium: BioVU: The  
45 dataset(s) used for the analyses described were obtained from Vanderbilt University Medical Center's  
46 BioVU which is supported by institutional funding and by the Vanderbilt CTSA grant 1UL1RR024975-01

1 from NCRR/NIH. Support was also provided by Vanderbilt Clinical and Translational Research Scholar  
2 award (5KL2RR024975 to TLE), and Additional support was provided by the Building Interdisciplinary  
3 Research Careers in Women's Health career development program (K12HD4383 to DRVE). Bogalusa  
4 Heart Study (BHS): NJS is supported in part by NIH/NCRR Grant Number UL1 RR025774. The BHS was  
5 supported by grants HD-061437 and HD-062783 from the National Institute of Child Health and Human  
6 Development, and AG-16592 from the National Institute on Aging. CARE Acknowledgement: The  
7 authors wish to acknowledge the support of the National Heart, Lung, and Blood Institute and the  
8 contributions of the research institutions, study investigators, field staff and study participants in  
9 creating this resource for biomedical research. The following nine parent studies have contributed  
10 parent study data, ancillary study data, and DNA samples through the Broad Institute (N01-HC-65226) to  
11 create this genotype/phenotype data base for wide dissemination to the biomedical research  
12 community. This work was also funded by the Center of Excellence in Personalized Medicine (CEPMED),  
13 the Canada Research Chair program, the "Fonds de recherche du Québec en Santé (FRQS)", and the  
14 "Fondation de l'Institut de Cardiologie de Montréal" (to GL). Atherosclerotic Risk in Communities (ARIC):  
15 University of North Carolina at Chapel Hill (N01-HC-55015), Baylor Medical College (N01-HC-55016),  
16 University of Mississippi Medical Center (N01-HC-55021), University of Minnesota (N01-HC-55019),  
17 Johns Hopkins University (N01-HC-55020), University of Texas, Houston (N01-HC-55017), University of  
18 North Carolina, Forsyth County (N01-HC-55018). Cardiovascular Health Study (CHS): University of  
19 Washington (N01-HC-85079), Wake Forest University (N01-HC-85080), Johns Hopkins University (N01-  
20 HC-85081), University of Pittsburgh (N01-HC-85082), University of California, Davis (N01-HC-85083),  
21 University of California, Irvine (N01-HC-85084), New England Medical Center (N01-HC-85085), University  
22 of Vermont (N01-HC-85086), Georgetown University (N01-HC-35129), Johns Hopkins University (N01  
23 HC-15103), University of Wisconsin (N01-HC-75150), Geisinger Clinic (N01-HC-45133), University of  
24 Washington (N01 HC-55222, U01 HL080295); Cleveland Family Study (CFS): Case Western Reserve  
25 University (RO1 HL46380-01-16); Coronary Artery Risk in Young Adults (CARDIA): University of Alabama  
26 at Birmingham (N01-HC-48047), University of Minnesota (N01-HC-48048), Northwestern University  
27 (N01-HC-48049), Kaiser Foundation Research Institute (N01-HC-48050), University of Alabama at  
28 Birmingham (N01-HC-95095), Tufts-New England Medical Center (N01-HC-45204), Wake Forest  
29 University (N01-HC-45205), Harbor-UCLA Research and Education Institute (N01-HC-05187), University  
30 of California, Irvine (N01-HC-45134, N01-HC-95100); Multi-Ethnic Study of Atherosclerosis (MESA):  
31 MESA is conducted and supported by the National Heart, Lung, and Blood Institute (NHLBI) in  
32 collaboration with MESA investigators. Support for MESA is provided by contracts N01-HC-95159  
33 through N01-HC-95169 and UL1-RR-024156. Funding for genotyping was provided by NHLBI Contract  
34 N02-HL-6-4278 and N01-HC-65226. CHS: This CHS research was supported by NHLBI contracts N01-HC-  
35 85239, N01-HC-85079 through N01-HC-85086; N01-HC-35129, N01 HC-15103, N01 HC-55222, N01-HC-  
36 75150, N01-HC-45133, HHSN268201200036C and NHLBI grants HL080295, HL-085251, HL087652,  
37 HL105756 with additional contribution from NINDS. Additional support was provided through AG-  
38 023629, AG-15928, AG-20098, and AG-027058 from the NIA. See also <http://www.chs-nhlbi.org/pi.htm>.  
39 DNA handling and genotyping was supported in part by National Center of Advancing Translational  
40 Technologies CTSI grant UL1TR000124 and National Institute of Diabetes and Digestive and Kidney  
41 Diseases grant DK063491 to the Southern California Diabetes Endocrinology Research Center and the  
42 Cedars-Sinai Board of Governors' Chair in Medical Genetics (JIR). GeneSTAR: GeneSTAR was supported  
43 by NIH grants through the National Institute of Nursing Research (NR0224103) and the National Heart,  
44 Lung, and Blood Institute (HL58625-01A1, HL59684, HL071025-01A1, U01HL72518, and HL087698); and  
45 by M01-RR000052 to the Johns Hopkins General Clinical Research Center. GENOA: Genetic  
46 Epidemiology Network of Arteriopathy (GENOA) study is supported by the National Institutes of Health,  
47 grant numbers HL087660 and HL100245 from the National Heart, Lung, Blood Institute. HANDLS: The  
48 Healthy Aging in Neighborhoods of Diversity across the Life Span Study (HANDLS) research was  
49 supported by the Intramural Research Program of the NIH, National Institute on Aging and the National

1 Center on Minority Health and Health Disparities (project # Z01-AG000513 and human subjects protocol  
2 # 2009-149). Data analyses for the HANDLS study utilized the high-performance computational  
3 capabilities of the Biowulf Linux cluster at the National Institutes of Health, Bethesda, Md.  
4 (<http://biowulf.nih.gov>). HealthABC: Health ABC was funded by the National Institutes of Aging. This  
5 research was supported by NIA contracts N01AG62101, N01AG62103, and N01AG62106. The GWAS was  
6 funded by NIA grant 1R01AG032098-01A1 to Wake Forest University Health Sciences and genotyping  
7 services were provided by the Center for Inherited Disease Research (CIDR). CIDR is fully funded through  
8 a federal contract from the National Institutes of Health to The Johns Hopkins University, contract  
9 number HHSN268200782096C. This research was supported in part by the Intramural Research  
10 Program of the NIH, National Institute on Aging. HUFs: The Howard University Family Study was  
11 supported by National Institutes of Health grants S06GM008016-320107 to Charles Rotimi and  
12 S06GM008016-380111 to Adebawale Adeyemo. We thank the participants of the study, for which  
13 enrollment was carried out at the Howard University General Clinical Research Center, supported by  
14 National Institutes of Health grant 2M01RR010284. The contents of this publication are solely the  
15 responsibility of the authors and do not necessarily represent the official view of the National Institutes  
16 of Health. This research was supported in part by the Intramural Research Program of the Center for  
17 Research on Genomics and Global Health (CRGGH). The CRGGH is supported by the National Human  
18 Genome Research Institute, the National Institute of Diabetes and Digestive and Kidney Diseases, the  
19 Center for Information Technology, and the Office of the Director at the National Institutes of Health  
20 (Z01HG200362). Genotyping support was provided by the Coriell Institute for Medical Research.  
21 HyperGEN: The hypertension network is funded by cooperative agreements (U10) with NHLBI: HL54471,  
22 HL54472, HL54473, HL54495, HL54496, HL54497, HL54509, HL54515, and 2 R01 HL55673-12. The study  
23 involves: University of Utah (Network Coordinating Center, Field Center, and Molecular Genetics Lab);  
24 Univ. of Alabama at Birmingham (Field Center and Echo Coordinating and Analysis Center); Medical  
25 College of Wisconsin (Echo Genotyping Lab); Boston University (Field Center); University of Minnesota  
26 (Field Center and Biochemistry Lab); University of North Carolina (Field Center); Washington University  
27 (Data Coordinating Center); Weil Cornell Medical College (Echo Reading Center); National Heart, Lung, &  
28 Blood Institute. For a complete list of HyperGEN Investigators please see:  
29 [www.biostat.wustl.edu/hypergen/Acknowledge.html](http://www.biostat.wustl.edu/hypergen/Acknowledge.html) Loyola-Nigeria: The Loyola-Nigeria study was  
30 supported by NIH grant numbers R01-HL053353. The authors acknowledge the assistance of the  
31 research staff and participants in Ibadan and Igbo-Ora, Oyo State, Nigeria. Loyola-Maywood: Maywood  
32 African-American study is supported by the National Institutes of Health grant number HL074166 from  
33 National Heart, Lung, Blood Institute. SIGNET: We would like to thank all of the participants of the  
34 REGARDS Study for their valuable contributions, as well as REGARDS investigators and staff. The  
35 REGARDS Study research was supported by a cooperative agreement U01 NS041588 (Howard) and R01  
36 DK084350 (Sale) from the National Institutes of Health. WHI: The WHI program is funded by the  
37 National Heart, Lung, and Blood Institute, National Institutes of Health, U.S. Department of Health and  
38 Human Services through contracts N01WH22110, 24152, 32100-2, 32105-6, 32108-9, 32111-13, 32115,  
39 32118-32119, 32122, 42107-26, 42129-32, and 44221. COGENT-BP is funded through R21HL123677-02  
40 to N.F.

41 CoLaus: The CoLaus study was and is supported by research grants from GlaxoSmithKline, the Faculty of  
42 Biology and Medicine of Lausanne, and the Swiss National Science Foundation (grants 3200B0-105993,  
43 3200B0-118308, 33CSCO-122661, 33CS30-139468 and 33CS30-148401).

44 DEPICT: T.H.P is supported by The Danish Council for Independent Research Medical Sciences (FSS) The  
45 Alfred Benzon Foundation and The Lundbeck Foundation.

46 DESIR: We thank all the participants of the D.E.S.I.R study, Elodie Eury for technical support for the  
47 genotyping, Olivier Lantieri and Michel Marre from the D.E.S.I.R study. The genotyping was supported by



1 the “Conseil Régional Nord-Pas-de-Calais Fonds européen de développement économique et regional”  
2 CPER axe Cartdiodiabète 2010-2011 grant to NB-N.

3 DGI: We thank the participants of Sweden and Finland who contributed to the DGI study. C.N.-C. was  
4 supported by the National Institutes of Health (HL080025, HL098283, HL113933), a Doris Duke  
5 Charitable Foundation Clinical Scientist Development Award, a Burroughs Wellcome Fund Career Award  
6 for Medical Scientists and institutional support from the Massachusetts General Hospital Cardiovascular  
7 Research Center and the Department of Medicine. G.K. was supported by the National Institutes of  
8 Health (T32HL007208). This work was supported by the Novartis Institute for Biomedical Research.

9 DHS and methylation analysis by tissue: CJW received support from the National Institutes of Health  
10 (HL094535 and HL109946), and EMS from the National Science Foundation Open Data Integrative  
11 Graduate Education and Research Traineeship (IGERT) Grant 0903629.

12 DIAGEN: The DIAGEN study was supported by the Commission of the European Communities,  
13 Directorate C - Public Health and Risk Assessment, Health & Consumer Protection, Grant Agreement  
14 number - 2004310 and by the Dresden University of Technology Funding Grant, Med Drive. We are  
15 grateful to all of the patients who cooperated in this study and to their referring physicians and  
16 diabetologists in Saxony.

17 DILGOM: The DILGOM-study was supported by the Academy of Finland, grant # 118065. SM was  
18 supported by grants #136895 and #141005, VS by grants #139635 and 129494 and MP by grant #129322  
19 from the Academy of Finland. KK was supported by Orion-Farmos Research Foundation and Academy of  
20 Finland (grant number 250207). V.S. was supported by the Finnish Foundation for Cardiovascular  
21 Research.

22 DPS: The DPS has been financially supported by grants from the Academy of Finland (117844 and 40758,  
23 211497, and 118590; The EVO funding of the Kuopio University Hospital from Ministry of Health and  
24 Social Affairs (5254), Finnish Funding Agency for Technology and Innovation (40058/07), Nordic Centre  
25 of Excellence on Systems biology in controlled dietary interventions and cohort studies, SYSDIET  
26 (070014), The Finnish Diabetes Research Foundation, Yrjö Jahnsson Foundation (56358), Sigrid Juselius  
27 Foundation, Juho Vainio Foundation and TEKES grants 70103/06 and 40058/07.

28 DR's EXTRA: The DR.s EXTRA Study was supported by grants to R. Rauramaa by the Ministry of Education  
29 and Culture of Finland (627;2004-2011), Academy of Finland (102318; 123885), Kuopio University  
30 Hospital , Finnish Diabetes Association, Finnish Heart Association, Päivikki and Sakari Sohlberg  
31 Foundation and by grants from European Commission FP6 Integrated Project (EXGENESIS); LSHM-CT-  
32 2004-005272, City of Kuopio and Social Insurance Institution of Finland (4/26/2010).

33 DRAGON: This study was supported by the Taichung Veterans General Hospital, Taiwan (TCVGH-  
34 1013001C, TCVGH-1013002D).

35 EchoGen consortium: For a full list of EchoGen members contributing to this work and for  
36 acknowledgements, please see PMID 19584346.

37 Ely: The Ely Study was funded by the Medical Research Council. We are most grateful to all study  
38 participants and to the staff of the St. Mary's Street Surgery, Ely. We thank all the staff who worked on  
39 the study.

40 EPIC: The EPIC Norfolk Study is funded by program grants from the Medical Research Council UK and  
41 Cancer Research UK.

1 eQTL, EGCUT: TE and AM work was supported through the Estonian Genome Center of University of  
2 Tartu by the Targeted Financing from the Estonian Ministry of Science and Education [SF0180142s08];  
3 the Development Fund of the University of Tartu (grant SP1GVARENG); the European Regional  
4 Development Fund to the Centre of Excellence in Genomics (EXCEGEN; grant 3.2.0304.11-0312); and  
5 through FP7 grant 313010.

6 eQTL, Groningen: L.F.,H-J.W.: This study was supported by grants from the Celiac Disease Consortium  
7 (an innovative cluster approved by the Netherlands Genomics Initiative and partly funded by the Dutch  
8 Government (grant BSIK03009), the Netherlands Organization for Scientific Research (NWO-VICI grant  
9 918.66.620, NWO-VENI grant 916.10.135 to L.F.), the Dutch Digestive Disease Foundation (MLDS WO11-  
10 30), and a Horizon Breakthrough grant from the Netherlands Genomics Initiative (grant 92519031 to  
11 L.F.). This project was supported by the Prinses Beatrix Fonds, VSB fonds, H. Kersten and M. Kersten  
12 (Kersten Foundation), The Netherlands ALS Foundation, and J.R. van Dijk and the Adessium Foundation.  
13 The research leading to these results has received funding from the European Community's Health  
14 Seventh Framework Programme (FP7/2007-2013) under grant agreement 259867.

15 FENLAND: The Fenland Study is funded by the Wellcome Trust and the Medical Research Council, as well  
16 as by the Support for Science Funding programme and CamStrad. We are grateful to all the volunteers  
17 for their time and help, and to the General Practitioners and practice staff for help with recruitment. We  
18 thank the Fenland Study co-ordination team and the Field Epidemiology team of the MRC Epidemiology  
19 Unit for recruitment and clinical testing.

20 FHS: The National Heart, Lung, and Blood Institute's Framingham Heart Study is a joint project of the  
21 National Institutes of Health and Boston University School of Medicine and was supported by the  
22 National Heart, Lung, and Blood Institute's Framingham Heart Study (contract No. N01-HC-25195) and  
23 its contract with Affymetrix, Inc. for genotyping services (contract No. N02-HL-6-4278). Analyses reflect  
24 the efforts and resource development from the Framingham Heart Study investigators participating in  
25 the SNP Health Association Resource (SHARe) project. A portion of this research was conducted using  
26 the Linux Cluster for Genetic Analysis (LinGAI) funded by the Robert Dawson Evans Endowment of the  
27 Department of Medicine at Boston University School of Medicine and Boston Medical Center.

28 FIN-D2D 2007: The FIN-D2D study has been financially supported by the hospital districts of Pirkanmaa,  
29 South Ostrobothnia, and Central Finland, the Finnish National Public Health Institute (current National  
30 Institute for Health and Welfare), the Finnish Diabetes Association, the Ministry of Social Affairs and  
31 Health in Finland, the Academy of Finland (grant number 129293), Commission of the European  
32 Communities, Directorate C-Public Health (grant agreement no. 2004310) and Finland's Slottery  
33 Machine Association.

34 FINCAVAS: This work was supported by the Competitive Research Funding of the Tampere University  
35 Hospital (Grant 9M048 and 9N035), the Finnish Cultural Foundation, the Finnish Foundation for  
36 Cardiovascular Research, the Emil Aaltonen Foundation, Finland, and the Tampere Tuberculosis  
37 Foundation. The authors thank the staff of the Department of Clinical Physiology for collecting the  
38 exercise test data.

39 FUSION: Support for FUSION was provided by NIH grants R01-DK062370 (to M.B.), R01-DK072193 (to  
40 K.L.M.), and intramural project number 1Z01-HG000024 (to F.S.C.). Genome-wide genotyping was  
41 conducted by the Johns Hopkins University Genetic Resources Core Facility SNP Center at the Center for  
42 Inherited Disease Research (CIDR), with support from CIDR NIH contract no. N01-HG-65403.

43 GenNet: We thank the study participants and NHLBI for funding (FBPP program).

1 GLACIER: The GLACIER Study is nested within the Northern Sweden Health and Disease Study and  
2 phenotyping was conducted as part of the Västerbotten Intervention Project. We thank the participants  
3 and the investigators from these studies for their valuable contributions, with specific thanks to Lars  
4 Weinehall, Åsa Agren, Kerstin Enquist, and Thore Johansson. The GLACIER Study and part of PWF's salary  
5 were funded by grants from the Swedish Research Council, Swedish Heart-Lung Foundation, Novo  
6 Nordisk, Umeå Medical Research Foundation, and the Swedish Diabetes Association (to PWF).  
7 Genotyping for this specific project was funded by the Wellcome Trust Sanger Institute. Inês Barroso  
8 acknowledges funding from the Wellcome Trust grant 098051, United Kingdom NIHR Cambridge  
9 Biomedical Research Centre and the MRC Centre for Obesity and Related Metabolic Diseases. We would  
10 like to thank Emma Gray, Douglas Simpkin, Sarah Hunt and staff of the WTSI Sample Logistics,  
11 Genotyping and Variation Informatics Facilities. Frida Restrom was supported in part by a post-doctoral  
12 fellowship from the Swedish Heart-Lung Foundation.

13 GoDARTS: The Wellcome Trust provides support for Wellcome Trust United Kingdom Type 2 Diabetes  
14 Case Control Collection (Go-DARTS) and the Scottish Health Informatics Programme. Further informatics  
15 support is provided by the Chief Scientist Office of Scotland. This work was also supported by the UK  
16 Medical Research Council (G0601261). We acknowledge the support of the Health Informatics Centre,  
17 University of Dundee for managing and supplying the anonymised data and NHS Tayside, the original  
18 data owner. We are grateful to all the participants who took part in the Go-DARTS study, to the general  
19 practitioners, to the Scottish School of Primary Care for their help in recruiting the participants, and to  
20 the whole team, which includes interviewers, computer and laboratory technicians, clerical workers,  
21 research scientists, volunteers, managers, receptionists, and nurses.

22 GOSH: This work was supported by grants from the US National Institutes of Health (AG028555,  
23 AG08724, AG04563, AG10175, AG08861), the Swedish Research Council, the Swedish Heart-Lung  
24 Foundation, the Swedish Foundation for Strategic Research, the Royal Swedish Academy of Science, and  
25 ENGAGE (within the European Union Seventh Framework Programme, HEALTH-F4-2007-201413).  
26 Genotyping was performed by the SNP&SEQ Technology Platform in Uppsala ([www.genotyping.se](http://www.genotyping.se)). We  
27 thank Tomas Axelsson, Ann-Christine Wiman and Caisa Pöntinen for their excellent assistance with  
28 genotyping. The SNP Technology Platform is supported by Uppsala University, Uppsala University  
29 Hospital and the Swedish Research Council for Infrastructures.

30 GxE/Spanish Town: Principally, our thanks go to the participants in the Spanish Town and GxE studies.  
31 We also thank Nurse Orgen Brown, Mr Windsor Cuffe, and other past and present members of the labs  
32 at TMRU for their assistance in carrying out these studies. This work was supported by NIH Grant  
33 R01HL53353.

34 HALST: HALST project are conducted and supported by the National Health Research Institutes (NHRI) in  
35 collaboration with HALST investigators. Support is provided by grant BS-097-SP-04, PH-098-PS-02, PH-  
36 099-SP-01, PH-100-SP-01, PH-101-SP-01, PH-102-SP-01, PH-103-SP-01. The authors thank the  
37 participants of the HALST study, the Coordinating Center, HALST investigators, and study staff for their  
38 valuable contributions.

39 HEXA: This work was supported by a grant from the Korea Center for Disease Control and Prevention,  
40 and intramural grant from the Korea National Institute of Health.

41 HUNT2: The Nord-Trøndelag Health Study (The HUNT Study) is a collaboration between HUNT Research  
42 Centre (Faculty of Medicine, Norwegian University of Science and Technology NTNU), Nord-Trøndelag  
43 County Council, Central Norway Health Authority, and the Norwegian Institute of Public Health.

1 HyperGEN: The hypertension network is funded by cooperative agreements (U10) with NHLBI: HL54471,  
2 HL54472, HL54473, HL54495, HL54496, HL54497, HL54509, HL54515, and 2 R01 HL55673-12. The study  
3 involves: University of Utah: (Network Coordinating Center, Field Center, and Molecular Genetics Lab);  
4 Univ. of Alabama at Birmingham: (Field Center and Echo Coordinating and Analysis Center); Medical  
5 College of Wisconsin: (Echo Genotyping Lab); Boston University: (Field Center); University of Minnesota:  
6 (Field Center and Biochemistry Lab); University of North Carolina: (Field Center); Washington University:  
7 (Data Coordinating Center); Weill Cornell Medical College: (Echo Reading Center); National Heart, Lung,  
8 & Blood Institute. For a complete list of HyperGEN Investigators:  
9 <http://www.biostat.wustl.edu/hypergen/Acknowledge.html>.

10 IMPROVE: The IMPROVE study was funded by the European Commission (Contract number: QLG1-CT-  
11 2002-00896), the Academy of Finland (Grant #110413) the British Heart Foundation (RG2008/014) and  
12 the Italian Ministry of Health (Ricerca Corrente), and the IMPROVE and SCARFSHEEP studies were  
13 funded by the Swedish Heart-Lung Foundation, the Swedish Research Council (8691), the Knut and Alice  
14 Wallenberg Foundation, the Foundation for Strategic Research, the Torsten and Ragnar Söderberg  
15 Foundation, the Strategic Cardiovascular and Diabetes Programmes of Karolinska Institutet and the  
16 Stockholm County Council, the Strategic support for epidemiological research at Karolinska Institutet  
17 and the Stockholm County Council, and the Stockholm County Council (560183).

18 InCHIANTI: The InCHIANTI study baseline (1998-2000) was supported as a "targeted project"  
19 (ICS110.1/RF97.71) by the Italian Ministry of Health and in part by the U.S. National Institute on Aging  
20 (Contracts: 263 MD 9164 and 263 MD 821336).

21 JUPITER: Genetic Analysis in the JUPITER trial was funded by AstraZeneca

22 KidneyGen Consortium: The KidneyGen Consortium included 23,812 participants from the following  
23 cohort studies: BRIGHT, BWHHS, CoLaus, Fenland, InChianti, LOLIPOP, MDC-CC, NESDA, NFBC 1966,  
24 PREVEND, SardiNIA, and Twins UK. The acknowledgements and funding sources for each cohort can be  
25 found in Chambers JC, et al. Nat Genet 2010, 42:373-375 (PMID: 20383145). JCC, JSK and WZ  
26 acknowledge support from the National Institute for Health Research (NIHR) Comprehensive Biomedical  
27 Research Centre (BRC) Imperial College Healthcare NHS Trust, the British Heart Foundation (SP/04/002),  
28 the Medical Research Council (G0601966,G0700931), the Wellcome Trust (084723/Z/08/Z) the NIHR  
29 (RP-PG-0407-10371), European Union FP7 (EpiMigrant, 279143) and Action on Hearing Loss (G51). We  
30 thank all the participants and researchers in the consortium who made the study possible. P. Elliott is  
31 supported by the National Institute for Health Research (NIHR) Imperial College Health Care NHS Trust  
32 and Imperial College Biomedical Research Centre, the MRC-PHE Centre for Environment and Health, the  
33 NIHR Health Protection Research Unit on Health Impact of Environmental Hazards and is an NIHR Senior  
34 Investigator.

35 KORA F3/F4: The KORA Augsburg studies were financed by the Helmholtz Zentrum München, German  
36 Research Center for Environmental Health, Neuherberg, Germany and supported by grants from the  
37 German Federal Ministry of Education and Research (BMBF). Part of this work was financed by the  
38 German National Genome Research Network (NGFN). Our research was supported within the Munich  
39 Center of Health Sciences (MC Health) as part of LMUinnovativ.

40 LURIC: We extend our appreciation to the participants of the LURIC study. We thank the LURIC study  
41 team who were either temporarily or permanently involved in patient recruitment as well as sample and  
42 data handling, in addition to the laboratory staff at the Ludwigshafen General Hospital and the  
43 Universities of Freiburg and Ulm, Germany. This work was supported by the 7th Framework Program  
44 (integrated project AtheroRemo, grant agreement number 201668 and RiskyCAD, grant agreement

1 number 305739) of the European Union, by the INTERREG IV Oberrhein Program (Project A28, Genetic  
2 mechanisms of cardiovascular diseases) with support from the European Regional Development Fund  
3 (ERDF) and the Wissenschaftsoffensive TMO.

4 MDC-CVA: The authors acknowledge the Knut and Alice Wallenberg Foundation for its economic  
5 support of the SWEGENE DNA extraction facility. Source of funding: This study was supported by grants  
6 from the European Research Council (StG-282255) Swedish Medical Research Council, the Swedish  
7 Heart and Lung Foundation, the Medical Faculty of Lund University, Malmö University Hospital, the  
8 Albert Pålsson Research Foundation, the Crafoord Foundation, the Ernhold Lundström Research  
9 Foundation, the Region Skane, Hulda and Conrad Mossfelt Foundation, King Gustaf V and Queen  
10 Victoria Foundation and the Lennart Hansson Memorial Fund.

11 MESA: MESA and the MESA SHARe project are conducted and supported by the National Heart, Lung,  
12 and Blood Institute (NHLBI) in collaboration with MESA investigators. Support is provided by grants and  
13 contracts N01 HC-95159, N01-HC-95160, N01-HC-95161, N01-HC-95162, N01-HC-95163, N01-HC-95164,  
14 N01-HC-95165, N01-HC-95166, N01-HC-95167, N01-HC-95168, N01-HC-95169, RR-024156 and H7  
15 071025 and RR 025005. Funding for MESA SHARe genotyping was provided by NHLBI contract H2-6-  
16 4278. The provision of genotyping data was supported in part by the National Center for Advancing  
17 Translational Sciences, CTSI grant UL1TR000124, and the National Institute of Diabetes and Digestive  
18 and Kidney Disease Diabetes Research Center (DRC) grant DK063491 to the Southern California Diabetes  
19 Endocrinology Research Center. The authors thank the participants of the MESA study, the Coordinating  
20 Center, MESA investigators, and study staff for their valuable contributions. A full list of participating  
21 MESA investigators and institutions can be found at <http://www.mesa-nhlbi.org>.

22 Metastroke: H.S.M. is supported by a National Institute for Health Research Senior Investigator award.  
23 H.S.M. and S.B. are supported by the Cambridge University Hospital National Institute for Health  
24 Research Biomedical Research Centre. Hugh Markus is supported by an NIHR Senior Investigator award  
25 and received support from the Cambridge Universities Trust NIHR Comprehensive BRC.

26 METSIM: The METSIM study was funded by the Academy of Finland (grants no. 77299 and 124243).

27 MICROS: In South Tyrol, the study was supported by the Ministry of Health and Department of  
28 Educational Assistance, University and Research of the Autonomous Province of Bolzano, the South  
29 Tyrolean Sparkasse Foundation, and the European Union framework program 6 EUROSPAN project  
30 (contract no. LSHG-CT-2006-018947). For the MICROS study, we thank the primary care practitioners  
31 Raffaella Stocker, Stefan Waldner, Toni Pizzecco, Josef Plangger, Ugo Marcadent, and the personnel of  
32 the Hospital of Silandro (Department of Laboratory Medicine) for their participation and collaboration in  
33 the research project.

34 MIGen: The MIGen study was funded by the US National Institutes of Health (NIH) and National Heart,  
35 Lung, and Blood Institute's STAMPEED genomics research program. Genotyping was partially funded by  
36 The Broad Institute Center for Genotyping and Analysis, which is supported by grant U54 RR020278  
37 from the National Center for Research Resources. Specific cohorts were supported by the grants  
38 (R01HL056931, P30ES007033) and a contract (N01HD013107) from US National Institutes of Health  
39 (HARPS); and by the Spanish Ministry of Economy and Innovation through the Carlos III Health Institute  
40 [Red HERACLES RD12/0042, CIBER Epidemiología y Salud Pública, PI09/90506], European Funds for  
41 Development (ERDF-FEDER), and by the Catalan Research and Technology Innovation Interdepartmental  
42 Commission [SGR 1195] (REGICOR).

1 MORGAM: Sites and key personnel of contributing MORGAM Centres: Finland FINRISK, National  
2 Institute for Health and Welfare, Helsinki: V. Salomaa (principal investigator), A. Juolevi, E. Vartiainen, P.  
3 Jousilahti; ATBC, National Institute for Health and Welfare, Helsinki: J. Virtamo (principal investigator), H.  
4 Kilpeläinen; MORGAM Data Centre, National Institute for Health and Welfare, Helsinki: K. Kuulasmaa  
5 (responsible person), Z. Cepaitis, A. Haukijärvi, B. Joseph, J. Karvanen, S. Kulathinal, M. Niemelä, O.  
6 Saarela; MORGAM Central Laboratory, National Institute for Health and Welfare, Helsinki: L. Peltonen  
7 (responsible person), M. Perola, K. Silander, M. Alanne, P. Laiho, K. Kristiansson, K. Ahonen; France  
8 National Coordinating Centre, National Institute of Health and Medical Research (U258), Paris: P.  
9 Ducimetière (national coordinator), A. Bingham; PRIME/Strasbourg, Department of Epidemiology and  
10 Public Health, EA 3430, Faculty of Medicine, University of Strasbourg, Strasbourg: D. Arveiler (principal  
11 investigator), B. Haas, A. Wagner; PRIME/Toulouse, Department of Epidemiology, Toulouse University  
12 School of Medicine, Toulouse: J. Ferrières (Principal Investigator), J-B. Ruidavets, V. Bongard, D. Deckers,  
13 C. Saulet, S. Barrere; PRIME/Lille, Department of Epidemiology and Public Health, INSERM U744-  
14 Université Lille Nord de France – Institut Pasteur de Lille: P. Amouyel (principal investigator), M.  
15 Montaye, B. Lemaire, S. Beauchant, D. Cottel, C. Graux, N. Marecaux, C. Steclebout, S. Szeremeta;  
16 MORGAM Laboratory, INSERM U937, Paris: F. Cambien (responsible person), L. Tiret, V. Nicaud; Italy  
17 Brianza, Research Centre for Epidemiology and Preventive Medicine (EPIMED), Department of Clinical  
18 and Experimental Medicine, University of Insubria at Varese: M.M. Ferrario (principal investigator), G.  
19 Veronesi, F. Gianfagna, G. Cesana; Italy Brianza Laboratory, Department of Laboratory Medicine, Desio  
20 Hospital, University Milano-Bicocca, Milano: P. Brambilla (responsible person), S. Signorini; United  
21 Kingdom PRIME/Belfast, Queen's University Belfast, Belfast, Northern Ireland: F. Kee (principal  
22 investigator) A. Evans (former principal investigator), J. Yarnell, E. Gardner; MORGAM Coordinating  
23 Centre, Queen's University Belfast, Belfast, Northern Ireland: A. Evans (MORGAM coordinator), S.  
24 Cashman, F Kee; MORGAM Management Group: A. Evans (chair, Belfast, UK), S. Blankenberg (Hamburg,  
25 Germany), F. Cambien (Paris, France), M. Ferrario (Varese, Italy), K. Kuulasmaa (Helsinki, Finland), A.  
26 Palotie (Cambridge, UK), M. Perola (Helsinki, Finland), A. Peters (Neuherberg, Germany), V. Salomaa  
27 (Helsinki, Finland), H. Tunstall-Pedoe (Dundee, Scotland), P.G. Wiklund (Umeå, Sweden); Previous  
28 members: K. Asplund (Stockholm, Sweden), L. Peltonen (Helsinki, Finland), D. Shields (Dublin, Ireland),  
29 B. Stegmayr (Umeå, Sweden).

30 MRC NSHD: This work was funded by the Medical Research Council [MC\_UU\_12019/1]. We are very  
31 grateful to the members of this birth cohort for their continuing interest and participation in the study.

32 MuTHER eQTL: The MuTHER Study was funded by a program grant from the Wellcome Trust  
33 (081917/Z/07/Z).

34 NESDA: The infrastructure for the NESDA study is funded through the Geestkracht programme of the  
35 Dutch Scientific Organization (ZON-MW, grant number 10-000-1002) and matching funds from  
36 participating universities and mental health care organizations. Genotyping in NESDA was funded by the  
37 Genetic Association Information Network (GAIN) of the Foundation for the US National Institutes of  
38 Health. Statistical analyses were carried out on the Genetic Cluster Computer  
39 (<http://www.geneticcluster.org>), which is financially supported by the Netherlands Scientific  
40 Organization (NWO 480-05-003) along with a supplement from the Dutch Brain Foundation.

41 NESDA eQTL: The Netherlands Study of Depression and Anxiety (NESDA) and the Netherlands Twin  
42 Register (NTR) were funded by the Netherlands Organization for Scientific Research (MagW/ZonMW;  
43 grants 904-61-090, 985-10-002, 904-61-193, 480-04-004, 400-05-717 and 912-100-20; Spinozapremie  
44 56-464-14192; and Geestkracht program grant 10-000-1002), the Center for Medical Systems Biology  
45 (CMSB2; NWO Genomics), Biobanking and Biomolecular Resources Research Infrastructure (BBMRI-NL),  
46 the VU University EMGO+ Institute for Health and Care Research and the Neuroscience Campus

1 Amsterdam, NBIC/BioAssist/RK (2008.024), the European Science Foundation (EU/QLRT-2001-01254),  
2 the European Community's Seventh Framework Programme (FP7/2007-2013), ENGAGE (HEALTH-F4-  
3 2007-201413) and the European Research Council (ERC; 230374). Gene-expression data was funded by  
4 the US National Institute of Mental Health (RC2 MH089951) as part of the American Recovery and  
5 Reinvestment Act of 2009.

6 NeuroCHARGE: The Atherosclerosis Risk in Communities Study (ARIC) is carried out as a collaborative  
7 study supported by National Heart, Lung, and Blood Institute contracts (HHSN268201100005C,  
8 HHSN268201100006C, HHSN268201100007C, HHSN268201100008C, HHSN268201100009C,  
9 HHSN268201100010C, HHSN268201100011C, and HHSN268201100012C), R01HL087641, R01HL59367  
10 and R01HL086694; National Human Genome Research Institute contract U01HG004402; National  
11 Institutes of Health contract HHSN268200625226C and NHLBI contracts N01-HC-55015, N01-HC-55016,  
12 N01-HC-55018, N01-HC-55019, N01-HC-55020, N01-HC-55021, N01-HC-55022, and grants R01-  
13 HL087641, U01 HL096917 (Mosley). Infrastructure was partly supported by Grant Number  
14 UL1RR025005, a component of the National Institutes of Health and NIH Roadmap for Medical  
15 Research. ARIC analyses performed as part of this project were supported by NIH grant HL093029 to M.  
16 Fornage. Dr. Ikram was funded through the Netherlands Heart Foundation (2009B102)

17 NFBC1966: NFBC1966 and NFBC1986 received financial support from the Academy of Finland (project  
18 grants 104781, 120315, 129269, 1114194, 24300796, Center of Excellence in Complex Disease Genetics  
19 and SALVE), University Hospital Oulu, Biocenter, University of Oulu, Finland (75617), NHLBI grant  
20 5R01HL087679-02 through the STAMPEED program (1RL1MH083268-01), NIH/NIMH  
21 (5R01MH63706:02), ENGAGE project and grant agreement HEALTH-F4-2007-201413, EU FP7  
22 EurHEALTHAgeing -277849, the Medical Research Council, UK (G0500539, G0600705, G1002319,  
23 PrevMetSyn/SALVE) and the MRC, Centenary Early Career Award. The DNA extractions, sample quality  
24 controls, biobank up-keeping and aliquotting was performed in the National Public Health Institute,  
25 Biomedicum Helsinki, Finland and supported financially by the Academy of Finland and Biocentrum  
26 Helsinki. We thank the late Professor Paula Rantakallio (launch of NFBCs), and Ms Outi Tornwall and Ms  
27 Minttu Jussila (DNA biobanking). The authors would like to acknowledge the contribution of the late  
28 Academician of Science Leena Peltonen.

29 NFBC1986: NFBC1966 and NFBC1986 received financial support from the Academy of Finland (project  
30 grants 104781, 120315, 129269, 1114194, 24300796, Center of Excellence in Complex Disease Genetics  
31 and SALVE), University Hospital Oulu, Biocenter, University of Oulu, Finland (75617), NHLBI grant  
32 5R01HL087679-02 through the STAMPEED program (1RL1MH083268-01), NIH/NIMH  
33 (5R01MH63706:02), ENGAGE project and grant agreement HEALTH-F4-2007-201413, EU FP7  
34 EurHEALTHAgeing -277849, the Medical Research Council, UK (G0500539, G0600705, G1002319,  
35 PrevMetSyn/SALVE) and the MRC, Centenary Early Career Award. The DNA extractions, sample quality  
36 controls, biobank up-keeping and aliquotting was performed in the National Public Health Institute,  
37 Biomedicum Helsinki, Finland and supported financially by the Academy of Finland and Biocentrum  
38 Helsinki. We thank the late Professor Paula Rantakallio (launch of NFBCs), and Ms Outi Tornwall and Ms  
39 Minttu Jussila (DNA biobanking). The authors would like to acknowledge the contribution of the late  
40 Academician of Science Leena Peltonen. SS and MRJ received support for their research from the  
41 European Union under grant agreement EU H2020-PHC-2014; 633595 for the DynaHEALTH  
42 action.

43 NSPHS: The Northern Swedish Population Health Study (NSPHS) was funded by the Swedish Medical  
44 Research Council (Project Number K2007-66X-20270-01-3, and 2011-2354), the Foundation for Strategic  
45 Research (SSF). NSPHS as part of EUROSPAN (European Special Populations Research Network) was also

1 supported by European Commission FP6 STRP grant number 01947 (LSHG-CT-2006-01947). This work  
2 has also been supported by the Swedish Society for Medical Research (SSMF).

3 ORCADES: ORCADES was supported by the Chief Scientist Office of the Scottish Government, the Royal  
4 Society, the MRC Human Genetics Unit, Arthritis Research UK and the European Union framework  
5 program 6 EUROSPAN project (contract no. LSHG-CT-2006-018947). DNA extractions were performed at  
6 the Wellcome Trust Clinical Research Facility in Edinburgh. We would like to acknowledge the invaluable  
7 contributions of Lorraine Anderson and the research nurses in Orkney, the administrative team in  
8 Edinburgh and the people of Orkney.

9 PARC: This work was funded by National Institutes of Health grant U01 HL69757. DNA handling and  
10 genotyping was supported in part by CTSI grant UL1TR000124 from the National Center for Advancing  
11 Translational Sciences; in addition to the National Institute of Diabetes and Digestive and Kidney Disease  
12 grant DK063491 to the Southern California Diabetes Endocrinology Research Center.

13 PIVUS: PIVUS has been supported by AstraZeneca, FORMAS, the Swedish Research Council, the Swedish  
14 Heart-Lung Foundation, and Uppsala University Hospital.

15 PROCARDIS: PROCARDIS was supported by the European Community Sixth Framework Program (LSHM-  
16 CT- 2007-037273), AstraZeneca, the British Heart Foundation, the Swedish Research Council, the Knut  
17 and Alice Wallenberg Foundation, the Swedish Heart-Lung Foundation, the Torsten and Ragnar  
18 Söderberg Foundation, the Strategic Cardiovascular Program of Karolinska Institutet and Stockholm  
19 County Council, the Foundation for Strategic Research and the Stockholm County Council (560283). M.F  
20 acknowledges the support of the Wellcome Trust core award (090532/Z/09/Z) and the BHF Centre of  
21 Research Excellence.

22 PROMIS: Genotyping in PROMIS was funded by the Wellcome Trust, UK and Pfizer. Biomarker assays in  
23 PROMIS have been funded through grants awarded by the NIH (RC2HL101834 and RC1TW008485) and  
24 the Fogarty International (RC1TW008485). Field-work, genotyping, and standard clinical chemistry  
25 assays in PROMIS were principally supported by grants awarded to the University of Cambridge from the  
26 British Heart Foundation, UK Medical Research Council, Wellcome Trust, EU Framework 6–funded  
27 Bloodomics Integrated Project, Pfizer, Novartis, and Merck. The founders of the Unit are: UK Medical  
28 Research Council, British Heart Foundation, the British Heart Foundation Cambridge Cardiovascular  
29 Centre of Excellence, UK National Institute for Health Research Cambridge Biomedical Research Centre,  
30 European Research Council, and European Commission Framework Programme 7. The Emerging Risk  
31 Factor Collaboration’s website <http://www.phpc.cam.ac.uk/ceu/research/erfc/studies/> has a compiled  
32 list of some of the funders of the component studies in this analysis. We also acknowledge the  
33 contributions made by the following: Philippe Frossard, Ayeesha Kamal, Mohammad Zeeshan Ozair,  
34 Usman Ahmed, Abdul Hakeem, Hamza Khalid, Kamran Shahid, Fahad Shuja, Ali Kazmi, Mustafa Qadir  
35 Hameed, Naeem Khan, Sadiq Khan, Ayaz Ali, Madad Ali, Saeed Ahmed, Muhammad Waqar Khan,  
36 Muhammad Razaq Khan, Abdul Ghafoor, Mir Alam, Riazuddin, Muhammad Irshad Javed, Abdul Ghaffar,  
37 Tanveer Baig Mirza, Muhammad Shahid, Jabir Furqan, Muhammad Iqbal Abbasi, Tanveer Abbas, Rana  
38 Zulfiqar, Muhammad Wajid, Irfan Ali, Muhammad Ikhlq, Danish Sheikh and Muhammad Imran. J  
39 Danesh is a British Heart Foundation Professor, European Research Council Senior Investigator, and  
40 NIHR Senior Investigator.

41 public eSNP and methylation: ADJ and JDE were supported by National Heart, Lung and Blood Institute  
42 Division of Intramural Research funds.



1 RACe: The RACE study has been funded by the National Institute of Neurological Disorders  
2 (R21NS064908), the Fogarty International (R21NS064908) and the Center for Non-Communicable  
3 Diseases, Karachi, Pakistan. We also acknowledge the contributions made by the following: Philippe  
4 Frossard, Ayesha Kamal, Mohammad Zeeshan Ozair, Usman Ahmed, Abdul Hakeem, Hamza Khalid,  
5 Kamran Shahid, Fahad Shuja, Ali Kazmi, Mustafa Qadir Hameed, Naeem Khan, Sadiq Khan, Ayaz Ali,  
6 Madad Ali, Saeed Ahmed, Muhammad Waqar Khan, Muhammad Razaq Khan, Abdul Ghafoor, Mir Alam,  
7 Riazuddin, Muhammad Irshad Javed, Abdul Ghaffar, Tanveer Baig Mirza, Muhammad Shahid, Jabir  
8 Furqan, Muhammad Iqbal Abbasi, Tanveer Abbas, Rana Zulfiqar, Muhammad Wajid, Irfan Ali,  
9 Muhammad Ikhtlaq, Danish Sheikh and Muhammad Imran.

10 Rotterdam study: The Rotterdam Study is supported by the Erasmus Medical Center and Erasmus  
11 University Rotterdam; the Netherlands Organization for Scientific Research; the Netherlands  
12 Organization for Health Research and Development (ZonMw); the Research Institute for Diseases in the  
13 Elderly; The Netherlands Heart Foundation; the Ministry of Education, Culture and Science; the Ministry  
14 of Health Welfare and Sports; the European Commission; and the Municipality of Rotterdam. Support  
15 for genotyping was provided by the Netherlands Organization for Scientific Research (NWO Groot,  
16 175.010.2005.011, 911.03.012) and Research Institute for Diseases in the Elderly (014.93.015; RIDE2).  
17 This study was supported by the Netherlands Genomics Initiative (NGI)/Netherlands Organisation for  
18 Scientific Research (NWO) project nr. 050-060-810. We thank Pascal Arp, Mila Jhamai, Michael  
19 Moorhouse, Marijn Verkerk and Sander Bervoets for their help in creating the database and Maxim  
20 Struchalin for his contributions to the imputations of the data. Further financial support was obtained  
21 from the Netherlands Heart Foundation nr. 2009B102.

22 SardiNIA: The SardiNIA (“ProgeNIA”) team was supported by Contract NO1-AG-1-2109 from the National  
23 Institute on Aging. This work was supported, in part, by the Intramural Research Program of the National  
24 Institute on Aging, National Institutes of Health. We thank Monsignore Piseddu, Bishop of Ogliastro; the  
25 Mayors of Lanusei, Ilbono, Arzana, and Elini; the head of the local Public Health Unit ASL4; and the  
26 residents of the towns for volunteering and cooperation. In addition, we are grateful to the Mayor and  
27 the administration in Lanusei for providing and furnishing the clinic site. We thank the team of  
28 physicians and nurses, who carried out the physical examinations and the recruitment personnel who  
29 enrolled the volunteers.

30 SCARFSHEEP: The IMPROVE study was funded by the European Commission (Contract number: QLG1-  
31 CT-2002-00896), the Academy of Finland (Grant #110413) the British Heart Foundation (RG2008/014)  
32 and the Italian Ministry of Health (Ricerca Corrente), and the IMPROVE and SCARFSHEEP studies were  
33 funded by the Swedish Heart-Lung Foundation, the Swedish Research Council (8691), the Knut and Alice  
34 Wallenberg Foundation, the Foundation for Strategic Research, the Torsten and Ragnar Söderberg  
35 Foundation, the Strategic Cardiovascular and Diabetes Programmes of Karolinska Institutet and the  
36 Stockholm County Council, the Strategic support for epidemiological research at Karolinska Institutet  
37 and the Stockholm County Council, and the Stockholm County Council (560183).

38 SEED: The Singapore Epidemiology of Eye Diseases (SEED) Study includes the Singapore Chinese Eye  
39 Study (SCES), Singapore Malay Eye Study (SiMES) and Singapore Indian Eye Study (SINDI). They  
40 supported by the National Medical Research Council (NMRC), Singapore (grants 0796/2003,  
41 IRG07nov013, IRG09nov014, NMRC 1176/2008, STaR/0003/2008, CG/SERI/2010), and Biomedical  
42 Research Council (BMRC), Singapore (08/1/35/19/550 and 09/1/35/19/616). Ching-Yu Cheng is  
43 supported by an award from NMRC (CSA/033/2012). The Singapore Tissue Network and the Genome  
44 Institute of Singapore, Agency for Science, Technology and Research, Singapore provided services for  
45 tissue archival and genotyping, respectively.

1 SEED: The Singapore Epidemiology of Eye Diseases (SEED) Study includes the Singapore Chinese Eye  
2 Study (SCES), Singapore Malay Eye Study (SiMES) and Singapore Indian Eye Study (SINDI). They  
3 supported by the National Medical Research Council (NMRC), Singapore (grants 0796/2003,  
4 IRG07nov013, IRG09nov014, NMRC 1176/2008, STaR/0003/2008, CG/SERI/2010), and Biomedical  
5 Research Council (BMRC), Singapore (08/1/35/19/550 and 09/1/35/19/616). Ching-Yu Cheng is  
6 supported by an award from NMRC (CSA/033/2012). The Singapore Tissue Network and the Genome  
7 Institute of Singapore, Agency for Science, Technology and Research, Singapore provided services for  
8 tissue archival and genotyping, respectively.

9 SEY: The TANDEM and SEY studies were supported by the SNF grant 31–51115.97 and by the Fondation  
10 pour Recherches Médicales, Geneve. We thank the Ministry of Health of the Seychelles and the  
11 participants of the studies for their valuable contributions.

12 SHIP: SHIP was funded by grants from the German Federal Ministry of Education and Research (BMBF,  
13 Grants 01ZZ0403, 01ZZ0103, 01GI0883), the Ministry for Education, Research and Cultural Affairs as well  
14 as the Ministry of Social Affairs of the Federal State of Mecklenburg-West Pomerania. Genome-wide  
15 data have been supported by the Federal Ministry of Education and Research (grant no. 03ZIK012) and a  
16 joint grant from Siemens Healthcare, Erlangen, Germany and the Federal State of Mecklenburg- West  
17 Pomerania. The University of Greifswald is a member of the ‘Center of Knowledge Interchange’ program  
18 of the Siemens AG.

19 SU.VI.MAX: This study was funded by the Association Robert Debré pour la Recherche Médicale, the  
20 Institut National pour la Santé et la Recherche Médicale, the Conservatoire National des Arts et Métiers,  
21 the Institut National de la Recherche Agronomique and the Université Paris 13.

22 TANDEM: The TANDEM and SEY studies were supported by the SNF grant 31–51115.97 and by the  
23 Fondation pour Recherches Médicales, Geneve. We thank the Ministry of Health of the Seychelles and  
24 the participants of the studies for their valuable contributions.

25 THISEAS: The Hellenic study of Interactions between SNPs and Eating in Atherosclerosis Susceptibility  
26 (THISEAS) study thanks the Genotyping Facility at the Wellcome Trust Sanger Institute for typing the  
27 THISEAS samples. Prof Deloukas' work forms part of the research themes contributing to the  
28 translational research portfolio of Barts Cardiovascular Biomedical Research Unit which is supported and  
29 funded by the National Institute for Health Research.

30 Tromsø: University of Tromsø, Norwegian Research Council (project number 185764)

31 TUDR: This study was supported by the National Eye Institute of the National Institutes of Health  
32 (EY014684 to J.I.R., DK079888 to M.O.G.) and ARRA Supplement (EY014684-03S1, -04S1), the National  
33 Institute of Diabetes and Digestive and Kidney Disease grant DK063491 to the Southern California  
34 Diabetes Endocrinology Research Center, the Eye Birth Defects Foundation Inc., the National Science  
35 Council, Taiwan (NSC 98-2314-B-075A-002-MY3 to W.H.S.) and the Taichung Veterans General Hospital,  
36 Taichung, Taiwan (TCVGH-1003001C to W.H.S.). DNA handling and genotyping at Cedars-Sinai Medical  
37 Center were supported in part by the National Center for Research Resources, grant UL1RR033176, and  
38 is now at the National Center for Advancing Translational Sciences, CTSI grant UL1TR000124.

39 TWINSUK: The study was funded by the Wellcome Trust; European Community's Seventh Framework  
40 Programme (FP7/2007-2013). The study also receives support from the National Institute for Health  
41 Research (NIHR)- funded BioResource, Clinical Research Facility and Biomedical Research Centre based  
42 at Guy's and St Thomas' NHS Foundation Trust in partnership with King's College London. SNP

1 Genotyping was performed by The Wellcome Trust Sanger Institute and National Eye Institute via  
2 NIH/CIDR.

3 UK CardioMetabolic Consortium: This research has been conducted using the UK Biobank Resource.  
4 Mike Barnes, Claudia Cabrera & Helen R Warren are supported by the NIHR Cardiovascular Biomedical  
5 Research Unit at Barts. He Gao is supported by the NIHR Imperial College Health Care NHS Trust and  
6 Imperial College London Biomedical Research Centre.

7 ULSAM: ULSAM has been supported by the Swedish Research Council, the Swedish Heart-Lung  
8 Foundation, Uppsala University Hospital, the Foundation for Geriatric Research, and the Geriatric Fund.

9 VIS (EUROSPAN): The CROATIA-Vis study in the Croatian island of Vis was supported through the grants  
10 from the Medical Research Council UK and Ministry of Science, Education and Sport of the Republic of  
11 Croatia. (number 108-1080315-0302) and the European Union framework program 6 EUROSPAN project  
12 (contract no. LSHG-CT-2006-018947). We would like to acknowledge the invaluable contributions of the  
13 recruitment team (including those from the Institute of Anthropological Research in Zagreb) in Vis, the  
14 administrative teams in Croatia and Edinburgh and the people of Vis.

15 WGHS: The WGHS is supported by HL043851 and HL080467 from the National Heart, Lung, and Blood  
16 Institute and CA047988 from the National Cancer Institute with collaborative scientific support and  
17 funding for genotyping provided by Amgen.

18 Whitehall II: The Whitehall II study has been supported by grants from the Medical Research Council;  
19 Economic and Social Research Council; BHF; Health and Safety Executive; Department of Health;  
20 National Heart Lung and Blood Institute (HL36310), US, NIH: National Institute on Aging (AG13196), US,  
21 NIH; Agency for Health Care Policy Research (HS06516); and the John D and Catherine T MacArthur  
22 Foundation Research Networks on Successful Midlife Development and Socio-economic Status and  
23 Health. Whitehall II genotyping was in part supported by a MRC-GSK pilot programme grant (ID 85374).

## 24 **17 Members of consortia**

### 25 **CHARGE-EchoGen Consortium**

26 Ramachandran S. Vasan, MD,<sup>1</sup> Nicole L. Glazer, PhD,<sup>2</sup> Janine F. Felix, MD, PhD,<sup>3</sup> Wolfgang Lieb,<sup>4</sup> MD,  
27 Philipp S. Wild, MD,<sup>5</sup> Stephan B. Felix, MD,<sup>6</sup> Norbert Watzinger, MD,<sup>7</sup> Martin G. Larson ScD,<sup>1</sup> Nicholas L.  
28 Smith, PhD,<sup>2</sup> Abbas Dehghan, MD, DSc,<sup>3</sup> Anika Großhennig, PhD,<sup>4</sup> Arne Schillert, PhD,<sup>5</sup> Alexander  
29 Teumer,<sup>6</sup> Reinhold Schmidt, MD,<sup>7</sup> Sekar Kathiresan<sup>1</sup>, MD, Thomas Lumley, PhD,<sup>2</sup> Yurii S. Aulchenko,  
30 PhD,<sup>3</sup> Inke R. König, PhD,<sup>4</sup> Tanja Zeller, PhD,<sup>5</sup> Georg Homuth, PhD,<sup>6</sup> Maksim Struchalin,<sup>3</sup> Jayashri  
31 Aragam<sup>1</sup>, MD, Joshua C. Bis, PhD,<sup>2</sup> Fernando Rivadeneira, MD, PhD,<sup>3</sup> Jeanette Erdmann, PhD,<sup>4</sup> Renate B.  
32 Schnabel, MD,<sup>5</sup> Marcus Dörr, MD,<sup>6</sup> Robert Zweiker, MD,<sup>7</sup> Lars Lind, MD, PhD,<sup>8</sup> Richard J. Rodeheffer,  
33 MD,<sup>9</sup> Karin Halina Greiser, MD,<sup>10</sup> Daniel Levy<sup>1,11</sup>, MD, Talin Haritunians, PhD,<sup>2</sup> Jaap W. Deckers, MD,  
34 PhD,<sup>3</sup> Jan Stritzke, MD,<sup>4</sup> Karl J Lackner, PhD,<sup>5</sup> Uwe Völker, PhD,<sup>6</sup> Erik Ingelsson, MD, PhD,<sup>8</sup> Iftikhar Kullo,  
35 MD,<sup>9</sup> Johannes Haerting, PhD,<sup>10</sup> Christopher J. O'Donnell,<sup>1</sup> MD, Susan R. Heckbert, MD, PhD,<sup>2</sup> Bruno H.  
36 Stricker, MB, PhD,<sup>3</sup> Andreas Ziegler, PhD,<sup>5</sup> Thorsten Reffelmann, MD,<sup>6</sup> Margaret M. Redfield, MD,<sup>9</sup> Karl  
37 Werdan, MD,<sup>10</sup> Gary F. Mitchell, MD,<sup>1</sup> Kenneth Rice, PhD,<sup>2</sup> Donna Arnett, PhD,<sup>2</sup> Albert Hofman, MD,  
38 PhD,<sup>3</sup> John S. Gottdiener, MD,<sup>2</sup> Andre G. Uitterlinden, PhD,<sup>3</sup> Thomas Meitinger, MD,<sup>4</sup> Maria Blettner,  
39 PhD,<sup>5</sup> Nele Friedrich, PhD,<sup>6</sup> Thomas J Wang<sup>1</sup>, MD, Bruce M. Psaty,<sup>2</sup> MD, Cornelia M van Duijn, PhD,<sup>3</sup> H.-  
40 Erich Wichmann, MD,<sup>4</sup> Thomas F. Munzel, MD,<sup>5</sup> Heyo K. Kroemer, PhD,<sup>6</sup> Emelia J. Benjamin<sup>1</sup>, MD, ScM,  
41 Jerome I. Rotter, MD,<sup>2</sup> Jacqueline C. Witteman, PhD,<sup>3</sup> Heribert Schunkert, MD,<sup>4</sup> Helena Schmidt, MD,  
42 PhD,<sup>7</sup> Henry Völzke, MD,<sup>6</sup> Stefan Blankenberg, MD.<sup>5</sup>

1 <sup>1</sup>National Heart, Lung, and Blood Institute's Framingham Heart Study, Framingham, MA; <sup>2</sup>The  
2 Cardiovascular Health Study; <sup>3</sup>Rotterdam Study, Erasmus MC, The Netherlands; <sup>4</sup>MONICA/KORA  
3 Augsburg Echocardiographic Substudy, Germany; <sup>5</sup>Gutenberg Heart Study, Germany; <sup>6</sup>Study of Health in  
4 Pomerania, Germany; <sup>7</sup>Austrian Stroke Prevention Study, Austria; <sup>8</sup>PIVUS Study, Sweden; <sup>9</sup>Mayo Clinic,  
5 Rochester, MN; <sup>10</sup>CARLA Study, Germany; <sup>11</sup>Center for Population Studies, National Heart, Lung, and  
6 Blood Institute, Bethesda, MD  
7 *Cardiovascular Health Study:*  
8 Arnett: Department of Epidemiology, University of Alabama at Birmingham, Birmingham, AL  
9 Gottdiener: University of Maryland Hospital, Division of Cardiology, Baltimore, MD  
10 Glazer: Cardiovascular Health Research Unit and Department of Medicine, University of Washington,  
11 Seattle, WA.  
12 Bis: Cardiovascular Health Research Unit and Department of Medicine, University of Washington,  
13 Seattle, WA.  
14 Lumley: Department of Biostatistics, University of Washington, Seattle, WA.  
15 Haritunians: Medical Genetics Institute, Cedars-Sinai Medical Center, West Los Angeles, CA  
16 Heckbert: Department of Epidemiology, University of Washington, Seattle, WA.  
17 Smith: Department of Epidemiology, University of Washington; Seattle Epidemiologic Research and  
18 Information Center of the Department of Veterans Affairs Office of Research and Development, Seattle,  
19 WA.  
20 Rice: Department of Biostatistics, University of Washington, Seattle, WA.  
21 Psaty: Departments of Medicine, Epidemiology and Health Services, University of Washington, Seattle,  
22 WA; Center for Health Studies, Group Health, Seattle, WA.  
23 Rotter: Medical Genetics Institute, Cedars-Sinai Medical Center, West Los Angeles, CA.  
24 *Rotterdam* *Study:*  
25 Janine Felix: Department of Epidemiology, Erasmus MC Rotterdam, the Netherlands; Member of the  
26 Netherlands Consortium on Healthy Aging  
27 Dehghan: Department of Epidemiology, Erasmus MC, Rotterdam, the Netherlands  
28 Aulchenko: Department of Epidemiology, Erasmus MC, Rotterdam, the Netherlands  
29 Rivadeneira: Department of Internal Medicine, Erasmus MC, Rotterdam, the Netherlands  
30 Deckers: Department of Cardiology, Thoraxcenter, Erasmus MC, Rotterdam the Netherlands  
31 Stricker: Department of Epidemiology, Erasmus MC, Rotterdam, the Netherlands  
32 Hofman: Department of Epidemiology, Erasmus MC, Rotterdam, the Netherlands  
33 Uitterlinden: Department of Internal Medicine, Erasmus MC, Rotterdam, the Netherlands  
34 Van Duijn: Department of Epidemiology, Erasmus MC, Rotterdam, the Netherlands  
35 Witteman: Department of Epidemiology, Erasmus MC, Rotterdam, the Netherlands; Member of the  
36 Netherlands Consortium on Healthy Aging  
37 *MONICA-KORA*  
38 Lieb: Medical Clinic 2, University of Lübeck, Germany  
39 Großhennig: Medical Clinic 2 and Institute of Medical Biometry and Statistics, University of Lübeck,  
40 Germany  
41 König: Institute of Medical Biometry and Statistics, University of Lübeck, Germany  
42 Erdmann: Medical Clinic 2, University of Lübeck, Germany  
43 Stritzke: Medical Clinic 2, University of Lübeck, Germany  
44 Wichmann: Institute of Epidemiology, Helmholtz Zentrum München, German Research Center for  
45 Environmental Health, Neuherberg, Germany; Ludwig Maximilians University, Munich, Germany  
46 Meitinger: Institute of Human Genetics, Helmholtz Zentrum München, German Research Center for  
47 Environmental Health, Neuherberg, Germany; Technische Universität München, Munich, Germany  
48 Schunkert: Medical Clinic 2, University of Lübeck, Germany  
49 *Framingham Heart Study:*

1 Departments of Medicine, Preventive medicine and cardiology sections, Boston University School of  
2 Medicine (Ramachandran S. Vasan, Emelia J. Benjamin), Department of Mathematics and statistics,  
3 Boston University (Martin G. Larson), Framingham Heart Study (Ramachandran S. Vasan, Martin G.  
4 Larson, Jayashri Aragam, Sekar Kathiresan, Thomas J. Wang, Emelia J. Benjamin), National Heart Lung  
5 Blood Institute (Christopher J. O'Donnell, Daniel Levy).

#### 6 *Gutenberg Heart Study*

7 Departments of Medicine II (Philipp Wild, Tanja Zeller, Renate Schnabel, Thomas F Münzel, Stefan  
8 Blankenberg), Clinical Chemistry and Laboratory Medicine (Karl J Lackner), Institute of Medical Biometry,  
9 Epidemiology, and Informatics (Maria Blettner), Johannes Gutenberg-University, Mainz, Institute for  
10 Medical Biometry and Statistics (Arne Schillert and Andreas Ziegler), University Lübeck, Germany

#### 11 *Study of Health in Pomerania*

12 Department of Internal Medicine B (Stephan B. Felix, Marcus Dörr, Thorsten Reffellmann), Interfaculty  
13 Institute for Genetics and Functional Genomics (Alexander Teumer, Georg Homuth, Uwe Völker),  
14 Institute of Pharmacology (Heyo K. Kroemer) and  
15 Institute for Community Medicine (Nele Friedrich, Henry Völzke), Ernst-Moritz-Arndt-Universität,  
16 Greifswald, Germany

#### 17 *Austrian Stroke Prevention Study*

18 Norbert Watzinger, MD: Department of Internal Medicine, Division of Cardiology, Medical University  
19 Graz, Auenbruggerplatz 15, 8036 Graz, Austria

20 Reinhold Schmidt, MD: Department of Neurology, Medical University Graz, Auenbruggerplatz 22, A-8036  
21 Graz, Austria.

22 Maksim Struchalin: Genetic Epidemiology Unit, Department of Epidemiology and Biostatistics  
23 Erasmus MC Rotterdam

24 Robert Zweiker, MD: Department of Internal Medicine, Division of Cardiology, Medical University Graz,  
25 Auenbruggerplatz 15, 8036 Graz, Austria

26 Helena Schmidt, MD, PhD: Institute for Molecular Biology and Biochemistry, Medical University Graz,  
27 Harrachgasse 21, 8010 Graz, Austria

## 28 **CHARGE Heart Failure Consortium**

29 **Members:** Nicholas L. Smith\*, PhD, Janine F. Felix\*, MD, PhD, Alanna C. Morrison\*, PhD, Serkalem  
30 Demissie\*, PhD, Nicole L. Glazer, PhD, Laura R. Loehr, MD, PhD, L. Adrienne Cupples, PhD, Abbas  
31 Dehghan, MD DSc, Thomas Lumley, PhD, Wayne D. Rosamond, PhD, Wolfgang Lieb, MD, Fernando  
32 Rivadeneira, MD, PhD, Joshua C. Bis, PhD, Aaron R. Folsom, MD, Emelia Benjamin, MD, Yurii S.  
33 Aulchenko, PhD, Talin Haritunians, PhD, David Couper, PhD, Joanne Murabito, MD, Ying A. Wang, PhD,  
34 Bruno H. Stricker, MMed, PhD, John S. Gottdiener, MD, Patricia P. Chang, MD, MHS, Thomas J. Wang,  
35 MD, Kenneth M. Rice, PhD, Albert Hofman, MD, PhD, Susan R. Heckbert, MD, PhD, Ervin R. Fox, MD,  
36 Christopher J. O'Donnell, MD, Andre G.Uitterlinden, PhD, Jerome I. Rotter, MD, James T. Willerson, MD,  
37 Daniel Levy, MD, Cornelia M. van Duijn, PhD, Bruce M. Psaty\*\*, MD, PhD, Jacqueline C. M. Witteman\*\*,  
38 PhD, Eric Boerwinkle\*\*, Ramachandran S. Vasan, MD\*\* (Denotes lead\* and senior\*\* authors for each  
39 cohort who equally contributed to the manuscript.)

40 **Affiliations: Cardiovascular Health Study:** Departments of Epidemiology (NLS, SRH, BMP), Medicine  
41 (NLG, JCB, BMP), Biostatistics (TL, KMR), and Health Services (BMP) University of Washington, Seattle,  
42 Washington; Seattle Epidemiologic Research and Information Center of the Department of Veterans  
43 Affairs Office of Research and Development, Seattle, Washington (NLS); Group Health Center for Health  
44 Studies, Group Health, Seattle, Washington (SRH, BMP); Department of Cardiology, University of  
45 Maryland (JSG); Medical Genetics Institute, Cedars-Sinai Medical Center, Los Angeles, California (TH,  
46 JIR). **Arteriosclerosis Risk in Communities Study:** University of Texas at Houston Health Science Center,  
47 Houston, Texas (ACM, EB, JTW); Departments of Medicine (LRL, PPC), Biostatistics (DC), and

1 Epidemiology (WDR) University of North Carolina at Chapel Hill, Chapel Hill, North Carolina; National  
2 Institute of Environmental Health Sciences, Research Triangle Park, North Carolina (LRL), University of  
3 Minnesota School of Public Health, Minneapolis, Minnesota (ARF); Department of Medicine, University  
4 of Mississippi Medical Center (ERF) and the National Heart, Lung, and Blood Institute Jackson Heart  
5 Study (ERF), Texas Heart Institute (JTW). **Framingham Heart Study:** Department of Biostatistics, Boston  
6 University School of Public Health, Boston, Massachusetts (SD, LAC, YAW); Sections of Preventive  
7 Medicine, and Cardiology, Boston University School of Medicine, Boston, MA (RSV); National Heart Lung  
8 and Blood Institute, Bethesda, MD (CJO, DL); Massachusetts General Hospital, Harvard Medical School,  
9 Boston, MA (TJW, CJO); Framingham Heart Study, Framingham, Massachusetts (LAC, WL, EB, JM, TJW,  
10 CJO, DL, RSV). **Rotterdam Study:** Departments of Epidemiology (JFF, AD, YSA, BHS, AH, CMvD, JCMW)  
11 and Internal Medicine (FR, AGU), Erasmus MC, Rotterdam, the Netherlands; Member of the Netherlands  
12 Consortium on Healthy Aging (JFF, JCMW).

### 13 **The Wellcome Trust Case Control Consortium (WTCCC)**

14 **Management Committee:** Paul R Burton<sup>1</sup>, David G Clayton<sup>2</sup>, Lon R Cardon<sup>3</sup>, Nick Craddock<sup>4</sup>, Panos  
15 Deloukas<sup>5</sup>, Audrey Duncanson<sup>6</sup>, Dominic P Kwiatkowski<sup>3,5</sup>, Mark I McCarthy<sup>3,7</sup>, Willem H Ouwehand<sup>8,9</sup>,  
16 Nilesh J Samani<sup>10</sup>, John A Todd<sup>2</sup>, Peter Donnelly (Chair)<sup>11</sup>  
17 **Analysis Committee:** Jeffrey C Barrett<sup>3</sup>, Paul R Burton<sup>1</sup>, Dan Davison<sup>11</sup>, Peter Donnelly<sup>11</sup>, Doug Easton<sup>12</sup>,  
18 David Evans<sup>3</sup>, Hin-Tak Leung<sup>2</sup>, Jonathan L Marchini<sup>11</sup>, Andrew P Morris<sup>3</sup>, Chris CA Spencer<sup>11</sup>, Martin D  
19 Tobin<sup>1</sup>, Lon R Cardon (Co-chair)<sup>3</sup>, David G Clayton (Co-chair)<sup>2</sup>  
20 **UK Blood Services & University of Cambridge Controls:** Antony P Attwood<sup>5,8</sup>, James P Boorman<sup>8,9</sup>,  
21 Barbara Cant<sup>8</sup>, Ursula Everson<sup>13</sup>, Judith M Hussey<sup>14</sup>, Jennifer D Jolley<sup>8</sup>, Alexandra S Knight<sup>8</sup>, Kerstin Koch<sup>8</sup>,  
22 Elizabeth Meech<sup>15</sup>, Sarah Nutland<sup>2</sup>, Christopher V Prowse<sup>16</sup>, Helen E Stevens<sup>2</sup>, Niall C Taylor<sup>8</sup>, Graham R  
23 Walters<sup>17</sup>, Neil M Walker<sup>2</sup>, Nicholas A Watkins<sup>8,9</sup>, Thilo Winzer<sup>8</sup>, John A Todd<sup>2</sup>, Willem H Ouwehand<sup>8,9</sup>  
24 **1958 Birth Cohort Controls:** Richard W Jones<sup>18</sup>, Wendy L McArdle<sup>18</sup>, Susan M Ring<sup>18</sup>, David P Strachan<sup>19</sup>,  
25 Marcus Pembrey<sup>18,20</sup>  
26 **Bipolar Disorder (Aberdeen):** Gerome Breen<sup>21</sup>, David St Clair<sup>21</sup>; **(Birmingham):** Sian Caesar<sup>22</sup>, Katherine  
27 Gordon-Smith<sup>22,23</sup>, Lisa Jones<sup>22</sup>; **(Cardiff):** Christine Fraser<sup>23</sup>, Elaine K Green<sup>23</sup>, Detelina Grozeva<sup>23</sup>, Marian  
28 L Hamshere<sup>23</sup>, Peter A Holmans<sup>23</sup>, Ian R Jones<sup>23</sup>, George Kirov<sup>23</sup>, Valentina Moskvina<sup>23</sup>, Ivan Nikolov<sup>23</sup>,  
29 Michael C O'Donovan<sup>23</sup>, Michael J Owen<sup>23</sup>, Nick Craddock<sup>23</sup>; **(London):** David A Collier<sup>24</sup>, Amanda Elkin<sup>24</sup>,  
30 Anne Farmer<sup>24</sup>, Richard Williamson<sup>24</sup>, Peter McGuffin<sup>24</sup>; **(Newcastle):** Allan H Young<sup>25</sup>, I Nicol Ferrier<sup>25</sup>  
31 **Coronary Artery Disease (Leeds):** Stephen G Ball<sup>26</sup>, Anthony J Balmforth<sup>26</sup>, Jennifer H Barrett<sup>26</sup>, D  
32 Timothy Bishop<sup>26</sup>, Mark M Iles<sup>26</sup>, Azhar Maqbool<sup>26</sup>, Nadira Yuldasheva<sup>26</sup>, Alistair S Hall<sup>26</sup>; **(Leicester):**  
33 Peter S Braund<sup>10</sup>, Paul R Burton<sup>1</sup>, Richard J Dixon<sup>10</sup>, Massimo Mangino<sup>10</sup>, Suzanne Stevens<sup>10</sup>, Martin D  
34 Tobin<sup>1</sup>, John R Thompson<sup>1</sup>, Nilesh J Samani<sup>10</sup>  
35 **Crohn's Disease (Cambridge):** Francesca Bredin<sup>27</sup>, Mark Tremelling<sup>27</sup>, Miles Parkes<sup>27</sup>; **(Edinburgh):** Hazel  
36 Drummond<sup>28</sup>, Charles W Lees<sup>28</sup>, Elaine R Nimmo<sup>28</sup>, Jack Satsangi<sup>28</sup>; **(London):** Sheila A Fisher<sup>29</sup>, Alastair  
37 Forbes<sup>30</sup>, Cathryn M Lewis<sup>29</sup>, Clive M Onnie<sup>29</sup>, Natalie J Prescott<sup>29</sup>, Jeremy Sanderson<sup>31</sup>, Christopher G  
38 Mathew<sup>29</sup>; **(Newcastle):** Jamie Barbour<sup>32</sup>, M Khalid Mohiuddin<sup>32</sup>, Catherine E Todhunter<sup>32</sup>, John C  
39 Mansfield<sup>32</sup>; **(Oxford):** Tariq Ahmad<sup>33</sup>, Fraser R Cummings<sup>33</sup>, Derek P Jewell<sup>33</sup>  
40 **Hypertension (Aberdeen):** John Webster<sup>34</sup>; **(Cambridge):** Morris J Brown<sup>35</sup>, David G Clayton<sup>2</sup>; **(Evry,**  
41 **France):** G Mark Lathrop<sup>36</sup>; **(Glasgow):** John Connell<sup>37</sup>, Anna Dominiczak<sup>37</sup>; **(Leicester):** Nilesh J Samani<sup>10</sup>;  
42 **(London):** Carolina A Braga Marcano<sup>38</sup>, Beverley Burke<sup>38</sup>, Richard Dobson<sup>38</sup>, Johannie Gungadoo<sup>38</sup>, Kate L  
43 Lee<sup>38</sup>, Patricia B Munroe<sup>38</sup>, Stephen J Newhouse<sup>38</sup>, Abiodun Onipinla<sup>38</sup>, Chris Wallace<sup>38</sup>, Mingzhan Xue<sup>38</sup>,  
44 Mark Caulfield<sup>38</sup>; **(Oxford):** Martin Farrall<sup>39</sup>  
45 **Rheumatoid Arthritis:** Anne Barton<sup>40</sup>, The Biologics in RA Genetics and Genomics Study Syndicate  
46 (BRAGGS) Steering Committee\*, Ian N Bruce<sup>40</sup>, Hannah Donovan<sup>40</sup>, Steve Eyre<sup>40</sup>, Paul D Gilbert<sup>40</sup>,

1 Samantha L Hider<sup>40</sup>, Anne M Hinks<sup>40</sup>, Sally L John<sup>40</sup>, Catherine Potter<sup>40</sup>, Alan J Silman<sup>40</sup>, Deborah PM  
2 Symmons<sup>40</sup>, Wendy Thomson<sup>40</sup>, Jane Worthington<sup>40</sup>  
3 **Type 1 Diabetes:** David G Clayton<sup>2</sup>, David B Dunger<sup>2,41</sup>, Sarah Nutland<sup>2</sup>, Helen E Stevens<sup>2</sup>, Neil M Walker<sup>2</sup>,  
4 Barry Widmer<sup>2,41</sup>, John A Todd<sup>2</sup>  
5 **Type 2 Diabetes (Exeter):** Timothy M Frayling<sup>42,43</sup>, Rachel M Freathy<sup>42,43</sup>, Hana Lango<sup>42,43</sup>, John R B  
6 Perry<sup>42,43</sup>, Beverley M Shields<sup>43</sup>, Michael N Weedon<sup>42,43</sup>, Andrew T Hattersley<sup>42,43</sup>; **(London):** Graham A  
7 Hitman<sup>44</sup>; **(Newcastle):** Mark Walker<sup>45</sup>; **(Oxford):** Kate S Elliott<sup>3,7</sup>, Christopher J Groves<sup>7</sup>, Cecilia M  
8 Lindgren<sup>3,7</sup>, Nigel W Rayner<sup>3,7</sup>, Nicholas J Timpson<sup>3,46</sup>, Eleftheria Zeggini<sup>3,7</sup>, Mark I McCarthy<sup>3,7</sup>  
9 **Tuberculosis (Gambia):** Melanie Newport<sup>47</sup>, Giorgio Sirugo<sup>47</sup>; **(Oxford):** Emily Lyons<sup>3</sup>, Fredrik Vannberg<sup>3</sup>,  
10 Adrian VS Hill<sup>3</sup>  
11 **Ankylosing Spondylitis:** Linda A Bradbury<sup>48</sup>, Claire Farrar<sup>49</sup>, Jennifer J Pointon<sup>48</sup>, Paul Wordsworth<sup>49</sup>,  
12 Matthew A Brown<sup>48,49</sup>  
13 **Autoimmune Thyroid Disease:** Jayne A Franklyn<sup>50</sup>, Joanne M Heward<sup>50</sup>, Matthew J Simmonds<sup>50</sup>, Stephen  
14 CL Gough<sup>50</sup>  
15 **Breast Cancer:** Sheila Seal<sup>51</sup>, Breast Cancer Susceptibility Collaboration (UK)\*,  
16 Michael R Stratton<sup>51,52</sup>, Nazneen Rahman<sup>51</sup>  
17 **Multiple Sclerosis:** Maria Ban<sup>53</sup>, An Goris<sup>53</sup>, Stephen J Sawcer<sup>53</sup>, Alastair Compston<sup>53</sup>  
18 **Gambian Controls (Gambia):** David Conway<sup>47</sup>, Muminatou Jallow<sup>47</sup>, Melanie Newport<sup>47</sup>, Giorgio Sirugo<sup>47</sup>;  
19 **(Oxford):** Kirk A Rockett<sup>3</sup>, Dominic P Kwiatkowski<sup>3,5</sup>  
20 **DNA, Genotyping, Data QC and Informatics (Wellcome Trust Sanger Institute, Hinxton):** Claire Bryan<sup>5</sup>,  
21 Suzannah J Bumpstead<sup>5</sup>, Amy Chaney<sup>5</sup>, Kate Downes<sup>2,5</sup>, Jilur Ghori<sup>5</sup>, Rhian Gwilliam<sup>5</sup>, Sarah E Hunt<sup>5</sup>,  
22 Michael Inouye<sup>5</sup>, Andrew Keniry<sup>5</sup>, Emma King<sup>5</sup>, Ralph McGinnis<sup>5</sup>, Simon Potter<sup>5</sup>, Rathi Ravindrarajah<sup>5</sup>,  
23 Pamela Whittaker<sup>5</sup>, David Withers<sup>5</sup>, Panos Deloukas<sup>5</sup>; **(Cambridge):** Hin-Tak Leung<sup>2</sup>, Sarah Nutland<sup>2</sup>,  
24 Helen E Stevens<sup>2</sup>, Neil M Walker<sup>2</sup>, John A Todd<sup>2</sup>  
25 **Statistics (Cambridge):** Doug Easton<sup>12</sup>, David G Clayton<sup>2</sup>; **(Leicester):** Paul R Burton<sup>1</sup>, Martin D Tobin<sup>1</sup>;  
26 **(Oxford):** Jeffrey C Barrett<sup>3</sup>, David Evans<sup>3</sup>, Andrew P Morris<sup>3</sup>, Lon R Cardon<sup>3</sup>; **(Oxford):** Niall J Cardin<sup>11</sup>,  
27 Dan Davison<sup>11</sup>, Teresa Ferreira<sup>11</sup>, Joanne Pereira-Gale<sup>11</sup>, Ingeleif B Hallgrimsdóttir<sup>11</sup>, Bryan N Howie<sup>11</sup>,  
28 Jonathan L Marchini<sup>11</sup>, Chris CA Spencer<sup>11</sup>, Zhan Su<sup>11</sup>, Yik Ying Teo<sup>3,11</sup>, Damjan Vukcevic<sup>11</sup>, Peter  
29 Donnelly<sup>11</sup>  
30 **PIs:** David Bentley<sup>5,54</sup>, Matthew A Brown<sup>48,49</sup>, Lon R Cardon<sup>3</sup>, Mark Caulfield<sup>38</sup>, David G Clayton<sup>2</sup>, Alistair  
31 Compston<sup>53</sup>, Nick Craddock<sup>23</sup>, Panos Deloukas<sup>5</sup>, Peter Donnelly<sup>11</sup>, Martin Farrall<sup>39</sup>, Stephen CL Gough<sup>50</sup>,  
32 Alistair S Hall<sup>26</sup>, Andrew T Hattersley<sup>42,43</sup>, Adrian VS Hill<sup>3</sup>, Dominic P Kwiatkowski<sup>3,5</sup>, Christopher G  
33 Mathew<sup>29</sup>, Mark I McCarthy<sup>3,7</sup>, Willem H Ouwehand<sup>8,9</sup>, Miles Parkes<sup>27</sup>, Marcus Pembrey<sup>18,20</sup>, Nazneen  
34 Rahman<sup>51</sup>, Nilesh J Samani<sup>10</sup>, Michael R Stratton<sup>51,52</sup>, John A Todd<sup>2</sup>, Jane Worthington<sup>40</sup>  
35 <sup>1</sup> Genetic Epidemiology Group, Department of Health Sciences, University of Leicester, Adrian Building,  
36 University Road, Leicester, LE1 7RH, UK; <sup>2</sup> Juvenile Diabetes Research Foundation/Wellcome Trust  
37 Diabetes and Inflammation Laboratory, Department of Medical Genetics, Cambridge Institute for  
38 Medical Research, University of Cambridge, Wellcome Trust/MRC Building, Cambridge, CB2 0XY, UK; <sup>3</sup>  
39 Wellcome Trust Centre for Human Genetics, University of Oxford, Roosevelt Drive, Oxford OX3 7BN, UK;  
40 <sup>4</sup> Department of Psychological Medicine, Henry Wellcome Building, School of Medicine, Cardiff  
41 University, Heath Park, Cardiff CF14 4XN, UK; <sup>5</sup> The Wellcome Trust Sanger Institute, Wellcome Trust  
42 Genome Campus, Hinxton, Cambridge CB10 1SA, UK; <sup>6</sup> The Wellcome Trust, Gibbs Building, 215 Euston  
43 Road, London NW1 2BE, UK; <sup>7</sup> Oxford Centre for Diabetes, Endocrinology and Medicine, University of  
44 Oxford, Churchill Hospital, Oxford, OX3 7LJ, UK; <sup>8</sup> Department of Haematology, University of Cambridge,  
45 Long Road, Cambridge, CB2 2PT, UK; <sup>9</sup> National Health Service Blood and Transplant, Cambridge Centre,  
46 Long Road, Cambridge, CB2 2PT, UK; <sup>10</sup> Department of Cardiovascular Sciences, University of Leicester,  
47 Glenfield Hospital, Groby Road, Leicester, LE3 9QP, UK; <sup>11</sup> Department of Statistics, University of Oxford,  
48 1 South Parks Road, Oxford OX1 3TG, UK; <sup>12</sup> Cancer Research UK Genetic Epidemiology Unit,  
49 Strangeways Research Laboratory, Worts Causeway, Cambridge CB1 8RN, UK; <sup>13</sup> National Health Service

1 Blood and Transplant, Sheffield Centre, Longley Lane, Sheffield S5 7JN, UK; <sup>14</sup> National Health Service  
2 Blood and Transplant, Brentwood Centre, Crescent Drive, Brentwood, CM15 8DP, UK; <sup>15</sup> The Welsh  
3 Blood Service, Ely Valley Road, Talbot Green, Pontyclun, CF72 9WB, UK; <sup>16</sup> The Scottish National Blood  
4 Transfusion Service, Ellen's Glen Road, Edinburgh, EH17 7QT, UK; <sup>17</sup> National Health Service Blood and  
5 Transplant, Southampton Centre, Coxford Road, Southampton, SO16 5AF, UK; <sup>18</sup> Avon Longitudinal Study  
6 of Parents and Children, University of Bristol, 24 Tyndall Avenue, Bristol, BS8 1TQ, UK; <sup>19</sup> Division of  
7 Community Health Services, St George's University of London, Cranmer Terrace, London SW17 0RE, UK;  
8 <sup>20</sup> Institute of Child Health, University College London, 30 Guilford St, London WC1N 1EH, UK; <sup>21</sup>  
9 University of Aberdeen, Institute of Medical Sciences, Foresterhill, Aberdeen, AB25 2ZD, UK; <sup>22</sup>  
10 Department of Psychiatry, Division of Neuroscience, Birmingham University, Birmingham, B15 2QZ, UK;  
11 <sup>23</sup> Department of Psychological Medicine, Henry Wellcome Building, School of Medicine, Cardiff  
12 University, Heath Park, Cardiff CF14 4XN, UK; <sup>24</sup> SGDP, The Institute of Psychiatry, King's College London,  
13 De Crespigny Park Denmark Hill London SE5 8AF, UK; <sup>25</sup> School of Neurology, Neurobiology and  
14 Psychiatry, Royal Victoria Infirmary, Queen Victoria Road, Newcastle upon Tyne, NE1 4LP, UK; <sup>26</sup> LIGHT  
15 and LIMM Research Institutes, Faculty of Medicine and Health, University of Leeds, Leeds, LS1 3EX, UK;  
16 <sup>27</sup> IBD Research Group, Addenbrooke's Hospital, University of Cambridge, Cambridge, CB2 2QQ, UK; <sup>28</sup>  
17 Gastrointestinal Unit, School of Molecular and Clinical Medicine, University of Edinburgh, Western  
18 General Hospital, Edinburgh EH4 2XU UK; <sup>29</sup> Department of Medical & Molecular Genetics, King's College  
19 London School of Medicine, 8th Floor Guy's Tower, Guy's Hospital, London, SE1 9RT, UK; <sup>30</sup> Institute for  
20 Digestive Diseases, University College London Hospitals Trust, London, NW1 2BU, UK; <sup>31</sup> Department of  
21 Gastroenterology, Guy's and St Thomas' NHS Foundation Trust, London, SE1 7EH, UK; <sup>32</sup> Department of  
22 Gastroenterology & Hepatology, University of Newcastle upon Tyne, Royal Victoria Infirmary, Newcastle  
23 upon Tyne, NE1 4LP, UK; <sup>33</sup> Gastroenterology Unit, Radcliffe Infirmary, University of Oxford, Oxford, OX2  
24 6HE, UK; <sup>34</sup> Medicine and Therapeutics, Aberdeen Royal Infirmary, Foresterhill, Aberdeen, Grampian AB9  
25 2ZB, UK; <sup>35</sup> Clinical Pharmacology Unit and the Diabetes and Inflammation Laboratory, University of  
26 Cambridge, Addenbrookes Hospital, Hills Road, Cambridge CB2 2QQ, UK; <sup>36</sup> Centre National de  
27 Genotypage, 2, Rue Gaston Cremieux, Evry, Paris 91057.; <sup>37</sup> BHF Glasgow Cardiovascular Research  
28 Centre, University of Glasgow, 126 University Place, Glasgow, G12 8TA, UK; <sup>38</sup> Clinical Pharmacology and  
29 Barts and The London Genome Centre, William Harvey Research Institute, Barts and The London, Queen  
30 Mary's School of Medicine, Charterhouse Square, London EC1M 6BQ, UK; <sup>39</sup> Cardiovascular Medicine,  
31 University of Oxford, Wellcome Trust Centre for Human Genetics, Roosevelt Drive, Oxford OX3 7BN, UK;  
32 <sup>40</sup>arc Epidemiology Research Unit, University of Manchester, Stopford Building, Oxford Rd, Manchester,  
33 M13 9PT, UK; <sup>41</sup> Department of Paediatrics, University of Cambridge, Addenbrooke's Hospital,  
34 Cambridge, CB2 2QQ, UK; <sup>42</sup> Genetics of Complex Traits, Institute of Biomedical and Clinical Science,  
35 Peninsula Medical School, Magdalen Road, Exeter EX1 2LU UK; <sup>43</sup> Diabetes Genetics, Institute of  
36 Biomedical and Clinical Science, Peninsula Medical School, Barrack Road, Exeter EX2 5DU UK; <sup>44</sup> Centre  
37 for Diabetes and Metabolic Medicine, Barts and The London, Royal London Hospital, Whitechapel,  
38 London, E1 1BB UK; <sup>45</sup> Diabetes Research Group, School of Clinical Medical Sciences, Newcastle  
39 University, Framlington Place, Newcastle upon Tyne NE2 4HH, UK; <sup>46</sup> The MRC Centre for Causal Analyses  
40 in Translational Epidemiology, Bristol University, Canynge Hall, Whiteladies Rd, Bristol BS2 8PR, UK; <sup>47</sup>  
41 MRC Laboratories, Fajara, The Gambia; <sup>48</sup> Diamantina Institute for Cancer, Immunology and Metabolic  
42 Medicine, Princess Alexandra Hospital, University of Queensland, Woolloongabba, Qld 4102, Australia; <sup>49</sup>  
43 Botnar Research Centre, University of Oxford, Headington, Oxford OX3 7BN, UK; <sup>50</sup> Department of  
44 Medicine, Division of Medical Sciences, Institute of Biomedical Research, University of Birmingham,  
45 Edgbaston, Birmingham B15 2TT, UK; <sup>51</sup> Section of Cancer Genetics, Institute of Cancer Research, 15  
46 Cotswold Road, Sutton, SM2 5NG, UK; <sup>52</sup> Cancer Genome Project, The Wellcome Trust Sanger Institute,  
47 Wellcome Trust Genome Campus, Hinxton, Cambridge CB10 1SA, UK; <sup>53</sup> Department of Clinical  
48 Neurosciences, University of Cambridge, Addenbrooke's Hospital, Hills Road, Cambridge CB2 2QQ, UK; <sup>54</sup>



1 PRESENT ADDRESS: Illumina Cambridge, Chesterford Research Park, Little Chesterford, Nr Saffron  
2 Walden, Essex, CB10 1XL, UK

3 **18 Author information**

4 Inês Barroso: Owns stock in Incyte and GlaxoSmithKline. Aravinda Chakravarti: Is a paid member of the  
5 Scientific Advisory Board of Biogen Idec. These potential conflicts of interest are managed by the policies  
6 of Johns Hopkins University School of Medicine. Daniel I. Chasman: Genotyping and collaborative  
7 scientific support from Amgen. Support for genetic analysis from AstraZeneca. Janine F. Felix: Worked  
8 until 2013 in ErasmusAGE, a centre for ageing research across the life course funded by Nestlé Nutrition  
9 (Nestec Ltd.), Metagenics Inc. and AXA. Hincó J. Gierman: Currently works for Illumina. Toby Johnson: Is  
10 an employee of and owns stock in GlaxoSmithKline. Bruce M. Psaty: Serves on the DSMB for a clinical  
11 trial funded by the manufacturer (Zoll LifeCor) and on the Steering Committee for the Yale Open Data  
12 Access Project funded by Johnson & Johnson. Paul M. Ridker: Genotyping and collaborative scientific  
13 support from Amgen. Support for genetic analysis from AstraZeneca.
